# Supplementary material
Source: Research Square preprint supplement (doi:10.21203/rs.3.rs-8132276/v1)
Supplement: Supplementary file 1 [file 2027b252ce0959f711bdfba7.xlsx]

## Sheet: Sipplementary_Table_1
1.6 µM DHEAS metabolism										15 nM DHEA metabolism									3 nM A4 metabolism							15 nM 11OHA4 metabolism										3 nM 11KA4 metabolism
Time (h)	Group	Group2	DHEAS_nM	DHEA_nM	A4_nM	T_nM	DHT_nM			Time (h)	Group	Group2	DHEA_nM	A4_nM	T_nM	DHT_nM			Time (h)	Group	Group2	A4_nM	T_nM			Time (h)	Group	Group2	11OHA4_nM	11KA4_nM	11OHT_nM	11KT_nM	11KDHT_nM			Time (h)	Group	Group2	11KA4_nM	11OHA4_nM	11OHT_nM	11KT_nM	11KDHT_nM
4	HIO-80	Control	1796.47	4	0.1	0.04	0			4	HIO-80	Control	12.379	0.025	0.009	0			4	HIO-80	Control	2.843	0.019			4	HIO-80	Control	16.18	0.04	0	0	0			4	HIO-80	Control	3.07	0	0	0	0
4	HIO-80	Control	1639.08	4.25	0.1	0.05	0			4	HIO-80	Control	15.898	0.024	0	0			4	HIO-80	Control	2.634	0.045			4	HIO-80	Control	14.51	0.03	0	0	0			4	HIO-80	Control	4.08	0	0	0	0
4	HIO-80	Control	1682.5	3.52	0.16	0.03	0			4	HIO-80	Control	16.383	0.089	0.003	0			4	HIO-80	Control	2.791	0.017			4	HIO-80	Control	17.45	0.05	0	0	0			4	HIO-80	Control	3.51	0	0	0	0
4	HIO-80	Control	2024.42	3.35	0.15	0.02	0			4	HIO-80	Control	19.393	0.03	0	0			4	HIO-80	Control	2.634	0.017			4	HIO-80	Control	12.13	0.03	0	0	0			4	HIO-80	Control	3.35	0	0	0	0
4	HIO-80	Control	1655.36	4.125	0.1	0.045	0			4	HIO-80	Control	14.138	0.024	0.004	0			4	HIO-80	Control	2.738	0.032			4	HIO-80	Control	15.35	0.04	0	0	0			4	HIO-80	Control	3.58	0	0	0	0
4	HIO-80	Control	2073.27	3.435	0.155	0.025	0			4	HIO-80	Control	17.888	0.06	0.001	0			4	HIO-80	Control	2.712	0.017			4	HIO-80	Control	14.79	0.04	0	0	0			4	HIO-80	Control	3.43	0	0	0	0
4	OVSAHO	Metastasis abdomen	1943.01	1.52	0.02	0.01	0			4	OVSAHO	Metastasis abdomen	11.141	0.027	0	0			4	OVSAHO	Metastasis abdomen	1.635	0.015			4	OVSAHO	Metastasis abdomen	17.41	1.01	0	0.03	0			4	OVSAHO	Metastasis abdomen	2.6	0	0	0.1	0
4	OVSAHO	Metastasis abdomen	1552.24	1.98	0.03	0	0			4	OVSAHO	Metastasis abdomen	10.049	0.045	0	0			4	OVSAHO	Metastasis abdomen	1.534	0.015			4	OVSAHO	Metastasis abdomen	18.98	1.08	0	0.03	0			4	OVSAHO	Metastasis abdomen	3.07	0	0	0.13	0
4	OVSAHO	Metastasis abdomen	1856.17	2.33	0.03	0.01	0			4	OVSAHO	Metastasis abdomen	10.85	0.031	0	0			4	OVSAHO	Metastasis abdomen	1.747	0.015			4	OVSAHO	Metastasis abdomen	14.7	0.7	0	0.02	0			4	OVSAHO	Metastasis abdomen	2.35	0	0	0.1	0
4	OVSAHO	Metastasis abdomen	1731.34	2.13	0.03	0	0			4	OVSAHO	Metastasis abdomen	9.296	0.022	0	0			4	OVSAHO	Metastasis abdomen	1.549	0.011			4	OVSAHO	Metastasis abdomen	16.18	0.86	0	0.02	0			4	OVSAHO	Metastasis abdomen	2.74	0	0	0.12	0
4	OVSAHO	Metastasis abdomen	1525.1	2.84	0.03	0.01	0			4	OVSAHO	Metastasis abdomen	10.388	0.016	0	0			4	OVSAHO	Metastasis abdomen	1.416	0.012			4	OVSAHO	Metastasis abdomen	16.83	1.72	0	0.09	0			4	OVSAHO	Metastasis abdomen	3.32	0	0	0.13	0
4	OVSAHO	Metastasis abdomen	1850.75	2.52	0.03	0.01	0			4	OVSAHO	Metastasis abdomen	11.311	0.017	0	0.005			4	OVSAHO	Metastasis abdomen	1.108	0.01			4	OVSAHO	Metastasis abdomen	16.55	1.63	0	0.08	0			4	OVSAHO	Metastasis abdomen	2.84	0	0	0.1	0
4	KURAMOCHI	Metastasis ascites 1	1831.75	2.77	0.06	0.01	0			4	KURAMOCHI	Metastasis ascites 1	17.087	0.002	0	0			4	KURAMOCHI	Metastasis ascites 1	2.099	0.012			4	KURAMOCHI	Metastasis ascites 1	16.74	3.25	0	0.04	0			4	KURAMOCHI	Metastasis ascites 1	3.74	0	0	0.08	0
4	KURAMOCHI	Metastasis ascites 1	1682.5	2.77	0.05	0.01	0			4	KURAMOCHI	Metastasis ascites 1	17.791	0.008	0	0			4	KURAMOCHI	Metastasis ascites 1	2.444	0.008			4	KURAMOCHI	Metastasis ascites 1	15.49	3.1	0	0.04	0			4	KURAMOCHI	Metastasis ascites 1	3.51	0	0	0.08	0
4	KURAMOCHI	Metastasis ascites 1	1635.01	1.3	0.03	0	0			4	KURAMOCHI	Metastasis ascites 1	14.393	0	0	0			4	KURAMOCHI	Metastasis ascites 1	1.969	0.008			4	KURAMOCHI	Metastasis ascites 1	12.18	2.38	0	0.03	0			4	KURAMOCHI	Metastasis ascites 1	2.44	0.01	0	0.07	0
4	KURAMOCHI	Metastasis ascites 1	1913.16	1.38	0.02	0.01	0			4	KURAMOCHI	Metastasis ascites 1	15.194	0.004	0	0			4	KURAMOCHI	Metastasis ascites 1	2.173	0.015			4	KURAMOCHI	Metastasis ascites 1	16.11	3.18	0	0.04	0			4	KURAMOCHI	Metastasis ascites 1	2.72	0	0	0.07	0
4	KURAMOCHI	Metastasis ascites 1	1770.69	2.34	0.03	0.01	0			4	KURAMOCHI	Metastasis ascites 1	13.811	0.004	0	0			4	KURAMOCHI	Metastasis ascites 1	2.201	0.036			4	KURAMOCHI	Metastasis ascites 1	14.44	3.6	0	0.04	0			4	KURAMOCHI	Metastasis ascites 1	3.58	0	0	0.08	0
4	KURAMOCHI	Metastasis ascites 1	1852.1	1.63	0.02	0.01	0			4	KURAMOCHI	Metastasis ascites 1	13.908	0	0	0			4	KURAMOCHI	Metastasis ascites 1	1.711	0.014			4	KURAMOCHI	Metastasis ascites 1	14.15	2.78	0	0.03	0			4	KURAMOCHI	Metastasis ascites 1	3.72	0	0	0.08	0
4	COV362	Metastasis pleural effusion	1709.63	1.92	0.03	0	0			4	COV362	Metastasis pleural effusion	17.282	0	0	0			4	COV362	Metastasis pleural effusion	2.869	0			4	COV362	Metastasis pleural effusion	17.01	0.14	0.02	0.01	0			4	COV362	Metastasis pleural effusion	3.3	0	0.01	0.04	0
4	COV362	Metastasis pleural effusion	2252.37	1.26	0.01	0	0			4	COV362	Metastasis pleural effusion	16.796	0	0	0.012			4	COV362	Metastasis pleural effusion	2.947	0			4	COV362	Metastasis pleural effusion	16.2	0.19	0	0	0			4	COV362	Metastasis pleural effusion	2.84	0	0	0.03	0
4	COV362	Metastasis pleural effusion	1867.03	1.54	0.02	0	0			4	COV362	Metastasis pleural effusion	15.777	0	0	0			4	COV362	Metastasis pleural effusion	2.277	0.003			4	COV362	Metastasis pleural effusion	13.8	0.03	0	0	0			4	COV362	Metastasis pleural effusion	3.03	0	0	0	0
4	COV362	Metastasis pleural effusion	1644.5	1.91	0.03	0	0			4	COV362	Metastasis pleural effusion	13.835	0	0	0			4	COV362	Metastasis pleural effusion	2.561	0.016			4	COV362	Metastasis pleural effusion	13.75	0.03	0	0	0			4	COV362	Metastasis pleural effusion	3.3	0	0	0.02	0
4	COV362	Metastasis pleural effusion	1910.45	2.17	0.06	0.01	0			4	COV362	Metastasis pleural effusion	12.136	0	0	0			4	COV362	Metastasis pleural effusion	2.324	0.019			4	COV362	Metastasis pleural effusion	14.42	0.04	0	0	0			4	COV362	Metastasis pleural effusion	3.09	0	0	0.06	0
4	COV362	Metastasis pleural effusion	1731.34	2.62	0.06	0.01	0			4	COV362	Metastasis pleural effusion	11.578	0	0	0			4	COV362	Metastasis pleural effusion	2.843	0.017			4	COV362	Metastasis pleural effusion	14.21	0.04	0	0	0			4	COV362	Metastasis pleural effusion	3.35	0	0	0.06	0
4	OVCAR3	Metastasis ascites 2	1899.59	0.54	0.02	0	0			4	OVCAR3	Metastasis ascites 2	16.383	0	0.008	0			4	OVCAR3	Metastasis ascites 2	2.483	0.035			4	OVCAR3	Metastasis ascites 2	21	0.02	0	0	0			4	OVCAR3	Metastasis ascites 2	3.21	0	0	0.01	0
4	OVCAR3	Metastasis ascites 2	2170.96	0.49	0.02	0	0			4	OVCAR3	Metastasis ascites 2	19.466	0	0.044	0			4	OVCAR3	Metastasis ascites 2	3.26	0.033			4	OVCAR3	Metastasis ascites 2	21.46	0.01	0	0	0			4	OVCAR3	Metastasis ascites 2	3.37	0	0	0.01	0
4	OVCAR3	Metastasis ascites 2	1546.81	0.75	0.02	0	0			4	OVCAR3	Metastasis ascites 2	19.563	0.008	0.003	0			4	OVCAR3	Metastasis ascites 2	2.144	0.02			4	OVCAR3	Metastasis ascites 2	16.76	0.05	0	0	0			4	OVCAR3	Metastasis ascites 2	3.23	0	0	0.02	0
4	OVCAR3	Metastasis ascites 2	1785.62	0.76	0.02	0	0			4	OVCAR3	Metastasis ascites 2	23.811	0	0.017	0			4	OVCAR3	Metastasis ascites 2	2.162	0.073			4	OVCAR3	Metastasis ascites 2	21.23	0.02	0	0	0			4	OVCAR3	Metastasis ascites 2	3	0	0	0.03	0
4	OVCAR3	Metastasis ascites 2	1526.46	0.99	0.02	0	0			4	OVCAR3	Metastasis ascites 2	27.67	0.001	0	0			4	OVCAR3	Metastasis ascites 2	2.342	0.021			4	OVCAR3	Metastasis ascites 2	16	0	0	0	0			4	OVCAR3	Metastasis ascites 2	4.62	0	0	0	0
4	OVCAR3	Metastasis ascites 2	1626.87	1.43	0.03	0	0			4	OVCAR3	Metastasis ascites 2	24.272	0.007	0	0			4	OVCAR3	Metastasis ascites 2	2.41	0.004			4	OVCAR3	Metastasis ascites 2	19	0.03	0	0	0			4	OVCAR3	Metastasis ascites 2	3.81	0	0	0	0
4	OVCAR4	Metastasis ascites 3	1872.46	1.41	0.06	0.02	0			4	OVCAR4	Metastasis ascites 3	19.175	0.008	0	0			4	OVCAR4	Metastasis ascites 3	2.738	0.036			4	OVCAR4	Metastasis ascites 3	15.09	0.08	0	0	0			4	OVCAR4	Metastasis ascites 3	2.04	0	0	0.05	0
4	OVCAR4	Metastasis ascites 3	1921.3	1.46	0.02	0.01	0			4	OVCAR4	Metastasis ascites 3	22.427	0.012	0.052	0			4	OVCAR4	Metastasis ascites 3	2.363	0.02			4	OVCAR4	Metastasis ascites 3	19.05	0.05	0	0	0			4	OVCAR4	Metastasis ascites 3	2.77	0	0	0.05	0
4	OVCAR4	Metastasis ascites 3	1758.48	0.96	0.06	0.02	0			4	OVCAR4	Metastasis ascites 3	21.796	0.01	0	0			4	OVCAR4	Metastasis ascites 3	2.686	0.033			4	OVCAR4	Metastasis ascites 3	17.57	0.09	0	0	0			4	OVCAR4	Metastasis ascites 3	2.91	0	0	0.03	0
4	OVCAR4	Metastasis ascites 3	1764.99	1.11	0.02	0.01	0			4	OVCAR4	Metastasis ascites 3	20.607	0.004	0.004	0			4	OVCAR4	Metastasis ascites 3	2.316	0.02			4	OVCAR4	Metastasis ascites 3	17.07	0.07	0	0	0			4	OVCAR4	Metastasis ascites 3	3.09	0	0	0.03	0
4	OVCAR4	Metastasis ascites 3	1473.54	0.65	0.03	0.01	0			4	OVCAR4	Metastasis ascites 3	22.184	0.008	0	0			4	OVCAR4	Metastasis ascites 3	2.634	0.027			4	OVCAR4	Metastasis ascites 3	18.8	0.07	0	0	0			4	OVCAR4	Metastasis ascites 3	3.44	0	0	0.02	0
4	OVCAR4	Metastasis ascites 3	1953.87	0.72	0.02	0.01	0			4	OVCAR4	Metastasis ascites 3	20.898	0	0.005	0			4	OVCAR4	Metastasis ascites 3	2.566	0.023			4	OVCAR4	Metastasis ascites 3	17.94	0.07	0	0	0			4	OVCAR4	Metastasis ascites 3	3.3	0	0	0.01	0
4	CAOV3	Primary OC	1909.91	0.69	0.04	0.01	0			4	CAOV3	Primary OC	10.631	0.102	0	0			4	CAOV3	Primary OC	2.399	0.031			4	CAOV3	Primary OC	19.35	0.18	0	0	0			4	CAOV3	Primary OC	2.88	0	0	0.06	0
4	CAOV3	Primary OC	1939.21	0.94	0.05	0.02	0			4	CAOV3	Primary OC	17.087	0.105	0	0			4	CAOV3	Primary OC	2.765	0.025			4	CAOV3	Primary OC	17.71	0.14	0	0	0			4	CAOV3	Primary OC	3.28	0	0	0.07	0
4	CAOV3	Primary OC	1619.27	1.02	0.09	0.01	0			4	CAOV3	Primary OC	14.636	0.276	0.002	0			4	CAOV3	Primary OC	1.813	0.019			4	CAOV3	Primary OC	18.15	0.15	0	0.01	0			4	CAOV3	Primary OC	3.02	0	0	0.14	0
4	CAOV3	Primary OC	2012.48	0.93	0.08	0.01	0			4	CAOV3	Primary OC	17.306	0.381	0	0			4	CAOV3	Primary OC	2.167	0.03			4	CAOV3	Primary OC	18.53	0.16	0	0	0			4	CAOV3	Primary OC	3.67	0	0	0.18	0
4	CAOV3	Primary OC	1731.61	0.815	0.045	0.015	0			4	CAOV3	Primary OC	13.859	0.104	0	0			4	CAOV3	Primary OC	2.582	0.028			4	CAOV3	Primary OC	18.34	0.16	0	0.01	0			4	CAOV3	Primary OC	3.08	0	0	0.07	0
4	CAOV3	Primary OC	1641.25	0.975	0.085	0.01	0			4	CAOV3	Primary OC	15.971	0.329	0.001	0			4	CAOV3	Primary OC	1.99	0.025			4	CAOV3	Primary OC	18.44	0.16	0	0	0			4	CAOV3	Primary OC	3.35	0	0	0.16	0
8	HIO-80	Control	1894.17	5.24	0.12	0.05	0			8	HIO-80	Control	13.35	0.038	0.021	0			8	HIO-80	Control	3.025	0.05			8	HIO-80	Control	15.12	0.04	0	0	0			8	HIO-80	Control	3.33	0	0	0	0
8	HIO-80	Control	1948.44	5.39	0.13	0.03	0			8	HIO-80	Control	18.228	0.064	0.005	0			8	HIO-80	Control	2.139	0.03			8	HIO-80	Control	14.51	0.03	0	0	0			8	HIO-80	Control	3.06	0	0	0	0
8	HIO-80	Control	1845.32	4.1	0.21	0.03	0			8	HIO-80	Control	17.985	0.062	0	0			8	HIO-80	Control	3.39	0.024			8	HIO-80	Control	18.36	0.05	0	0	0			8	HIO-80	Control	3.93	0	0	0	0
8	HIO-80	Control	1899.59	3.5	0.16	0.03	0			8	HIO-80	Control	14.199	0.045	0.002	0			8	HIO-80	Control	3.208	0.026			8	HIO-80	Control	14.21	0.06	0	0	0			8	HIO-80	Control	3.79	0	0	0.01	0
8	HIO-80	Control	1535.96	5.315	0.125	0.04	0			8	HIO-80	Control	15.789	0.051	0.013	0			8	HIO-80	Control	2.582	0.04			8	HIO-80	Control	14.82	0.04	0	0	0			8	HIO-80	Control	3.2	0	0	0	0
8	HIO-80	Control	1731.34	3.8	0.185	0.03	0			8	HIO-80	Control	16.092	0.053	0.001	0			8	HIO-80	Control	3.299	0.025			8	HIO-80	Control	16.29	0.06	0	0	0			8	HIO-80	Control	3.86	0	0	0.01	0
8	OVSAHO	Metastasis abdomen	2056.99	3.69	0.03	0.01	0			8	OVSAHO	Metastasis abdomen	12.184	0.07	0	0			8	OVSAHO	Metastasis abdomen	1.987	0.034			8	OVSAHO	Metastasis abdomen	17.66	1.92	0	0.14	0			8	OVSAHO	Metastasis abdomen	3.44	0.02	0	0.35	0
8	OVSAHO	Metastasis abdomen	2111.26	2.89	0.03	0.01	0			8	OVSAHO	Metastasis abdomen	10.073	0.053	0	0			8	OVSAHO	Metastasis abdomen	1.26	0.019			8	OVSAHO	Metastasis abdomen	16.32	1.92	0	0.13	0			8	OVSAHO	Metastasis abdomen	3.39	0	0.01	0.35	0
8	OVSAHO	Metastasis abdomen	1926.73	4.27	0.03	0.01	0			8	OVSAHO	Metastasis abdomen	9.175	0.059	0	0			8	OVSAHO	Metastasis abdomen	1.288	0.022			8	OVSAHO	Metastasis abdomen	14.44	1.83	0	0.13	0			8	OVSAHO	Metastasis abdomen	3.07	0	0	0.32	0
8	OVSAHO	Metastasis abdomen	2013.57	3.93	0.04	0.01	0			8	OVSAHO	Metastasis abdomen	9.199	0.059	0	0			8	OVSAHO	Metastasis abdomen	1.176	0.023			8	OVSAHO	Metastasis abdomen	17.59	2.49	0	0.17	0			8	OVSAHO	Metastasis abdomen	3.67	0	0	0.33	0
8	OVSAHO	Metastasis abdomen	1156.04	4.49	0.03	0.01	0			8	OVSAHO	Metastasis abdomen	8.252	0.031	0	0			8	OVSAHO	Metastasis abdomen	1.088	0.014			8	OVSAHO	Metastasis abdomen	16.27	2.88	0	0.21	0			8	OVSAHO	Metastasis abdomen	3.21	0	0	0.23	0
8	OVSAHO	Metastasis abdomen	1150.61	4.2	0.03	0.01	0			8	OVSAHO	Metastasis abdomen	9.466	0.033	0	0.005			8	OVSAHO	Metastasis abdomen	1.163	0.019			8	OVSAHO	Metastasis abdomen	16.13	3.35	0	0.17	0			8	OVSAHO	Metastasis abdomen	3.44	0	0	0.25	0
8	KURAMOCHI	Metastasis ascites 1	1919.95	3.2	0.04	0.01	0			8	KURAMOCHI	Metastasis ascites 1	14.684	0.013	0	0			8	KURAMOCHI	Metastasis ascites 1	1.661	0.01			8	KURAMOCHI	Metastasis ascites 1	11.28	5.26	0	0.24	0			8	KURAMOCHI	Metastasis ascites 1	3.9	0	0	0.22	0
8	KURAMOCHI	Metastasis ascites 1	1913.16	3.59	0.04	0.01	0			8	KURAMOCHI	Metastasis ascites 1	16.917	0.015	0	0			8	KURAMOCHI	Metastasis ascites 1	1.833	0.016			8	KURAMOCHI	Metastasis ascites 1	10.75	4.98	0	0.23	0			8	KURAMOCHI	Metastasis ascites 1	3.6	0	0	0.27	0
8	KURAMOCHI	Metastasis ascites 1	1601.09	1.47	0.03	0.01	0			8	KURAMOCHI	Metastasis ascites 1	14.903	0.008	0	0			8	KURAMOCHI	Metastasis ascites 1	1.828	0.015			8	KURAMOCHI	Metastasis ascites 1	13.27	5.01	0	0.25	0			8	KURAMOCHI	Metastasis ascites 1	2.53	0.01	0	0.13	0
8	KURAMOCHI	Metastasis ascites 1	1729.99	2.6	0.02	0.02	0			8	KURAMOCHI	Metastasis ascites 1	13.034	0.009	0	0			8	KURAMOCHI	Metastasis ascites 1	1.789	0.018			8	KURAMOCHI	Metastasis ascites 1	13.25	4.86	0	0.28	0			8	KURAMOCHI	Metastasis ascites 1	2.7	0	0	0.16	0
8	KURAMOCHI	Metastasis ascites 1	1614.65	3.25	0.03	0.01	0			8	KURAMOCHI	Metastasis ascites 1	13.762	0.003	0	0			8	KURAMOCHI	Metastasis ascites 1	1.836	0.019			8	KURAMOCHI	Metastasis ascites 1	12.39	6.63	0	0.18	0			8	KURAMOCHI	Metastasis ascites 1	3.95	0	0	0.16	0
8	KURAMOCHI	Metastasis ascites 1	1363.64	3.62	0.02	0.01	0			8	KURAMOCHI	Metastasis ascites 1	13.859	0.006	0	0			8	KURAMOCHI	Metastasis ascites 1	1.734	0.035			8	KURAMOCHI	Metastasis ascites 1	13.74	6.72	0	0.17	0			8	KURAMOCHI	Metastasis ascites 1	3.58	0	0	0.13	0
8	COV362	Metastasis pleural effusion	1546.81	2.38	0.04	0.01	0			8	COV362	Metastasis pleural effusion	15.073	0.001	0.006	0			8	COV362	Metastasis pleural effusion	2.66	0.073			8	COV362	Metastasis pleural effusion	15.65	0.22	0	0	0			8	COV362	Metastasis pleural effusion	2.7	0	0	0.05	0
8	COV362	Metastasis pleural effusion	1801.9	1.79	0.06	0.01	0			8	COV362	Metastasis pleural effusion	13.301	0.009	0.011	0			8	COV362	Metastasis pleural effusion	2.36	0.05			8	COV362	Metastasis pleural effusion	11.6	0.05	0	0	0			8	COV362	Metastasis pleural effusion	3.25	0	0	0.05	0
8	COV362	Metastasis pleural effusion	1552.24	2.085	0.05	0.01	0			8	COV362	Metastasis pleural effusion	14.187	0.005	0.009	0			8	COV362	Metastasis pleural effusion	2.51	0.062			8	COV362	Metastasis pleural effusion	13.63	0.14	0	0	0			8	COV362	Metastasis pleural effusion	2.98	0	0	0.05	0
8	COV362	Metastasis pleural effusion	1807.33	2.1	0.04	0.01	0			8	COV362	Metastasis pleural effusion	13.143	0.001	0	0			8	COV362	Metastasis pleural effusion	2.618	0.024			8	COV362	Metastasis pleural effusion	12.61	0.09	0	0	0			8	COV362	Metastasis pleural effusion	2.98	0	0	0.14	0
8	COV362	Metastasis pleural effusion	2100.41	2.17	0.04	0.01	0			8	COV362	Metastasis pleural effusion	11.99	0.002	0	0			8	COV362	Metastasis pleural effusion	2.499	0.022			8	COV362	Metastasis pleural effusion	16.02	0.07	0	0	0			8	COV362	Metastasis pleural effusion	2.65	0	0	0.12	0
8	COV362	Metastasis pleural effusion	1883.31	2.03	0.04	0.01	0			8	COV362	Metastasis pleural effusion	14.296	0	0	0			8	COV362	Metastasis pleural effusion	2.738	0.026			8	COV362	Metastasis pleural effusion	16.11	0.07	0	0	0			8	COV362	Metastasis pleural effusion	3.3	0	0	0.15	0
8	OVCAR3	Metastasis ascites 2	2170.96	1.07	0.04	0	0			8	OVCAR3	Metastasis ascites 2	16.893	0	0.017	0			8	OVCAR3	Metastasis ascites 2	2.136	0.045			8	OVCAR3	Metastasis ascites 2	22.43	0.11	0	0	0			8	OVCAR3	Metastasis ascites 2	3.42	0	0	0.03	0
8	OVCAR3	Metastasis ascites 2	1782.9	0.73	0.02	0	0			8	OVCAR3	Metastasis ascites 2	20.534	0	0	0			8	OVCAR3	Metastasis ascites 2	3.077	0.033			8	OVCAR3	Metastasis ascites 2	18.89	0.16	0	0	0			8	OVCAR3	Metastasis ascites 2	2.95	0	0	0.01	0
8	OVCAR3	Metastasis ascites 2	1427.41	1.11	0.03	0	0			8	OVCAR3	Metastasis ascites 2	19.66	0.007	0.014	0			8	OVCAR3	Metastasis ascites 2	1.891	0.033			8	OVCAR3	Metastasis ascites 2	16.44	0.14	0	0	0			8	OVCAR3	Metastasis ascites 2	3	0	0	0.07	0
8	OVCAR3	Metastasis ascites 2	1506.11	1.08	0.02	0	0			8	OVCAR3	Metastasis ascites 2	20.485	0	0.006	0			8	OVCAR3	Metastasis ascites 2	1.734	0.024			8	OVCAR3	Metastasis ascites 2	17.08	0.15	0	0	0			8	OVCAR3	Metastasis ascites 2	3.65	0	0	0.05	0
8	OVCAR3	Metastasis ascites 2	1766.62	1.76	0.02	0	0			8	OVCAR3	Metastasis ascites 2	25.971	0.002	0	0			8	OVCAR3	Metastasis ascites 2	1.854	0.002			8	OVCAR3	Metastasis ascites 2	21.41	0.12	0	0.01	0			8	OVCAR3	Metastasis ascites 2	3.56	0	0	0	0
8	OVCAR3	Metastasis ascites 2	2035.28	1.42	0.02	0.02	0			8	OVCAR3	Metastasis ascites 2	24.757	0.011	0	0			8	OVCAR3	Metastasis ascites 2	2.337	0			8	OVCAR3	Metastasis ascites 2	22.31	0.09	0	0.01	0			8	OVCAR3	Metastasis ascites 2	4.69	0	0	0.02	0
8	OVCAR4	Metastasis ascites 3	1986.43	1.26	0.05	0.02	0			8	OVCAR4	Metastasis ascites 3	21.99	0.051	0.027	0			8	OVCAR4	Metastasis ascites 3	1.836	0.05			8	OVCAR4	Metastasis ascites 3	14.98	0.09	0	0	0			8	OVCAR4	Metastasis ascites 3	2.42	0	0	0.09	0
8	OVCAR4	Metastasis ascites 3	1742.2	1.87	0.02	0.02	0			8	OVCAR4	Metastasis ascites 3	19.709	0.052	0.025	0.001			8	OVCAR4	Metastasis ascites 3	2.712	0.053			8	OVCAR4	Metastasis ascites 3	19.98	0.15	0	0	0			8	OVCAR4	Metastasis ascites 3	2.67	0	0	0.09	0
8	OVCAR4	Metastasis ascites 3	1771.51	1.55	0.05	0.02	0			8	OVCAR4	Metastasis ascites 3	21.748	0.012	0	0.001			8	OVCAR4	Metastasis ascites 3	2.491	0.038			8	OVCAR4	Metastasis ascites 3	18.01	0.21	0	0	0			8	OVCAR4	Metastasis ascites 3	2.86	0	0	0.07	0
8	OVCAR4	Metastasis ascites 3	1885.48	1.52	0.02	0.02	0			8	OVCAR4	Metastasis ascites 3	22.306	0.022	0	0			8	OVCAR4	Metastasis ascites 3	2.381	0.037			8	OVCAR4	Metastasis ascites 3	19.68	0.17	0	0	0			8	OVCAR4	Metastasis ascites 3	2.88	0	0	0.08	0
8	OVCAR4	Metastasis ascites 3	1628.22	1.1	0.03	0.01	0			8	OVCAR4	Metastasis ascites 3	20.801	0.01	0.029	0.001			8	OVCAR4	Metastasis ascites 3	2.53	0.023			8	OVCAR4	Metastasis ascites 3	16.37	0.09	0	0	0			8	OVCAR4	Metastasis ascites 3	2.77	0	0	0.01	0
8	OVCAR4	Metastasis ascites 3	1791.04	1.33	0.06	0.01	0			8	OVCAR4	Metastasis ascites 3	24.102	0.003	0	0			8	OVCAR4	Metastasis ascites 3	2.397	0.018			8	OVCAR4	Metastasis ascites 3	11.18	0.06	0	0	0			8	OVCAR4	Metastasis ascites 3	3	0	0	0.03	0
8	CAOV3	Primary OC	1631.48	1.16	0.09	0.01	0			8	CAOV3	Primary OC	13.301	0.326	0	0			8	CAOV3	Primary OC	1.92	0.032			8	CAOV3	Primary OC	17.85	0.31	0	0.01	0			8	CAOV3	Primary OC	2.79	0	0	0.17	0
8	CAOV3	Primary OC	1724.29	1.49	0.1	0.02	0			8	CAOV3	Primary OC	10.728	0.295	0.004	0			8	CAOV3	Primary OC	1.833	0.027			8	CAOV3	Primary OC	18.7	0.33	0	0.01	0			8	CAOV3	Primary OC	3	0	0	0	0
8	CAOV3	Primary OC	1819.54	1.325	0.095	0.015	0			8	CAOV3	Primary OC	12.015	0.31	0.002	0			8	CAOV3	Primary OC	1.876	0.03			8	CAOV3	Primary OC	18.28	0.32	0	0.01	0			8	CAOV3	Primary OC	2.9	0	0	0.09	0
8	CAOV3	Primary OC	1616.82	1.68	0.2	0.01	0			8	CAOV3	Primary OC	15.121	0.741	0.009	0			8	CAOV3	Primary OC	1.768	0.037			8	CAOV3	Primary OC	19.11	0.26	0	0.02	0			8	CAOV3	Primary OC	3.21	0	0	0.32	0
8	CAOV3	Primary OC	1758.48	1.44	0.18	0.01	0			8	CAOV3	Primary OC	14.296	0.738	0.01	0			8	CAOV3	Primary OC	1.614	0.031			8	CAOV3	Primary OC	20.53	0.29	0	0.02	0			8	CAOV3	Primary OC	2.77	0	0	0.27	0
8	CAOV3	Primary OC	2286.02	1.92	0.22	0.01	0			8	CAOV3	Primary OC	15.947	0.743	0.009	0			8	CAOV3	Primary OC	1.922	0.042			8	CAOV3	Primary OC	17.69	0.23	0	0.01	0			8	CAOV3	Primary OC	3.65	0	0	0.37	0
24	HIO-80	Control	1747.63	10.02	0.1	0.03	0			24	HIO-80	Control	11.748	0.09	0.016	0			24	HIO-80	Control	2.139	0.042			24	HIO-80	Control	12.82	0.04	0	0	0			24	HIO-80	Control	3.43	0	0	0.01	0
24	HIO-80	Control	1791.04	8.23	0.09	0.04	0			24	HIO-80	Control	13.617	0.111	0.021	0			24	HIO-80	Control	2.152	0.061			24	HIO-80	Control	14.86	0.08	0.01	0	0			24	HIO-80	Control	2.82	0	0	0.02	0
24	HIO-80	Control	2051.56	12.74	0.26	0.03	0			24	HIO-80	Control	17.015	0.282	0.003	0			24	HIO-80	Control	2.973	0.027			24	HIO-80	Control	17.45	0.12	0	0	0			24	HIO-80	Control	2.95	0	0	0.07	0
24	HIO-80	Control	1899.59	13.2	0.22	0.03	0			24	HIO-80	Control	16.626	0.342	0	0			24	HIO-80	Control	2.592	0.031			24	HIO-80	Control	18.82	0.12	0	0	0			24	HIO-80	Control	2.23	0	0	0.05	0
24	HIO-80	Control	1525.1	8.33	0.17	0.01	0			24	HIO-80	Control	13.471	0.276	0	0.001			24	HIO-80	Control	1.917	0.013			24	HIO-80	Control	16.44	0.21	0.01	0	0.01			24	HIO-80	Control	4	0	0	0.1	0
24	HIO-80	Control	1899.59	7.74	0.14	0	0			24	HIO-80	Control	15.097	0.488	0	0.003			24	HIO-80	Control	2.084	0.026			24	HIO-80	Control	14.95	0.17	0.01	0	0.01			24	HIO-80	Control	4	0	0	0.08	0
24	OVSAHO	Metastasis abdomen	1633.65	6.48	0.07	0	0			24	OVSAHO	Metastasis abdomen	6.189	0.079	0	0			24	OVSAHO	Metastasis abdomen	0.381	0.022			24	OVSAHO	Metastasis abdomen	14.24	2.56	0	0.44	0			24	OVSAHO	Metastasis abdomen	2.56	0	0.01	0.66	0
24	OVSAHO	Metastasis abdomen	1839.89	6.82	0.07	0.01	0			24	OVSAHO	Metastasis abdomen	5.85	0.099	0	0			24	OVSAHO	Metastasis abdomen	0.409	0.025			24	OVSAHO	Metastasis abdomen	13.82	2.79	0	0.43	0			24	OVSAHO	Metastasis abdomen	2.15	0.01	0.01	0.65	0
24	OVSAHO	Metastasis abdomen	1997.29	7.89	0.08	0.01	0			24	OVSAHO	Metastasis abdomen	7.039	0.09	0	0			24	OVSAHO	Metastasis abdomen	0.587	0.026			24	OVSAHO	Metastasis abdomen	12.52	3.53	0	0.58	0			24	OVSAHO	Metastasis abdomen	2.39	0.01	0.01	0.63	0
24	OVSAHO	Metastasis abdomen	2170.96	6.17	0.06	0	0			24	OVSAHO	Metastasis abdomen	7.427	0.092	0	0			24	OVSAHO	Metastasis abdomen	0.642	0.037			24	OVSAHO	Metastasis abdomen	13.13	3.72	0	0.61	0			24	OVSAHO	Metastasis abdomen	1.94	0	0.01	0.6	0
24	OVSAHO	Metastasis abdomen	1150.61	11.19	0.09	0.01	0			24	OVSAHO	Metastasis abdomen	6.335	0.074	0	0			24	OVSAHO	Metastasis abdomen	0.344	0.018			24	OVSAHO	Metastasis abdomen	10.79	5.04	0	1.23	0			24	OVSAHO	Metastasis abdomen	1.9	0	0.01	0.52	0
24	OVSAHO	Metastasis abdomen	1449.12	11.09	0.1	0.01	0			24	OVSAHO	Metastasis abdomen	5.85	0.078	0	0			24	OVSAHO	Metastasis abdomen	0.438	0.02			24	OVSAHO	Metastasis abdomen	9.98	4.51	0	1.14	0			24	OVSAHO	Metastasis abdomen	2.03	0	0.01	0.73	0
24	KURAMOCHI	Metastasis ascites 1	1641.79	9.2	0.06	0.01	0			24	KURAMOCHI	Metastasis ascites 1	10.534	0.023	0	0			24	KURAMOCHI	Metastasis ascites 1	1.672	0.035			24	KURAMOCHI	Metastasis ascites 1	5.76	8.86	0	1.34	0			24	KURAMOCHI	Metastasis ascites 1	2.93	0	0	0.57	0
24	KURAMOCHI	Metastasis ascites 1	1994.57	9.13	0.06	0.01	0			24	KURAMOCHI	Metastasis ascites 1	15.024	0.033	0	0			24	KURAMOCHI	Metastasis ascites 1	1.372	0.031			24	KURAMOCHI	Metastasis ascites 1	5.62	8.92	0	1.24	0			24	KURAMOCHI	Metastasis ascites 1	2.25	0	0	0.45	0
24	KURAMOCHI	Metastasis ascites 1	1736.77	11.07	0.03	0.01	0			24	KURAMOCHI	Metastasis ascites 1	13.495	0.029	0	0			24	KURAMOCHI	Metastasis ascites 1	1.085	0.023			24	KURAMOCHI	Metastasis ascites 1	5.82	9.93	0	1.43	0			24	KURAMOCHI	Metastasis ascites 1	2.44	0	0	0.51	0
24	KURAMOCHI	Metastasis ascites 1	1831.75	11.17	0.03	0.01	0			24	KURAMOCHI	Metastasis ascites 1	13.835	0.039	0	0			24	KURAMOCHI	Metastasis ascites 1	1.45	0.011			24	KURAMOCHI	Metastasis ascites 1	6.85	11.16	0	1.52	0			24	KURAMOCHI	Metastasis ascites 1	2.86	0	0	0.42	0
24	KURAMOCHI	Metastasis ascites 1	1750.34	6.99	0.03	0	0			24	KURAMOCHI	Metastasis ascites 1	14.005	0.034	0	0			24	KURAMOCHI	Metastasis ascites 1	1.32	0.023			24	KURAMOCHI	Metastasis ascites 1	6.33	12.82	0.01	1.3	0			24	KURAMOCHI	Metastasis ascites 1	3.42	0	0	0.72	0
24	KURAMOCHI	Metastasis ascites 1	1336.5	7.35	0.03	0.01	0			24	KURAMOCHI	Metastasis ascites 1	11.748	0.026	0	0			24	KURAMOCHI	Metastasis ascites 1	1.367	0.039			24	KURAMOCHI	Metastasis ascites 1	6.63	12.58	0.01	1.38	0			24	KURAMOCHI	Metastasis ascites 1	3.67	0.02	0	0.62	0
24	COV362	Metastasis pleural effusion	1720.49	7.57	0.04	0.02	0			24	COV362	Metastasis pleural effusion	12.84	0.012	0.027	0.005			24	COV362	Metastasis pleural effusion	2.384	0.066			24	COV362	Metastasis pleural effusion	13.21	0.22	0.01	0.04	0			24	COV362	Metastasis pleural effusion	2.65	0	0.01	0.23	0
24	COV362	Metastasis pleural effusion	1633.65	7.35	0.08	0.01	0			24	COV362	Metastasis pleural effusion	11.481	0.041	0.013	0			24	COV362	Metastasis pleural effusion	1.7	0.08			24	COV362	Metastasis pleural effusion	12.57	0.31	0.02	0.04	0			24	COV362	Metastasis pleural effusion	2.86	0	0	0.24	0
24	COV362	Metastasis pleural effusion	1628.22	6.07	0.05	0.01	0			24	COV362	Metastasis pleural effusion	12.621	0	0	0.02			24	COV362	Metastasis pleural effusion	1.787	0.087			24	COV362	Metastasis pleural effusion	13.84	0.12	0	0.03	0			24	COV362	Metastasis pleural effusion	2.54	0	0.01	0.27	0
24	COV362	Metastasis pleural effusion	2062.42	7.04	0.04	0	0			24	COV362	Metastasis pleural effusion	11.893	0	0	0.043			24	COV362	Metastasis pleural effusion	2.141	0.043			24	COV362	Metastasis pleural effusion	17.08	0.09	0	0.06	0			24	COV362	Metastasis pleural effusion	2.35	0	0	0.12	0
24	COV362	Metastasis pleural effusion	1682.5	6.36	0.04	0.01	0			24	COV362	Metastasis pleural effusion	10.388	0.011	0	0			24	COV362	Metastasis pleural effusion	1.787	0.059			24	COV362	Metastasis pleural effusion	15.86	0.28	0	0.05	0			24	COV362	Metastasis pleural effusion	2.88	0	0	0.75	0
24	COV362	Metastasis pleural effusion	2111.26	7.23	0.06	0.01	0			24	COV362	Metastasis pleural effusion	9.757	0.019	0	0			24	COV362	Metastasis pleural effusion	2.037	0.07			24	COV362	Metastasis pleural effusion	16.3	0.28	0	0.05	0			24	COV362	Metastasis pleural effusion	2.67	0	0	0.68	0
24	OVCAR3	Metastasis ascites 2	1530.53	0.72	0.01	0	0			24	OVCAR3	Metastasis ascites 2	17.913	0.008	0	0			24	OVCAR3	Metastasis ascites 2	1.68	0			24	OVCAR3	Metastasis ascites 2	18.22	0.39	0	0	0			24	OVCAR3	Metastasis ascites 2	3.02	0	0	0.18	0
24	OVCAR3	Metastasis ascites 2	1728.63	2.405	0.015	0.01	0			24	OVCAR3	Metastasis ascites 2	15.631	0.008	0.024	0			24	OVCAR3	Metastasis ascites 2	1.398	0.046			24	OVCAR3	Metastasis ascites 2	21.09	0.4	0	0	0			24	OVCAR3	Metastasis ascites 2	2.35	0	0	0.11	0
24	OVCAR3	Metastasis ascites 2	1899.59	2.26	0.01	0.01	0			24	OVCAR3	Metastasis ascites 2	18.544	0.012	0.011	0			24	OVCAR3	Metastasis ascites 2	0.78	0.026			24	OVCAR3	Metastasis ascites 2	16.88	0.45	0	0.03	0			24	OVCAR3	Metastasis ascites 2	3.02	0	0	0.25	0
24	OVCAR3	Metastasis ascites 2	1633.65	2.55	0.02	0.01	0			24	OVCAR3	Metastasis ascites 2	18.641	0.017	0.009	0			24	OVCAR3	Metastasis ascites 2	1.043	0.023			24	OVCAR3	Metastasis ascites 2	15.74	0.43	0	0.01	0			24	OVCAR3	Metastasis ascites 2	2.44	0	0	0.21	0
24	OVCAR3	Metastasis ascites 2	2065.13	4.44	0.01	0	0			24	OVCAR3	Metastasis ascites 2	25.971	0.026	0	0			24	OVCAR3	Metastasis ascites 2	1.007	0.02			24	OVCAR3	Metastasis ascites 2	18.29	0.35	0	0.02	0			24	OVCAR3	Metastasis ascites 2	3.25	0	0	0.28	0
24	OVCAR3	Metastasis ascites 2	1487.11	4.27	0.01	0.01	0			24	OVCAR3	Metastasis ascites 2	25.485	0.037	0	0			24	OVCAR3	Metastasis ascites 2	0.629	0.005			24	OVCAR3	Metastasis ascites 2	20.49	0.35	0	0.03	0			24	OVCAR3	Metastasis ascites 2	3.07	0	0	0.27	0
24	OVCAR4	Metastasis ascites 3	1970.15	3.33	0.04	0.01	0			24	OVCAR4	Metastasis ascites 3	17.063	0.068	0	0			24	OVCAR4	Metastasis ascites 3	1.061	0.107			24	OVCAR4	Metastasis ascites 3	16.74	0.85	0	0.13	0			24	OVCAR4	Metastasis ascites 3	1.88	0	0	0.44	0
24	OVCAR4	Metastasis ascites 3	1888.74	4.1	0.07	0.01	0			24	OVCAR4	Metastasis ascites 3	18.01	0.08	0	0			24	OVCAR4	Metastasis ascites 3	1.127	0.086			24	OVCAR4	Metastasis ascites 3	18.43	0.98	0	0.14	0			24	OVCAR4	Metastasis ascites 3	2.39	0	0	0.55	0
24	OVCAR4	Metastasis ascites 3	1918.05	4.95	0.04	0.02	0			24	OVCAR4	Metastasis ascites 3	17.718	0.023	0.008	0.001			24	OVCAR4	Metastasis ascites 3	1.659	0.062			24	OVCAR4	Metastasis ascites 3	17.66	0.69	0	0.07	0			24	OVCAR4	Metastasis ascites 3	2.84	0	0	0.32	0
24	OVCAR4	Metastasis ascites 3	2067.84	5.53	0.05	0.01	0			24	OVCAR4	Metastasis ascites 3	22.306	0.047	0.053	0.001			24	OVCAR4	Metastasis ascites 3	1.849	0.075			24	OVCAR4	Metastasis ascites 3	16.57	0.78	0	0.08	0			24	OVCAR4	Metastasis ascites 3	3	0	0	0.34	0
24	OVCAR4	Metastasis ascites 3	1465.4	3.93	0.03	0.01	0			24	OVCAR4	Metastasis ascites 3	19.636	0.023	0	0			24	OVCAR4	Metastasis ascites 3	1.434	0.023			24	OVCAR4	Metastasis ascites 3	16.64	0.27	0	0.01	0			24	OVCAR4	Metastasis ascites 3	2.28	0	0	0.07	0
24	OVCAR4	Metastasis ascites 3	1400.27	5.32	0.04	0.02	0			24	OVCAR4	Metastasis ascites 3	20.631	0.024	0	0.001			24	OVCAR4	Metastasis ascites 3	2.066	0.029			24	OVCAR4	Metastasis ascites 3	14.61	0.21	0	0.01	0			24	OVCAR4	Metastasis ascites 3	2.49	0	0	0.08	0
24	CAOV3	Primary OC	2024.69	4.34	0.29	0.02	0			24	CAOV3	Primary OC	5.922	0.509	0.022	0			24	CAOV3	Primary OC	1.009	0.055			24	CAOV3	Primary OC	18.47	0.79	0	0.14	0			24	CAOV3	Primary OC	2.44	0	0	0.64	0
24	CAOV3	Primary OC	2264.04	3.81	0.21	0.01	0			24	CAOV3	Primary OC	5.049	0.454	0.019	0			24	CAOV3	Primary OC	0.85	0.043			24	CAOV3	Primary OC	18.68	0.92	0	0.12	0			24	CAOV3	Primary OC	3.25	0	0	0.8	0
24	CAOV3	Primary OC	1953.87	4.88	0.49	0.03	0			24	CAOV3	Primary OC	6.456	0.991	0.074	0.001			24	CAOV3	Primary OC	1.489	0.066			24	CAOV3	Primary OC	15.16	0.52	0	0.13	0			24	CAOV3	Primary OC	1.96	0	0	0.84	0
24	CAOV3	Primary OC	1604.61	4.13	0.44	0.03	0			24	CAOV3	Primary OC	6.869	0.349	0.056	0			24	CAOV3	Primary OC	0.887	0.059			24	CAOV3	Primary OC	16.06	0.56	0	0.14	0			24	CAOV3	Primary OC	2.44	0	0	1.02	0
24	CAOV3	Primary OC	1494.71	3.23	0.5	0.02	0			24	CAOV3	Primary OC	6.383	0.336	0.073	0			24	CAOV3	Primary OC	0.657	0.042			24	CAOV3	Primary OC	15.42	0.49	0	0.13	0			24	CAOV3	Primary OC	2.1	0	0	0.85	0
24	CAOV3	Primary OC	1851.29	3.69	0.49	0.02	0			24	CAOV3	Primary OC	4.879	1.095	0.06	0			24	CAOV3	Primary OC	0.78	0.046			24	CAOV3	Primary OC	18.4	0.57	0	0.2	0			24	CAOV3	Primary OC	2.18	0	0	0.83	0
48	HIO-80	Control	1823.61	23.54	0.34	0.04	0			48	HIO-80	Control	11.481	0.3	0.015	0			48	HIO-80	Control	2.219	0.077			48	HIO-80	Control	12.04	0.15	0.01	0.01	0.01			48	HIO-80	Control	2.57	0	0	0.06	0
48	HIO-80	Control	1872.46	20.66	0.34	0.06	0			48	HIO-80	Control	12.063	0.289	0.032	0			48	HIO-80	Control	1.792	0.097			48	HIO-80	Control	13.68	0.12	0	0.01	0			48	HIO-80	Control	2.55	0	0	0.09	0
48	HIO-80	Control	1747.63	25	0.32	0.03	0			48	HIO-80	Control	13.058	0.31	0.002	0			48	HIO-80	Control	2.178	0.053			48	HIO-80	Control	18.5	0.29	0	0.02	0			48	HIO-80	Control	3.32	0	0	0.18	0
48	HIO-80	Control	1818.18	24.17	0.32	0.03	0			48	HIO-80	Control	16.748	0.344	0.003	0			48	HIO-80	Control	2.141	0.053			48	HIO-80	Control	18.06	0.43	0	0.02	0			48	HIO-80	Control	3.88	0	0	0.24	0
48	HIO-80	Control	1454.55	16.75	0.36	0	0			48	HIO-80	Control	13.835	0.626	0.008	0.009			48	HIO-80	Control	1.656	0.035			48	HIO-80	Control	16.85	0.3	0.01	0	0			48	HIO-80	Control	2.86	0	0	0.23	0
48	HIO-80	Control	1953.87	18.83	0.43	0	0			48	HIO-80	Control	13.083	0.48	0.005	0			48	HIO-80	Control	1.591	0.037			48	HIO-80	Control	16.46	0.33	0.01	0	0.01			48	HIO-80	Control	3.18	0	0	0.24	0
48	OVSAHO	Metastasis abdomen	1774.76	16.92	0.29	0.01	0			48	OVSAHO	Metastasis abdomen	4.005	0.092	0.006	0			48	OVSAHO	Metastasis abdomen	0.082	0.016			48	OVSAHO	Metastasis abdomen	9.72	3.76	0	2.06	0			48	OVSAHO	Metastasis abdomen	1.43	0.01	0.02	1.33	0
48	OVSAHO	Metastasis abdomen	1937.58	14.25	0.22	0.01	0			48	OVSAHO	Metastasis abdomen	3.18	0.097	0.009	0			48	OVSAHO	Metastasis abdomen	0.07	0.013			48	OVSAHO	Metastasis abdomen	10.67	3.9	0	2.02	0			48	OVSAHO	Metastasis abdomen	1.57	0.01	0.02	1.33	0
48	OVSAHO	Metastasis abdomen	2067.84	15.22	0.09	0.05	0			48	OVSAHO	Metastasis abdomen	4.296	0.098	0.003	0			48	OVSAHO	Metastasis abdomen	0.06	0.014			48	OVSAHO	Metastasis abdomen	9.81	3.72	0	1.59	0			48	OVSAHO	Metastasis abdomen	1.39	0.01	0.02	1.33	0
48	OVSAHO	Metastasis abdomen	2100.41	12.84	0.18	0.01	0			48	OVSAHO	Metastasis abdomen	4.636	0.112	0.03	0			48	OVSAHO	Metastasis abdomen	0.051	0.019			48	OVSAHO	Metastasis abdomen	10.74	4.21	0	1.84	0			48	OVSAHO	Metastasis abdomen	1.54	0	0.02	1.34	0
48	OVSAHO	Metastasis abdomen	1085.48	20	0.27	0.01	0			48	OVSAHO	Metastasis abdomen	3.204	0.086	0.005	0			48	OVSAHO	Metastasis abdomen	0.065	0.016			48	OVSAHO	Metastasis abdomen	7.89	4.97	0	2.66	0			48	OVSAHO	Metastasis abdomen	1.49	0.01	0.02	1.27	0
48	OVSAHO	Metastasis abdomen	1194.03	24.76	0.32	0.02	0			48	OVSAHO	Metastasis abdomen	4.442	0.125	0.01	0.005			48	OVSAHO	Metastasis abdomen	0.076	0.017			48	OVSAHO	Metastasis abdomen	9.21	6.23	0	3.31	0			48	OVSAHO	Metastasis abdomen	1.55	0	0.02	1.33	0
48	KURAMOCHI	Metastasis ascites 1	1668.93	13.01	0.07	0.01	0			48	KURAMOCHI	Metastasis ascites 1	15.437	0.069	0	0			48	KURAMOCHI	Metastasis ascites 1	0.897	0.037			48	KURAMOCHI	Metastasis ascites 1	3.86	13.49	0	3.86	0			48	KURAMOCHI	Metastasis ascites 1	2.11	0	0	0.79	0
48	KURAMOCHI	Metastasis ascites 1	2042.06	13.69	0.09	0.02	0			48	KURAMOCHI	Metastasis ascites 1	15.17	0.074	0	0			48	KURAMOCHI	Metastasis ascites 1	1.028	0.038			48	KURAMOCHI	Metastasis ascites 1	3.99	12.19	0	3.46	0			48	KURAMOCHI	Metastasis ascites 1	3.04	0	0	1	0
48	KURAMOCHI	Metastasis ascites 1	1675.71	17.28	0.07	0.01	0			48	KURAMOCHI	Metastasis ascites 1	19.126	0.13	0	0			48	KURAMOCHI	Metastasis ascites 1	0.829	0.062			48	KURAMOCHI	Metastasis ascites 1	2.98	13.97	0	4.55	0			48	KURAMOCHI	Metastasis ascites 1	1.64	0	0	0.98	0
48	KURAMOCHI	Metastasis ascites 1	1512.89	19.03	0.07	0.01	0			48	KURAMOCHI	Metastasis ascites 1	12.427	0.072	0	0			48	KURAMOCHI	Metastasis ascites 1	0.696	0.038			48	KURAMOCHI	Metastasis ascites 1	3.02	14.17	0	4.86	0			48	KURAMOCHI	Metastasis ascites 1	1.54	0	0	0.85	0
48	KURAMOCHI	Metastasis ascites 1	1797.83	17.77	0.07	0.01	0			48	KURAMOCHI	Metastasis ascites 1	12.84	0.059	0	0			48	KURAMOCHI	Metastasis ascites 1	1.046	0.046			48	KURAMOCHI	Metastasis ascites 1	3.58	14.17	0	4.07	0			48	KURAMOCHI	Metastasis ascites 1	2.74	0	0	1.23	0
48	KURAMOCHI	Metastasis ascites 1	1458.62	17.23	0.07	0.02	0			48	KURAMOCHI	Metastasis ascites 1	14.345	0.09	0	0			48	KURAMOCHI	Metastasis ascites 1	1.15	0.059			48	KURAMOCHI	Metastasis ascites 1	3.92	12.84	0	3.66	0			48	KURAMOCHI	Metastasis ascites 1	2.37	0.01	0	1.14	0
48	COV362	Metastasis pleural effusion	1535.96	18.2	0.1	0.01	0			48	COV362	Metastasis pleural effusion	9.539	0.051	0.043	0.016			48	COV362	Metastasis pleural effusion	1.612	0.143			48	COV362	Metastasis pleural effusion	15.86	1.25	0	0.1	0			48	COV362	Metastasis pleural effusion	2.44	0	0	0.9	0
48	COV362	Metastasis pleural effusion	1389.42	21.33	0.11	0.01	0			48	COV362	Metastasis pleural effusion	6.602	0.08	0.02	0.001			48	COV362	Metastasis pleural effusion	1.445	0.099			48	COV362	Metastasis pleural effusion	15.28	1.97	0.01	0.22	0			48	COV362	Metastasis pleural effusion	2.15	0	0	1.01	0
48	COV362	Metastasis pleural effusion	1905.02	16.5	0.03	0.01	0			48	COV362	Metastasis pleural effusion	7.282	0	0	0			48	COV362	Metastasis pleural effusion	1.669	0.061			48	COV362	Metastasis pleural effusion	11.71	0.32	0	0.1	0			48	COV362	Metastasis pleural effusion	2.56	0	0	0.4	0
48	COV362	Metastasis pleural effusion	1791.04	13.11	0.05	0.01	0			48	COV362	Metastasis pleural effusion	11.65	0	0	0			48	COV362	Metastasis pleural effusion	1.552	0.079			48	COV362	Metastasis pleural effusion	15.81	0.35	0	0.13	0			48	COV362	Metastasis pleural effusion	2.37	0	0.02	0.44	0
48	COV362	Metastasis pleural effusion	1937.58	14.34	0.06	0.02	0			48	COV362	Metastasis pleural effusion	6.359	0.028	0	0			48	COV362	Metastasis pleural effusion	1.335	0.087			48	COV362	Metastasis pleural effusion	16.06	0.57	0	0.21	0			48	COV362	Metastasis pleural effusion	2	0	0	1.42	0
48	COV362	Metastasis pleural effusion	1812.75	17.91	0.06	0.02	0			48	COV362	Metastasis pleural effusion	8.883	0.037	0	0			48	COV362	Metastasis pleural effusion	1.481	0.087			48	COV362	Metastasis pleural effusion	12.25	0.43	0	0.16	0			48	COV362	Metastasis pleural effusion	2.56	0	0	1.63	0
48	OVCAR3	Metastasis ascites 2	1747.63	5.83	0.19	0	0			48	OVCAR3	Metastasis ascites 2	13.35	0.014	0.054	0			48	OVCAR3	Metastasis ascites 2	0.344	0			48	OVCAR3	Metastasis ascites 2	18.33	0.61	0	0	0			48	OVCAR3	Metastasis ascites 2	2.06	0	0	0.53	0
48	OVCAR3	Metastasis ascites 2	1644.5	5.66	0.03	0	0			48	OVCAR3	Metastasis ascites 2	16.044	0.023	0.03	0			48	OVCAR3	Metastasis ascites 2	0.336	0			48	OVCAR3	Metastasis ascites 2	16.2	0.66	0	0	0			48	OVCAR3	Metastasis ascites 2	2	0	0	0.38	0
48	OVCAR3	Metastasis ascites 2	1622.8	7.65	0.01	0.01	0			48	OVCAR3	Metastasis ascites 2	17.767	0.019	0.016	0			48	OVCAR3	Metastasis ascites 2	0.173	0.011			48	OVCAR3	Metastasis ascites 2	11.44	0.56	0	0.11	0			48	OVCAR3	Metastasis ascites 2	1.84	0	0	0.43	0
48	OVCAR3	Metastasis ascites 2	1402.99	8.33	0.01	0.01	0			48	OVCAR3	Metastasis ascites 2	19.199	0.03	0.012	0			48	OVCAR3	Metastasis ascites 2	0.178	0.006			48	OVCAR3	Metastasis ascites 2	11.94	0.56	0	0.07	0			48	OVCAR3	Metastasis ascites 2	2.1	0	0	0.59	0
48	OVCAR3	Metastasis ascites 2	1763.91	9.13	0.01	0	0			48	OVCAR3	Metastasis ascites 2	21.408	0.04	0	0			48	OVCAR3	Metastasis ascites 2	0.177	0.008			48	OVCAR3	Metastasis ascites 2	17.27	0.64	0	0	0			48	OVCAR3	Metastasis ascites 2	2.6	0	0	0.41	0
48	OVCAR3	Metastasis ascites 2	1899.59	8.62	0.01	0	0			48	OVCAR3	Metastasis ascites 2	20.024	0.032	0	0			48	OVCAR3	Metastasis ascites 2	0.17	0			48	OVCAR3	Metastasis ascites 2	16.16	0.8	0	0.13	0			48	OVCAR3	Metastasis ascites 2	2.7	0	0	0.59	0
48	OVCAR4	Metastasis ascites 3	1970.15	11.53	0.04	0.02	0			48	OVCAR4	Metastasis ascites 3	17.015	0.08	0.013	0			48	OVCAR4	Metastasis ascites 3	0.822	0.106			48	OVCAR4	Metastasis ascites 3	18.08	0.72	0	0.18	0			48	OVCAR4	Metastasis ascites 3	1.48	0	0	0.69	0
48	OVCAR4	Metastasis ascites 3	1677.07	12.4	0.05	0.01	0			48	OVCAR4	Metastasis ascites 3	17.427	0.087	0.006	0			48	OVCAR4	Metastasis ascites 3	1.028	0.129			48	OVCAR4	Metastasis ascites 3	15.67	1.25	0	0.23	0			48	OVCAR4	Metastasis ascites 3	1.58	0	0	0.65	0
48	OVCAR4	Metastasis ascites 3	1735.69	11.21	0.07	0.02	0			48	OVCAR4	Metastasis ascites 3	15.728	0.055	0.006	0			48	OVCAR4	Metastasis ascites 3	0.814	0.064			48	OVCAR4	Metastasis ascites 3	16.06	1.46	0	0.26	0			48	OVCAR4	Metastasis ascites 3	2.51	0	0	0.71	0
48	OVCAR4	Metastasis ascites 3	1878.97	16.92	0.08	0.02	0			48	OVCAR4	Metastasis ascites 3	15.073	0.05	0.001	0			48	OVCAR4	Metastasis ascites 3	1.064	0.091			48	OVCAR4	Metastasis ascites 3	15.49	0.97	0	0.2	0			48	OVCAR4	Metastasis ascites 3	2.67	0	0	0.7	0
48	OVCAR4	Metastasis ascites 3	1530.53	11.24	0.05	0	0			48	OVCAR4	Metastasis ascites 3	18.398	0.028	0	0			48	OVCAR4	Metastasis ascites 3	1.789	0.074			48	OVCAR4	Metastasis ascites 3	15.25	0.59	0	0.03	0			48	OVCAR4	Metastasis ascites 3	2.81	0	0	0.34	0
48	OVCAR4	Metastasis ascites 3	1416.55	12.89	0.03	0.01	0			48	OVCAR4	Metastasis ascites 3	15.097	0.032	0	0			48	OVCAR4	Metastasis ascites 3	1.643	0.051			48	OVCAR4	Metastasis ascites 3	18.54	0.61	0	0.04	0			48	OVCAR4	Metastasis ascites 3	3.9	0	0	0.44	0
48	CAOV3	Primary OC	1778.02	14.115	0.96	0.08	0			48	CAOV3	Primary OC	2.418	0.4	0.112	0.001			48	CAOV3	Primary OC	0.271	0.04			48	CAOV3	Primary OC	14.86	0.59	0	0.28	0			48	CAOV3	Primary OC	1.79	0	0	1.52	0
48	CAOV3	Primary OC	1641.25	12.985	1.115	0.1	0			48	CAOV3	Primary OC	2.36	0.5	0.121	0.002			48	CAOV3	Primary OC	0.234	0.035			48	CAOV3	Primary OC	14.23	0.78	0	0.51	0			48	CAOV3	Primary OC	1.48	0	0	1.85	0
48	CAOV3	Primary OC	1714.52	12.82	0.85	0.07	0			48	CAOV3	Primary OC	2.476	0.728	0.102	0.001			48	CAOV3	Primary OC	0.308	0.046			48	CAOV3	Primary OC	14.88	0.58	0	0.28	0			48	CAOV3	Primary OC	1.97	0	0	1.59	0
48	CAOV3	Primary OC	1807.33	15.41	1.07	0.09	0			48	CAOV3	Primary OC	3.325	1.001	0.13	0.001			48	CAOV3	Primary OC	0.305	0.053			48	CAOV3	Primary OC	14.84	0.59	0	0.28	0			48	CAOV3	Primary OC	1.6	0	0	1.44	0
48	CAOV3	Primary OC	1863.5	11.89	0.96	0.09	0			48	CAOV3	Primary OC	2.221	0.85	0.121	0.002			48	CAOV3	Primary OC	0.178	0.026			48	CAOV3	Primary OC	13.73	0.7	0	0.46	0			48	CAOV3	Primary OC	1.53	0	0	1.92	0
48	CAOV3	Primary OC	2022.25	14.08	1.27	0.11	0			48	CAOV3	Primary OC	2.5	0.882	0.122	0.002			48	CAOV3	Primary OC	0.289	0.044			48	CAOV3	Primary OC	14.72	0.85	0	0.55	0			48	CAOV3	Primary OC	1.43	0	0	1.77	0
72	HIO-80	Control	1671.64	32.52	0.41	0.05	0			72	HIO-80	Control	9.515	0.4	0.027	0			72	HIO-80	Control	1.419	0.092			72	HIO-80	Control	16.13	0.2	0.01	0.02	0			72	HIO-80	Control	3.47	0	0	0.2	0
72	HIO-80	Control	1649.93	25.73	0.44	0.08	0			72	HIO-80	Control	12.476	0.459	0.035	0			72	HIO-80	Control	1.544	0.109			72	HIO-80	Control	13.45	0.23	0.04	0.04	0			72	HIO-80	Control	2.52	0	0	0.21	0
72	HIO-80	Control	1682.5	47.57	0.48	0.04	0			72	HIO-80	Control	13.738	0.475	0.011	0			72	HIO-80	Control	1.998	0.073			72	HIO-80	Control	12.59	0.25	0	0.02	0			72	HIO-80	Control	2.25	0	0	0.38	0
72	HIO-80	Control	1633.65	39.81	0.51	0.04	0			72	HIO-80	Control	15.024	0.506	0.012	0			72	HIO-80	Control	2.039	0.087			72	HIO-80	Control	15.09	0.3	0	0.02	0			72	HIO-80	Control	2.91	0	0	0.19	0
72	HIO-80	Control	1791.04	26.46	0.66	0.04	0			72	HIO-80	Control	12.937	0.772	0.026	0.002			72	HIO-80	Control	1.729	0.054			72	HIO-80	Control	12.01	0.79	0.03	0.08	0.02			72	HIO-80	Control	2.63	0	0	0.44	0
72	HIO-80	Control	1899.59	25.73	0.69	0.03	0			72	HIO-80	Control	12.67	0.67	0.019	0.003			72	HIO-80	Control	1.88	0.051			72	HIO-80	Control	14.86	0.68	0.03	0.09	0.01			72	HIO-80	Control	2.51	0	0	0.47	0
72	OVSAHO	Metastasis abdomen	1731.34	31.07	0.29	0.03	0			72	OVSAHO	Metastasis abdomen	2.087	0.092	0.018	0			72	OVSAHO	Metastasis abdomen	0.012	0.009			72	OVSAHO	Metastasis abdomen	9.88	3.97	0	3.91	0			72	OVSAHO	Metastasis abdomen	0.97	0	0.03	2.31	0
72	OVSAHO	Metastasis abdomen	1606.51	29.61	0.16	0.03	0			72	OVSAHO	Metastasis abdomen	2.318	0.086	0.016	0			72	OVSAHO	Metastasis abdomen	0.006	0.004			72	OVSAHO	Metastasis abdomen	10.69	3.83	0	3.94	0			72	OVSAHO	Metastasis abdomen	0.97	0	0.03	1.93	0
72	OVSAHO	Metastasis abdomen	1937.58	38.59	0.2	0.04	0			72	OVSAHO	Metastasis abdomen	2.67	0.111	0.024	0			72	OVSAHO	Metastasis abdomen	0.015	0.009			72	OVSAHO	Metastasis abdomen	9.75	3.53	0	3.7	0			72	OVSAHO	Metastasis abdomen	0.93	0	0.03	2.26	0
72	OVSAHO	Metastasis abdomen	2100.41	34.71	0.3	0.035	0			72	OVSAHO	Metastasis abdomen	2.67	0.12	0.023	0			72	OVSAHO	Metastasis abdomen	0.013	0.01			72	OVSAHO	Metastasis abdomen	9.77	3.44	0	3.91	0			72	OVSAHO	Metastasis abdomen	0.87	0	0.03	1.77	0
72	OVSAHO	Metastasis abdomen	1286.3	34.95	0.28	0.03	0			72	OVSAHO	Metastasis abdomen	2.129	0.101	0.017	0			72	OVSAHO	Metastasis abdomen	0.016	0.009			72	OVSAHO	Metastasis abdomen	6.62	4.65	0	4.58	0			72	OVSAHO	Metastasis abdomen	0.91	0	0.02	1.54	0
72	OVSAHO	Metastasis abdomen	1405.7	42.72	0.11	0.035	0			72	OVSAHO	Metastasis abdomen	2.427	0.111	0.02	0.005			72	OVSAHO	Metastasis abdomen	0.021	0.009			72	OVSAHO	Metastasis abdomen	7.31	5.21	0	4.93	0			72	OVSAHO	Metastasis abdomen	0.99	0.01	0.02	1.65	0
72	KURAMOCHI	Metastasis ascites 1	1818.18	30.24	0.12	0.02	0			72	KURAMOCHI	Metastasis ascites 1	13.617	0.102	0.002	0			72	KURAMOCHI	Metastasis ascites 1	0.665	0.05			72	KURAMOCHI	Metastasis ascites 1	1.51	9.71	0	7.37	0			72	KURAMOCHI	Metastasis ascites 1	1.74	0	0	1.42	0
72	KURAMOCHI	Metastasis ascites 1	1458.62	25.46	0.11	0.02	0			72	KURAMOCHI	Metastasis ascites 1	12.985	0.09	0.002	0			72	KURAMOCHI	Metastasis ascites 1	0.72	0.054			72	KURAMOCHI	Metastasis ascites 1	2.6	9.11	0	7.27	0			72	KURAMOCHI	Metastasis ascites 1	2.04	0	0	1.58	0
72	KURAMOCHI	Metastasis ascites 1	1648.58	33.79	0.12	0.01	0			72	KURAMOCHI	Metastasis ascites 1	12.743	0.09	0.01	0			72	KURAMOCHI	Metastasis ascites 1	0.908	0.061			72	KURAMOCHI	Metastasis ascites 1	2.98	10.32	0	4.75	0			72	KURAMOCHI	Metastasis ascites 1	1.82	0.01	0	1.31	0
72	KURAMOCHI	Metastasis ascites 1	1723.2	34	0.1	0.02	0			72	KURAMOCHI	Metastasis ascites 1	14.757	0.091	0	0			72	KURAMOCHI	Metastasis ascites 1	1.325	0.094			72	KURAMOCHI	Metastasis ascites 1	3.08	10.64	0	5.36	0			72	KURAMOCHI	Metastasis ascites 1	1.93	0	0	1.39	0
72	KURAMOCHI	Metastasis ascites 1	1709.63	46.7	0.12	0.02	0			72	KURAMOCHI	Metastasis ascites 1	11.845	0.082	0	0			72	KURAMOCHI	Metastasis ascites 1	0.902	0.066			72	KURAMOCHI	Metastasis ascites 1	2.22	11.04	0	6.19	0			72	KURAMOCHI	Metastasis ascites 1	1.93	0.01	0	2.11	0
72	KURAMOCHI	Metastasis ascites 1	1560.38	36.94	0.1	0.02	0			72	KURAMOCHI	Metastasis ascites 1	11.335	0.07	0.005	0			72	KURAMOCHI	Metastasis ascites 1	0.845	0.067			72	KURAMOCHI	Metastasis ascites 1	2.24	9.85	0	6.28	0			72	KURAMOCHI	Metastasis ascites 1	2.51	0.01	0	1.39	0
72	COV362	Metastasis pleural effusion	1519.67	23.11	0.18	0.02	0			72	COV362	Metastasis pleural effusion	11.481	0.062	0.013	0.031			72	COV362	Metastasis pleural effusion	0.683	0.136			72	COV362	Metastasis pleural effusion	15.63	1.2	0	0.55	0			72	COV362	Metastasis pleural effusion	1.97	0	0	1.22	0
72	COV362	Metastasis pleural effusion	1356.85	25.97	0.13	0.02	0			72	COV362	Metastasis pleural effusion	7.864	0.001	0	0.029			72	COV362	Metastasis pleural effusion	0.383	0.13			72	COV362	Metastasis pleural effusion	17.15	1.85	0	0.82	0			72	COV362	Metastasis pleural effusion	2.02	0	0	1.03	0
72	COV362	Metastasis pleural effusion	1829.04	23.54	0.05	0.01	0			72	COV362	Metastasis pleural effusion	8.252	0.002	0	0.02			72	COV362	Metastasis pleural effusion	0.647	0.069			72	COV362	Metastasis pleural effusion	14.1	0.54	0	0.28	0			72	COV362	Metastasis pleural effusion	1.8	0	0.01	1.01	0
72	COV362	Metastasis pleural effusion	1687.92	25.49	0.07	0.01	0			72	COV362	Metastasis pleural effusion	7.476	0	0	0			72	COV362	Metastasis pleural effusion	0.605	0.088			72	COV362	Metastasis pleural effusion	12.55	0.51	0	0.29	0			72	COV362	Metastasis pleural effusion	1.3	0	0	1.35	0
72	COV362	Metastasis pleural effusion	1877.88	27.67	0.09	0.02	0			72	COV362	Metastasis pleural effusion	8.374	0.053	0.003	0			72	COV362	Metastasis pleural effusion	0.696	0.095			72	COV362	Metastasis pleural effusion	15.65	0.89	0	0.57	0			72	COV362	Metastasis pleural effusion	1.48	0	0	1.69	0
72	COV362	Metastasis pleural effusion	1747.63	26.94	0.09	0.02	0			72	COV362	Metastasis pleural effusion	7.597	0.065	0	0			72	COV362	Metastasis pleural effusion	0.733	0.111			72	COV362	Metastasis pleural effusion	15.81	0.83	0	0.56	0			72	COV362	Metastasis pleural effusion	1.45	0	0	1.89	0
72	OVCAR3	Metastasis ascites 2	1370.42	9.83	0.03	0	0			72	OVCAR3	Metastasis ascites 2	14.126	0.031	0.003	0			72	OVCAR3	Metastasis ascites 2	0.173	0			72	OVCAR3	Metastasis ascites 2	15.37	0.83	0	0	0			72	OVCAR3	Metastasis ascites 2	2.7	0	0	0.74	0
72	OVCAR3	Metastasis ascites 2	1818.18	10.51	0.03	0	0			72	OVCAR3	Metastasis ascites 2	15.607	0.027	0.003	0			72	OVCAR3	Metastasis ascites 2	0.115	0.005			72	OVCAR3	Metastasis ascites 2	15.51	0.74	0	0	0			72	OVCAR3	Metastasis ascites 2	1.59	0	0	0.72	0
72	OVCAR3	Metastasis ascites 2	1668.93	13.33	0.03	0	0			72	OVCAR3	Metastasis ascites 2	16.893	0.03	0.011	0			72	OVCAR3	Metastasis ascites 2	0.067	0.014			72	OVCAR3	Metastasis ascites 2	11.13	0.73	0	0.18	0			72	OVCAR3	Metastasis ascites 2	1.94	0	0	0.84	0
72	OVCAR3	Metastasis ascites 2	1606.51	17.65	0.04	0.02	0			72	OVCAR3	Metastasis ascites 2	15.85	0.026	0.012	0			72	OVCAR3	Metastasis ascites 2	0.052	0.012			72	OVCAR3	Metastasis ascites 2	13.77	0.9	0	0.26	0			72	OVCAR3	Metastasis ascites 2	1.98	0	0	0.87	0
72	OVCAR3	Metastasis ascites 2	2035.28	16.02	0.03	0	0			72	OVCAR3	Metastasis ascites 2	19.66	0.028	0	0			72	OVCAR3	Metastasis ascites 2	0.03	0.002			72	OVCAR3	Metastasis ascites 2	11.5	0.77	0	0.25	0			72	OVCAR3	Metastasis ascites 2	1.65	0	0	0.84	0
72	OVCAR3	Metastasis ascites 2	1478.97	15.19	0.02	0	0			72	OVCAR3	Metastasis ascites 2	16.675	0.033	0	0			72	OVCAR3	Metastasis ascites 2	0.023	0.002			72	OVCAR3	Metastasis ascites 2	13.56	0.94	0	0.32	0			72	OVCAR3	Metastasis ascites 2	1.83	0	0	1.06	0
72	OVCAR4	Metastasis ascites 3	1644.5	25.39	0.07	0.02	0			72	OVCAR4	Metastasis ascites 3	13.18	0.081	0	0			72	OVCAR4	Metastasis ascites 3	1.57	0.069			72	OVCAR4	Metastasis ascites 3	17.08	0.43	0	0.04	0			72	OVCAR4	Metastasis ascites 3	2	0	0	0.2	0
72	OVCAR4	Metastasis ascites 3	1791.04	31.31	0.08	0.02	0			72	OVCAR4	Metastasis ascites 3	21.262	0.051	0.002	0			72	OVCAR4	Metastasis ascites 3	1.557	0.062			72	OVCAR4	Metastasis ascites 3	16.78	0.37	0	0.04	0			72	OVCAR4	Metastasis ascites 3	1.42	0	0	0.16	0
72	OVCAR4	Metastasis ascites 3	1641.25	27.09	0.04	0.01	0			72	OVCAR4	Metastasis ascites 3	8.883	0.013	0.003	0			72	OVCAR4	Metastasis ascites 3	0.386	0.075			72	OVCAR4	Metastasis ascites 3	13.7	1.56	0	0.52	0			72	OVCAR4	Metastasis ascites 3	2.53	0	0	1.2	0
72	OVCAR4	Metastasis ascites 3	1764.99	19.32	0.07	0.01	0			72	OVCAR4	Metastasis ascites 3	13.204	0.037	0.007	0			72	OVCAR4	Metastasis ascites 3	0.383	0.079			72	OVCAR4	Metastasis ascites 3	17.13	2.08	0	0.6	0			72	OVCAR4	Metastasis ascites 3	2.35	0	0	1.11	0
72	OVCAR4	Metastasis ascites 3	1546.81	23.74	0.05	0.02	0			72	OVCAR4	Metastasis ascites 3	16.408	0.175	0.041	0			72	OVCAR4	Metastasis ascites 3	0.913	0.078			72	OVCAR4	Metastasis ascites 3	16.93	0.4	0	0.04	0			72	OVCAR4	Metastasis ascites 3	2.86	0	0	0.55	0
72	OVCAR4	Metastasis ascites 3	1416.55	26.33	0.06	0	0			72	OVCAR4	Metastasis ascites 3	14.806	0.09	0.063	0.001			72	OVCAR4	Metastasis ascites 3	0.012	0.015			72	OVCAR4	Metastasis ascites 3	19.65	1.29	0	0.18	0			72	OVCAR4	Metastasis ascites 3	2.91	0	0	0.52	0
72	CAOV3	Primary OC	1846.4	15.24	0.5	0.05	0			72	CAOV3	Primary OC	0.277	0.62	0.023	0.001			72	CAOV3	Primary OC	0.062	0.017			72	CAOV3	Primary OC	13.26	1.15	0	0.83	0			72	CAOV3	Primary OC	1.3	0	0	2.03	0
72	CAOV3	Primary OC	1782.9	17.96	0.55	0.08	0			72	CAOV3	Primary OC	0.573	0.557	0.028	0.001			72	CAOV3	Primary OC	0.061	0.024			72	CAOV3	Primary OC	14.79	1.25	0	0.91	0			72	CAOV3	Primary OC	1.39	0	0	2.19	0
72	CAOV3	Primary OC	1690.09	19.15	1.1	0.12	0			72	CAOV3	Primary OC	0.84	0.399	0.05	0.002			72	CAOV3	Primary OC	0.093	0.041			72	CAOV3	Primary OC	15.25	0.81	0	0.78	0			72	CAOV3	Primary OC	0.99	0	0	2.2	0
72	CAOV3	Primary OC	1751.15	16.41	0.94	0.11	0			72	CAOV3	Primary OC	0.854	0.472	0.06	0.003			72	CAOV3	Primary OC	0.121	0.041			72	CAOV3	Primary OC	15.72	0.81	0.01	0.77	0			72	CAOV3	Primary OC	1.03	0	0	2.2	0
72	CAOV3	Primary OC	1431.21	13.25	0.96	0.12	0			72	CAOV3	Primary OC	0.519	0.72	0.056	0.003			72	CAOV3	Primary OC	0.043	0.026			72	CAOV3	Primary OC	11.04	0.69	0	0.67	0			72	CAOV3	Primary OC	0.95	0.01	0	2.09	0
72	CAOV3	Primary OC	1646.13	14.71	1.15	0.15	0			72	CAOV3	Primary OC	0.468	0.6	0.07	0.003			72	CAOV3	Primary OC	0.079	0.03			72	CAOV3	Primary OC	12.18	0.8	0.01	0.74	0			72	CAOV3	Primary OC	1	0	0	2.06	0

## Sheet: Supplementary_Table_2
10 nM T vs control 72h						10 nM 11KT vs control 72h						10 nM DHT vs control 72h						10 nM 11KDHT vs control 72h
Gene name	log2 Fold Change	P value	P adj value			Gene name	log2 Fold Change	P value	P adj value			Gene name	log2 Fold Change	P value	P adj value			Gene name	log2 Fold Change	P value	P adj value
CAPN6	2.21133	5.30648e-128	8.60021e-124			UCHL1	1.33794	0	0			CAPN6	2.31045	3.11852e-304	7.53589e-300			DHRS2	2.33946	9.4223e-221	1.91866e-216
ALPP	5.79518	1.22884e-127	9.95792e-124			TM4SF1	1.33039	0	0			DHRS2	2.22102	4.39367e-205	5.30865e-201			SAT1	1.29265	4.41271e-202	4.4928e-198
ZNF826P	2.64835	1.00742e-92	5.44243e-89			NAP1L2	2.35334	6.42e-278	4.99e-274			NAP1L2	2.04078	2.36457e-204	1.90466e-200			UCHL1	1.25098	1.68073e-190	1.14082e-186
ENC1	-1.7223	3.95067e-63	1.60071e-59			SAT1	1.46187	1.41e-254	8.19e-251			SAT1	1.22851	4.17268e-196	2.52082e-192			CAPN6	1.93934	2.79827e-176	1.42453e-172
SCGB1D2	3.09337	2.56718e-58	8.32127e-55			DHRS2	2.19594	3.38e-243	1.58e-239			PDK4	1.50849	7.15348e-177	3.45728e-173			NAP1L2	2.09847	3.52192e-171	1.43434e-167
ID1	-1.54016	3.09233e-49	8.35289e-46			SDE2	1.27228	2.65e-206	1.03e-202			CTGF	1.93689	3.49398e-149	1.4072e-145			GADD45A	1.21947	3.80437e-145	1.29114e-141
CA12	3.54225	2.7628e-45	6.39667e-42			FAM219A	1.36646	2.56e-202	8.53e-199			PRSS23	1.17127	2.13877e-136	7.38333e-133			TM4SF1	1.05148	1.10511e-141	3.21476e-138
PRSS23	1.01755	2.80216e-42	5.67683e-39			CXCL8	3.21356	2.47e-182	7.2e-179			CCNA1	1.47347	1.43051e-134	4.32105e-131			CHGA	1.86142	1.27291e-127	3.24004e-124
BBOX1	-1.52697	9.99765e-41	1.80035e-37			GADD45A	1.32139	2.17e-176	5.62e-173			ENC1	-1.6114	1.84964e-127	4.96629e-124			CCNA1	1.431	4.35793e-125	9.86006e-122
AJAP1	-1.22987	1.23448e-39	1.96486e-36			CTGF	2.00432	1.26e-172	2.95e-169			ZNF826P	2.28488	1.06241e-120	2.56732e-117			HSPA5	0.836897	1.08849e-120	2.21648e-117
FRMD4B	1.67395	1.33359e-39	1.96486e-36			PARP14	0.879367	1.72e-153	3.65e-150			ID1	-1.53603	6.84108e-113	1.50286e-109			CTGF	1.89773	1.46286e-120	2.70802e-117
DEPTOR	1.75985	1.68488e-39	2.27557e-36			CHGA	1.79849	7.65e-149	1.49e-145			DUSP13	1.93728	2.31672e-109	4.6653e-106			H3F3B	0.849341	2.56454e-119	4.3518e-116
CAPN9	1.26449	4.49699e-39	5.60637e-36			H3F3B	0.898966	8.45e-148	1.51e-144			FAM219A	1.20826	8.64829e-109	1.60758e-105			ID1	-1.41249	9.7126e-110	1.52137e-106
TSPAN1	-1.11431	2.70956e-37	3.1367e-34			OSGIN1	2.08243	2.35e-147	3.92e-144			CHGA	1.70975	6.07859e-108	1.04921e-104			OSGIN1	2.10736	1.77013e-109	2.57465e-106
CLIC5	-0.9754	7.6962e-37	8.31549e-34			TTLL7	1.43197	1.02e-139	1.59e-136			TCIM	1.90108	5.54025e-105	8.92534e-102			FAM219A	1.21324	4.23665e-99	5.75139e-96
CDH23	1.75653	2.54074e-35	2.57361e-32			CCNA1	1.41776	1.68e-139	2.44e-136			TM4SF1	0.894856	4.74821e-102	7.17129e-99			ATF3	1.45026	1.9005e-95	2.41875e-92
LRRC41	0.914343	8.53328e-35	8.13523e-32			MAFG	0.987166	3.28e-137	4.5e-134			GADD45A	1.07973	1.77013e-100	2.51619e-97			PRSS23	0.943774	3.65146e-93	4.37381e-90
THSD4	1.35567	7.58877e-34	6.83284e-31			GPX3	1.24467	4.59e-137	5.94e-134			NRCAM	1.89378	3.69204e-100	4.95656e-97			FXR2	0.901935	1.89579e-89	2.14466e-86
NR2F1	-1.14352	2.04419e-32	1.74369e-29			DUSP13	2.0561	2.76e-129	3.38e-126			CTTNBP2	1.31079	4.47221e-98	5.68795e-95			SLC3A2	0.914314	2.53374e-89	2.7155e-86
NRCAM	1.4403	7.46188e-31	6.04674e-28			ATF3	1.64831	1.08e-128	1.26e-125			CXCL8	2.54749	8.94157e-96	1.08037e-92			SDE2	1.12549	2.99691e-89	3.0513e-86
CD200	1.32591	1.98007e-30	1.52814e-27			SLC1A5	0.853621	7.23e-124	8.03e-121			CTH	1.40674	7.6985e-95	8.85877e-92			DUSP13	2.0093	1.00712e-88	9.76568e-86
CCDC146	1.02552	4.08149e-29	3.00676e-26			PSMB3	0.80116	2.52e-123	2.67e-120			UCHL1	1.16745	6.19938e-94	6.80946e-91			PDK4	1.29169	1.57026e-88	1.45342e-85
EPB41L2	0.889488	1.36104e-28	9.5906e-26			ANXA1	0.873536	1.05e-116	1.07e-113			FRMD4B	2.01942	1.06325e-93	1.11711e-90			PARP14	0.776836	6.46809e-86	5.72651e-83
UGT2B7	1.05463	4.44117e-28	2.99909e-25			HYOU1	0.707449	9.62e-116	9.34e-113			ATF3	1.34453	1.8142e-93	1.82667e-90			ENC1	-1.44272	9.74417e-86	8.26752e-83
SOX6	2.07139	2.20591e-27	1.43005e-24			RIT1	1.0986	1.69e-113	1.57e-110			OSGIN1	1.92405	1.36408e-87	1.31852e-84			MAFG	0.904311	6.17995e-84	5.03369e-81
FKBP5	1.60121	2.81115e-27	1.75232e-24			CTH	1.52753	3.48e-110	3.12e-107			SPP1	2.74724	1.24937e-86	1.1612e-83			CTH	1.4098	4.69351e-83	3.67592e-80
TDO2	3.6982	3.77832e-27	2.26797e-24			ZNF121	0.981326	1.05e-108	9.05e-106			SDE2	0.978302	4.90791e-86	4.39258e-83			GPX3	1.10114	1.93541e-82	1.45966e-79
CHGA	1.26778	1.18482e-26	6.858e-24			PPP1R15A	1.16338	3e-107	2.49e-104			UNC5B	1.07162	1.56496e-82	1.35062e-79			ZNF826P	1.99948	2.82903e-82	2.05741e-79
LIPG	1.71578	1.98619e-26	1.11001e-23			ZFAND2A	1.07949	6.23e-106	5.01e-103			SLC20A1	1.02298	1.8444e-82	1.53689e-79			SLC20A1	1.05656	4.44478e-79	3.121e-76
HSD11B1	5.16775	2.14437e-26	1.15846e-23			PPP1R15B	0.880607	1.17e-105	9.12e-103			HSPA5	0.766715	2.3635e-81	1.9038e-78			PPP1R15A	1.09801	3.9108e-78	2.65452e-75
CPA4	-0.986127	2.2359e-25	1.16894e-22			PDK4	1.13854	1.29e-104	9.72e-102			THSD4	1.54692	6.2055e-80	4.83729e-77			CXCL8	2.62429	8.06976e-78	5.30079e-75
NXNL2	1.31332	5.22884e-25	2.64824e-22			SLC3A2	0.926042	2.36e-104	1.72e-101			H3F3B	0.73854	2.03836e-79	1.53928e-76			FOSL1	1.98531	3.39826e-77	2.16246e-74
POU5F1	1.34357	3.24557e-24	1.59397e-21			SLC7A11	2.03708	1.86e-102	1.31e-99			GDF11	-0.883475	9.21585e-78	6.74852e-75			NPC1	0.813924	9.94552e-73	6.13699e-70
ARL4C	-0.883626	6.10868e-24	2.91187e-21			GLA	0.928592	2.06e-101	1.41e-98			NR2F1	-1.29693	9.04307e-75	6.42723e-72			HYOU1	0.770441	4.12801e-72	2.47231e-69
CTTNBP2	0.942472	6.88865e-24	3.18984e-21			ATP6V0A1	0.886977	8.79e-101	5.83e-98			CD55	1.11741	2.37064e-72	1.63676e-69			RIT1	0.938619	6.95289e-70	4.04519e-67
PRKX	0.89804	2.91952e-23	1.31435e-20			CD55	1.34719	9.01e-101	5.83e-98			GPX3	1.09525	3.40134e-71	2.28315e-68			PI3	1.83349	2.05826e-68	1.16423e-65
ASRGL1	1.10474	3.7355e-23	1.63625e-20			FOSL1	2.09843	2.67e-100	1.69e-97			SCGB1D2	3.02071	5.74513e-71	3.75219e-68			AIF1L	-0.816572	3.09347e-68	1.7025e-65
AOC1	-1.77542	6.33041e-23	2.69992e-20			SLC20A1	1.04269	3.18e-100	1.95e-97			CCDC146	0.929919	2.27502e-70	1.44673e-67			DNAJB1	0.680032	4.83805e-68	2.59256e-65
CCNA1	0.862603	1.93355e-22	8.03512e-20			NPC1	0.822314	4.63e-99	2.77e-96			FKBP5	1.80207	2.48046e-70	1.53693e-67			POLR3A	0.703441	5.8266e-68	3.04223e-65
SLC15A2	1.16284	2.50609e-22	1.01541e-19			SELENOK	1.03994	6.41e-94	3.74e-91			NPC1	0.753625	1.31781e-69	7.9612e-67			GDF15	1.54198	9.28296e-68	4.72572e-65
MAL	-0.845383	3.04327e-22	1.20298e-19			DDIT3	1.25782	2.22e-93	1.26e-90			SDC3	-0.834094	3.33453e-68	1.96534e-65			PELO	0.93275	3.46642e-67	1.72163e-64
SCGB2A1	6.02398	7.47381e-22	2.884e-19			ID1	-1.24935	1.2e-92	6.64e-90			ANXA1	0.701681	1.07082e-66	6.16104e-64			TCIM	1.7701	8.02134e-67	3.88901e-64
RARRES3	1.03828	7.67384e-22	2.89232e-19			AIF1L	-0.813377	3.2e-92	1.73e-89			AIF1L	-0.763671	2.26658e-66	1.27377e-63			BAG3	0.799169	2.05406e-65	9.72718e-63
WNT10A	-1.41369	5.5639e-21	2.04941e-18			CAPN6	1.34945	8.4e-92	4.45e-89			ATP6V0A1	0.829264	4.39331e-65	2.41283e-62			CD55	1.19132	3.65889e-65	1.69332e-62
EYA2	0.952472	3.67049e-20	1.32195e-17			FXR2	0.920103	1.41e-91	7.33e-89			FXR2	0.841655	6.7433e-65	3.62115e-62			SLC1A5	0.79412	5.45548e-63	2.46866e-60
ZNF467	-1.34182	4.73128e-20	1.66696e-17			QPRT	-0.803761	8.43e-91	4.27e-88			PPP1R15A	1.02507	2.31786e-64	1.21763e-61			ANXA1	0.729607	4.62966e-62	2.04943e-59
PSORS1C3	1.15173	1.18309e-19	4.07964e-17			CRY2	1.20899	4.15e-90	2.06e-87			CDH23	1.78573	8.06159e-64	4.14486e-61			RGS2	1.4782	2.06642e-61	8.95287e-59
DHRS3	1.32694	1.37946e-19	4.65767e-17			TXNRD1	0.750714	1.89e-89	9.19e-87			PI3	1.62657	2.5374e-63	1.27742e-60			GLA	0.865625	4.36403e-61	1.85135e-58
ATOH8	-1.82455	3.11254e-19	1.02949e-16			ENC1	-1.25863	8.31e-89	3.96e-86			RGS2	1.40411	2.93025e-63	1.44509e-60			ATP6V0A1	0.872583	1.29225e-60	5.37024e-58
DCAF12L2	1.02413	8.2653e-19	2.67911e-16			POLR3A	0.678029	4.67e-88	2.18e-85			RIT1	0.847193	3.02299e-63	1.46101e-60			SELENOK	1.01336	1.68372e-60	6.85713e-58
AKR1C3	1.50329	1.02259e-18	3.24963e-16			PELO	0.931576	1.77e-87	8.1e-85			SLC1A3	-1.02358	3.89304e-63	1.84461e-60			FRMD4B	1.82504	8.39259e-60	3.35095e-57
ADAMTS5	-1.01334	2.61178e-18	8.14021e-16			GCLM	0.923594	4.37e-87	1.96e-84			RARRES3	1.21195	1.1401e-62	5.29816e-60			TTLL7	1.28865	2.32816e-59	9.11698e-57
MC4R	3.57173	5.20547e-18	1.59179e-15			RNF187	-0.983443	4.76e-87	2.09e-84			FOSL1	1.89126	2.12027e-62	9.66724e-60			SPP1	2.63	6.43592e-59	2.47273e-56
ST6GALNAC1	1.03579	5.74057e-18	1.72292e-15			PI3	1.81847	7.54e-87	3.26e-84			PLPP3	-0.694933	3.23041e-62	1.44561e-59			RARRES3	1.16225	1.60744e-58	6.06155e-56
LEMD1	-1.42562	6.69228e-18	1.95265e-15			SPP1	2.78976	2.49e-85	1.06e-82			MLLT11	1.45756	1.25264e-61	5.50365e-59			NEU1	0.846092	1.61209e-56	5.96854e-54
ALPG	4.50833	6.74697e-18	1.95265e-15			BMP7	-0.737146	2.9e-85	1.21e-82			LHX1	-1.12387	2.56659e-61	1.10753e-58			CTTNBP2	1.11751	8.61145e-56	3.13134e-53
SPARC	-1.43513	7.27957e-18	2.06982e-15			OSER1	0.792614	1.08e-84	4.42e-82			SOX6	2.31886	3.86664e-59	1.63925e-56			ZFAND2A	0.957375	1.30243e-55	4.65288e-53
CERNA2	0.855139	1.13919e-17	3.18326e-15			GOLGA3	0.729869	1.13e-84	4.52e-82			MIR22HG	1.01045	6.20758e-57	2.58631e-54			SDC3	-0.823083	1.97425e-55	6.93133e-53
LINC01127	-0.862184	1.46848e-17	4.03383e-15			SDC3	-0.772228	6.89e-84	2.72e-81			PARP14	0.712814	6.61828e-57	2.71069e-54			GDF11	-0.818679	4.98929e-55	1.72198e-52
LAMA3	-0.59767	3.67869e-17	9.93675e-15			SLC30A1	1.06461	3.14e-83	1.22e-80			AKR1C3	2.09196	1.54198e-56	6.21034e-54			BMP7	-0.683778	1.09629e-54	3.72064e-52
NOX4	-0.820774	3.87521e-17	1.0296e-14			VCP	0.629839	3.53e-82	1.35e-79			MAFG	0.837767	9.69053e-56	3.83888e-53			PLPP3	-0.649085	1.40717e-54	4.69741e-52
SLC6A6	0.786914	4.44549e-17	1.16207e-14			HSPA5	0.772544	4.27e-82	1.61e-79			SELENOK	0.845893	1.69279e-55	6.59779e-53			B4GALT3	0.755617	3.57634e-53	1.1746e-50
NOS1	1.14299	4.76262e-17	1.2252e-14			BAG3	0.749631	1.79e-80	6.63e-78			POLR3A	0.62822	1.75725e-55	6.7403e-53			MAFK	0.757161	6.18661e-53	1.99965e-50
C2orf88	0.941546	7.8865e-17	1.99713e-14			RGS2	1.62793	2.08e-80	7.59e-78			DNAJB1	0.620043	1.50749e-54	5.69194e-52			ZNF121	0.807163	1.04238e-52	3.31655e-50
TRIM36	0.900063	8.30263e-17	2.07017e-14			PLPP3	-0.698107	2.73e-79	9.78e-77			UBR4	0.634749	1.58486e-54	5.89203e-52			PSMB2	0.622732	2.01885e-52	6.32459e-50
PDK4	0.812219	1.14476e-16	2.81107e-14			CALR	0.574152	5.86e-79	2.07e-76			SLC25A23	-0.869702	1.78239e-54	6.52596e-52			TXNRD1	0.652288	7.37043e-52	2.274e-49
DOC2B	-0.872804	1.25522e-16	3.03632e-14			NEU1	0.82149	9.8e-79	3.41e-76			SERPINE2	-0.715954	2.53723e-54	9.15105e-52			DDIT3	1.08866	8.95093e-52	2.72041e-49
LHX1	-0.760852	1.38509e-16	3.3012e-14			RC3H1	1.07071	2.68e-78	9.19e-76			LIPG	1.9653	4.15602e-54	1.47692e-51			CDKN2D	0.769472	1.62216e-51	4.85766e-49
MAFB	-1.36722	2.62538e-16	6.16661e-14			MLLT11	1.62662	5.58e-78	1.88e-75			DOC2B	-1.15564	7.56652e-54	2.64993e-51			CLIC5	-0.71488	1.90692e-51	5.62762e-49
PCK1	-0.717897	2.74793e-16	6.36223e-14			SERPINB8	1.09988	4.24e-77	1.41e-74			TTLL7	1.14341	1.37791e-53	4.75673e-51			RNF187	-0.774305	4.12364e-51	1.19957e-48
MAOA	1.09414	8.74431e-16	1.99604e-13			NXT2	1.06913	6.5e-77	2.13e-74			GLA	0.824377	5.55224e-52	1.88972e-49			THSD4	1.38993	4.60246e-51	1.32e-48
SYTL2	-1.0868	9.74883e-16	2.19444e-13			ZMIZ1	-0.69004	1.4e-76	4.54e-74			EHF	0.779532	8.15963e-52	2.73858e-49			SLC7A11	1.72307	6.50403e-51	1.83947e-48
NRN1	0.692503	1.0274e-15	2.28096e-13			RRP12	0.694882	5.5e-76	1.76e-73			ZFAND2A	0.917101	1.16785e-51	3.86591e-49			NR2F1	-1.16485	7.2147e-51	2.01251e-48
ADAMTS14	1.69377	1.50512e-15	3.29642e-13			PMAIP1	1.03835	1.71e-75	5.38e-73			BAG3	0.69596	2.22576e-51	7.2683e-49			RRP12	0.689085	8.68135e-51	2.3889e-48
IGFBP5	-1.31536	1.83485e-15	3.965e-13			PSMD14	0.655973	3.4e-75	1.06e-72			BMP7	-0.661705	3.41662e-51	1.10084e-48			MIR22HG	0.998992	3.86734e-50	1.05001e-47
GDF15	1.05089	3.99351e-15	8.47729e-13			DNTTIP2	0.698985	6.35e-75	1.95e-72			SLC7A11	1.59406	1.90838e-50	6.06791e-48			NR4A1	0.918211	3.96794e-50	1.06315e-47
AOX1	-1.12607	4.02759e-15	8.47729e-13			MAPK6	0.921864	7.76e-75	2.35e-72			LBH	-0.667384	3.42903e-50	1.07614e-47			CRY2	1.02719	6.24572e-50	1.65171e-47
UPK3B	-0.989282	4.45613e-15	9.25904e-13			ISCU	0.723775	2.3e-74	6.87e-72			PPP1R15B	0.727477	7.02212e-50	2.17551e-47			IL1R1	-0.592078	3.79575e-48	9.90934e-46
SAA1	1.59982	6.04701e-15	1.24056e-12			MAFF	1.1007	3.53e-74	1.04e-71			CGA	1.78404	1.60514e-49	4.90991e-47			FTL	0.607143	3.94168e-48	1.01601e-45
RAPGEF3	-0.786021	7.0661e-15	1.4315e-12			NR4A1	0.967201	6.22e-74	1.81e-71			MPZ	1.25993	4.46301e-49	1.34811e-46			TMED4	0.616243	6.71546e-48	1.70934e-45
FOS	0.83527	7.68019e-15	1.5367e-12			SCPEP1	0.956501	4.78e-73	1.37e-70			HYOU1	0.687473	4.60217e-49	1.37298e-46			DNAJB9	0.898412	8.17563e-48	2.05531e-45
CRB2	-0.796527	9.42484e-15	1.86279e-12			TUBB4B	0.656018	1.01e-72	2.88e-70			ARL4C	-0.839502	9.64601e-49	2.84263e-46			ZNF699	1.65889	1.89548e-47	4.70704e-45
SLC26A7	-1.41357	9.6316e-15	1.87218e-12			CCDC3	-0.787641	5.89e-72	1.65e-69			TNS3	-0.635189	3.10936e-48	9.05274e-46			IGSF8	0.758547	2.39582e-47	5.87785e-45
SLC48A1	-0.764327	9.70341e-15	1.87218e-12			PGRMC1	0.652462	1.15e-71	3.19e-69			PELO	0.857623	3.24665e-48	9.33991e-46			CGA	1.82777	4.05335e-47	9.82599e-45
CXXC5	-0.716857	1.47214e-14	2.80695e-12			DNAJB9	1.05872	1.77e-71	4.85e-69			CCL28	-0.875482	5.47688e-48	1.55704e-45			GOLGA3	0.714731	1.49377e-46	3.57855e-44
TNS2	-0.905493	2.01682e-14	3.80077e-12			SESN2	0.960573	7.79e-71	2.11e-68			GRAMD2B	-0.636755	1.30378e-47	3.66346e-45			SMO	-1.1684	2.41479e-46	5.71772e-44
SOX17	0.837494	4.00374e-14	7.45847e-12			MXD1	1.4252	1.49e-70	3.98e-68			CRY2	1.02275	1.73311e-47	4.81387e-45			MET	0.960171	2.89383e-46	6.77323e-44
ADRA2C	-1.3387	5.5701e-14	1.02585e-11			TCIM	1.64242	2.93e-70	7.76e-68			MYH14	1.13522	1.49212e-46	4.09739e-44			SCPEP1	0.873515	7.72366e-46	1.78724e-43
GPR162	-0.900986	6.477e-14	1.17947e-11			DNAJB1	0.683804	4.12e-70	1.08e-67			ZNF699	1.61269	5.65698e-46	1.53597e-43			NRCAM	1.62355	9.138e-46	2.09075e-43
FBN2	-0.668023	7.98356e-14	1.43766e-11			ADAMTS1	0.925852	6.75e-70	1.75e-67			SLC1A5	0.707979	1.12246e-45	3.01094e-43			CTSL	0.713506	1.22102e-45	2.76263e-43
CPB1	-1.63893	8.82129e-14	1.57106e-11			HELB	1.10304	3.94e-69	1.01e-66			GDF15	1.35016	1.13385e-45	3.01094e-43			TNC	0.673216	3.19867e-45	7.15763e-43
ITGB4	-0.929867	1.31589e-13	2.3181e-11			MIR22HG	1.10987	1.05e-68	2.66e-66			BCAN	1.33099	2.67221e-45	7.01891e-43			CBR1	0.718001	3.78283e-45	8.37281e-43
THBS1	-0.832631	1.38659e-13	2.4164e-11			MET	1.03067	1.81e-68	4.54e-66			SLC3A2	0.806845	4.60529e-45	1.19663e-42			VCP	0.633307	4.87393e-45	1.06718e-42
BCYRN1	1.39802	2.38798e-13	4.11724e-11			MAFK	0.828053	2.79e-68	6.91e-66			DDIT3	0.999042	6.12005e-45	1.57331e-42			MAFF	0.961553	5.15794e-45	1.11735e-42
SORCS1	0.787277	3.42865e-13	5.84927e-11			GDF11	-0.743763	3.02e-68	7.4e-66			IFITM1	0.890172	1.96599e-44	5.00085e-42			ADAMTS1	0.762577	7.27693e-45	1.55979e-42
KLK7	-0.665908	5.28003e-13	8.9139e-11			SLC25A23	-0.921784	4.24e-68	1.03e-65			MXD1	1.18015	2.81109e-44	7.07604e-42			DOC2B	-1.21728	1.73527e-44	3.68076e-42
NRIP1	0.767593	5.74032e-13	9.59107e-11			CTSL	0.717349	5.06e-68	1.22e-65			ABCA2	-0.780138	3.1213e-44	7.77591e-42			SPAG9	0.633886	2.50396e-44	5.25652e-42
BLACAT1	-1.17699	5.8031e-13	9.59703e-11			PSMB2	0.588178	6.79e-68	1.62e-65			NEU1	0.821793	6.86858e-44	1.69367e-41			SLC1A3	-1.02626	2.8658e-44	5.95472e-42
RASSF10	-1.70818	8.85075e-13	1.44893e-10			IFRD1	0.781814	1.6e-67	3.77e-65			PRKX	0.817713	7.91943e-44	1.93306e-41			ATP2A2	0.546359	1.25133e-43	2.57383e-41
ANXA1	0.516823	1.0773e-12	1.74598e-10			ATP2A2	0.554086	1.19e-66	2.78e-64			QPRT	-0.649873	8.22533e-44	1.98765e-41			OSER1	0.716932	1.27746e-43	2.60129e-41
MME	-0.804787	1.32925e-12	2.13299e-10			LIG4	0.820337	1.7e-66	3.92e-64			MET	0.867775	1.18017e-43	2.82364e-41			SESN2	0.803532	1.45232e-43	2.92809e-41
AR	0.778953	1.37788e-12	2.18934e-10			EIF5	0.594553	1.79e-66	4.09e-64			IL1R1	-0.554313	1.65346e-43	3.91723e-41			PSMB3	0.725441	3.60471e-43	7.19634e-41
CLSTN2	-1.12529	1.7981e-12	2.8293e-10			ZNF699	1.7702	4.65e-66	1.05e-63			ST6GALNAC1	1.20019	2.66533e-43	6.25318e-41			SERPINB8	0.965822	1.11865e-42	2.21157e-40
DHRS2	0.802559	1.96165e-12	3.05697e-10			SAMD8	0.616516	1.24e-65	2.77e-63			DGKG	2.11965	3.71572e-43	8.6337e-41			CCDC3	-0.788086	4.76528e-42	9.33033e-40
KCNJ16	-1.14994	2.43424e-12	3.75731e-10			TSPYL2	0.783848	3.16e-65	7.02e-63			TDO2	4.05457	8.73439e-43	2.01016e-40			ISCU	0.677985	6.40142e-42	1.24145e-39
OLFML2A	-0.892573	2.55456e-12	3.90583e-10			YWHAG	0.550198	4.27e-64	9.39e-62			HELB	0.89733	5.18355e-42	1.1817e-39			CXXC5	-0.790258	6.64931e-42	1.27736e-39
SLC7A5	0.682745	2.65026e-12	4.01428e-10			SPAG9	0.708182	5.12e-64	1.12e-61			RRP12	0.636003	8.37518e-42	1.89146e-39			BLVRB	1.06442	1.21313e-41	2.30868e-39
2025-03-11	-1.27995	3.43286e-12	5.15151e-10			MPZ	1.43452	8.12e-64	1.75e-61			SCPEP1	0.772781	9.04132e-42	2.023e-39			HELB	0.902434	1.86674e-41	3.51966e-39
PKD2	-0.813545	3.79589e-12	5.64404e-10			KCTD9	0.926263	1.24e-63	2.64e-61			NOX4	-0.745488	3.4719e-41	7.6971e-39			MLLT11	1.46713	2.25563e-41	4.21388e-39
SERPINE2	-0.521465	4.36085e-12	6.35026e-10			LARP4	0.672944	2.93e-63	6.21e-61			APOL2	0.814664	4.17986e-41	9.1824e-39			CSRNP1	0.765846	5.34037e-41	9.886e-39
DUSP13	0.895588	4.37066e-12	6.35026e-10			TMED4	0.589385	6.6e-63	1.39e-60			OSER1	0.635349	5.83655e-41	1.27063e-38			SLC25A23	-0.885232	6.15087e-41	1.12838e-38
NDRG2	-0.964937	4.38841e-12	6.35026e-10			EMC7	0.795629	1.16e-62	2.41e-60			TXNRD1	0.560668	7.14e-41	1.54052e-38			TSPYL2	0.729762	6.79389e-41	1.23521e-38
CAPS	0.825535	4.60299e-12	6.60183e-10			NR2F1	-1.11944	1.35e-62	2.79e-60			CEMIP	1.2957	8.58145e-41	1.83514e-38			UBR4	0.663846	8.97245e-41	1.61687e-38
RTL5	-0.873016	5.19488e-12	7.38539e-10			TENT5A	0.841144	1.76e-62	3.6e-60			DNAJB9	0.798368	1.80678e-40	3.8299e-38			EMC7	0.734135	2.00814e-40	3.587e-38
IL1R1	-0.560617	5.3e-12	7.40912e-10			BLVRB	1.07488	1.11e-61	2.26e-59			BCL6	1.17337	3.22985e-40	6.7869e-38			GBE1	0.685566	4.57705e-40	8.10456e-38
EVA1A	-0.868254	5.303e-12	7.40912e-10			TNS3	-0.714763	1.72e-61	3.45e-59			CDKN2D	0.691706	5.23787e-40	1.09115e-37			PPP1R15B	0.763533	9.99654e-40	1.75482e-37
WTIP	-0.728032	5.6012e-12	7.75886e-10			CGA	1.99318	2.45e-61	4.87e-59			MAFK	0.708427	5.99873e-40	1.23897e-37			MXD1	1.27154	3.3735e-39	5.87134e-37
VSIR	-0.946931	6.00013e-12	8.24102e-10			RELT	1.03485	9.54e-61	1.88e-58			ZMIZ1	-0.53719	6.55087e-40	1.34154e-37			BIRC5	-0.696398	3.42588e-39	5.91197e-37
EPS8L2	-0.702325	6.1811e-12	8.41824e-10			EIF4A3	0.531777	9.61e-61	1.88e-58			LMTK2	0.674813	1.00807e-39	2.04705e-37			CRYAB	1.20548	5.01828e-39	8.58716e-37
SYNPO	-0.779857	7.62086e-12	1.02926e-09			UBR4	0.584316	1.14e-60	2.21e-58			TNC	0.66269	1.73318e-39	3.4902e-37			GOLGA2	0.698715	5.5202e-39	9.36732e-37
CP	0.689171	8.22496e-12	1.10167e-09			PNPLA8	0.711007	1.17e-60	2.25e-58			CXXC5	-0.794701	1.89083e-39	3.77619e-37			EIF4EBP2	-0.622278	6.10903e-39	1.02808e-36
RBBP8	0.675758	8.31349e-12	1.1044e-09			MRPS16	-0.633683	1.29e-60	2.46e-58			HTATIP2	0.731648	2.7993e-39	5.54468e-37			CALR	0.598279	7.37252e-39	1.23055e-36
LCN2	1.28426	8.45836e-12	1.11102e-09			ZFAND5	0.635009	1.59e-60	3.01e-58			DYNC1H1	0.610044	4.30906e-39	8.46572e-37			RELT	0.896464	1.15575e-38	1.91339e-36
EIF4EBP2	-0.547835	8.50043e-12	1.11102e-09			EMX2OS	-0.536656	2.77e-60	5.21e-58			USP49	0.695863	4.98631e-39	9.71727e-37			ATP6V1A	0.719005	2.05866e-38	3.38069e-36
PKDCC	0.775857	1.00455e-11	1.30246e-09			LDLR	0.499889	1.15e-59	2.14e-57			CYP4F11	0.857643	6.20102e-39	1.19878e-36			QPRT	-0.705583	3.41215e-38	5.55853e-36
RBP1	-0.743792	1.19267e-11	1.53409e-09			TAF13	0.792969	1.33e-59	2.45e-57			NR4A1	0.891973	6.62813e-39	1.27118e-36			ZMIZ1	-0.540619	4.03219e-38	6.51646e-36
TSPAN14	0.508204	1.75452e-11	2.23902e-09			CSRNP1	0.79793	3.49e-59	6.4e-57			SESN2	0.74887	7.6594e-39	1.4574e-36			MANF	0.657091	5.19309e-38	8.32653e-36
SLC1A3	-0.594186	1.78978e-11	2.26617e-09			NDC1	-0.663889	4.46e-59	8.12e-57			HMGA2	-0.815048	8.62934e-39	1.62913e-36			TNS3	-0.620913	6.30027e-38	1.00228e-35
GPC5	-0.84562	2.30791e-11	2.89955e-09			PSME4	0.634836	1.5e-58	2.72e-56			WDR81	0.774903	8.87456e-39	1.66243e-36			LMTK2	0.754274	6.9291e-38	1.09378e-35
MSRB3	-0.718679	2.34109e-11	2.91862e-09			ASPH	0.613978	1.62e-58	2.91e-56			DUSP5	0.901312	1.8261e-38	3.39443e-36			TALDO1	0.582896	1.05176e-37	1.64746e-35
NPR3	1.02956	2.76119e-11	3.41607e-09			SNRNP48	0.769885	1.05e-57	1.87e-55			CA12	3.07615	1.91505e-38	3.53262e-36			GNS	0.505653	1.51071e-37	2.34829e-35
NDP	7.2645	2.8857e-11	3.54307e-09			GBE1	0.716544	1.64e-57	2.89e-55			GOLGA2	0.655436	2.0735e-38	3.79591e-36			APMAP	0.521844	2.02857e-37	3.12938e-35
MEST	-0.590964	3.07294e-11	3.74459e-09			RAB11FIP4	-0.60779	3.84e-57	6.72e-55			MANF	0.613153	2.35896e-38	4.28603e-36			ABCA2	-0.779795	4.40948e-37	6.75114e-35
AFAP1L1	1.65217	3.19991e-11	3.87022e-09			BTAF1	0.540474	4.14e-57	7.2e-55			CCDC3	-0.71556	4.199e-38	7.5723e-36			WBP2	0.624799	4.74844e-37	7.21586e-35
CEND1	-0.8242	3.41031e-11	4.09415e-09			ZNF826P	1.56203	6.13e-57	1.06e-54			TSPYL2	0.671779	5.18157e-38	9.27501e-36			YWHAG	0.493913	8.34167e-37	1.25823e-34
TCIM	0.902948	3.54062e-11	4.21933e-09			FAM241B	0.786882	8.52e-57	1.46e-54			RGS10	-0.563602	6.93965e-38	1.23306e-35			DUSP5	0.928691	1.24085e-36	1.8579e-34
RBP2	-0.643507	4.07929e-11	4.82577e-09			UBC	0.596049	2.77e-56	4.71e-54			TNFSF9	1.59506	8.18309e-38	1.44339e-35			DYNC1H1	0.622341	1.63731e-36	2.43361e-34
COL5A1	-0.916671	4.20635e-11	4.94002e-09			NPLOC4	0.565374	5.9e-56	9.97e-54			MAPK6	0.659513	8.50014e-38	1.48845e-35			MECOM	-0.640142	2.80441e-36	4.13813e-34
ATP2B4	-0.53617	5.89077e-11	6.86846e-09			ABCA2	-0.836493	5.95e-56	9.98e-54			CD52	3.35377	8.71125e-38	1.51444e-35			LBH	-0.614904	3.0353e-36	4.4466e-34
UNC5B	0.622441	6.32002e-11	7.29179e-09			B4GALT3	0.693352	1.38e-55	2.3e-53			GOLGA3	0.627745	1.64595e-37	2.84102e-35			NPLOC4	0.537307	3.99844e-36	5.81573e-34
ARHGAP26	0.831102	6.34382e-11	7.29179e-09			UHRF1BP1L	0.834436	1.7e-55	2.81e-53			IFRD1	0.560603	2.0419e-37	3.49947e-35			EIF5	0.509116	9.83485e-36	1.42033e-33
KLHL13	-0.562015	6.80249e-11	7.76394e-09			RBM15	0.861909	1.4e-54	2.29e-52			PSMB2	0.503289	3.38236e-37	5.75597e-35			CELSR2	-0.635974	1.15897e-35	1.66198e-33
CHST15	0.633512	8.50903e-11	9.64376e-09			CNST	0.61209	2.11e-54	3.44e-52			CLIC5	-0.585975	3.693e-37	6.24066e-35			WDR62	0.666409	1.22359e-35	1.74237e-33
DIRAS2	2.63607	9.86715e-11	1.11053e-08			SMO	-1.01146	2.13e-54	3.46e-52			SBDS	0.630905	6.46825e-37	1.08545e-34			PHF1	0.573429	1.60951e-35	2.276e-33
PI3	0.91205	1.05013e-10	1.17376e-08			USP49	0.781878	2.22e-54	3.57e-52			CBR1	0.641509	6.952e-37	1.15859e-34			IFRD1	0.621699	2.36782e-35	3.32524e-33
SLC30A1	0.731773	1.18152e-10	1.31157e-08			IGSF8	0.668479	4.46e-54	7.12e-52			TMED4	0.532198	7.14978e-37	1.18339e-34			LHX1	-0.899325	2.65485e-35	3.70278e-33
DSTYK	-0.604128	2.07879e-10	2.2919e-08			BIRC5	-0.714159	4.59e-54	7.27e-52			ATP2A2	0.493328	1.00253e-36	1.64804e-34			MPZ	1.1893	3.08051e-35	4.26724e-33
TNS3	-0.532008	2.32408e-10	2.54503e-08			APOL2	0.898785	7.85e-54	1.24e-51			ISCU	0.617638	1.3547e-36	2.21191e-34			GLG1	0.577171	5.87714e-35	8.08623e-33
TMEM59L	-1.04711	2.3475e-10	2.55342e-08			LBH	-0.582827	9.07e-54	1.42e-51			CRYAB	1.09285	1.59816e-36	2.59192e-34			TM2D2	0.718297	1.04539e-34	1.42868e-32
COL26A1	-0.637769	2.61187e-10	2.82204e-08			CLIC5	-0.622472	1.46e-53	2.27e-51			RBM15	0.724677	1.87672e-36	3.0234e-34			RAB5IF	0.691547	1.13666e-34	1.54305e-32
ANO8	-0.979236	2.92094e-10	3.13507e-08			GBA	0.644076	1.47e-53	2.27e-51			ADAMTS14	1.99667	2.05623e-36	3.29065e-34			DENND5A	0.619876	1.22263e-34	1.64877e-32
KRT13	1.1474	3.14786e-10	3.3564e-08			IPMK	0.793403	2.13e-53	3.26e-51			SMO	-1.04696	3.09436e-36	4.91942e-34			HTATIP2	0.776287	2.93019e-34	3.92549e-32
SLC12A1	-0.995263	3.20136e-10	3.39114e-08			LMTK2	0.72016	2.14e-53	3.26e-51			SERPINB8	0.813339	3.23764e-36	5.11357e-34			MYH14	1.11614	4.28566e-34	5.70384e-32
PRR16	2.08342	3.56749e-10	3.75444e-08			CLIP1	0.747239	2.59e-53	3.92e-51			ID4	-0.74149	3.63912e-36	5.71035e-34			GBA	0.674927	6.79282e-34	8.98196e-32
CNTN6	-1.4496	4.2545e-10	4.44856e-08			BPNT1	0.571305	3.13e-53	4.71e-51			PLEKHA4	-0.704305	6.22706e-36	9.70818e-34			PIP4K2C	0.584944	9.17172e-34	1.20493e-31
ARL4D	0.74271	5.88664e-10	6.11569e-08			CBR1	0.727267	4.66e-53	6.97e-51			MAFF	0.82888	8.38608e-36	1.29904e-33			PDIA4	0.44481	1.14168e-33	1.49026e-31
PPP3CA	0.56372	6.35461e-10	6.55982e-08			GOLGA7	0.813723	6.83e-53	1.01e-50			WDR62	0.651231	1.00506e-35	1.54696e-33			COQ10B	0.960464	1.28246e-33	1.66335e-31
SEMA6B	-1.17109	6.61998e-10	6.79051e-08			IL1R1	-0.520985	9.04e-53	1.33e-50			B4GALT3	0.715227	1.67264e-35	2.55819e-33			CTR9	0.526652	1.41178e-33	1.8195e-31
PROS1	0.586828	6.88552e-10	6.99006e-08			OTUD7B	0.665888	2.48e-52	3.64e-50			SLC26A7	-1.45554	1.7044e-35	2.59037e-33			DNTTIP2	0.528491	1.7015e-33	2.1791e-31
FBLN1	0.727387	6.90078e-10	6.99006e-08			COQ10B	0.979149	3.48e-52	5.08e-50			PMAIP1	0.715358	2.4317e-35	3.67263e-33			MIDN	0.679462	1.99234e-33	2.53562e-31
TIMP2	-0.490038	7.74e-10	7.79144e-08			AL390728.4	0.792809	4.24e-52	6.14e-50			LMOD1	-0.714477	3.6497e-35	5.47795e-33			SERPINE2	-0.584312	2.6215e-33	3.31563e-31
FRZB	-0.449218	9.99067e-10	9.99498e-08			GDAP2	0.861333	1.32e-51	1.9e-49			OTUD3	0.734571	3.95466e-35	5.89904e-33			WDR81	0.758421	2.85077e-33	3.58335e-31
CALCOCO1	-0.549634	1.01023e-09	1.00446e-07			SLC39A6	0.526391	1.49e-51	2.13e-49			PIP4K2C	0.56252	4.23848e-35	6.28362e-33			APOL2	0.858664	3.35837e-33	4.1955e-31
ST3GAL6	0.673381	1.1005e-09	1.08379e-07			PRDX1	0.586341	2.28e-51	3.24e-49			CTSL	0.649568	5.36461e-35	7.90461e-33			FAM241B	0.789465	3.62723e-33	4.50373e-31
GRAMD2B	-0.507278	1.10338e-09	1.08379e-07			POFUT1	-0.650285	2.29e-51	3.24e-49			BLVRB	0.956988	8.30319e-35	1.21604e-32			RBM15	0.78182	3.70682e-33	4.57466e-31
PRPSAP1	-0.621851	1.15862e-09	1.13119e-07			FRMD4B	1.58544	2.47e-51	3.46e-49			SMG1P1	-0.76465	9.12671e-35	1.3286e-32			FKBP2	0.728212	4.81611e-33	5.90785e-31
CTH	0.630667	1.36649e-09	1.32615e-07			EIF4EBP2	-0.645526	2.48e-51	3.46e-49			VCP	0.5707	9.48302e-35	1.3722e-32			SSNA1	0.787446	6.27012e-33	7.60318e-31
TNFRSF11B	-0.769948	1.37906e-09	1.33038e-07			ALAS1	0.602763	4.26e-51	5.91e-49			2025-09-08	-0.672195	9.6739e-35	1.39149e-32			NOX4	-0.692144	6.27282e-33	7.60318e-31
VAV3	-0.458009	1.47333e-09	1.41292e-07			LHX1	-0.956588	6.31e-51	8.7e-49			MECOM	-0.605255	1.71925e-34	2.45833e-32			KCTD16	1.53798	7.65335e-33	9.2216e-31
FIBIN	-1.10023	1.7184e-09	1.63824e-07			ATP6V1A	0.733693	7.71e-51	1.06e-48			BIRC5	-0.625524	2.06376e-34	2.93357e-32			PGRMC1	0.587901	1.03128e-32	1.23529e-30
GRB10	0.767297	1.73048e-09	1.64011e-07			EXOC8	0.826537	8.8e-51	1.2e-48			SORCS1	0.959657	2.33151e-34	3.29479e-32			ARL4C	-0.788146	1.326e-32	1.57903e-30
UCHL1	0.515752	2.49152e-09	2.34768e-07			YOD1	0.844402	3.47e-50	4.71e-48			KCTD16	1.43963	2.83624e-34	3.98476e-32			ASPH	0.539828	1.39153e-32	1.64743e-30
BCL6	0.776485	2.67831e-09	2.50909e-07			ZNF562	0.585275	4.01e-50	5.4e-48			ALAS1	0.54969	3.23798e-34	4.52288e-32			CNST	0.525284	1.44009e-32	1.69506e-30
PPFIA2	-1.56688	2.76106e-09	2.57176e-07			MTF1	0.644915	4.24e-50	5.68e-48			TRIM36	0.91734	3.96219e-34	5.50266e-32			SCGB1D2	2.43396	2.27277e-32	2.6598e-30
NR2F1-AS1	-1.00951	2.77921e-09	2.57387e-07			PSMA5	0.537774	4.63e-50	6.17e-48			WTIP	-0.690998	4.26411e-34	5.88812e-32			AKR1C3	1.83089	2.36545e-32	2.75244e-30
AC091563.1	1.55566	3.38488e-09	3.11697e-07			ERRFI1	1.05853	1.69e-49	2.24e-47			SORBS3	-0.844299	5.27058e-34	7.23656e-32			TMEM208	0.755112	2.85901e-32	3.30784e-30
UQCRH	0.871926	3.60562e-09	3.30149e-07			DBN1	-0.567386	2.93e-49	3.86e-47			GCLM	0.661528	6.84402e-34	9.34382e-32			GRAMD2B	-0.566984	2.89704e-32	3.33291e-30
NOV	0.841225	3.6418e-09	3.31588e-07			WDR26	0.4985	4.01e-49	5.26e-47			ADAMTS1	0.627843	2.43622e-33	3.30737e-31			CDH23	1.50402	7.58362e-32	8.67558e-30
TRAK1	-0.463299	4.00237e-09	3.62383e-07			WBP2	0.582232	7.33e-49	9.55e-47			GBE1	0.605967	2.78975e-33	3.76617e-31			BUD23	0.513665	7.89624e-32	8.98275e-30
ST3GAL1	0.513301	4.18612e-09	3.76913e-07			DUSP5	0.963312	7.94e-49	1.03e-46			MAP1LC3B	0.600064	2.96039e-33	3.97432e-31			SLC30A1	0.933405	1.18417e-31	1.33963e-29
DACH2	1.74364	4.29303e-09	3.84404e-07			EPS8L2	-0.63766	8.85e-49	1.14e-46			ZNF121	0.756324	3.63514e-33	4.85322e-31			PSMA5	0.520839	1.24935e-31	1.40555e-29
FILIP1	0.702065	5.05314e-09	4.49979e-07			ASS1	-0.519309	1.38e-48	1.76e-46			DENND5A	0.584547	4.81777e-33	6.39678e-31			MRPS16	-0.533011	1.35564e-31	1.51676e-29
MAFA	-1.26131	5.25847e-09	4.65705e-07			SPTY2D1	0.713693	3.01e-48	3.84e-46			COQ10B	0.8187	5.35842e-33	7.07575e-31			IGHMBP2	0.60765	1.58051e-31	1.75868e-29
NELL1	-0.540576	5.30413e-09	4.67196e-07			CYP4F11	0.938386	3.25e-48	4.11e-46			MTF1	0.556171	6.12413e-33	8.04291e-31			RELL2	0.90055	1.66276e-31	1.84015e-29
EAF2	0.88113	5.37681e-09	4.71038e-07			TM2D2	0.749815	3.61e-48	4.54e-46			NQO2	0.739761	6.20717e-33	8.1079e-31			CLU	0.554405	2.16786e-31	2.38617e-29
GATA2	0.659152	5.90819e-09	5.14806e-07			CELSR2	-0.679773	4.54e-48	5.69e-46			RELT	0.88138	1.11138e-32	1.4439e-30			CREM	0.607188	2.73222e-31	2.9912e-29
SEMA6C	-0.67416	6.46311e-09	5.60148e-07			CD63	0.494486	6.14e-48	7.66e-46			GLG1	0.508548	1.23413e-32	1.5948e-30			TNFSF9	1.54043	3.09797e-31	3.37347e-29
BACE1	-0.642945	6.90237e-09	5.95036e-07			CREM	0.71239	8.49e-48	1.05e-45			ZBTB43	0.723172	3.6051e-32	4.6339e-30			LDLR	0.485902	3.62763e-31	3.92923e-29
SORCS2	-0.583408	8.02841e-09	6.88447e-07			RAB21	0.646437	8.64e-48	1.07e-45			TM2D2	0.624986	4.59366e-32	5.87332e-30			WTIP	-0.775103	4.40343e-31	4.74429e-29
TIMP3	-0.425202	8.58824e-09	7.32577e-07			MANF	0.630106	1.07e-47	1.32e-45			PGRMC1	0.491821	5.0013e-32	6.36086e-30			SQSTM1	0.505711	4.75689e-31	5.09813e-29
ANKRD2	0.609844	9.21638e-09	7.78996e-07			EAF1	0.865024	2.92e-47	3.57e-45			UGT2B7	0.804729	5.16964e-32	6.54055e-30			CYP4F11	0.792913	5.12535e-31	5.46426e-29
HGSNAT	-0.635486	9.22856e-09	7.78996e-07			IMPAD1	0.529273	3.63e-47	4.4e-45			RNF187	-0.693548	6.49352e-32	8.1727e-30			GDAP2	0.763129	5.73909e-31	6.08672e-29
NRXN3	1.28139	9.90444e-09	8.31717e-07			GABARAPL1	0.921703	5.46e-47	6.59e-45			GABARAPL1	0.770734	1.0828e-31	1.35574e-29			SBDS	0.663355	6.40526e-31	6.75805e-29
USP2	0.852782	1.0297e-08	8.60225e-07			PLAA	0.620096	6.97e-47	8.37e-45			IFITM10	1.46901	2.21479e-31	2.75878e-29			MTF1	0.580599	1.07691e-30	1.13037e-28
CSDC2	-1.03845	1.14962e-08	9.51873e-07			MSN	0.452336	7.67e-47	9.17e-45			GPATCH2L	0.615359	2.24865e-31	2.7866e-29			TDO2	3.79919	1.27946e-30	1.33608e-28
NPTX2	0.81126	1.15115e-08	9.51873e-07			CDKN2D	0.738813	8.71e-47	1.04e-44			ZFP36L2	-0.57484	2.40501e-31	2.96516e-29			ADIPOR1	0.480461	1.62839e-30	1.69178e-28
GRIK2	-1.0417	1.1724e-08	9.64518e-07			SBNO1	0.675546	3.04e-46	3.59e-44			GBA	0.657197	2.95013e-31	3.61877e-29			MAPK6	0.73067	2.00602e-30	2.07353e-28
TBC1D16	0.562419	1.39545e-08	1.14222e-06			HSP90AA1	0.490773	3.31e-46	3.9e-44			CRB2	-0.745657	3.4674e-31	4.2318e-29			SLC39A6	0.491065	2.08772e-30	2.14708e-28
NAT14	-0.700287	1.46231e-08	1.19094e-06			ANP32E	0.661249	4.38e-46	5.13e-44			DYNC1I1	1.71093	4.05967e-31	4.92974e-29			NQO2	0.783018	2.11568e-30	2.16491e-28
METRN	-0.677314	1.5532e-08	1.24939e-06			ZBTB43	0.83438	4.78e-46	5.57e-44			YRDC	0.592613	4.11174e-31	4.96801e-29			PSME4	0.544898	2.24115e-30	2.28183e-28
INHBE	0.973072	1.55363e-08	1.24939e-06			PIP4K2C	0.531662	7.9e-46	9.16e-44			PLAA	0.529683	4.47064e-31	5.37478e-29			CRB2	-0.761889	3.34054e-30	3.38425e-28
IFITM1	0.73776	1.55721e-08	1.24939e-06			DHCR24	-0.449614	9.04e-46	1.04e-43			SPAG9	0.580564	6.24115e-31	7.46621e-29			TUBB4B	0.636267	5.9075e-30	5.95517e-28
QRICH2	-0.89764	1.63031e-08	1.3016e-06			USP38	0.793026	9.09e-46	1.04e-43			CTR9	0.485541	6.29356e-31	7.49182e-29			SLC2A1	0.514107	6.05041e-30	6.06919e-28
UBR4	0.509689	1.64096e-08	1.30368e-06			COL26A1	-0.760807	1.28e-45	1.46e-43			PSMB3	0.700301	7.49236e-31	8.87514e-29			ALAS1	0.579887	6.39236e-30	6.38077e-28
HOXA-AS2	-0.768877	1.69064e-08	1.3366e-06			UBQLN4	-0.550652	1.33e-45	1.51e-43			UBE2M	0.563361	8.34582e-31	9.83789e-29			ZNF143	0.627692	6.47985e-30	6.43655e-28
SLC8A1	-0.534128	1.75163e-08	1.37809e-06			PHF1	0.602744	1.43e-45	1.62e-43			EIF5	0.479192	8.47552e-31	9.94228e-29			PTS	0.547506	7.35176e-30	7.26718e-28
KRCC1	-0.766432	1.89722e-08	1.48542e-06			ZNF143	0.670942	2.87e-45	3.24e-43			SLC15A2	0.991745	1.37927e-30	1.61014e-28			GADD45GIP1	-0.645074	1.07577e-29	1.05826e-27
LIX1	-1.5907	2.39144e-08	1.86337e-06			MAP1LC3B	0.750803	4.03e-45	4.52e-43			CALR	0.531485	1.55841e-30	1.81053e-28			DBN1	-0.499144	1.30288e-29	1.2755e-27
ELFN2	-1.12108	2.59192e-08	2.00991e-06			OTUD3	0.867421	4.97e-45	5.54e-43			FBXO21	0.569872	2.20507e-30	2.54955e-28			UNC5B	0.758656	1.36072e-29	1.32576e-27
SMO	-0.641373	2.74691e-08	2.11996e-06			AKR1B1	0.431629	1.7e-44	1.88e-42			PALM	-0.637615	2.54791e-30	2.93192e-28			RGS10	-0.543105	1.50167e-29	1.45612e-27
RAB26	-0.816423	2.84509e-08	2.18533e-06			TNC	0.518365	3.47e-44	3.84e-42			DNAJB11	0.532467	2.68799e-30	3.07845e-28			FAM189B	-0.631089	1.64812e-29	1.59056e-27
ARHGAP24	-1.58791	2.99275e-08	2.2879e-06			AQP5	-0.610406	7.2e-44	7.91e-42			MRPS16	-0.494788	2.82018e-30	3.21461e-28			MSN	0.477913	1.80655e-29	1.73523e-27
DOC2A	1.39189	3.05525e-08	2.32472e-06			GPATCH2L	0.733097	9.24e-44	1.01e-41			TJP3	-0.667264	3.78371e-30	4.29264e-28			USP49	0.68169	2.34965e-29	2.24629e-27
CHRDL1	0.655669	3.07337e-08	2.32757e-06			CRTAP	-0.429315	1.06e-43	1.15e-41			EMC7	0.643876	5.83778e-30	6.59205e-28			EHF	0.591328	2.38437e-29	2.26882e-27
TNS1	-0.636517	3.11881e-08	2.351e-06			BCL9	0.534111	1.87e-43	2.02e-41			ERRFI1	0.884238	6.33396e-30	7.11908e-28			COL26A1	-0.671773	3.77191e-29	3.57244e-27
CAMK1G	5.00139	3.18412e-08	1			SLC30A7	0.632852	2.18e-43	2.35e-41			BBOX1	-0.748187	1.31631e-29	1.47263e-27			MAP2K1	0.635478	4.58128e-29	4.31892e-27
TEAD1	-0.464051	3.30347e-08	2.47868e-06			ARL5B	0.584192	3.23e-43	3.47e-41			NXT2	0.717424	1.53011e-29	1.70393e-27			DYNC1I1	1.8702	6.07151e-29	5.69743e-27
WNT6	-1.61756	3.32039e-08	2.47989e-06			KCTD16	1.60569	3.27e-43	3.49e-41			NPLOC4	0.50084	1.85168e-29	2.05256e-27			SELENOS	0.583715	6.86113e-29	6.40887e-27
H6PD	-0.473535	3.75272e-08	2.78992e-06			SORCS2	-0.646383	3.65e-43	3.88e-41			BTG3	0.564805	1.94425e-29	2.14533e-27			ERRFI1	1.00967	7.229e-29	6.72165e-27
CD55	0.529243	3.80836e-08	2.81836e-06			POP1	0.912749	4.16e-43	4.41e-41			TIPARP	0.80328	2.2666e-29	2.48966e-27			SOX6	1.96812	1.18612e-28	1.09786e-26
PPIAP77	1.23887	3.89459e-08	2.85076e-06			HELLS	0.681419	8.28e-43	8.73e-41			SLC30A1	0.727065	2.75819e-29	3.01591e-27			DDIAS	0.657311	1.36555e-28	1.25822e-26
FGF18	-0.539241	3.89643e-08	2.85076e-06			WDR62	0.633756	9.35e-43	9.82e-41			HSD11B1	5.09809	3.1969e-29	3.47986e-27			PSMD6	0.557617	1.49307e-28	1.36952e-26
FBXO21	0.474373	3.90491e-08	2.85076e-06			IGHMBP2	0.641244	1.04e-42	1.09e-40			KMT2D	0.493822	3.48779e-29	3.77948e-27			INCENP	0.550948	1.75544e-28	1.60296e-26
FAXDC2	-0.553052	4.04432e-08	2.93929e-06			CCDC186	0.706653	1.08e-42	1.12e-40			CSRNP1	0.63908	3.76843e-29	4.06537e-27			CLIP1	0.684531	2.25462e-28	2.04959e-26
CCDC18-AS1	-0.658842	4.24081e-08	3.06834e-06			PALM	-0.683326	1.67e-42	1.73e-40			KCTD9	0.719942	3.79626e-29	4.07718e-27			DRAP1	0.554099	2.34103e-28	2.11869e-26
SLC25A23	-0.572383	4.44531e-08	3.202e-06			CTR9	0.555312	1.7e-42	1.76e-40			PSMD6	0.526536	4.36404e-29	4.66624e-27			PLAA	0.573044	2.51537e-28	2.2664e-26
MUC1	-0.596881	4.79449e-08	3.43824e-06			CCNI	-0.503356	3.21e-42	3.29e-40			MSRB3	-0.814189	7.71818e-29	8.2163e-27			B4GALNT1	0.808747	2.87133e-28	2.56767e-26
CRISPLD2	-0.854275	5.0034e-08	3.57225e-06			MECOM	-0.617171	3.85e-42	3.94e-40			SLC6A6	0.742005	1.82085e-28	1.92986e-26			PSMC4	0.529645	2.87496e-28	2.56767e-26
CTSL	0.43761	5.1163e-08	3.63683e-06			YRDC	0.700227	4.7e-42	4.78e-40			GPR162	-0.797573	1.91801e-28	2.02396e-26			UHRF1BP1L	0.711368	2.90136e-28	2.57993e-26
ADORA1	-0.85365	5.19965e-08	3.67994e-06			PSMC4	0.486797	5.24e-42	5.29e-40			CNST	0.484988	2.72861e-28	2.86682e-26			APOL1	0.81627	3.87971e-28	3.43489e-26
VTCN1	-0.570454	7.04218e-08	4.96229e-06			WFS1	0.633268	5.26e-42	5.29e-40			NOMO2	0.556374	3.06164e-28	3.20279e-26			PI4K2A	0.606064	4.64245e-28	4.09239e-26
PPP1R26-AS1	-0.917288	7.4412e-08	5.22076e-06			ADAM9	0.614686	5.26e-42	5.29e-40			NPR3	1.39684	3.08637e-28	3.21475e-26			FKBP5	1.35905	4.70122e-28	4.12633e-26
PPFIA3	0.772618	7.94622e-08	5.55105e-06			NFIX	-0.595869	5.83e-42	5.84e-40			MSN	0.430166	3.24058e-28	3.36088e-26			PRDX1	0.509715	5.02606e-28	4.39252e-26
AIF1L	-0.429924	8.10672e-08	5.63886e-06			USP5	0.545862	5.92e-42	5.9e-40			NDC1	-0.583332	5.19482e-28	5.36465e-26			BCAP31	0.470904	5.36854e-28	4.67178e-26
POFUT1	-0.436105	8.17546e-08	5.66238e-06			CEP55	0.550684	1.1e-41	1.1e-39			COL26A1	-0.602644	7.40642e-28	7.61601e-26			CTSD	0.55022	5.45421e-28	4.72613e-26
MVP	-0.581636	8.79237e-08	6.06374e-06			TNFSF9	1.6543	1.5e-41	1.48e-39			BCL9	0.477917	8.03336e-28	8.22568e-26			NIPAL3	0.654239	5.5664e-28	4.80291e-26
KRT15	0.716497	8.90033e-08	6.11219e-06			ADIPOR1	0.457839	1.66e-41	1.63e-39			OLFML2A	-1.08349	8.41058e-28	8.57559e-26			GCLM	0.800838	9.39765e-28	8.07444e-26
GLIS3	1.44651	8.95824e-08	6.12087e-06			KLHL15	0.669955	1.68e-41	1.64e-39			TRIM54	1.73147	8.6969e-28	8.83028e-26			TRAK1	-0.548055	9.57237e-28	8.19001e-26
PTAFR	-0.774836	8.9885e-08	6.12087e-06			PSMD8	0.484824	2.2e-41	2.14e-39			ALDH7A1	-0.434393	1.34768e-27	1.36262e-25			2025-09-08	-0.676654	1.05133e-27	8.95742e-26
TNFSF10	-0.911069	9.17046e-08	6.21864e-06			BTBD2	-0.714233	2.45e-41	2.38e-39			B4GALNT1	0.788028	1.42813e-27	1.43795e-25			CELSR1	-0.557085	1.09952e-27	9.32897e-26
CD52	2.00469	9.27145e-08	6.26093e-06			PSMB5	0.460055	3.52e-41	3.4e-39			VSIR	-1.00373	1.45197e-27	1.45588e-25			YRDC	0.626683	1.19877e-27	1.01288e-25
NAP1L2	0.582232	9.65876e-08	6.49541e-06			TAF2	0.519513	5.03e-41	4.83e-39			RHEBP2	0.670519	1.68335e-27	1.68092e-25			PSMD14	0.507804	1.25221e-27	1.05367e-25
SNHG18	-0.490955	1.09714e-07	7.34769e-06			TMEM208	0.706981	5.04e-41	4.83e-39			RC3H1	0.835442	1.78806e-27	1.77813e-25			USP5	0.560482	1.27475e-27	1.06822e-25
SASH1	-0.406761	1.17712e-07	7.85084e-06			SLC2A1	0.489077	7.89e-41	7.54e-39			CYR61	0.627392	2.22694e-27	2.20549e-25			CCDC146	0.649723	1.6517e-27	1.37843e-25
GPR153	0.964501	1.18764e-07	7.88857e-06			TMX3	0.607815	8.93e-41	8.5e-39			POP1	0.738069	2.40738e-27	2.37446e-25			AP1M2	-0.529267	1.86896e-27	1.55337e-25
ID3	-0.680551	1.31621e-07	8.70688e-06			NRCAM	1.36755	9.71e-41	9.2e-39			PTS	0.502328	2.43227e-27	2.38926e-25			SPTY2D1	0.651995	1.95297e-27	1.6166e-25
CNKSR3	0.608745	1.32315e-07	8.71718e-06			NQO2	0.805245	1.03e-40	9.72e-39			SORCS2	-0.696473	2.45194e-27	2.39883e-25			NXT2	0.843085	1.98864e-27	1.63946e-25
CPNE8	-0.829661	1.35995e-07	8.92339e-06			LGR5	-0.527045	1.15e-40	1.08e-38			DBN1	-0.502812	2.64143e-27	2.5738e-25			FOS	0.97744	2.27109e-27	1.86476e-25
CPE	-0.489806	1.41012e-07	9.21522e-06			DENND5A	0.641186	1.21e-40	1.13e-38			LTA4H	-0.459235	3.14372e-27	3.05092e-25			TFRC	0.441521	2.77206e-27	2.26697e-25
BX571818.1	0.438715	1.48057e-07	9.6368e-06			RELL2	0.96394	1.39e-40	1.3e-38			SLC48A1	-0.595814	3.21511e-27	3.10773e-25			JUNB	0.587586	3.09386e-27	2.52001e-25
CILP	1.14608	1.56119e-07	1.01209e-05			PLEKHG4B	-0.799726	1.64e-40	1.52e-38			SERPINF2	1.95409	3.58625e-27	3.45265e-25			CDKN2C	-0.506272	3.36681e-27	2.73141e-25
FAM155B	0.511864	1.6331e-07	1.05449e-05			RHEB	0.625194	1.65e-40	1.53e-38			CLN8	0.684417	3.92512e-27	3.76391e-25			IL15RA	0.987504	4.11419e-27	3.32449e-25
SPP1	1.14066	1.72404e-07	1.10879e-05			AHNAK	-0.496941	1.68e-40	1.55e-38			H6PD	-0.586246	4.3643e-27	4.16851e-25			RC3H1	0.951999	5.77336e-27	4.64675e-25
C10orf99	1.69486	1.78662e-07	1.1445e-05			TBK1	0.653013	1.91e-40	1.75e-38			CASC10	-0.741508	4.56056e-27	4.33882e-25			XBP1	0.537559	7.76529e-27	6.22537e-25
AC025887.2	2.02024	1.80974e-07	1.15053e-05			2025-03-06	0.498018	1.92e-40	1.75e-38			POFUT1	-0.511661	4.83857e-27	4.58526e-25			ARHGDIA	0.521034	9.91071e-27	7.91419e-25
PLEKHB1	-0.730306	1.81023e-07	1.15053e-05			CLIC1	0.446544	2.14e-40	1.95e-38			MEIS1	-0.501503	5.46461e-27	5.15829e-25			NDC1	-0.572788	1.37667e-26	1.09504e-24
MYC	0.624789	1.82205e-07	1.15351e-05			CLU	0.506175	2.3e-40	2.09e-38			RELL2	0.845741	5.73557e-27	5.393e-25			BTBD2	-0.584873	1.66294e-26	1.31761e-24
LAMA2	-0.408677	1.91223e-07	1.2059e-05			ATP1B1	0.772	3.08e-40	2.78e-38			MIDN	0.572476	5.99901e-27	5.61884e-25			POFUT1	-0.561434	2.22723e-26	1.75787e-24
TTC26	-0.92198	1.93043e-07	1.21266e-05			CHMP5	0.455314	3.53e-40	3.18e-38			UHRF1BP1L	0.65205	7.21168e-27	6.72858e-25			ENO2	0.645021	2.87322e-26	2.25897e-24
DGKG	1.13387	2.04106e-07	1.2772e-05			PSMD2	0.43122	3.54e-40	3.18e-38			IGHMBP2	0.625283	7.61162e-27	7.07441e-25			SUCLG1	-0.599258	3.02871e-26	2.36448e-24
MMP2	-1.05619	2.15128e-07	1.34099e-05			ARFGAP3	0.703811	3.7e-40	3.31e-38			FTL	0.575863	9.87215e-27	9.14025e-25			PMAIP1	0.823966	3.03064e-26	2.36448e-24
SPON1	-0.36258	2.16943e-07	1.34713e-05			PI4K2A	0.633244	3.91e-40	3.48e-38			TFPI2	0.835459	1.08465e-26	1.0004e-24			AL390728.4	0.620284	3.06645e-26	2.38328e-24
IL18	-0.634693	2.45178e-07	1.51664e-05			WDR81	0.764639	4.03e-40	3.57e-38			YWHAG	0.438169	1.34477e-26	1.2356e-24			KLHL21	0.486925	3.14704e-26	2.43662e-24
LINC00462	1.72052	2.51154e-07	1.5477e-05			FOS	0.995109	5.42e-40	4.78e-38			FAM241B	0.720432	2.44247e-26	2.23569e-24			RAB11FIP4	-0.446043	3.56985e-26	2.75352e-24
VANGL2	-0.869596	2.68477e-07	1.64818e-05			GTF2A1	0.602107	5.43e-40	4.78e-38			FKBP2	0.619293	2.84026e-26	2.59e-24			PRKX	0.681427	4.13142e-26	3.17464e-24
TESC	0.936071	2.70356e-07	1.65346e-05			SERTAD2	0.65365	7.32e-40	6.4e-38			LDLR	0.435252	4.37414e-26	3.97373e-24			DIAPH1	0.412223	4.60372e-26	3.52427e-24
EFNB3	-1.40475	3.0855e-07	1.87995e-05			ATP6V0B	0.487313	7.33e-40	6.4e-38			NUP205	-0.521003	4.61261e-26	4.17467e-24			UBC	0.536696	5.09497e-26	3.88573e-24
SLC7A2	0.460302	3.13057e-07	1.90027e-05			CALU	0.554937	7.69e-40	6.68e-38			ASRGL1	0.890023	4.70217e-26	4.23985e-24			RIMS4	-0.753422	6.09676e-26	4.6324e-24
EHF	0.416065	3.15374e-07	1.90719e-05			SELENOS	0.611441	9.56e-40	8.28e-38			AC093323.1	0.507833	4.75123e-26	4.26816e-24			OTUD3	0.689244	6.25984e-26	4.73863e-24
FXYD7	-1.61347	3.27866e-07	1.97536e-05			SRXN1	1.28329	9.63e-40	8.32e-38			TSPAN1	-0.687967	4.78629e-26	4.28373e-24			UBQLN1	0.461274	6.91027e-26	5.21162e-24
HOMER2	0.549692	3.31086e-07	1.98737e-05			MAPRE2	0.758685	1.76e-39	1.51e-37			EIF4EBP2	-0.547842	5.45984e-26	4.86853e-24			OSBP	0.502471	7.29999e-26	5.48523e-24
CDKN1A	-1.28962	3.3429e-07	1.9992e-05			CLDND1	0.656652	1.76e-39	1.51e-37			FOS	0.867853	8.44771e-26	7.50511e-24			LGR5	-0.500895	9.33253e-26	6.9867e-24
CLN8	0.499966	3.41216e-07	2.02962e-05			DYNC1H1	0.590805	3.57e-39	3.05e-37			NDEL1	0.563605	1.10382e-25	9.77061e-24			EMC4	0.528828	1.00286e-25	7.48033e-24
FASTKD1	-0.534331	3.41881e-07	2.02962e-05			VMP1	0.475952	1.05e-38	8.91e-37			ZFAND5	0.456322	1.14444e-25	1.00933e-23			MAPRE2	0.693854	1.19004e-25	8.84405e-24
ZBED5	-0.511149	3.53496e-07	2.09092e-05			TMUB1	-0.786235	1.29e-38	1.09e-36			GRIK2	-1.33572	1.28153e-25	1.12612e-23			PALM	-0.579677	1.81784e-25	1.34606e-23
HK2	0.416062	3.58289e-07	2.11156e-05			KIF21A	0.803536	1.4e-38	1.19e-36			IQGAP2	-0.571675	1.60753e-25	1.40746e-23			FASTK	-0.638101	1.883e-25	1.38926e-23
TMEM26	-0.626325	3.63943e-07	2.13711e-05			IQGAP2	-0.599077	1.41e-38	1.19e-36			CELSR2	-0.501738	1.96083e-25	1.71059e-23			SBNO1	0.635016	2.06789e-25	1.52016e-23
MYH14	0.732707	3.90425e-07	2.28434e-05			KDM5C	0.459699	1.47e-38	1.23e-36			TOX	-0.560115	1.98225e-25	1.72306e-23			CD63	0.510044	2.28526e-25	1.67391e-23
AC034236.1	-0.524298	4.08774e-07	2.38309e-05			MAP2K1	0.639238	1.57e-38	1.31e-36			PI4K2A	0.573104	2.2851e-25	1.97919e-23			CDKN1C	0.733108	2.2995e-25	1.6783e-23
NPNT	-0.61012	4.11832e-07	2.39232e-05			SBDS	0.745182	1.84e-38	1.53e-36			UPK3B	-0.726528	2.84668e-25	2.45679e-23			HK2	0.449411	2.39644e-25	1.74281e-23
PELO	0.448811	4.24547e-07	2.45737e-05			NUP205	-0.620611	1.85e-38	1.53e-36			ZNF608	-0.548966	2.96139e-25	2.53976e-23			CENPX	0.560724	2.4891e-25	1.80375e-23
ATP9A	-0.438109	4.29962e-07	2.47986e-05			PES1	-0.645099	2.31e-38	1.91e-36			GNS	0.415645	2.96385e-25	2.53976e-23			ASS1	-0.471378	2.56605e-25	1.85292e-23
GDF11	-0.437264	4.53019e-07	2.60357e-05			CELSR1	-0.600446	2.76e-38	2.28e-36			APOL1	0.716318	3.01787e-25	2.56886e-23			MDH1	-0.517571	2.85637e-25	2.05527e-23
C1orf198	0.3944	4.55614e-07	2.60924e-05			C19orf48	-0.705763	2.87e-38	2.36e-36			KLK10	0.977775	3.01907e-25	2.56886e-23			OTUD7B	0.540173	2.87556e-25	2.0618e-23
P3H2	-0.369194	4.62721e-07	2.6406e-05			PRR14L	0.676042	3.91e-38	3.2e-36			NEDD9	-0.425528	3.38126e-25	2.86695e-23			SORCS2	-0.646803	2.90604e-25	2.07634e-23
BMF	-0.632304	4.89366e-07	2.78286e-05			CASC10	-0.950558	4.17e-38	3.4e-36			RIMS4	-0.600291	3.52532e-25	2.97865e-23			MAP1LC3B	0.673694	3.00799e-25	2.14166e-23
IMPG2	1.06545	5.18937e-07	2.9407e-05			TFRC	0.439186	4.52e-38	3.67e-36			DNTTIP2	0.501095	5.10373e-25	4.29727e-23			KCTD9	0.744511	3.12e-25	2.21368e-23
KLF15	0.652361	5.26753e-07	2.97459e-05			PSMC5	0.48882	4.6e-38	3.72e-36			PLEKHG4B	-0.65871	5.24277e-25	4.39901e-23			ADAM9	0.583399	3.46831e-25	2.45226e-23
AC027031.2	0.698766	5.3629e-07	3.01794e-05			CXXC5	-0.636329	4.84e-38	3.9e-36			LY6E	-0.687877	5.26233e-25	4.40015e-23			DYRK1A	0.576107	4.13415e-25	2.91293e-23
CAVIN2	-0.603493	5.74842e-07	3.21901e-05			ESPL1	-0.611283	5.55e-38	4.46e-36			CLIP1	0.592319	5.28801e-25	4.40637e-23			RBM38	-0.557714	4.9754e-25	3.49359e-23
CCL28	-0.543407	5.75994e-07	3.21901e-05			BNIP2	0.513716	5.95e-38	4.77e-36			EAF1	0.687267	5.47386e-25	4.54556e-23			TMEM120A	0.528432	5.19873e-25	3.63786e-23
PCDH9	-0.767704	5.93035e-07	3.30286e-05			NIPAL3	0.693052	6.23e-38	4.97e-36			CAPN2	-0.508496	5.50985e-25	4.55978e-23			CA12	2.80199	5.61435e-25	3.91524e-23
SRD5A3	-0.733674	6.16889e-07	3.42394e-05			SSNA1	0.748382	6.39e-38	5.08e-36			ALDH3B1	-0.715898	5.76687e-25	4.75619e-23			AC093323.1	0.526252	5.95726e-25	4.1402e-23
SULF1	-0.425917	6.36797e-07	3.52238e-05			UBR3	0.628653	6.61e-38	5.24e-36			LRRFIP2	0.572253	6.34942e-25	5.21884e-23			ATP1B1	0.688466	6.00125e-25	4.15658e-23
ZNF629	-0.645016	6.44759e-07	3.55429e-05			TRAK1	-0.546686	7.4e-38	5.84e-36			RBM38	-0.531948	6.37861e-25	5.22506e-23			IFITM10	1.44618	7.00104e-25	4.82734e-23
SAA2	2.08982	6.93637e-07	3.81077e-05			LAMP2	0.534814	8.75e-38	6.89e-36			AOX1	-0.972128	6.45802e-25	5.27223e-23			LINC02009	2.71379	7.0171e-25	4.82734e-23
RSPO3	-1.10258	7.13017e-07	3.90401e-05			INCENP	0.536314	9.38e-38	7.37e-36			BTBD2	-0.570738	6.5172e-25	5.296e-23			RAE1	0.451846	7.9484e-25	5.4496e-23
TGM2	-0.448723	7.23205e-07	3.94646e-05			BACH1	0.724818	1e-37	7.84e-36			FABP3	-0.655129	6.53097e-25	5.296e-23			TRIM54	1.69355	9.88021e-25	6.75137e-23
ZFP36L1	-0.37068	7.45533e-07	4.05465e-05			SEC24A	0.511213	1.09e-37	8.53e-36			WBP2	0.537529	8.14355e-25	6.58157e-23			NUP205	-0.534848	1.22309e-24	8.32968e-23
CITED2	-0.430496	8.17001e-07	4.41509e-05			NEDD9	-0.436202	2.57e-37	2e-35			APMAP	0.479071	9.75989e-25	7.86159e-23			CYR61	0.647721	1.30053e-24	8.82758e-23
KLK10	0.641675	8.17256e-07	4.41509e-05			RNF114	0.457533	2.84e-37	2.2e-35			ZNF143	0.523965	1.02745e-24	8.24863e-23			CALCOCO1	-0.656355	1.49691e-24	1.01267e-22
PDGFD	-0.457295	8.26178e-07	4.44846e-05			LY6E	-0.655512	2.9e-37	2.24e-35			TALDO1	0.560186	1.1051e-24	8.84263e-23			USF3	0.712724	1.50497e-24	1.01476e-22
AMIGO2	-0.653035	8.53933e-07	4.58268e-05			VPS37A	0.708784	3.46e-37	2.67e-35			PRR14L	0.587415	1.1453e-24	9.13406e-23			LAMP1	0.444392	1.51233e-24	1.01636e-22
CHI3L1	-0.614713	8.65388e-07	4.61419e-05			MAP3K2	0.607596	4.14e-37	3.17e-35			SERINC3	0.440848	1.21739e-24	9.67703e-23			PLEKHG4B	-0.717257	1.64339e-24	1.1008e-22
PLEKHA4	-0.530399	8.67783e-07	4.61419e-05			B4GALNT1	0.873937	7.79e-37	5.96e-35			GAS1	-0.667399	1.23861e-24	9.81347e-23			RNF19B	0.683358	1.69597e-24	1.1323e-22
SRP68	-0.405206	8.68347e-07	4.61419e-05			HTATIP2	0.750657	8.51e-37	6.49e-35			SORT1	0.419095	1.46674e-24	1.15829e-22			POP1	0.770597	1.70871e-24	1.13708e-22
AC012499.1	0.685561	9.03237e-07	4.78391e-05			DYNC1I1	1.92098	8.78e-37	6.67e-35			DDIAS	0.594299	1.8373e-24	1.4462e-22			SERINC3	0.448202	1.72859e-24	1.14656e-22
MCU	-0.432292	9.10254e-07	4.80537e-05			KCNK5	0.561176	9.49e-37	7.18e-35			SMAD6	-0.675736	1.86167e-24	1.46062e-22			WFS1	0.60761	2.37038e-24	1.56714e-22
SLC20A1	0.420543	9.17127e-07	4.82593e-05			GSR	0.52727	9.69e-37	7.31e-35			RHEB	0.475872	2.08356e-24	1.62942e-22			VSIR	-0.935794	2.45303e-24	1.61498e-22
FAM219A	0.503047	9.83501e-07	5.15845e-05			FLG	-0.668202	9.88e-37	7.43e-35			ABCA7	0.678177	2.09272e-24	1.63131e-22			TMSB4X	0.49707	2.4586e-24	1.61498e-22
RIPK4	-0.46138	9.95522e-07	5.19383e-05			C3orf58	0.663446	1.12e-36	8.38e-35			SNHG16	0.443011	2.46614e-24	1.91621e-22			ATP6V0B	0.466672	2.67505e-24	1.75151e-22
NPY1R	2.13515	9.96656e-07	5.19383e-05			FLOT2	-0.549248	1.32e-36	9.89e-35			PSMC4	0.4903	2.69218e-24	2.08514e-22			AGO2	0.52172	2.73134e-24	1.78264e-22
NAP1L3	-0.609609	1.03272e-06	5.35903e-05			KBTBD8	1.50723	1.53e-36	1.14e-34			RBP1	-0.648388	2.71508e-24	2.09617e-22			GOLGA7	0.605208	3.22809e-24	2.10011e-22
EMP1	-0.465542	1.03497e-06	5.35903e-05			GHITM	0.439674	1.62e-36	1.2e-34			ASS1	-0.468178	2.7633e-24	2.1266e-22			MEIS1	-0.50304	3.28719e-24	2.13176e-22
MYO1D	0.542023	1.10657e-06	5.71153e-05			AAK1	0.615422	1.67e-36	1.23e-34			MEOX1	-1.2808	2.77981e-24	2.13251e-22			DNAJB11	0.548725	3.77851e-24	2.4426e-22
CPS1	-0.481602	1.13298e-06	5.82925e-05			SERINC3	0.458454	1.87e-36	1.38e-34			LMO3	-0.872731	2.85303e-24	2.18175e-22			ASPSCR1	0.53696	4.42701e-24	2.84624e-22
BMP7	-0.465505	1.16256e-06	5.96255e-05			LTA4H	-0.456783	1.99e-36	1.46e-34			EFEMP1	-0.566932	2.95177e-24	2.25014e-22			CALU	0.487797	4.43086e-24	2.84624e-22
ACOT11	-0.987491	1.18783e-06	6.0729e-05			SDCBP	0.506823	2.08e-36	1.52e-34			NIPAL3	0.578085	3.11499e-24	2.3671e-22			EAF1	0.699899	5.17733e-24	3.31528e-22
SAMD12	-0.532366	1.19784e-06	6.10483e-05			AGO3	0.581357	3.57e-36	2.61e-34			PSME4	0.5403	3.86921e-24	2.93102e-22			KDM6B	0.5739	5.25786e-24	3.3563e-22
MXRA5	-2.09757	1.23778e-06	6.28861e-05			MDM2	0.638718	5.26e-36	3.83e-34			SELENOS	0.575216	3.95914e-24	2.98977e-22			RNF114	0.437497	6.0112e-24	3.82519e-22
GJA1	3.78318	1.37749e-06	1			IDH1	0.554203	5.43e-36	3.94e-34			ASPSCR1	0.541787	4.5342e-24	3.41336e-22			HMOX1	1.25027	8.58828e-24	5.44808e-22
DOK7	-0.751981	1.4134e-06	7.15841e-05			SOX12	-0.616976	7.29e-36	5.28e-34			ESPL1	-0.551936	4.57841e-24	3.43594e-22			SERTAD2	0.591281	9.18786e-24	5.81032e-22
RN7SL4P	1.14378	1.51473e-06	7.64775e-05			PQLC2	0.68427	9.43e-36	6.8e-34			ADIPOR1	0.437791	4.80778e-24	3.5969e-22			PPP3CA	0.618266	1.00383e-23	6.32846e-22
F3	0.923078	1.54226e-06	7.76254e-05			ASCC1	0.514615	1.74e-35	1.25e-33			SBNO1	0.550876	5.14762e-24	3.83926e-22			ERBB2	-0.554227	1.13731e-23	7.14788e-22
LINC01320	0.771458	1.62567e-06	8.15702e-05			CENPX	0.571543	1.87e-35	1.34e-33			KCTD1	-0.497633	5.27e-24	3.91845e-22			NRDC	0.420102	1.29568e-23	8.11813e-22
FAM43A	-1.49669	1.72309e-06	8.61915e-05			IFITM10	1.56649	2.37e-35	1.69e-33			TUBB4B	0.568252	5.57117e-24	4.12967e-22			PRR14L	0.576371	1.69389e-23	1.05806e-21
TMCO4	-0.517983	1.73428e-06	8.64847e-05			PLEKHB2	0.470489	2.71e-35	1.93e-33			NFIX	-0.489209	5.688e-24	4.20338e-22			RHEBP2	0.684198	1.70737e-23	1.06322e-21
TMPRSS2	-1.9342	1.74152e-06	8.65794e-05			ITGB1	0.458202	2.73e-35	1.94e-33			OTUD7B	0.529748	6.22207e-24	4.58403e-22			EZR	0.452749	1.72492e-23	1.07087e-21
COL11A2	-0.850959	1.79389e-06	8.89098e-05			KCTD1	-0.539488	2.8e-35	1.99e-33			IL15RA	0.898609	6.87446e-24	5.04928e-22			LY6E	-0.621344	1.89972e-23	1.17581e-21
PLEKHS1	4.71312	1.80146e-06	1			CASP4	0.615931	3.02e-35	2.13e-33			LAMP2	0.510733	8.34151e-24	6.10826e-22			JUN	0.445793	2.04066e-23	1.25921e-21
PRDM11	-0.697395	1.86113e-06	9.19616e-05			GOLT1B	0.599588	3.1e-35	2.18e-33			TMEM26	-0.827126	8.4444e-24	6.16492e-22			CTSC	0.460671	2.07575e-23	1.27699e-21
C8orf31	-1.26758	2.00425e-06	9.8605e-05			MEA1	0.450056	3.14e-35	2.2e-33			PCDH17	2.37207	8.86196e-24	6.45028e-22			EPS8L2	-0.59723	2.16756e-23	1.32946e-21
SYP	0.420712	2.00775e-06	9.8605e-05			RNF19B	0.773812	3.15e-35	2.21e-33			AKR1C1	2.21779	9.1202e-24	6.6183e-22			AKR1B1	0.457407	2.42642e-23	1.48376e-21
KCTD17	-0.733586	2.01548e-06	9.86856e-05			AFF4	0.522815	3.38e-35	2.36e-33			DLGAP3	-0.64468	1.01541e-23	7.34654e-22			SLC35B4	-0.635554	2.49383e-23	1.52042e-21
LRRC75A	-0.869136	2.0475e-06	9.99512e-05			MDM4	0.571806	4.01e-35	2.79e-33			LGR5	-0.435892	1.1169e-23	8.05666e-22			SNHG16	0.456613	2.53207e-23	1.53912e-21
MSRB2	-0.534856	2.10525e-06	0.000102462			UBN2	0.570759	4.15e-35	2.88e-33			AL390728.4	0.637923	1.17649e-23	8.4613e-22			PSMC5	0.523154	2.71383e-23	1.64469e-21
TLE2	-0.518142	2.1431e-06	0.000103992			MEIS1	-0.526993	4.41e-35	3.05e-33			LINC02009	2.45171	1.32407e-23	9.49441e-22			KCNK5	0.561436	2.76622e-23	1.67147e-21
KLK5	-1.18677	2.19776e-06	0.000106325			SSR1	0.469199	4.72e-35	3.26e-33			IGF2R	0.445711	1.50367e-23	1.07503e-21			BBOX1	-0.791259	2.87312e-23	1.73093e-21
RILP	-0.603081	2.21141e-06	0.000106668			MTA1	-0.502663	5.15e-35	3.54e-33			ADORA1	-1.12361	1.54903e-23	1.1042e-21			LMOD1	-0.658846	3.13605e-23	1.88376e-21
ZNF486	2.84279	2.24329e-06	1			UBE2K	0.530197	5.26e-35	3.6e-33			CTSC	0.434789	1.55478e-23	1.10504e-21			RHEB	0.59321	3.16108e-23	1.89321e-21
MYO1C	-0.458412	2.36496e-06	0.00011372			AJAP1	-0.608856	5.44e-35	3.72e-33			GDAP2	0.701377	1.85823e-23	1.31684e-21			BCL9	0.529323	3.54937e-23	2.11953e-21
AHNAK2	-0.557159	2.37165e-06	0.00011372			PABPC4	-0.535202	5.67e-35	3.86e-33			POU5F1	0.843445	2.09506e-23	1.48033e-21			SLC2A12	-0.655823	3.59289e-23	2.13924e-21
ARHGAP23	-0.472589	2.39342e-06	0.000114425			GNL2	0.435816	7.76e-35	5.27e-33			MED8	0.564111	2.22426e-23	1.56703e-21			IDH1	0.497415	4.21702e-23	2.50353e-21
KALRN	0.414697	2.47405e-06	0.000117932			UBQLN1	0.474144	8.17e-35	5.54e-33			AL451060.1	2.16677	2.34223e-23	1.64535e-21			AHCYL1	0.39816	4.73902e-23	2.80525e-21
DOK6	-0.590733	2.49011e-06	0.00011835			DYRK1A	0.617472	8.4e-35	5.68e-33			PES1	-0.527916	2.85185e-23	1.99754e-21			PNPLA8	0.560425	5.78892e-23	3.41681e-21
MAFG	0.399609	2.50036e-06	0.000118489			YIPF2	0.559418	1.13e-34	7.6e-33			CREM	0.494901	2.90821e-23	2.03112e-21			SPR	-0.636177	7.09884e-23	4.17785e-21
LRRK1	-0.47077	2.64329e-06	0.000124897			PSMC6	0.502368	1.25e-34	8.4e-33			FAXDC2	-0.627972	2.97432e-23	2.07131e-21			SLC41A1	0.427032	7.75654e-23	4.55177e-21
NR4A1	0.540329	2.6883e-06	0.000126655			USF3	0.779493	1.26e-34	8.42e-33			FAM189B	-0.539732	3.00512e-23	2.08674e-21			LIPG	1.76283	9.91159e-23	5.7997e-21
NTF3	-0.782423	2.70376e-06	0.000127014			DOC2B	-0.995366	1.83e-34	1.22e-32			IGSF8	0.647668	3.38655e-23	2.34487e-21			KIAA1551	-0.566523	1.03242e-22	6.02384e-21
DHRS11	-0.509435	2.75829e-06	0.000129201			GTF3C5	0.620167	2.58e-34	1.72e-32			BUD23	0.466178	3.97735e-23	2.74608e-21			RTL5	-1.12343	1.07373e-22	6.24695e-21
CADM2	-0.574838	3.12748e-06	0.000146072			CYR61	0.660675	2.83e-34	1.88e-32			SNX29	0.658109	4.49623e-23	3.09548e-21			QSOX1	0.437144	1.38491e-22	8.03442e-21
CRYAB	0.604047	3.1615e-06	0.000147237			ZNF678	0.823231	2.91e-34	1.93e-32			PROS1	0.585651	5.13402e-23	3.52453e-21			ALDH7A1	-0.407365	1.53177e-22	8.86118e-21
LBH	-0.393795	3.2465e-06	0.000150762			FGF18	-0.729255	3.2e-34	2.11e-32			PSMD14	0.435799	5.59043e-23	3.82699e-21			ACTB	0.39863	1.58908e-22	9.16669e-21
CYP4V2	-0.697561	3.29313e-06	0.000152491			RAB2B	0.739736	3.37e-34	2.22e-32			ORAI2	-0.45532	5.72899e-23	3.91076e-21			ADAMTS4	1.26315	1.85672e-22	1.06804e-20
R3HCC1	-0.762352	3.31082e-06	0.000152873			RIMS4	-0.784574	3.81e-34	2.5e-32			FLG	-0.54051	6.30204e-23	4.28982e-21			NFKB2	0.435649	1.87182e-22	1.07077e-20
LAMP2	0.460192	3.41808e-06	0.000157377			DDIAS	0.748454	4.19e-34	2.74e-32			USF3	0.68173	6.61941e-23	4.4932e-21			BLOC1S2	0.577418	1.872e-22	1.07077e-20
SRRM3	-1.04576	3.44804e-06	0.000158307			SLC29A2	-0.746235	4.23e-34	2.76e-32			ELFN2	-1.37296	7.15043e-23	4.84006e-21			TSPAN1	-0.587384	1.9326e-22	1.10234e-20
IFI44L	-0.941258	3.46242e-06	0.000158518			NME4	-0.812927	4.71e-34	3.07e-32			IDH1	0.478805	7.25864e-23	4.89959e-21			KIF21A	0.626769	2.18096e-22	1.24053e-20
NCK2	-0.636745	3.55564e-06	0.000162328			BTBD10	0.645374	4.86e-34	3.15e-32			TLE2	-0.727294	8.03171e-23	5.4063e-21			ZFAND5	0.542787	2.86394e-22	1.62447e-20
ENPP3	4.5217	3.67231e-06	1			CALCOCO1	-0.65758	6.54e-34	4.23e-32			PCDH10	1.36499	8.37386e-23	5.62096e-21			ZFP36	0.578827	3.01479e-22	1.70528e-20
NRTN	0.835822	3.69623e-06	0.000168272			XBP1	0.57766	6.82e-34	4.4e-32			NR1D1	1.05205	8.68882e-23	5.81621e-21			GTF3C5	0.620602	3.07455e-22	1.73427e-20
TINAGL1	-0.481413	3.74691e-06	0.000170101			SERPINE2	-0.550563	6.87e-34	4.42e-32			PHF1	0.555233	8.80835e-23	5.87994e-21			CRTAP	-0.375575	3.12443e-22	1.75754e-20
PSAT1	0.391825	3.81204e-06	0.000172574			NOMO2	0.625136	6.99e-34	4.49e-32			PDIA4	0.379451	8.90778e-23	5.92993e-21			LTA4H	-0.408365	3.43661e-22	1.92703e-20
SNAPIN	-0.455363	4.01319e-06	0.000181175			PPP2CA	0.467809	7.07e-34	4.53e-32			SAMD9L	1.35059	9.0522e-23	6.00951e-21			ZBTB43	0.758596	3.44585e-22	1.92703e-20
USP40	-0.632334	4.15022e-06	0.00018684			WWP1	0.624765	7.21e-34	4.61e-32			PNPLA8	0.510364	9.71965e-23	6.43494e-21			GHITM	0.374693	3.45414e-22	1.92703e-20
KANK2	-0.48464	4.178e-06	0.00018757			UBXN4	0.558689	8.57e-34	5.46e-32			LAMP1	0.401335	9.93063e-23	6.55666e-21			SLC7A5	0.545323	3.80094e-22	2.11471e-20
SMAD6	-0.517938	4.19725e-06	0.000187914			SNX17	-0.50171	8.61e-34	5.47e-32			SLC2A12	-0.59731	1.169e-22	7.69722e-21			MOCS2	0.447612	4.16639e-22	2.31172e-20
PADI2	-0.769802	4.28066e-06	0.00019112			YPEL5	0.545052	9.36e-34	5.93e-32			LRRN2	-0.884808	1.22162e-22	8.02186e-21			LARP4	0.584136	4.34432e-22	2.4039e-20
CUX1	-0.378832	4.529e-06	0.000201586			WDR74	0.622758	1.19e-33	7.54e-32			XDH	0.628811	1.24355e-22	8.14374e-21			CEBPB	0.679006	4.50811e-22	2.48777e-20
CLIC3	-1.5766	4.53994e-06	0.000201586			GLG1	0.478243	1.32e-33	8.31e-32			LIG4	0.567335	1.29142e-22	8.43439e-21			CRIM1	0.473041	5.07188e-22	2.79132e-20
ITGA3	-0.462374	4.61281e-06	0.000204262			CTSC	0.477131	1.39e-33	8.74e-32			NAT14	-0.70119	1.53796e-22	1.00174e-20			SRXN1	1.06499	5.42534e-22	2.97779e-20
KIF12	-0.653995	4.64715e-06	0.000205222			ACBD3	0.480084	1.56e-33	9.79e-32			ATP1B1	0.622407	2.23638e-22	1.45275e-20			ZSWIM4	0.636482	5.58708e-22	3.05832e-20
LRRC32	-1.33578	4.85903e-06	0.000213995			AKR1B10	1.96393	1.62e-33	1.01e-31			TENT5A	0.540436	2.27221e-22	1.47206e-20			GM2A	0.454199	5.78532e-22	3.15835e-20
SSTR1	-0.654108	4.9012e-06	0.000215268			AZIN1	0.464753	1.7e-33	1.06e-31			SERTAD2	0.514226	2.40303e-22	1.55265e-20			PLEKHA4	-0.611574	5.98163e-22	3.25679e-20
LINC02600	-1.47038	4.91688e-06	0.000215373			ARL4C	-0.662329	2.55e-33	1.59e-31			SEMA6C	-0.877227	2.42078e-22	1.55995e-20			IGF2R	0.448686	6.59334e-22	3.58027e-20
PLEKHG4	-0.565183	5.05464e-06	0.00022081			CRB2	-0.851177	2.58e-33	1.6e-31			PCK1	-0.509734	2.44777e-22	1.57315e-20			BPNT1	0.444816	6.91128e-22	3.74294e-20
EPS8L1	-0.532269	5.20311e-06	0.000226685			MYH14	0.998011	2.68e-33	1.66e-31			C19orf48	-0.611395	2.54217e-22	1.62948e-20			SLC25A25	0.69327	7.09578e-22	3.83266e-20
AVPR2	-0.712554	5.24912e-06	0.000228076			GOLGA2	0.64729	3e-33	1.85e-31			FLOT2	-0.472695	2.61059e-22	1.66891e-20			AMBP	0.822899	7.7655e-22	4.1833e-20
NTNG1	-1.04089	5.28816e-06	0.000229158			NUCKS1	-0.512633	3.63e-33	2.23e-31			SYNJ1	0.598679	2.70242e-22	1.72306e-20			LRRK1	-0.6136	7.97501e-22	4.28483e-20
LINC00638	-1.64625	5.41501e-06	0.00023403			PRSS23	0.520439	3.98e-33	2.44e-31			RNF19B	0.633129	2.74003e-22	1.74245e-20			PIM2	0.565024	8.13275e-22	4.35808e-20
ENO2	0.44175	5.5556e-06	0.000239467			STK40	0.527816	5.15e-33	3.15e-31			SPTY2D1	0.535801	3.18964e-22	2.02303e-20			METRN	-0.839356	8.20459e-22	4.38403e-20
EPPIN	2.90321	5.6303e-06	1			ZSWIM4	0.661935	5.21e-33	3.18e-31			RTL5	-1.04918	3.55327e-22	2.24777e-20			CWC25	0.582131	8.22422e-22	4.38403e-20
CALB1	0.456087	5.93166e-06	0.000254998			SLC1A3	-0.707288	6.01e-33	3.66e-31			GADD45GIP1	-0.55967	4.03976e-22	2.54885e-20			TAF2	0.468833	8.29086e-22	4.40801e-20
NEU3	0.408813	6.14733e-06	0.000263571			ASB13	-0.793558	8.85e-33	5.37e-31			SQSTM1	0.471608	4.18509e-22	2.63366e-20			AJAP1	-0.546719	8.35735e-22	4.43179e-20
EFNB2	-0.364628	6.24469e-06	0.000266696			SAMD9L	1.57582	1.09e-32	6.63e-31			NREP	-0.691601	4.23261e-22	2.65665e-20			LIG4	0.638975	8.9977e-22	4.75897e-20
BTG3	0.449695	6.25314e-06	0.000266696			BRD2	0.405212	1.18e-32	7.15e-31			MLXIPL	-0.912257	4.52348e-22	2.83186e-20			MEOX1	-1.37816	9.48891e-22	5.00577e-20
MECOM	-0.404194	6.36952e-06	0.000270947			CLDN1	0.491736	1.26e-32	7.6e-31			MAPRE2	0.593353	4.60919e-22	2.87806e-20			SERPINF2	1.94138	1.02249e-21	5.3801e-20
PREX2	0.728841	6.61228e-06	0.000280537			PSMD6	0.566255	1.33e-32	8e-31			TMSB4X	0.486143	4.71151e-22	2.93437e-20			ZNF608	-0.539695	1.07995e-21	5.66777e-20
PARD3B	-0.490739	6.68334e-06	0.000282812			C6orf62	0.418818	1.43e-32	8.58e-31			MGAT3	-0.562876	4.76195e-22	2.95816e-20			ALDH2	0.515123	1.1039e-21	5.77857e-20
SDE2	0.44569	6.78159e-06	0.000286222			KIAA1551	-0.576178	1.47e-32	8.8e-31			RAB5IF	0.599228	4.8506e-22	3.00551e-20			HAUS8	0.724918	1.1088e-21	5.78938e-20
LINC01915	-2.68476	6.80278e-06	1			ACYP2	0.696416	2.19e-32	1.31e-30			KIF21A	0.568523	5.20982e-22	3.21983e-20			LAMP2	0.522962	1.21925e-21	6.34978e-20
NTSR1	-0.63539	6.80715e-06	0.000286554			OSBP	0.484925	2.49e-32	1.48e-30			AGO2	0.470277	6.76816e-22	4.17226e-20			SPATA5	0.774157	1.33925e-21	6.95695e-20
ATPAF1	-0.378382	7.02998e-06	0.000295168			TFPI2	1.11475	2.53e-32	1.5e-30			BTAF1	0.377212	6.95738e-22	4.278e-20			KCTD1	-0.494581	1.35181e-21	7.00431e-20
STAC2	-1.35136	7.05428e-06	0.000295423			TRIM54	1.8041	2.71e-32	1.6e-30			ZNF618	-0.481465	7.09415e-22	4.35102e-20			MSRB3	-0.794435	1.36918e-21	7.07632e-20
SHISAL1	-1.03942	7.71442e-06	0.000322236			KLHDC3	-0.467146	2.95e-32	1.74e-30			SRXN1	1.01195	7.15226e-22	4.37556e-20			STK40	0.489582	1.40935e-21	7.26546e-20
HYOU1	0.338413	7.97788e-06	0.000332384			FAM189B	-0.704319	3.1e-32	1.82e-30			DYRK1A	0.515663	7.74784e-22	4.72794e-20			UBFD1	0.434754	1.46488e-21	7.53268e-20
CTSH	-0.534777	8.10155e-06	0.000336671			H6PD	-0.646839	3.38e-32	1.98e-30			PKD2	-0.774184	8.53435e-22	5.19477e-20			NCSTN	0.42788	1.51746e-21	7.78341e-20
LHX1-DT	-0.563326	8.17031e-06	0.00033866			RAB18	0.468612	3.94e-32	2.31e-30			USP32	0.503555	8.70736e-22	5.28677e-20			MTO1	0.495181	1.62682e-21	8.32334e-20
GNG12	-0.574651	8.19635e-06	0.000338873			TLE2	-0.771629	5.05e-32	2.95e-30			HMOX1	1.04874	1.1235e-21	6.80434e-20			SORCS1	0.885063	1.64752e-21	8.40812e-20
LAMC3	-0.541726	8.29762e-06	0.000342187			ERLEC1	0.559679	5.35e-32	3.12e-30			PPP3CA	0.597858	1.31674e-21	7.95478e-20			COPS3	0.491705	1.74255e-21	8.8709e-20
FLRT3	-1.21039	8.80739e-06	0.000362288			SLC25A25	0.774022	5.49e-32	3.19e-30			HAUS8	0.683547	1.33835e-21	8.06515e-20			NCAPG2	0.496212	1.8482e-21	9.38525e-20
PDZD2	-0.497581	8.96785e-06	0.000367954			YWHAZ	0.408434	6.27e-32	3.64e-30			UBQLN4	-0.454305	1.50521e-21	9.04812e-20			EDEM2	0.446381	1.89035e-21	9.57541e-20
ZBTB42	-0.578564	9.22241e-06	0.000377444			LIN7C	0.698654	6.72e-32	3.89e-30			AKR1B10	1.61456	1.57091e-21	9.41961e-20			NR1D1	1.12958	1.9395e-21	9.8e-20
RAG2	2.70159	9.24182e-06	1			ATAD2	0.457132	6.83e-32	3.94e-30			LAMA2	-0.454805	1.71013e-21	1.0229e-19			TJP3	-0.66276	2.00343e-21	1.0098e-19
SAMD5	-0.831696	9.37854e-06	0.000382867			TINF2	0.584632	6.99e-32	4.02e-30			ATP6V1A	0.561735	2.06511e-21	1.23218e-19			CAPN2	-0.510439	2.1736e-21	1.09287e-19
ST6GALNAC5	3.37403	9.70729e-06	1			XDH	0.729177	7.22e-32	4.15e-30			CALU	0.427939	2.13734e-21	1.27214e-19			UGGT1	0.445154	2.22117e-21	1.11403e-19
SOX15	-0.859898	9.7348e-06	0.000396412			RBM11	1.11559	7.69e-32	4.41e-30			CD63	0.44945	2.38499e-21	1.41605e-19			EFEMP1	-0.551314	2.23105e-21	1.11624e-19
ACADVL	-0.41135	9.81186e-06	0.000398548			GTF2B	0.79442	8.46e-32	4.83e-30			SLC39A6	0.383565	2.45691e-21	1.45518e-19			GSR	0.492753	2.54625e-21	1.27082e-19
GSDME	-0.632332	1.02478e-05	0.000415215			AGO2	0.515361	8.78e-32	5.01e-30			FGF18	-0.585405	2.93397e-21	1.73348e-19			TEAD1	-0.452247	2.5562e-21	1.27266e-19
NANOS1	-0.916219	1.06124e-05	0.000428914			TOX	-0.607129	9.4e-32	5.34e-30			PRDX1	0.45264	3.23726e-21	1.90801e-19			GNL2	0.376322	2.6564e-21	1.31932e-19
KCTD16	0.720477	1.06547e-05	0.000429552			ATP10D	0.699721	9.87e-32	5.6e-30			AC007923.1	2.09514	3.75624e-21	2.2085e-19			TENT5A	0.666113	2.74505e-21	1.36004e-19
OGFOD3	-0.431923	1.10074e-05	0.000442672			BOC	-0.5964	1.06e-31	5.98e-30			UBFD1	0.409501	3.88007e-21	2.27577e-19			WDR74	0.580991	2.77127e-21	1.36969e-19
CDHR1	0.879828	1.10733e-05	0.00044422			MGAT4B	-0.505967	1.14e-31	6.46e-30			WFS1	0.552299	4.04351e-21	2.3659e-19			TIPARP	0.750244	3.03532e-21	1.49657e-19
PDGFC	-0.445848	1.11782e-05	0.000447321			SPR	-0.63786	1.34e-31	7.54e-30			SAA1	1.511	4.20672e-21	2.45545e-19			EIF4A3	0.466208	3.90766e-21	1.92202e-19
LAMB2	-0.416222	1.17632e-05	0.000469572			TFEC	1.82063	1.35e-31	7.58e-30			ABCB6	0.998656	4.4228e-21	2.57535e-19			YIPF2	0.537942	4.01699e-21	1.97104e-19
SUSD2	-0.666901	1.18577e-05	0.000471815			TJP3	-0.66469	1.43e-31	8e-30			AL161431.1	1.37601	4.97592e-21	2.89046e-19			HGSNAT	-0.705011	5.39889e-21	2.64273e-19
NTN4	-0.648749	1.18776e-05	0.000471815			LRRFIP2	0.685932	1.46e-31	8.18e-30			GM2A	0.444564	5.07119e-21	2.93873e-19			ETV3	0.494236	5.68908e-21	2.7781e-19
NCBP3	-0.416532	1.23697e-05	0.00049016			NREP	-0.866191	1.49e-31	8.34e-30			EGR1	0.909526	5.2442e-21	3.03172e-19			SORBS3	-0.67773	5.85165e-21	2.85065e-19
CPA3	-1.22062	1.28903e-05	0.000509546			EZR	0.428167	1.64e-31	9.11e-30			SCGB2A1	5.70653	5.34866e-21	3.08103e-19			AKR1C1	2.35176	6.03627e-21	2.93357e-19
TIPARP	0.476278	1.34113e-05	0.00052885			DNMT3B	0.811253	1.68e-31	9.32e-30			OSBP	0.444659	5.35498e-21	3.08103e-19			EXT2	0.496631	6.14775e-21	2.98063e-19
LIN7A	-0.640416	1.40046e-05	0.000550902			ACADVL	-0.406382	1.83e-31	1.01e-29			TRAK1	-0.482723	6.04927e-21	3.47222e-19			KMT2D	0.452215	6.17709e-21	2.98775e-19
SLC2A5	-1.46049	1.50356e-05	0.00059003			ELK4	0.500706	2.19e-31	1.21e-29			SPRED3	0.947666	6.11082e-21	3.49924e-19			GATAD2B	0.551834	6.50023e-21	3.13659e-19
AL137793.1	2.73621	1.53566e-05	1			FASTK	-0.678678	2.58e-31	1.42e-29			ERBB2	-0.497511	6.42433e-21	3.67007e-19			UBE4A	0.488465	6.56175e-21	3.15879e-19
APOBEC3C	-0.394476	1.55886e-05	0.000610253			TMCO1	0.430217	2.63e-31	1.45e-29			UBQLN1	0.391398	6.46257e-21	3.68321e-19			UBE2C	0.414657	6.88559e-21	3.30687e-19
CELSR2	-0.435861	1.57239e-05	0.000614067			WTIP	-0.679134	2.81e-31	1.54e-29			AL139289.1	1.20474	6.58572e-21	3.74456e-19			HLA-C	0.472803	6.95866e-21	3.3341e-19
DLX1	0.653179	1.59928e-05	0.000623067			COPS3	0.55194	2.94e-31	1.61e-29			TFRC	0.382343	7.27924e-21	4.12917e-19			DERL1	0.411534	7.0603e-21	3.37485e-19
FNDC4	-0.745657	1.60769e-05	0.000624839			EMC3	0.544396	3.31e-31	1.81e-29			AAK1	0.550118	7.33909e-21	4.15338e-19			JMJD6	0.470178	7.31314e-21	3.48753e-19
CSRP1	-0.407552	1.65782e-05	0.000642782			TIMP2	-0.551634	3.66e-31	1.99e-29			MYO1D	0.688626	7.37116e-21	4.16178e-19			CALB1	0.66529	7.52444e-21	3.57991e-19
ORAI3	-0.585183	1.72587e-05	0.000667569			EFEMP1	-0.629223	3.72e-31	2.02e-29			ZFP36	0.542769	8.20759e-21	4.62323e-19			ZC3H12A	0.751658	7.89256e-21	3.7463e-19
FRY	-0.681845	1.73514e-05	0.000669559			ATP6V1D	0.607154	3.74e-31	2.03e-29			AC007996.1	-0.787532	8.99271e-21	5.0537e-19			PLEKHB2	0.411452	8.00309e-21	3.78993e-19
AP000432.1	1.97091	1.7598e-05	0.00067746			TMEM38A	-0.602624	4.09e-31	2.21e-29			ZNF460	1.4879	9.25163e-21	5.18714e-19			ZNF562	0.469713	8.11245e-21	3.8328e-19
DUSP3	-0.365802	1.8764e-05	0.000720635			CLTB	0.429856	4.28e-31	2.31e-29			SSNA1	0.694724	1.09933e-20	6.1494e-19			PES1	-0.549715	8.28095e-21	3.90336e-19
ZNF252P	-0.462366	1.89921e-05	0.000727673			AGAP3	-0.467712	4.41e-31	2.37e-29			TMEM208	0.660947	1.16453e-20	6.49904e-19			NFIX	-0.456114	9.65752e-21	4.54171e-19
KCNJ5	-1.0904	2.01996e-05	0.000772112			TGIF1	0.729053	4.51e-31	2.42e-29			PSMA5	0.487593	1.20507e-20	6.6957e-19			ADRM1	0.50609	9.88378e-21	4.6374e-19
SLC1A2	2.22281	2.04567e-05	1			FNDC10	-1.08145	4.88e-31	2.61e-29			TNFRSF21	0.603271	1.20531e-20	6.6957e-19			ASB13	-0.671565	1.02197e-20	4.784e-19
INPP5J	-0.808106	2.04778e-05	0.000780905			SMAD6	-0.820347	5.02e-31	2.68e-29			LRP8	0.482105	1.2189e-20	6.75568e-19			HSPA6	1.15219	1.05269e-20	4.91647e-19
ISM2	-1.2589	2.05357e-05	0.000781271			SLC41A1	0.41208	5.32e-31	2.84e-29			EPB41	0.418175	1.40029e-20	7.74327e-19			DEDD2	0.544385	1.14276e-20	5.32493e-19
TOX	-0.358283	2.15986e-05	0.000819785			C9orf72	0.900122	5.4e-31	2.88e-29			INCENP	0.478615	1.43591e-20	7.9221e-19			FNDC3B	0.492135	1.14782e-20	5.3363e-19
IGSF8	0.435086	2.19904e-05	0.000832707			DDX27	0.435146	5.52e-31	2.93e-29			AP1M2	-0.527405	1.52502e-20	8.39455e-19			USP14	0.515264	1.16181e-20	5.38905e-19
ESPN	-0.630814	2.20998e-05	0.000834899			HAUS8	0.794779	6.89e-31	3.65e-29			GK	0.606246	1.98474e-20	1.09003e-18			B3GAT3	0.497507	1.20423e-20	5.57313e-19
ZDHHC1	-0.58388	2.23472e-05	0.00084228			MVP	-0.575778	7.36e-31	3.89e-29			COPS3	0.432138	2.54222e-20	1.39304e-18			SIRT7	0.472037	1.28293e-20	5.92388e-19
TJP3	-0.465591	2.242e-05	0.000843065			UBFD1	0.457509	7.67e-31	4.04e-29			ASCC1	0.422557	2.66884e-20	1.45911e-18			SORT1	0.365802	1.35234e-20	6.23025e-19
RCOR2	-1.13587	2.34798e-05	0.000880874			PSMA4	0.489289	7.72e-31	4.06e-29			OBSCN	-0.519005	2.67999e-20	1.4619e-18			GPR162	-0.828571	1.39184e-20	6.39775e-19
AHR	0.697446	2.38145e-05	0.000891368			SNHG16	0.438186	8.11e-31	4.26e-29			EXT2	0.468758	2.69794e-20	1.46837e-18			VWA7	0.806818	1.49685e-20	6.86494e-19
NR3C2	-0.637796	2.40617e-05	0.000897397			AC020916.1	0.588266	8.13e-31	4.26e-29			HDGF	-0.348054	2.94732e-20	1.60049e-18			EGR1	1.0137	1.51227e-20	6.92007e-19
PGR	1.41322	2.40864e-05	0.000897397			TMEM41B	0.63828	8.39e-31	4.39e-29			USP38	0.631983	3.30617e-20	1.79134e-18			TINF2	0.534901	1.76695e-20	8.06736e-19
FASTK	-0.440497	2.42832e-05	0.00090107			PITHD1	0.458483	8.82e-31	4.6e-29			GNL2	0.360552	3.50286e-20	1.89366e-18			VCPIP1	0.601033	2.08611e-20	9.50325e-19
FAM107A	0.339476	2.43029e-05	0.00090107			FAM168A	-0.508012	9.26e-31	4.82e-29			BLOC1S2	0.551587	3.6151e-20	1.94998e-18			CEP55	0.502824	2.2017e-20	1.00074e-18
CDKN1C	0.456199	2.43546e-05	0.00090107			USP14	0.565136	1.12e-30	5.79e-29			ADAMTS5	-0.70135	3.742e-20	2.0099e-18			XDH	0.6651	2.53815e-20	1.1511e-18
LRRTM4	1.41028	2.44073e-05	0.00090107			SPATA5	0.796083	1.22e-30	6.29e-29			ATOH8	-1.48108	3.74284e-20	2.0099e-18			SLC48A1	-0.604094	2.84248e-20	1.28626e-18
STK36	-0.387876	2.47642e-05	0.000912166			CWC25	0.607932	1.54e-30	7.97e-29			HGSNAT	-0.624719	3.89215e-20	2.08545e-18			LAP3	0.416232	2.93655e-20	1.32588e-18
2025-09-08	-0.373695	2.50144e-05	0.000919294			KLHL21	0.45164	1.73e-30	8.94e-29			ASPH	0.432296	3.97681e-20	2.1261e-18			ARFGAP3	0.680203	2.95292e-20	1.33032e-18
PSD4	-0.616815	2.52866e-05	0.000926675			ATP13A3	0.475431	1.95e-30	1e-28			TEAD1	-0.468189	4.19192e-20	2.23615e-18			FNDC10	-0.846315	3.06217e-20	1.37649e-18
HMGA2	-0.449467	2.53296e-05	0.000926675			ALDH7A1	-0.383823	2.2e-30	1.13e-28			HSPA6	0.966197	4.611e-20	2.45429e-18			ITGB1	0.407955	3.32759e-20	1.49251e-18
RGS9	-0.590453	2.64282e-05	0.000964688			CPEB4	0.527995	2.27e-30	1.16e-28			PLEKHB2	0.396333	4.75251e-20	2.52357e-18			2025-03-06	0.460555	3.63834e-20	1.6283e-18
SYTL1	-1.13317	2.78834e-05	0.00101552			ABHD4	0.575714	3.2e-30	1.64e-28			ITGB1	0.352602	4.76205e-20	2.52357e-18			TLE2	-0.710765	3.65377e-20	1.63162e-18
TMEM254	-0.548576	2.84197e-05	0.00103273			CSPG5	-0.67302	3.46e-30	1.76e-28			TNS2	-0.782478	4.92823e-20	2.60592e-18			STIL	0.447902	4.13928e-20	1.84438e-18
ARPIN	-0.702447	2.87e-05	0.00104058			CARD19	0.675336	3.83e-30	1.95e-28			ZNF383	-0.64662	5.76996e-20	3.04435e-18			SEC24A	0.483599	4.35623e-20	1.93681e-18
GABRE	-0.38297	2.87937e-05	0.00104165			MOCS2	0.502471	4.15e-30	2.11e-28			GNG12	-0.574112	5.78873e-20	3.04759e-18			PCDH17	2.42546	4.93838e-20	2.19086e-18
SCEL	-1.18256	2.91076e-05	0.00105066			ZBTB7B	0.511437	4.32e-30	2.19e-28			ERLEC1	0.464467	5.91987e-20	3.10986e-18			ALKBH5	0.530126	5.26227e-20	2.32947e-18
ARHGEF3	-0.420235	2.94421e-05	0.00106037			ADGRL1	-0.577406	4.6e-30	2.32e-28			UBC	0.462406	5.99417e-20	3.14206e-18			SAMD8	0.519721	5.53447e-20	2.44465e-18
POLR3A	0.307116	2.95726e-05	0.00106271			RSAD2	1.42261	4.71e-30	2.38e-28			EIF4A3	0.411371	6.03827e-20	3.15833e-18			CARD19	0.571943	5.54743e-20	2.44507e-18
AC078817.1	1.46271	3.02289e-05	0.00108389			APMAP	0.471796	4.94e-30	2.49e-28			TMEM120A	0.556471	6.07733e-20	3.1719e-18			SSR1	0.496707	5.92679e-20	2.60664e-18
LTB	-0.72634	3.05617e-05	0.00109341			REC8	-0.638402	4.97e-30	2.5e-28			PABPC4	-0.389878	6.82393e-20	3.55388e-18			AFF4	0.497888	6.11904e-20	2.68539e-18
CNDP2	0.33181	3.18799e-05	0.00113655			PPP1R26	-0.678177	4.98e-30	2.5e-28			METRN	-0.771199	7.166e-20	3.72401e-18			USP32	0.52088	7.13634e-20	3.1251e-18
CAV2	-0.607471	3.19078e-05	0.00113655			ALDH2	0.520947	5.54e-30	2.77e-28			USP5	0.474057	7.43663e-20	3.85636e-18			EXO1	0.4492	7.33639e-20	3.20582e-18
FOSL1	0.709164	3.30366e-05	0.00117333			TEAD1	-0.403048	5.68e-30	2.84e-28			MEX3A	-0.472876	7.51368e-20	3.88797e-18			SNRNP48	0.6256	8.36776e-20	3.64867e-18
SLC35F5	-0.485369	3.30852e-05	0.00117333			APOL1	0.747229	5.7e-30	2.84e-28			BRD2	0.387452	8.3909e-20	4.33261e-18			AIFM2	0.554337	8.49614e-20	3.69673e-18
ZBED5-AS1	-1.43337	3.33148e-05	0.00117889			CEND1	-0.730635	5.87e-30	2.92e-28			GALNT2	0.418883	9.42087e-20	4.85406e-18			NOMO2	0.705272	8.91851e-20	3.87223e-18
PLA2G16	0.501927	3.33907e-05	0.001179			LMOD1	-0.636047	7.64e-30	3.79e-28			TMUB1	-0.697795	1.03554e-19	5.32423e-18			FAM168A	-0.486643	9.25928e-20	4.01163e-18
LIPC	-0.711813	3.34661e-05	0.0011791			ERBB2	-0.591875	7.67e-30	3.8e-28			CCDC85C	-0.527038	1.10535e-19	5.67107e-18			NEDD9	-0.405221	9.91907e-20	4.28837e-18
ARMC9	-0.491145	3.36181e-05	0.00118188			PSMA3	0.540259	8.17e-30	4.03e-28			RASL10B	-1.15067	1.16027e-19	5.94026e-18			PFDN2	0.480737	1.0341e-19	4.4613e-18
VTI1B	-0.450339	3.43109e-05	0.00120363			NDEL1	0.59539	8.22e-30	4.05e-28			ETV3	0.460882	1.29221e-19	6.60176e-18			EMX2OS	-0.394606	1.04511e-19	4.49928e-18
MYOCOS	2.34398	3.43335e-05	1			AHCYL1	0.374297	8.49e-30	4.17e-28			CRTAP	-0.355654	1.31606e-19	6.7094e-18			BOC	-0.540337	1.06915e-19	4.59304e-18
FNDC10	-0.485662	3.45862e-05	0.00121015			ORAI2	-0.464811	1.04e-29	5.09e-28			GSR	0.437732	1.44808e-19	7.36692e-18			HNRNPAB	0.396641	1.11134e-19	4.76425e-18
RELL2	0.457543	3.46461e-05	0.00121015			PRMT6	-0.645981	1.04e-29	5.09e-28			RSU1	0.427674	1.50219e-19	7.62616e-18			PCDH10	1.43423	1.22462e-19	5.23885e-18
BCAS4	-0.475195	3.61441e-05	0.00125976			PNP	0.626583	1.79e-29	8.76e-28			DDX27	0.393529	1.64038e-19	8.31021e-18			P3H1	0.530979	1.25832e-19	5.37173e-18
ACSF3	-0.667747	3.62604e-05	0.0012611			VSIR	-0.921938	1.85e-29	9.02e-28			RBM11	0.850827	1.72877e-19	8.7397e-18			SMAD6	-0.708849	1.309e-19	5.57641e-18
DKK3	-0.633249	3.66491e-05	0.00127189			EXT2	0.471504	1.93e-29	9.41e-28			SLC41A1	0.412655	1.93117e-19	9.74253e-18			C19orf48	-0.631086	1.52298e-19	6.4744e-18
HMG20A	-0.378127	3.71923e-05	0.00128603			TBC1D9B	-0.427946	1.98e-29	9.6e-28			ARHGAP23	-0.442631	1.99426e-19	1.00399e-17			BTG3	0.599715	1.80608e-19	7.66192e-18
SNPH	-1.81933	3.72153e-05	0.00128603			MED13	0.558441	2.03e-29	9.85e-28			EAF2	1.05843	1.99862e-19	1.00409e-17			NAT14	-0.722359	1.90748e-19	8.07528e-18
KLHDC9	-0.766283	3.76538e-05	0.00129619			MARVELD1	-0.874262	2.04e-29	9.88e-28			WDR74	0.558557	2.23364e-19	1.11983e-17			DOCK1	-0.569051	1.95658e-19	8.26595e-18
DNAJB1	0.312178	3.77195e-05	0.00129619			UPK3B	-0.686257	2.08e-29	1e-27			CALB1	0.544931	2.28555e-19	1.14348e-17			FAM217B	-0.778703	2.01253e-19	8.48469e-18
SLC39A8	0.403499	3.77745e-05	0.00129619			BTG3	0.58199	2.63e-29	1.27e-27			RNF114	0.377435	2.58895e-19	1.2926e-17			AAK1	0.536539	2.2387e-19	9.40057e-18
AC131392.1	2.35897	3.78292e-05	0.00129619			DDX21	0.381017	3.16e-29	1.52e-27			HNRNPAB	0.385609	2.66278e-19	1.32673e-17			ZBTB7B	0.497256	2.239e-19	9.40057e-18
FGFR1	-0.596745	3.8516e-05	0.00131694			BLOC1S2	0.75278	3.28e-29	1.57e-27			TINF2	0.526646	2.68966e-19	1.33736e-17			FLOT2	-0.495132	2.24874e-19	9.42202e-18
HSPA2	0.372852	3.91581e-05	0.00133607			METTL4	0.624489	3.39e-29	1.62e-27			SASH1	-0.441245	2.73804e-19	1.35862e-17			KIF1B	0.431351	2.39842e-19	1.00286e-17
LDLRAP1	-0.504592	3.93712e-05	0.00133816			EYA3	0.460769	3.51e-29	1.68e-27			CELSR1	-0.451	2.7886e-19	1.38087e-17			PRMT6	-0.612383	2.42153e-19	1.01044e-17
ALDH3B1	-0.45797	3.93845e-05	0.00133816			LRRK1	-0.606699	3.56e-29	1.7e-27			TBC1D16	0.368093	2.82588e-19	1.39647e-17			WDR26	0.431906	2.56482e-19	1.06805e-17
SLC9A2	-0.464669	4.10501e-05	0.00139184			CLCF1	0.870756	3.64e-29	1.73e-27			MAOA	0.989665	3.39011e-19	1.67188e-17			MEX3A	-0.517372	2.76919e-19	1.1508e-17
SLC1A5	0.378856	4.19136e-05	0.00141815			SQSTM1	0.461943	4.26e-29	2.02e-27			LRRK1	-0.503334	3.57351e-19	1.75873e-17			HMGA2	-0.754113	3.23996e-19	1.34369e-17
SLCO3A1	-0.418365	4.23269e-05	0.00142915			SYNJ1	0.685322	4.99e-29	2.36e-27			YOD1	0.55258	3.6803e-19	1.80761e-17			SRP68	-0.476412	3.56279e-19	1.47458e-17
ATP6V0A1	0.334704	4.25577e-05	0.00143395			CRIP2	-0.681189	5.22e-29	2.47e-27			TRIM65	-0.53029	4.04086e-19	1.97811e-17			TFPI2	0.939115	3.96902e-19	1.63937e-17
MST1	-0.537169	4.31349e-05	0.00145039			CAPN2	-0.504396	6e-29	2.83e-27			STK25	-0.563371	4.0438e-19	1.97811e-17			GALNT2	0.400049	4.70226e-19	1.9383e-17
SPEF2	-0.856628	4.41987e-05	0.00148159			SARS	0.4341	6.11e-29	2.88e-27			TEX261	-0.552422	4.23437e-19	2.06714e-17			SYNJ1	0.630336	5.09571e-19	2.09624e-17
QPRT	-0.343395	4.42458e-05	0.00148159			RAB5IF	0.712381	6.33e-29	2.98e-27			HAUS1	-0.512451	4.33618e-19	2.11258e-17			DGKG	1.68383	5.14199e-19	2.11101e-17
CGA	0.699452	4.53242e-05	0.00151457			IL15RA	0.945127	7.05e-29	3.31e-27			CCNI	-0.439965	4.56015e-19	2.21722e-17			TGIF1	0.615238	5.25483e-19	2.153e-17
CLIP3	-0.429472	4.58037e-05	0.00152459			PIGU	-0.619141	7.06e-29	3.31e-27			CALCOCO1	-0.58388	5.25612e-19	2.5485e-17			MYDGF	0.499439	5.27074e-19	2.15518e-17
LINC02308	-0.994703	4.58121e-05	0.00152459			SORBS3	-0.761548	7.74e-29	3.62e-27			MTO1	0.431799	5.26258e-19	2.5485e-17			CYFIP2	-0.547738	5.70708e-19	2.32654e-17
TK2	-0.521147	4.61286e-05	0.00153198			SELENOI	0.487136	7.92e-29	3.69e-27			ZNF467	-0.892052	5.57288e-19	2.69337e-17			PSMD11	0.456987	5.71268e-19	2.32654e-17
MAP4K1	0.632252	4.64581e-05	0.00153977			NFKB2	0.375828	8.59e-29	4e-27			CDKN2C	-0.439392	5.61652e-19	2.70905e-17			SEC24D	0.48112	5.76552e-19	2.34338e-17
RINL	-0.66346	4.74e-05	0.00156778			GNS	0.365569	9.34e-29	4.34e-27			MBLAC2	-0.790086	5.7073e-19	2.74735e-17			GPATCH2L	0.539148	6.48194e-19	2.62932e-17
AL161431.1	0.878344	4.89459e-05	0.00161105			ARHGDIA	0.425649	9.44e-29	4.38e-27			CEND1	-0.623229	5.96617e-19	2.86625e-17			SLC26A7	-1.21922	6.65358e-19	2.69358e-17
SOX2	-0.690723	4.89522e-05	0.00161105			HMOX1	1.23656	9.84e-29	4.55e-27			MME	-0.725692	6.03874e-19	2.89536e-17			CLN8	0.634055	6.76876e-19	2.73477e-17
KSR2	0.772427	4.90063e-05	0.00161105			RP2	0.629414	1.1e-28	5.1e-27			NBL1	-0.688915	6.15595e-19	2.94571e-17			PQLC2	0.651153	6.82643e-19	2.7526e-17
C17orf75	-0.782505	4.9602e-05	0.00162733			ASNSD1	0.496858	1.12e-28	5.18e-27			ADAMTS4	1.05098	6.31085e-19	3.01387e-17			SAMD4B	0.401969	7.04531e-19	2.83127e-17
ADAMTS4	0.656682	5.03302e-05	0.00164788			GRPEL2	0.523456	1.15e-28	5.26e-27			GPM6A	1.43129	6.42504e-19	3.06235e-17			ARCN1	0.372373	7.04933e-19	2.83127e-17
CEMIP	0.554887	5.05447e-05	0.00165157			ANKRD27	0.474192	1.2e-28	5.51e-27			CLCF1	0.709669	6.55228e-19	3.11685e-17			ORAI2	-0.440178	7.31135e-19	2.93073e-17
CAVIN1	-0.352393	5.07883e-05	0.00165619			ARL8A	0.56939	1.25e-28	5.74e-27			UBN2	0.52044	6.60268e-19	3.13465e-17			MED8	0.5822	7.93949e-19	3.17626e-17
CCDC40	0.491295	5.2228e-05	0.00169972			HMMR	0.537584	1.35e-28	6.17e-27			LYSMD1	0.475881	6.79649e-19	3.22034e-17			ARNT2	-0.649887	8.28736e-19	3.30893e-17
LGR5	-0.339624	5.3278e-05	0.00173041			ENAH	0.389543	1.52e-28	6.93e-27			KCNK5	0.45407	6.93942e-19	3.28163e-17			NAT8L	-0.621749	8.35246e-19	3.3284e-17
HTRA1	-0.681169	5.38616e-05	0.00174587			AMBP	0.903093	1.58e-28	7.21e-27			TGIF1	0.594504	7.12477e-19	3.36269e-17			PDIA3	0.368099	9.04567e-19	3.5976e-17
ZNF121	0.462488	5.43323e-05	0.00175761			GK	0.801964	1.65e-28	7.5e-27			ALKBH6	0.733116	7.20908e-19	3.39586e-17			EIF1	0.357638	9.83408e-19	3.90354e-17
LINC00284	-1.06301	5.4793e-05	0.00176899			MCM2	-0.473977	1.65e-28	7.5e-27			MINDY1	-0.690033	7.38467e-19	3.4718e-17			ESPL1	-0.53607	1.02572e-18	4.06356e-17
FAM171A2	-0.678704	5.55082e-05	0.00178851			ALDOC	0.416954	1.85e-28	8.38e-27			UBR3	0.477542	7.52898e-19	3.53277e-17			LGMN	0.47941	1.0528e-18	4.16273e-17
MEOX1	-0.548374	5.57905e-05	0.00179404			CCSER2	0.518839	2.05e-28	9.27e-27			SAP130	0.426666	7.55646e-19	3.5388e-17			ASCC1	0.429867	1.06447e-18	4.20075e-17
CBLB	-0.412105	5.6034e-05	0.0017983			RSU1	0.507644	2.62e-28	1.18e-26			CLU	0.48667	7.68721e-19	3.59306e-17			VPS37A	0.608373	1.16531e-18	4.58978e-17
ALDH5A1	-0.369413	5.74856e-05	0.00183914			UFD1	0.503962	3.38e-28	1.52e-26			EZR	0.370716	7.73113e-19	3.60662e-17			GABARAPL1	0.735743	1.18864e-18	4.67265e-17
ZNF90	0.69358	5.75335e-05	0.00183914			ZC3H12A	0.776574	3.41e-28	1.53e-26			PBX1	-0.395499	7.89568e-19	3.67628e-17			SLC26A11	0.513603	1.19106e-18	4.67311e-17
LIMS2	-0.669167	5.82751e-05	0.00185819			AP1M2	-0.486373	3.57e-28	1.6e-26			HOXA-AS2	-0.892344	8.08716e-19	3.7582e-17			LRRFIP2	0.589173	1.21937e-18	4.77501e-17
PLCD3	-0.418021	5.84562e-05	0.00185819			HDGF	-0.400052	3.62e-28	1.62e-26			HMMR	0.45482	8.20727e-19	3.80669e-17			AUP1	-0.57558	1.26495e-18	4.94397e-17
CELSR1	-0.39641	5.85781e-05	0.00185819			EXO1	0.530407	3.77e-28	1.68e-26			DIAPH1	0.356284	8.72086e-19	4.03716e-17			RSU1	0.463036	1.43123e-18	5.58315e-17
KRT19	0.739778	5.8588e-05	0.00185819			CDKN2C	-0.603039	3.96e-28	1.77e-26			GTF3C5	0.572217	9.09799e-19	4.20369e-17			UBR3	0.522199	1.48303e-18	5.77416e-17
LRTOMT	-0.610342	5.98977e-05	0.00189602			MED8	0.578258	3.99e-28	1.78e-26			PSMC5	0.481658	1.07642e-18	4.96405e-17			OLFML2A	-0.958775	1.51429e-18	5.88465e-17
WDFY2	0.685767	6.11019e-05	0.00192555			FAM174A	0.725147	4.08e-28	1.81e-26			COX7A2L	-0.455578	1.14265e-18	5.25943e-17			NDEL1	0.510741	1.59318e-18	6.17941e-17
FAM84B	-0.391163	6.11606e-05	0.00192555			SEC24D	0.553973	4.43e-28	1.96e-26			MFSD11	0.548504	1.26026e-18	5.78976e-17			P4HB	0.387501	1.60438e-18	6.21102e-17
MTMR1	-0.405612	6.11869e-05	0.00192555			PCDH10	1.5635	4.67e-28	2.07e-26			EPS8L2	-0.542941	1.28202e-18	5.87855e-17			ARL8A	0.575877	1.64476e-18	6.35141e-17
ANKFN1	2.46927	6.15837e-05	1			MGAT3	-0.606638	5.03e-28	2.22e-26			DNMT3B	0.641184	1.33251e-18	6.0985e-17			GSDMD	-0.514483	1.64688e-18	6.35141e-17
BANK1	0.998517	6.21427e-05	0.00194887			AKR1C3	1.58867	5.05e-28	2.23e-26			UBE2A	0.390725	1.33701e-18	6.10753e-17			SAA1	1.50888	1.76187e-18	6.78202e-17
PITPNM2	-0.803212	6.21687e-05	0.00194887			HMGA2	-0.6826	5.25e-28	2.31e-26			WIPI1	0.792848	1.51275e-18	6.8973e-17			RAB2B	0.608567	1.8536e-18	7.12166e-17
SPRED2	-0.381399	6.32508e-05	0.00197897			DNAJC3	0.471632	5.48e-28	2.41e-26			EXOC8	0.603186	1.52907e-18	6.95857e-17			CEMIP	0.999897	1.86224e-18	7.1414e-17
CIAO2A	-0.330356	6.41783e-05	0.00200412			ZBTB37	0.539186	6.08e-28	2.66e-26			NAT8L	-0.590419	1.70708e-18	7.75406e-17			NFIL3	0.725783	1.86767e-18	7.14876e-17
STRA6	-0.566261	6.578e-05	0.00205019			GDF15	1.07463	6.09e-28	2.66e-26			PPP1R26	-0.516905	1.74269e-18	7.90094e-17			BCL6	0.984842	1.90694e-18	7.28537e-17
KIAA1211L	-0.523086	6.80845e-05	0.00211794			LRFN1	-0.843619	7.16e-28	3.13e-26			LAMC3	-0.632373	1.75151e-18	7.92606e-17			FZD7	0.80777	2.03244e-18	7.75029e-17
SELENOP	0.41298	6.94694e-05	0.00215688			RC3H2	0.490894	7.32e-28	3.19e-26			CTXN1	-0.7919	1.7625e-18	7.96088e-17			SMARCD3	-0.612294	2.42386e-18	9.22563e-17
MMACHC	-0.427085	7.02265e-05	0.00217621			GRAMD2B	-0.41616	9.61e-28	4.18e-26			MDH1	-0.458145	1.77496e-18	8.00221e-17			ABCA7	0.628951	2.9746e-18	1.13007e-16
PALM	-0.483872	7.21964e-05	0.0022296			DCTN4	0.452573	9.63e-28	4.18e-26			XBP1	0.449086	1.82394e-18	8.20773e-17			BRSK1	0.719542	3.04706e-18	1.15544e-16
VANGL1	-0.347797	7.22242e-05	0.0022296			GALK1	-0.668609	1.01e-27	4.39e-26			TIMP2	-0.425876	1.85466e-18	8.33046e-17			TCEA2	-0.628982	3.11871e-18	1.18041e-16
LINC00857	-0.516307	7.3883e-05	0.00227647			NFE2L1	0.38302	1.06e-27	4.58e-26			SPATA5	0.700517	1.89413e-18	8.49194e-17			FGF18	-0.578137	3.22656e-18	1.21897e-16
CTGF	0.475718	7.51794e-05	0.00231202			SERPINF2	1.98768	1.24e-27	5.34e-26			KDM6B	0.505156	1.93634e-18	8.66512e-17			HSD11B1	4.53214	3.27561e-18	1.23521e-16
GNG7	-1.01001	7.58638e-05	0.00232865			GADD45GIP1	-0.727791	1.43e-27	6.15e-26			ZNF562	0.441744	1.98089e-18	8.84812e-17			TMUB1	-0.656491	3.32126e-18	1.25011e-16
NRG1	-0.835848	7.76772e-05	0.0023798			OSTM1	0.59627	1.47e-27	6.31e-26			2025-03-06	0.381254	2.04138e-18	9.10145e-17			SDF2L1	0.597427	3.34659e-18	1.25732e-16
TLN2	0.625032	7.84038e-05	0.00239753			GSDMD	-0.580966	1.47e-27	6.33e-26			AHCYL1	0.349963	2.37543e-18	1.05713e-16			KIAA0319	0.850004	3.54604e-18	1.3298e-16
SPTLC3	-0.529058	7.91136e-05	0.00241468			SASH1	-0.440718	1.57e-27	6.74e-26			KCNC4	-1.0232	2.41386e-18	1.07226e-16			FAM210B	-0.545106	3.65019e-18	1.36634e-16
RUNDC3A-AS1	-0.840168	8.12143e-05	0.00247413			CEBPB	0.694557	1.76e-27	7.54e-26			TLR6	2.21032	2.53555e-18	1.12425e-16			LYSMD1	0.511175	3.74527e-18	1.39936e-16
AL031727.1	1.11091	8.27682e-05	0.00251674			ABCA7	0.699422	2.08e-27	8.9e-26			KDM5C	0.4015	2.55116e-18	1.12836e-16			CLIC1	0.376386	3.75494e-18	1.4004e-16
ARHGEF40	-0.430584	8.31114e-05	0.00252245			FZD7	0.903327	2.12e-27	9.03e-26			MAP2K1	0.454287	2.55417e-18	1.12836e-16			PSMC1	0.501295	3.88336e-18	1.44565e-16
YRDC	0.320975	8.36281e-05	0.00253338			NRDC	0.39073	2.28e-27	9.71e-26			PRMT6	-0.526805	2.59758e-18	1.14545e-16			PDIA6	0.370884	4.66768e-18	1.73445e-16
CLU	0.360793	8.50388e-05	0.00257131			SLAIN2	0.577351	2.36e-27	1e-25			ZFP36L1	-0.392142	2.73058e-18	1.2019e-16			KLHL15	0.567675	4.7709e-18	1.76958e-16
AKR1C1	1.23195	8.54144e-05	0.00257786			CANX	0.346885	2.66e-27	1.13e-25			CADM2	-0.718285	2.97712e-18	1.30804e-16			BRD2	0.365384	5.16458e-18	1.91212e-16
ID4	0.332735	8.57098e-05	0.00258197			DEDD2	0.573182	2.87e-27	1.21e-25			SYNPO	-0.520009	3.07597e-18	1.34902e-16			AZIN1	0.410608	5.2568e-18	1.94273e-16
KCNMA1	3.09337	8.64004e-05	1			KMT2D	0.454788	2.9e-27	1.22e-25			REEP2	-0.615614	3.09698e-18	1.35577e-16			EMX2	-0.486797	5.29898e-18	1.95477e-16
ZNF143	0.316525	8.76126e-05	0.00263439			CDK5	-0.754158	3.35e-27	1.41e-25			EXO1	0.406976	3.1153e-18	1.36132e-16			INO80	0.548057	5.42443e-18	1.99743e-16
WDFY3	-0.376972	8.82231e-05	0.00264784			GPN3	0.579911	3.55e-27	1.49e-25			ALDH5A1	-0.492581	3.1422e-18	1.3706e-16			PSMB5	0.448103	5.58062e-18	2.05123e-16
CCDC9B	-0.379798	8.87064e-05	0.00265742			MAL	-0.481831	3.58e-27	1.5e-25			EMC4	0.459934	3.21213e-18	1.39858e-16			POU2F1	0.674993	5.76233e-18	2.1142e-16
HSPA1A	0.380299	8.90164e-05	0.00266179			LINC02009	2.73485	4.46e-27	1.87e-25			FAM217B	-0.601661	3.26203e-18	1.41775e-16			CCNI	-0.398321	6.02707e-18	2.20736e-16
PHF8	0.339145	8.94069e-05	0.00266854			AP1G1	0.461498	4.62e-27	1.93e-25			KMT2C	0.430452	3.38512e-18	1.46861e-16			DDA1	0.415541	6.0977e-18	2.22922e-16
LETM2	-0.872425	8.99226e-05	0.00267736			NXF1	0.434515	5.66e-27	2.36e-25			SMIM30	-0.592309	3.59135e-18	1.55529e-16			HSP90AA1	0.360217	6.49937e-18	2.37181e-16
TRIM38	-0.328233	9.00328e-05	0.00267736			SLC2A4RG	-0.548654	5.73e-27	2.39e-25			DOCK1	-0.473117	3.79971e-18	1.64258e-16			EYA3	0.39797	6.76753e-18	2.46525e-16
BMPR1B-DT	0.42273	9.19969e-05	0.00273076			TMED9	0.367357	5.91e-27	2.46e-25			CWC25	0.501366	3.93773e-18	1.6992e-16			CTSA	0.447292	6.88556e-18	2.50376e-16
BTNL9	0.366583	9.26165e-05	0.00274412			ABHD2	0.56074	6.07e-27	2.52e-25			LRRC41	0.378136	4.3779e-18	1.88577e-16			CSRP1	-0.5343	6.95943e-18	2.52611e-16
LYAR	0.374032	9.31878e-05	0.00275601			MEOX1	-1.27702	6.2e-27	2.57e-25			GOLGA7	0.474046	4.41157e-18	1.8969e-16			REEP2	-0.598403	7.70412e-18	2.79144e-16
IFRD1	0.308319	9.35998e-05	0.00276316			PIP4P1	0.623999	6.33e-27	2.62e-25			KIAA0319	0.785188	4.47933e-18	1.92261e-16			ATP6V1D	0.483263	8.3778e-18	3.03014e-16
ARNT2	-0.398541	9.39443e-05	0.00276643			SRP68	-0.50884	6.47e-27	2.67e-25			ARCN1	0.338919	4.56845e-18	1.95739e-16			H6PD	-0.569941	9.01693e-18	3.25553e-16
HSPA5	0.270214	9.40522e-05	0.00276643			USP32	0.545678	6.91e-27	2.85e-25			CYFIP2	-0.524125	4.68666e-18	2.00448e-16			PSMD2	0.421103	9.16812e-18	3.30111e-16
SLC6A9	0.587163	9.48351e-05	0.00278092			EPB41L1	-0.563551	7.17e-27	2.95e-25			ZNF395	-0.589624	4.7921e-18	2.04595e-16			CASC10	-0.68215	9.1756e-18	3.30111e-16
TRIM29	-0.460528	9.4888e-05	0.00278092			ABHD17B	0.706515	7.76e-27	3.19e-25			CCDC93	0.411857	4.81905e-18	2.05384e-16			HMG20A	-0.622655	1.06235e-17	3.81529e-16
MSLNL	-0.478845	9.74157e-05	0.00284985			JMY	0.641266	7.91e-27	3.25e-25			SLC36A1	0.569311	5.21502e-18	2.21868e-16			ADAMTS14	1.73652	1.08967e-17	3.9065e-16
UACA	-0.396946	0.000101159	0.00295403			P3H1	0.529502	8.06e-27	3.3e-25			UNC119B	-0.469293	5.47927e-18	2.32701e-16			ATP1A1	0.334796	1.11685e-17	3.99692e-16
NATD1	-0.501205	0.000101573	0.00296078			ATP5MF	-0.648573	8.45e-27	3.45e-25			CEP55	0.402009	5.6414e-18	2.39166e-16			CHMP5	0.373281	1.1531e-17	4.11939e-16
SEMA5A	-0.322699	0.00010199	0.00296365			ASPSCR1	0.510624	8.45e-27	3.45e-25			CCDC34	-0.691154	5.67768e-18	2.40282e-16			UBQLN4	-0.436152	1.1598e-17	4.13607e-16
FOXO3	-0.3439	0.000102083	0.00296365			ENO2	0.569541	8.7e-27	3.55e-25			EFNB2	-0.462326	5.85008e-18	2.47145e-16			IMPAD1	0.486201	1.18099e-17	4.20429e-16
PAM	-0.278138	0.00010222	0.00296365			FAXDC2	-0.666492	9.32e-27	3.79e-25			ZDHHC2	-0.583369	6.24542e-18	2.63386e-16			ID4	-0.627168	1.20135e-17	4.2693e-16
SDC3	-0.368589	0.000103093	0.00298362			SELENOT	0.553402	9.58e-27	3.89e-25			ZCCHC2	0.661967	6.57139e-18	2.76651e-16			FBXO21	0.474548	1.22492e-17	4.34549e-16
DEFB132	4.93803	0.000103312	1			DDA1	0.423775	1.06e-26	4.3e-25			ALDH2	0.470579	6.75802e-18	2.84013e-16			AQP5	-0.457933	1.23065e-17	4.35822e-16
FAM84A	-0.845472	0.000103568	0.00299204			LYSMD3	0.482592	1.08e-26	4.38e-25			NHSL1	-0.642058	7.22954e-18	3.03302e-16			NIP7	0.452628	1.26058e-17	4.45644e-16
SLC22A31	0.642313	0.000104946	0.00302645			KDM6B	0.533038	1.12e-26	4.52e-25			SPOCK2	0.846501	8.15494e-18	3.41532e-16			SH3PXD2A	-0.476137	1.26589e-17	4.46749e-16
PIP4K2C	0.289252	0.000105431	0.00303502			DYNC1LI1	0.489115	1.35e-26	5.46e-25			NME4	-0.737988	8.68818e-18	3.63235e-16			TIMP2	-0.479807	1.52391e-17	5.36877e-16
AGT	2.85836	0.000105508	1			ATG5	0.504877	1.55e-26	6.26e-25			DNAJC6	0.511916	9.92056e-18	4.14042e-16			NREP	-0.683955	1.53882e-17	5.41191e-16
RASL10B	-0.590769	0.000105741	0.00303604			DIAPH1	0.368522	1.64e-26	6.59e-25			BCAT1	-0.47726	1.02065e-17	4.25242e-16			CLTB	0.412011	1.55864e-17	5.47218e-16
MCAM	-0.558395	0.000105841	0.00303604			NOCT	1.08703	2.02e-26	8.12e-25			JUNB	0.476105	1.02726e-17	4.27259e-16			DNMT1	0.361343	1.67078e-17	5.85577e-16
CGN	-0.364407	0.000106085	0.00303767			AC093323.1	0.470747	2.08e-26	8.32e-25			REC8	-0.498767	1.12879e-17	4.68681e-16			IQGAP2	-0.512771	1.8024e-17	6.30624e-16
JAG1	0.359134	0.000106461	0.00304307			B4GALT2	-0.499759	2.11e-26	8.43e-25			SRD5A3	-0.981672	1.19173e-17	4.93966e-16			GSTO2	-0.565125	1.88033e-17	6.56762e-16
SLC2A1	0.338032	0.000107504	0.00306581			PTS	0.630934	2.44e-26	9.74e-25			LDLRAP1	-0.751239	1.26438e-17	5.2318e-16			STK25	-0.622285	2.0292e-17	7.07544e-16
SLC2A10	-0.696982	0.000107799	0.00306581			PCMT1	0.470131	2.44e-26	9.74e-25			PHEX	0.78939	1.28273e-17	5.29867e-16			SARS	0.373571	2.04856e-17	7.13073e-16
FNBP1	-0.297662	0.000107824	0.00306581			HSPA6	1.14903	2.55e-26	1.02e-24			WDFY2	1.02999	1.29397e-17	5.33597e-16			PIM3	0.477458	2.11438e-17	7.34727e-16
PORCN	0.429644	0.000109772	0.00311573			TTC17	0.404575	2.67e-26	1.06e-24			ATP5MF	-0.610734	1.343e-17	5.5287e-16			ZBTB40	-0.451699	2.14985e-17	7.45782e-16
EMC7	0.31944	0.00011017	0.00312156			ANLN	0.434029	2.72e-26	1.08e-24			KLHL21	0.411576	1.41821e-17	5.8284e-16			USP38	0.643981	2.1577e-17	7.47232e-16
SLC16A2	-0.465608	0.000110698	0.00312965			ABCF3	0.410251	2.79e-26	1.1e-24			RAB11FIP4	-0.357789	1.44668e-17	5.93533e-16			CDC123	0.358212	2.17547e-17	7.52108e-16
BLVRB	0.534708	0.000110842	0.00312965			CYFIP2	-0.541732	2.82e-26	1.11e-24			SMIM13	-0.605813	1.46956e-17	6.01896e-16			NR1H3	-0.734858	2.18631e-17	7.54574e-16
WDR11	-0.37607	0.000111449	0.00314132			PHEX	1.00767	2.82e-26	1.11e-24			MCU	-0.359309	1.50269e-17	6.14425e-16			TAP1	0.434341	2.43933e-17	8.40474e-16
MVB12B	-0.535264	0.000112822	0.00317449			KEAP1	0.372643	2.88e-26	1.13e-24			SUCLG1	-0.48503	1.5278e-17	6.23637e-16			ST6GALNAC1	0.883006	2.52437e-17	8.68306e-16
CYLD	-0.489279	0.00011587	0.00325172			FNDC3B	0.515722	2.89e-26	1.14e-24			ARL8A	0.513914	1.56336e-17	6.37074e-16			RAB21	0.54364	2.66996e-17	9.16836e-16
AC139769.2	1.65716	0.000116011	0.00325172			SLC39A13	-0.490025	2.93e-26	1.15e-24			EMC3	0.484591	1.57176e-17	6.39422e-16			SLC6A6	0.665522	2.80674e-17	9.62181e-16
AC008554.1	2.09607	0.000116169	0.00325172			VCPIP1	0.693014	3.03e-26	1.19e-24			ZNRF1	-0.491381	1.86656e-17	7.58075e-16			FICD	1.01296	2.85517e-17	9.77139e-16
TMEM120A	0.382129	0.000116642	0.00325935			VPS51	-0.549757	3.11e-26	1.22e-24			DCAF12L2	0.808475	1.91939e-17	7.78223e-16			TNFRSF21	0.602262	2.87939e-17	9.83777e-16
PGPEP1	0.289021	0.000118914	0.0033171			CCDC93	0.452105	3.12e-26	1.22e-24			MOCS2	0.358346	2.07481e-17	8.39827e-16			ACBD3	0.478731	2.89648e-17	9.87956e-16
AMY1B	3.54141	0.000119374	1			SEL1L	0.468268	3.54e-26	1.38e-24			ADAM9	0.458076	2.34627e-17	9.4812e-16			TUBA1C	0.394908	2.92261e-17	9.95203e-16
EVA1B	-0.598156	0.000119428	0.00332573			C1orf52	0.652346	4.67e-26	1.82e-24			TOM1	0.674784	2.38515e-17	9.62222e-16			UBN2	0.511531	2.9361e-17	9.98127e-16
MINDY1	-0.461877	0.000119919	0.00333367			COG5	0.481668	5.46e-26	2.12e-24			SECISBP2	0.396473	2.43559e-17	9.80933e-16			DDX27	0.380518	3.02831e-17	1.02776e-15
PSMB3	0.333043	0.000120573	0.00334611			LRP8	0.503604	6.15e-26	2.38e-24			RAB2B	0.549702	2.74247e-17	1.10269e-15			UBE2A	0.471111	3.06936e-17	1.03996e-15
RGS2	0.472343	0.00012152	0.00336099			SEMA6C	-0.926912	6.36e-26	2.46e-24			GTF2B	0.579878	2.97165e-17	1.19286e-15			ZFR	0.38307	3.13289e-17	1.05972e-15
KITLG	-0.881347	0.000121524	0.00336099			GAS2L1	-0.745519	6.47e-26	2.5e-24			ANK3	0.515587	3.47784e-17	1.39373e-15			TBK1	0.514766	3.1704e-17	1.07063e-15
ID2	-0.573111	0.000123551	0.00340867			SAMD4B	0.371651	6.85e-26	2.64e-24			EI24	-0.554497	3.55885e-17	1.42264e-15			SLC29A3	-0.8544	3.19344e-17	1.07662e-15
NBL1	-0.468541	0.000123669	0.00340867			CUEDC2	-0.592978	8.31e-26	3.2e-24			CPNE3	-0.442289	3.56175e-17	1.42264e-15			ATP6AP1	0.411183	3.23047e-17	1.08731e-15
CBR1	0.309676	0.000124795	0.00343389			TALDO1	0.528949	8.52e-26	3.28e-24			ADRA2C	-0.967756	3.68126e-17	1.46795e-15			SNHG4	-0.430782	3.59955e-17	1.20953e-15
ZBTB37	0.390874	0.000126492	0.00347468			SURF4	0.336524	9.11e-26	3.5e-24			UFD1	0.43528	3.78661e-17	1.50747e-15			GRIK2	-1.22097	3.61538e-17	1.21285e-15
SRGN	0.583253	0.000127474	0.00349571			PLEKHA4	-0.556255	9.43e-26	3.62e-24			SLC29A3	-0.756351	3.8947e-17	1.54795e-15			AHNAK	-0.367451	4.1723e-17	1.39738e-15
ZNF618	-0.341866	0.000131204	0.00359192			PFDN2	0.472352	1.04e-25	3.97e-24			VPS37A	0.493682	3.93888e-17	1.56294e-15			POP4	0.427771	4.28488e-17	1.43273e-15
RAB42	-0.807801	0.000132313	0.00361619			TAX1BP1	0.453925	1.36e-25	5.18e-24			MPHOSPH10	0.519342	4.12242e-17	1.63309e-15			ACADVL	-0.411261	4.33233e-17	1.44622e-15
SLC35B4	-0.38352	0.000134743	0.0036764			PDIA4	0.415139	1.56e-25	5.94e-24			FARP1	-0.36923	4.4526e-17	1.761e-15			OGT	-0.345111	4.40956e-17	1.46959e-15
SOSTDC1	1.69269	0.000135285	0.00368497			SLC35B4	-0.606436	1.59e-25	6.05e-24			POU2F1	0.693995	4.59035e-17	1.81251e-15			FLG	-0.582352	4.42346e-17	1.47181e-15
SGCG	-1.34237	0.000136756	0.00371667			SKA1	0.532906	1.95e-25	7.41e-24			GREB1	1.44135	4.85213e-17	1.91275e-15			ZNF618	-0.449565	4.6145e-17	1.53287e-15
RELT	0.443863	0.000136907	0.00371667			NSUN3	0.90238	1.95e-25	7.41e-24			AKR1B1	0.413384	4.99508e-17	1.9659e-15			KCNC4	-1.20277	4.6963e-17	1.55751e-15
CXCL12	-1.23601	0.00013777	0.00373385			AHDC1	-0.48587	2.12e-25	8.03e-24			UGGT1	0.420951	5.15995e-17	2.02748e-15			PPP1R26	-0.58461	4.94024e-17	1.63574e-15
PDCL2	-0.878175	0.00013844	0.00374574			ZFR	0.436394	2.15e-25	8.12e-24			ZSWIM4	0.556137	5.44727e-17	2.13691e-15			CD52	2.81717	5.15094e-17	1.70274e-15
MTHFD2	0.337806	0.000139039	0.00375567			DLG5	-0.443056	2.23e-25	8.41e-24			NFKB2	0.410624	5.64866e-17	2.21232e-15			FAXDC2	-0.707126	5.18344e-17	1.7107e-15
COL14A1	2.28164	0.000139143	1			UBE2M	0.42485	2.28e-25	8.59e-24			SLC35F5	-0.500226	5.82098e-17	2.27611e-15			UBE2M	0.533315	5.44544e-17	1.79427e-15
SORBS3	-0.478109	0.000141435	0.00380772			STIL	0.476386	2.39e-25	8.99e-24			NR2F1-AS1	-1.15091	6.2428e-17	2.43711e-15			EMC3	0.486855	5.93853e-17	1.95358e-15
AAR2	-0.362726	0.000141436	0.00380772			TIMM8B	0.489445	2.46e-25	9.26e-24			SHISAL1	-1.64024	6.39137e-17	2.49109e-15			PSMD8	0.472249	5.95057e-17	1.95438e-15
GTF2IRD2B	-0.467932	0.000142477	0.0038294			NCAPG2	0.484769	2.73e-25	1.02e-23			CNKSR3	0.609387	6.42995e-17	2.50209e-15			MFSD11	0.543605	6.00712e-17	1.96977e-15
AP1M2	-0.351459	0.000143123	0.00383866			SUCLG1	-0.569892	2.98e-25	1.12e-23			SPR	-0.588946	6.4792e-17	2.5172e-15			WIPI1	0.83393	6.32788e-17	2.07162e-15
KIF1BP	-0.410646	0.00014331	0.00383866			ETV3	0.521437	3.22e-25	1.2e-23			SH3PXD2A	-0.418693	6.90511e-17	2.67836e-15			NME4	-0.798217	6.54814e-17	2.14029e-15
SH3D19	-0.446504	0.000143532	0.00383866			STK25	-0.665416	3.44e-25	1.29e-23			STK40	0.419925	7.10198e-17	2.75031e-15			TRIB3	0.594335	6.56654e-17	2.14286e-15
RAB3A	0.529966	0.000145099	0.00387416			LYSMD1	0.533009	3.74e-25	1.39e-23			SOX12	-0.484428	7.29356e-17	2.81998e-15			TBP	0.572396	6.64333e-17	2.16445e-15
ZNF32	-0.411999	0.000145987	0.00388938			EIF5A2	0.671037	3.82e-25	1.42e-23			UQCRH	0.828756	7.63235e-17	2.94626e-15			CYB5R4	0.658364	6.66063e-17	2.16662e-15
STON2	-0.375545	0.000146149	0.00388938			CTXN1	-0.871881	4.02e-25	1.5e-23			INO80	0.498538	7.67271e-17	2.95385e-15			RAB5A	0.536381	6.72612e-17	2.18443e-15
CTXN1	-0.57135	0.000146671	0.00389598			HGSNAT	-0.709568	4.18e-25	1.55e-23			SLC25A25	0.626224	7.67647e-17	2.95385e-15			SAMD9L	1.30639	7.27295e-17	2.35827e-15
SLC35E2B	-0.340194	0.000146878	0.00389598			POU2F1	0.701264	4.26e-25	1.58e-23			EPPIN	3.95172	7.84758e-17	3.01489e-15			FAM174A	0.637932	7.2921e-17	2.36072e-15
HRH1	0.865553	0.000148506	0.00393274			TEX261	-0.694005	4.4e-25	1.63e-23			ARNT2	-0.539799	8.44395e-17	3.23886e-15			TOX	-0.527234	7.73118e-17	2.49889e-15
FSTL1	-0.422023	0.000149201	0.0039447			EMC4	0.478442	4.6e-25	1.7e-23			NCSTN	0.419792	8.53146e-17	3.26724e-15			BCAN	0.946151	7.90309e-17	2.55041e-15
USF3	0.410879	0.000149859	0.00395384			B2M	0.388254	4.72e-25	1.74e-23			TMEM38A	-0.462691	8.93549e-17	3.41655e-15			RSAD2	1.19099	8.27444e-17	2.66602e-15
SYT8	-2.38157	0.000150022	1			GPM6A	1.6812	4.84e-25	1.78e-23			PSMD11	0.381482	9.27755e-17	3.54174e-15			ING1	0.429821	8.34375e-17	2.6841e-15
FNBP1L	-0.401149	0.000150248	0.00395384			PCBD1	-0.407518	4.85e-25	1.78e-23			C2CD2L	0.480087	9.29547e-17	3.54298e-15			NPR3	1.16294	8.89513e-17	2.85696e-15
DOCK1	-0.327076	0.000150279	0.00395384			CLIP3	-0.49464	5.08e-25	1.87e-23			ZC3H12A	0.677347	9.61184e-17	3.6578e-15			FBRS	0.448367	8.99769e-17	2.88535e-15
SH2B1	-0.379851	0.000150672	0.00395776			FADS2	-0.672704	5.18e-25	1.9e-23			NRDC	0.347112	9.73228e-17	3.69781e-15			NFE2L1	0.358257	1.01575e-16	3.25217e-15
PTPRQ	-0.650899	0.000151025	0.00396062			SPOCK2	1.05684	5.64e-25	2.06e-23			MAPK8IP1	-0.437481	9.9173e-17	3.76219e-15			SERPINH1	0.367576	1.02609e-16	3.28011e-15
TNFRSF21	0.357586	0.000151702	0.00397193			RAB6A	0.473765	5.75e-25	2.1e-23			TAF2	0.404831	1.145e-16	4.33313e-15			MLXIPL	-0.96676	1.03447e-16	3.30171e-15
AC093323.1	0.314136	0.000153835	0.0040213			B3GAT3	0.451036	6e-25	2.19e-23			SLC29A1	-0.491111	1.14717e-16	4.33313e-15			RBP1	-0.531369	1.04926e-16	3.34369e-15
CX3CL1	-0.602217	0.000155701	0.00406353			TBP	0.649834	6.15e-25	2.24e-23			TBP	0.54802	1.14761e-16	4.33313e-15			ATP1B3	0.406969	1.09033e-16	3.46913e-15
VPS50	-0.398328	0.000158063	0.00411483			TMEM120A	0.453742	6.55e-25	2.38e-23			CAVIN1	-0.354607	1.25265e-16	4.72235e-15			PCK1	-0.518246	1.13286e-16	3.59535e-15
IDNK	-0.919123	0.000158175	0.00411483			DNAJC6	0.596279	7.16e-25	2.6e-23			FICD	0.886898	1.26344e-16	4.75562e-15			PABPC4	-0.423633	1.13353e-16	3.59535e-15
C1S	0.31226	0.000159349	0.00413873			DLGAP3	-0.573996	7.16e-25	2.6e-23			LARP4	0.488586	1.28225e-16	4.81889e-15			MFSD1	0.492859	1.26569e-16	4.00828e-15
TMEFF2	-1.11096	0.000161387	0.00418497			PDIA6	0.373997	7.29e-25	2.64e-23			TFEB	-0.745028	1.33145e-16	4.99603e-15			DNMT3B	0.636077	1.31868e-16	4.16962e-15
PRDX1	0.278829	0.000166399	0.00430804			HMG20A	-0.654349	8.13e-25	2.94e-23			GYG2	-1.11697	1.36998e-16	5.13263e-15			SLC30A7	0.500663	1.33295e-16	4.2082e-15
CTF1	-0.766337	0.000166894	0.00431395			FOXP4	-0.561229	8.73e-25	3.15e-23			WWP1	0.442653	1.43282e-16	5.35978e-15			ANP32E	0.597468	1.35046e-16	4.25688e-15
MYO15B	-0.456527	0.000170147	0.00438509			RGS10	-0.502041	8.8e-25	3.17e-23			TTC17	0.328922	1.48877e-16	5.56046e-15			XAB2	0.499322	1.40038e-16	4.4074e-15
GTF2IP4	-0.471914	0.000170187	0.00438509			PPM1K	0.666981	9.4e-25	3.38e-23			DUSP1	0.630283	1.49517e-16	5.57575e-15			TTC17	0.344138	1.4091e-16	4.428e-15
PPP2R5B	-0.443091	0.000172738	0.00444375			ARCN1	0.347915	9.78e-25	3.51e-23			ITGB4	-0.603554	1.50443e-16	5.60161e-15			MVP	-0.511111	1.46914e-16	4.60957e-15
TMEM98	-0.862373	0.000174185	0.00446974			HK2	0.384538	9.95e-25	3.57e-23			PRRC2C	0.381238	1.61738e-16	6.01292e-15			RAB26	-0.844528	1.51883e-16	4.75814e-15
PCDHB6	0.456862	0.000174307	0.00446974			DERL1	0.397311	1.02e-24	3.64e-23			SLC8A1	-0.408583	1.67168e-16	6.20525e-15			GREB1	1.63228	1.56002e-16	4.87969e-15
RAB11FIP4	-0.295317	0.000174575	0.00446974			CEP85	0.434848	1.1e-24	3.93e-23			AFF4	0.464872	1.67459e-16	6.20652e-15			EI24	-0.649359	1.61047e-16	5.02975e-15
COL6A2	-0.65338	0.000175786	0.00449364			HSF2	0.623054	1.12e-24	4e-23			MAN2B2	0.379468	1.80498e-16	6.67953e-15			SAP130	0.47302	1.63612e-16	5.10205e-15
HSPA1B	0.364964	0.000176566	0.00450072			PHC3	0.549248	1.31e-24	4.68e-23			PLEKHM3	0.864729	1.88113e-16	6.95069e-15			TMEM161A	0.402978	1.67324e-16	5.20982e-15
TMEM51	-0.785973	0.000176618	0.00450072			STK4	0.390728	1.33e-24	4.72e-23			ADGRL1	-0.439906	1.88852e-16	6.96736e-15			SOCS7	0.385302	1.70029e-16	5.28596e-15
ANXA3	-0.295446	0.00017694	0.00450182			FARP1	-0.387202	1.34e-24	4.75e-23			BYSL	0.455816	1.89207e-16	6.9698e-15			SLC10A3	0.468687	1.70769e-16	5.30088e-15
DIRC3	-0.873412	0.000177262	0.00450296			RNPEPL1	-0.729805	1.46e-24	5.19e-23			ATG16L1	0.518636	1.91827e-16	7.05555e-15			AP1G1	0.40738	1.95632e-16	6.06341e-15
DNAJC18	-0.433744	0.000179742	0.00455881			ALKBH5	0.533979	1.55e-24	5.49e-23			PSAT1	0.389606	1.92282e-16	7.06155e-15			GTF2B	0.649581	2.22198e-16	6.87631e-15
GPRASP2	-0.600155	0.000180779	0.00457793			SOCS7	0.363418	1.64e-24	5.8e-23			PPP2R2C	-0.86853	2.06659e-16	7.57801e-15			CLCF1	0.711007	2.23243e-16	6.89816e-15
TTC12	-0.439542	0.000181741	0.00459512			TM2D3	0.593093	1.64e-24	5.8e-23			RAE1	0.378415	2.12548e-16	7.78214e-15			TMEM132A	-0.46183	2.27353e-16	7.01453e-15
MMRN2	-0.444077	0.000182377	0.00460404			RTL5	-1.06491	1.67e-24	5.89e-23			NUCKS1	-0.485501	2.14544e-16	7.84337e-15			KLHDC3	-0.443758	2.66771e-16	8.21825e-15
ZNF165	0.402565	0.000185219	0.00466849			SLC6A6	0.688232	1.83e-24	6.43e-23			CRIM1	0.399247	2.16347e-16	7.89731e-15			LRP8	0.440923	2.69006e-16	8.27456e-15
SERTM1	1.51222	0.000185953	0.00467973			SLC36A4	0.467751	1.86e-24	6.55e-23			ATP6V1D	0.417525	2.33986e-16	8.5283e-15			ELFN2	-1.39842	2.80614e-16	8.61863e-15
RETREG1	-0.484053	0.000187144	0.0047024			OBSCN	-0.624788	1.98e-24	6.93e-23			ACTB	0.334471	2.46601e-16	8.97457e-15			SLC29A2	-0.553873	3.05596e-16	9.37176e-15
CCDC80	0.384073	0.000189639	0.00475771			SLC2A12	-0.588753	2e-24	7.03e-23			PITRM1	0.423084	2.6278e-16	9.549e-15			ZCCHC2	0.672623	3.06886e-16	9.39718e-15
NUCKS1	-0.390712	0.000190833	0.00478026			MPI	-0.712785	2.02e-24	7.06e-23			OSER1-DT	0.707143	2.65362e-16	9.62834e-15			TOM1	0.709404	3.07907e-16	9.41428e-15
EPYC	-2.38039	0.000192544	1			DOCK1	-0.574557	2.12e-24	7.42e-23			CTSH	-0.688221	2.72026e-16	9.85534e-15			AP3B2	0.529602	3.15049e-16	9.6182e-15
ESPL1	-0.323212	0.000194591	0.00486688			SPATA13	0.758512	2.17e-24	7.57e-23			MSLNL	-0.686993	2.73001e-16	9.87584e-15			AC022149.1	0.585609	3.16393e-16	9.64477e-15
ARHGAP29	-0.371561	0.000196834	0.00491539			FABP3	-0.514259	2.27e-24	7.91e-23			CFL2	-0.431337	2.76733e-16	9.9837e-15			ADGRL1	-0.477209	3.29903e-16	1.00416e-14
GTF2IRD1	-0.343897	0.000197499	0.0049244			JUNB	0.551505	2.5e-24	8.7e-23			PGM1	-0.42733	2.76809e-16	9.9837e-15			MRPS26	-0.619254	3.37319e-16	1.0252e-14
SPATA13	0.420486	0.000201721	0.00502196			REEP2	-0.667684	2.54e-24	8.83e-23			PM20D2	-0.621237	2.90405e-16	1.04585e-14			RC3H2	0.445429	3.41351e-16	1.0359e-14
KCNB1	1.69812	0.00020395	0.00506965			CTSA	0.391487	2.7e-24	9.36e-23			PSMC1	0.467286	2.96636e-16	1.0667e-14			CLTC	0.376953	3.49301e-16	1.05845e-14
AC004264.1	-2.37878	0.000205023	1			CUX1	-0.510225	2.84e-24	9.83e-23			PIGU	-0.490339	3.42443e-16	1.22959e-14			PHEX	0.921547	3.51679e-16	1.06408e-14
AL031985.3	0.455263	0.000208318	0.0051703			LRFN3	-0.726928	2.84e-24	9.83e-23			MAP1B	1.29712	3.53492e-16	1.26738e-14			SDF4	0.39621	3.58454e-16	1.08297e-14
PRMT6	-0.342586	0.000208972	0.00517861			MSRB3	-0.729433	2.91e-24	1e-22			ATP6V0B	0.453548	3.58085e-16	1.28194e-14			FARP1	-0.35936	4.18035e-16	1.2611e-14
MRPL58	-0.536286	0.000210382	0.00520558			NCK2	-1.03676	2.96e-24	1.02e-22			AP3B2	0.503834	3.66344e-16	1.30957e-14			ERLEC1	0.505219	4.25179e-16	1.28076e-14
H1F0	-0.381291	0.000211348	0.00522153			CRIM1	0.428848	3.14e-24	1.08e-22			ALKBH5	0.467066	3.81442e-16	1.36153e-14			TMEM41B	0.615155	4.41512e-16	1.32799e-14
ZNF605	-0.498295	0.000213235	0.00526013			CCL28	-0.592059	3.22e-24	1.11e-22			RSAD2	1.05484	3.93298e-16	1.40178e-14			HELLS	0.562668	4.51729e-16	1.35672e-14
TMEM108	0.780499	0.000215001	0.00529562			SLC29A3	-0.875419	3.23e-24	1.11e-22			SELENON	-0.550423	4.08688e-16	1.45448e-14			OBSCN	-0.527493	4.79294e-16	1.43739e-14
FKRP	-0.576642	0.000215666	0.00530395			SLC36A1	0.656688	3.29e-24	1.13e-22			BPNT1	0.350766	4.38325e-16	1.55766e-14			BTAF1	0.376567	4.8168e-16	1.44242e-14
CCDC151	-0.623874	0.00021715	0.00533234			ZNRF1	-0.552883	3.61e-24	1.23e-22			TBC1D2B	-0.571608	4.45695e-16	1.58153e-14			IQCE	-0.680728	4.89718e-16	1.46434e-14
ORAI2	-0.358042	0.000218091	0.00534735			TOM1	0.734986	4.1e-24	1.4e-22			ARHGDIA	0.463801	4.66973e-16	1.65441e-14			NDUFA4	-0.42363	4.91365e-16	1.46711e-14
SSH3	-0.487895	0.000218696	0.0053503			PLXNB1	-0.413085	4.11e-24	1.4e-22			ST3GAL6	0.621641	4.67603e-16	1.65441e-14			SECISBP2	0.404007	5.13917e-16	1.53219e-14
CFB	-0.48381	0.000218871	0.0053503			GPR107	0.357766	4.18e-24	1.43e-22			NCK2	-0.798301	4.85451e-16	1.71505e-14			OAZ1	0.367453	5.22714e-16	1.55614e-14
CLCN4	-0.524924	0.000219535	0.00535845			FAM91A1	0.368364	5.17e-24	1.76e-22			PIR	0.576879	4.89778e-16	1.72781e-14			AC007996.1	-0.73408	5.39514e-16	1.60381e-14
TP53I3	-0.56192	0.000220768	0.00538042			INO80	0.529016	5.24e-24	1.78e-22			CSDC2	-0.948896	5.31257e-16	1.8714e-14			MVB12A	0.386246	5.42963e-16	1.61171e-14
SLC44A4	0.855292	0.000223164	0.00543065			MPHOSPH10	0.652107	5.52e-24	1.87e-22			MYDGF	0.468964	5.38674e-16	1.89477e-14			ENAH	0.365554	5.9168e-16	1.75377e-14
OSBPL7	-0.687423	0.000224816	0.00546265			FBXO30	0.751707	5.62e-24	1.9e-22			KLF6	0.473978	5.88654e-16	2.06756e-14			SNX17	-0.401621	6.00332e-16	1.77682e-14
SERPINB8	0.372571	0.000225421	0.00546916			WIPI1	0.83778	6.24e-24	2.11e-22			TSPAN14	0.337456	6.06167e-16	2.12598e-14			LARS2	-0.620247	6.04597e-16	1.78685e-14
IFIT2	-0.550965	0.000226917	0.00549232			GNG12	-0.473697	6.5e-24	2.19e-22			CCDC136	-0.628657	6.35716e-16	2.22639e-14			FTSJ3	0.352376	6.11367e-16	1.80424e-14
ZNF362	-0.533886	0.000227054	0.00549232			LAMB2	-0.388921	6.68e-24	2.25e-22			SLC7A5	0.4622	6.66166e-16	2.32965e-14			SLC29A1	-0.535894	6.17123e-16	1.81859e-14
P4HA2	0.340889	0.000228433	0.00551747			ZNF777	-0.710928	7.27e-24	2.45e-22			GPN3	0.444152	6.77539e-16	2.366e-14			TEX261	-0.582608	6.4125e-16	1.88696e-14
PARVA	-0.286544	0.000229153	0.0055266			TIPARP	0.698874	7.57e-24	2.55e-22			BCAS2	0.379626	6.79842e-16	2.37062e-14			HDGF	-0.319675	6.44591e-16	1.89406e-14
AC087741.1	-0.431805	0.000234576	0.005649			DDX5	0.368578	7.86e-24	2.64e-22			GPR75	0.870956	6.87776e-16	2.39378e-14			TCP1	0.313563	6.67209e-16	1.95769e-14
AGK	-0.331155	0.000236148	0.00567842			TRIM65	-0.614126	8.16e-24	2.74e-22			FASTKD1	-0.636308	6.88464e-16	2.39378e-14			HCFC1	0.445121	6.71243e-16	1.96669e-14
NQO2	0.341388	0.000237483	0.00570206			TMEM132A	-0.492162	9.81e-24	3.29e-22			POC5	0.602492	7.2062e-16	2.50198e-14			CEND1	-0.527413	6.99899e-16	2.04771e-14
PLA2G4A	0.948413	0.000243603	0.00584036			RBM38	-0.636836	9.84e-24	3.29e-22			HCFC1	0.380037	7.28733e-16	2.52652e-14			PRELID1	0.371048	7.31737e-16	2.13778e-14
ALDH7A1	-0.263931	0.000244589	0.00585533			ZFP36	0.600804	1e-23	3.34e-22			SLC35B4	-0.48896	7.35024e-16	2.54468e-14			EXOC8	0.638526	7.35033e-16	2.14434e-14
IDH1	0.305545	0.000247708	0.00592123			MFSD3	-0.521737	1e-23	3.34e-22			CIAO2A	-0.454264	7.37655e-16	2.55013e-14			SASH1	-0.40232	7.40968e-16	2.15856e-14
GPN3	0.344294	0.000249784	0.00596208			TRIB3	0.640277	1.03e-23	3.44e-22			TNFSF10	-0.875279	7.43313e-16	2.56602e-14			UFD1	0.461107	7.58667e-16	2.20696e-14
TFEB	-0.604352	0.000252084	0.00600813			EIF2S3	-0.331625	1.19e-23	3.95e-22			NCAPG2	0.38027	7.46533e-16	2.57346e-14			DCP1A	0.503746	7.7953e-16	2.26442e-14
FP236383.2	1.54433	0.00025428	0.00604663			SLC9A3R2	-0.660204	1.31e-23	4.34e-22			TRUB1	-0.557153	7.53589e-16	2.59409e-14			CASP4	0.477902	8.29059e-16	2.40486e-14
OPTN	-0.281278	0.000254446	0.00604663			FER	0.580969	1.33e-23	4.42e-22			SAMD8	0.450202	7.58491e-16	2.60724e-14			CBL	0.430715	8.32041e-16	2.41008e-14
SCARA3	-0.350759	0.000255403	0.0060605			GLS	0.4637	1.38e-23	4.58e-22			PRPSAP1	-0.555708	7.75355e-16	2.66143e-14			GK	0.631717	8.72593e-16	2.52395e-14
CHODL	0.457631	0.000260328	0.00616832			DENND2C	1.05589	1.39e-23	4.58e-22			C5orf30	-0.455619	7.96749e-16	2.73098e-14			ETS2	0.472683	8.75964e-16	2.53011e-14
FXR2	0.313134	0.000262474	0.00620821			IDS	0.450188	1.39e-23	4.58e-22			SEC24A	0.402287	8.17126e-16	2.79686e-14			ADRA2B	-0.823378	8.82091e-16	2.5442e-14
AC090114.2	-0.688082	0.000262777	0.00620821			UBE4A	0.489539	1.46e-23	4.81e-22			SMARCD3	-0.529823	8.49839e-16	2.90472e-14			MEN1	-0.544296	9.11811e-16	2.6262e-14
NSUN5P2	-0.62761	0.000265343	0.0062597			GPATCH11	0.751394	1.48e-23	4.86e-22			PFDN2	0.396436	8.65956e-16	2.95563e-14			PBX2	-0.479452	9.22539e-16	2.65334e-14
PCDH7	-0.278406	0.000266161	0.00626988			TUT7	0.557853	1.57e-23	5.17e-22			PSMA4	0.335104	8.68048e-16	2.95859e-14			HMMR	0.503297	9.41157e-16	2.69982e-14
RBM19	0.360792	0.000267169	0.00628078			GPR162	-0.736022	1.59e-23	5.22e-22			PDIA3	0.313003	8.72459e-16	2.96943e-14			TRIM65	-0.562808	9.4135e-16	2.69982e-14
CDC25A	0.340504	0.000267399	0.00628078			MLXIPL	-1.02855	1.77e-23	5.8e-22			S100A1	-0.707765	8.74865e-16	2.97343e-14			KDM5C	0.423217	9.57463e-16	2.74217e-14
MEGF8	-0.403409	0.00026818	0.00629			MTO1	0.496979	1.83e-23	5.99e-22			RPL22	-0.321092	8.82686e-16	2.9958e-14			SLC8A1	-0.381016	9.65154e-16	2.76031e-14
ZSCAN26	-0.680512	0.000270703	0.00634			PRELID1	0.364804	1.94e-23	6.33e-22			LAMB1	-0.453983	9.52226e-16	3.22728e-14			HPS5	0.459749	1.0634e-15	3.03704e-14
AMBRA1	-0.326118	0.000274886	0.00642869			GOLGA4	0.46192	1.99e-23	6.5e-22			DLG5	-0.34844	9.70961e-16	3.28617e-14			MED13	0.490322	1.07925e-15	3.07797e-14
SYBU	0.373185	0.000281899	0.0065832			NHSL1	-0.800354	2.16e-23	7.03e-22			GSTO2	-0.490034	9.98047e-16	3.37312e-14			KLF6	0.504345	1.09003e-15	3.10438e-14
TBC1D2B	-0.355148	0.000284554	0.00662962			CTTNBP2	0.669224	2.23e-23	7.26e-22			SLC44A4	1.35844	1.02067e-15	3.44475e-14			AGO3	0.518297	1.19137e-15	3.38826e-14
STK33	-0.470969	0.000284705	0.00662962			CRYAB	0.881353	2.24e-23	7.27e-22			LMO1	-0.767472	1.0333e-15	3.48253e-14			MGAT4B	-0.38221	1.22048e-15	3.46618e-14
OSBPL5	-0.786255	0.000285413	0.00662994			ARRDC4	0.73505	2.33e-23	7.56e-22			RBBP9	-0.578437	1.07284e-15	3.61075e-14			RAB29	-0.54148	1.22493e-15	3.47398e-14
TSC22D3	0.344267	0.000285537	0.00662994			ILF2	0.341697	2.4e-23	7.79e-22			PSMD8	0.429818	1.1848e-15	3.982e-14			PPP2R2C	-1.02809	1.2958e-15	3.66987e-14
AC099560.2	-0.421735	0.00029263	0.00678492			SORCS1	0.809817	2.41e-23	7.8e-22			CENPX	0.526767	1.23687e-15	4.15126e-14			UNC119B	-0.489478	1.40948e-15	3.98629e-14
JMJD6	0.314615	0.000293255	0.0067897			DNAJB11	0.611112	2.57e-23	8.31e-22			SPON1	-0.294223	1.24458e-15	4.17132e-14			SEMA6C	-0.803012	1.44504e-15	4.08118e-14
SLC52A2	0.354287	0.000302565	0.00699525			SLC25A16	0.632329	2.66e-23	8.59e-22			CASP4	0.440532	1.27496e-15	4.26723e-14			PMM1	0.616309	1.45395e-15	4.10067e-14
FAM168A	-0.280504	0.000304199	0.00702302			SLC29A1	-0.505874	2.81e-23	9.04e-22			UBR7	0.420844	1.31306e-15	4.38867e-14			ITGB4	-0.694193	1.52946e-15	4.30766e-14
B4GALT3	0.359131	0.000304808	0.00702705			RB1CC1	0.425255	2.81e-23	9.04e-22			ARFGAP3	0.50534	1.36541e-15	4.55734e-14			GPM6A	1.60986	1.55314e-15	4.36832e-14
SND1-IT1	3.61629	0.000312691	1			WDR44	0.668364	2.97e-23	9.56e-22			WDR44	0.539776	1.37569e-15	4.58532e-14			PTEN	-0.440819	1.71133e-15	4.8066e-14
FAM217B	-0.447501	0.000315167	0.00725556			AUP1	-0.552476	3.11e-23	1e-21			ANKRD27	0.39391	1.38568e-15	4.61225e-14			CCDC93	0.401846	1.74454e-15	4.89312e-14
MAP3K12	-0.387265	0.000315925	0.00726269			MTHFD2	0.410037	3.68e-23	1.18e-21			DLGAP1	0.923141	1.53838e-15	5.11348e-14			RBM11	0.875477	2.00549e-15	5.6173e-14
ZFAND2A	0.319421	0.000317397	0.00727838			DFFA	-0.438148	3.88e-23	1.24e-21			KDM1B	0.498623	1.55814e-15	5.17206e-14			LMF2	0.404901	2.08032e-15	5.81889e-14
OGT	-0.278629	0.000317506	0.00727838			SLC35E2B	-0.515393	4.02e-23	1.29e-21			AIFM2	0.526012	1.6097e-15	5.33585e-14			NOCT	0.969215	2.10355e-15	5.87579e-14
ABCA2	-0.426942	0.000318073	0.00728108			UGGT1	0.402703	4.27e-23	1.36e-21			FBRS	0.405146	1.66153e-15	5.49407e-14			SNRNP25	0.46681	2.15986e-15	6.02482e-14
DOK5	-0.474998	0.000320797	0.00732379			NFIL3	0.745756	4.79e-23	1.53e-21			ABCB10	-0.512235	1.66197e-15	5.49407e-14			MAP1B	1.44969	2.2128e-15	6.16406e-14
SPRY1	-0.451608	0.000320842	0.00732379			METRN	-0.751254	4.96e-23	1.58e-21			AFAP1L1	1.65939	1.66965e-15	5.51191e-14			ANKRD27	0.430524	2.25942e-15	6.28533e-14
SNCG	0.457825	0.000321903	0.00733766			TLR6	2.50378	4.98e-23	1.59e-21			KCTD17	-0.904063	1.70545e-15	5.62239e-14			ZNF252P	-0.6354	2.41075e-15	6.69714e-14
NPTXR	-0.597965	0.000328282	0.00747256			ZNF331	0.391549	5.02e-23	1.59e-21			TAP1	0.424649	1.71844e-15	5.65752e-14			MGAT3	-0.477157	2.50084e-15	6.93796e-14
AL590560.1	-0.70278	0.00032969	0.0074941			MYL12A	0.448415	5.05e-23	1.6e-21			AC020916.1	0.451492	1.72652e-15	5.67637e-14			BACH1	0.512255	2.52017e-15	6.98208e-14
SLC35A1	-0.726786	0.000331856	0.00753276			TNS2	-0.776959	5.41e-23	1.71e-21			ATP1A1	0.34226	1.74585e-15	5.72994e-14			DLGAP3	-0.512102	2.62201e-15	7.25435e-14
JUNB	0.369143	0.000340524	0.00771455			NBEAL2	-0.598976	5.65e-23	1.78e-21			PIM2	0.495011	1.74755e-15	5.72994e-14			C6orf62	0.370899	2.68651e-15	7.42271e-14
SIGLEC1	-0.942952	0.000340817	0.00771455			AL139289.1	1.33639	5.65e-23	1.78e-21			HELLS	0.519412	1.77056e-15	5.7975e-14			CCSER2	0.462627	2.699e-15	7.44711e-14
SEMA6D	-0.508091	0.000341413	0.00771727			KIAA0319	0.901392	5.73e-23	1.81e-21			TTC33	-0.543737	1.77468e-15	5.80314e-14			SCNM1	0.400677	2.75151e-15	7.58174e-14
C12orf60	0.566103	0.000342162	0.00772344			CTTN	0.337756	6.16e-23	1.94e-21			FILIP1	0.702916	1.78378e-15	5.82501e-14			TFDP1	-0.337145	2.91142e-15	8.01152e-14
EFHD1	-0.786797	0.000344487	0.00776509			NCOR2	-0.545286	6.19e-23	1.95e-21			IGFBP4	-0.411681	1.85498e-15	6.04932e-14			TLR6	2.31661	2.99694e-15	8.23572e-14
KDM1B	0.349511	0.000350686	0.00788683			NSFL1C	0.590559	6.46e-23	2.03e-21			MPST	-0.529914	1.88567e-15	6.14114e-14			MDM2	0.54809	3.34351e-15	9.17573e-14
PTS	0.272216	0.000351086	0.00788683			HBP1	0.486162	8.42e-23	2.64e-21			SPATA13	0.597755	1.9205e-15	6.24614e-14			PKD2	-0.733535	3.42209e-15	9.37873e-14
TSPYL2	0.305226	0.000351348	0.00788683			RAE1	0.378872	8.44e-23	2.64e-21			FAM168A	-0.372593	1.97452e-15	6.41322e-14			NOL9	0.462312	3.45447e-15	9.45476e-14
CPNE2	-0.485056	0.00035224	0.00789593			ATP5F1D	-0.741867	8.6e-23	2.69e-21			ASB13	-0.557816	2.14336e-15	6.95225e-14			C3orf58	0.606449	3.72762e-15	1.01887e-13
AC009403.1	-0.901541	0.000354496	0.00793017			FKBP2	0.584722	8.62e-23	2.7e-21			VPS53	0.474493	2.25989e-15	7.32041e-14			APOBEC3C	-0.59343	3.7454e-15	1.02235e-13
CCDC57	-0.425484	0.000354746	0.00793017			PACSIN3	-0.554008	9e-23	2.81e-21			RSPO3	-1.42375	2.30346e-15	7.45154e-14			ZNF280C	0.688569	3.75749e-15	1.02428e-13
UBAP1L	0.77004	0.000356457	0.00795744			OSBPL8	0.528841	9.25e-23	2.88e-21			ARHGEF3	-0.499573	2.36755e-15	7.64864e-14			MME	-0.662896	4.14955e-15	1.12964e-13
MYT1	-1.14216	0.000360093	0.00802754			CREBRF	0.632462	1.01e-22	3.14e-21			KIF12	-0.824611	2.4221e-15	7.81443e-14			GNG12	-0.572471	4.43191e-15	1.2049e-13
AC026403.1	0.519609	0.000363853	0.00809642			GSTO2	-0.554927	1.07e-22	3.34e-21			ING1	0.382846	2.51665e-15	8.10758e-14			UBE2K	0.478704	4.49408e-15	1.22017e-13
WNT7A	-0.376107	0.000364182	0.00809642			MPST	-0.626788	1.1e-22	3.41e-21			WDR26	0.375812	2.51967e-15	8.10758e-14			ZNF281	0.460945	4.98409e-15	1.35141e-13
ETS2	0.301029	0.000367953	0.00816905			EFNB2	-0.471244	1.13e-22	3.49e-21			PQLC2	0.598647	2.55329e-15	8.20481e-14			BRF1	-0.477164	5.18002e-15	1.40267e-13
DCAF12L1	2.85478	0.000371632	1			NOX4	-0.478484	1.17e-22	3.62e-21			CPNE2	-0.864859	2.58465e-15	8.29456e-14			RUSC2	0.622643	5.24182e-15	1.41752e-13
HSD17B6	0.381362	0.000371685	0.00824062			MEX3A	-0.498922	1.22e-22	3.76e-21			PSMC6	0.334956	2.64958e-15	8.49165e-14			STK4	0.352964	5.42975e-15	1.46639e-13
COL23A1	-0.576455	0.000372776	0.00825352			ANKS6	-0.487009	1.25e-22	3.85e-21			AMBP	0.709774	2.67712e-15	8.56854e-14			NXPE3	0.54338	5.84594e-15	1.5767e-13
DENND5B	-0.303608	0.000373712	0.00826297			GAN	0.715999	1.35e-22	4.18e-21			RIN2	-0.448669	2.81789e-15	9.0072e-14			PIP4P1	0.543431	6.71481e-15	1.80865e-13
LARS2	-0.368655	0.000380813	0.0084085			EDEM3	0.416632	1.78e-22	5.49e-21			PHF8	0.391528	2.85894e-15	9.12632e-14			KMT2C	0.393382	6.76993e-15	1.82109e-13
SLC2A12	-0.334674	0.000381915	0.00842137			SLC19A2	0.582463	1.87e-22	5.75e-21			CARD19	0.551635	2.94944e-15	9.40279e-14			ARHGEF11	-0.440148	7.07099e-15	1.89956e-13
ALDOC	0.357129	0.000387914	0.00854202			PLCD3	-0.439833	1.89e-22	5.81e-21			SSR1	0.403721	3.12695e-15	9.95556e-14			NHSL1	-0.654208	7.09463e-15	1.9034e-13
CTSF	-0.293814	0.000393896	0.00866196			PSMD11	0.418619	1.91e-22	5.85e-21			ABHD2	0.43211	3.15754e-15	1.00397e-13			C1S	0.421935	7.52489e-15	2.01617e-13
THRB	-0.346311	0.000401204	0.00881071			WDR34	-0.480523	1.93e-22	5.92e-21			TTBK2	0.579151	3.3692e-15	1.06987e-13			CSPG5	-0.545923	7.94269e-15	2.12532e-13
EHD4	0.301362	0.000405854	0.00890079			KIF1B	0.409784	1.95e-22	5.96e-21			TRIM37	0.429984	3.59308e-15	1.13946e-13			ANKRD2	0.473745	8.13144e-15	2.17297e-13
AIG1	-0.379303	0.000408239	0.00893824			MAPK9	0.419055	1.95e-22	5.96e-21			C2CD5	-0.591052	3.65835e-15	1.15864e-13			ABHD2	0.458729	8.20681e-15	2.19024e-13
GSAP	0.535921	0.000408665	0.00893824			VIM	-0.328767	2.18e-22	6.64e-21			PSORS1C3	0.774934	3.69272e-15	1.16799e-13			MAPK8IP1	-0.366306	8.35657e-15	2.22729e-13
DLK2	-0.477614	0.000410638	0.00896929			NAT8L	-0.672625	2.23e-22	6.8e-21			ATP10D	0.526804	3.7568e-15	1.18671e-13			SPATA13	0.642343	8.5911e-15	2.28681e-13
ENPEP	-1.07138	0.000412467	0.00899564			MTPN	0.336316	2.24e-22	6.82e-21			CTSD	0.479417	3.8827e-15	1.2237e-13			GDI1	0.388514	8.66948e-15	2.30466e-13
ARHGEF26	0.4686	0.000413486	0.00899564			IGF2R	0.357631	2.28e-22	6.94e-21			SDF2L1	0.532288	3.88405e-15	1.2237e-13			COG5	0.404155	9.11758e-15	2.42062e-13
DCAF6	-0.293653	0.00041351	0.00899564			TRIM37	0.499599	2.33e-22	7.06e-21			PTEN	-0.438776	4.01924e-15	1.26465e-13			LIN54	0.606286	9.40363e-15	2.49331e-13
NOXA1	-0.73498	0.000415106	0.00901826			TUBA1C	0.387323	2.4e-22	7.28e-21			NDUFA4	-0.3845	4.05064e-15	1.27287e-13			BCAS2	0.412129	9.69553e-15	2.56736e-13
RHOU	0.818446	0.000422032	0.00915646			SLC39A10	0.384461	2.73e-22	8.25e-21			MFSD1	0.427283	4.07952e-15	1.28028e-13			SYNJ2BP	-0.525498	1.01388e-14	2.68075e-13
LINC01132	-0.607312	0.000425995	0.00923008			NIPSNAP1	-0.406103	2.84e-22	8.57e-21			MCM2	-0.496119	4.10965e-15	1.28806e-13			EPB41	0.363576	1.01501e-14	2.68075e-13
TRAV30	2.08447	0.000428019	1			ADRM1	0.478958	2.85e-22	8.59e-21			DST	0.812683	4.16161e-15	1.30266e-13			DNAJC3	0.446843	1.01647e-14	2.68115e-13
CLDN9	-0.855917	0.000432408	0.00935652			SLC7A5	0.5813	2.98e-22	9e-21			C11orf58	-0.432377	4.19082e-15	1.31011e-13			REC8	-0.525372	1.02045e-14	2.68814e-13
INSIG1	0.291798	0.000436334	0.00942889			QSOX1	0.350953	3.02e-22	9.11e-21			GPNMB	1.15364	4.27445e-15	1.33452e-13			YOD1	0.581307	1.04858e-14	2.75869e-13
ANKRD27	0.278542	0.000438122	0.00945491			LGMN	0.423109	3.49e-22	1.05e-20			SLC2A4RG	-0.505297	4.49559e-15	1.40175e-13			NUCKS1	-0.470777	1.07128e-14	2.81478e-13
EI24	-0.323015	0.000438826	0.00945751			MAN1A2	0.430339	3.84e-22	1.15e-20			CEP85	0.387542	4.50212e-15	1.40198e-13			BAG1	0.342673	1.08538e-14	2.84814e-13
CASTOR3	-0.351011	0.000444842	0.00957439			MFSD1	0.592778	4.32e-22	1.3e-20			BCAP31	0.382676	4.5465e-15	1.41398e-13			FABP3	-0.565719	1.09339e-14	2.86546e-13
PPP2R2C	-0.468683	0.00044543	0.00957439			NIP7	0.469373	4.53e-22	1.36e-20			CCSER2	0.431589	4.82855e-15	1.49977e-13			DAP3	0.314845	1.09598e-14	2.86855e-13
AC211486.3	-2.43878	0.000447164	1			VBP1	0.511336	4.59e-22	1.37e-20			DERL1	0.371084	4.86796e-15	1.51007e-13			ALDOC	0.438238	1.18422e-14	3.09554e-13
TCF19	0.288765	0.000448478	0.00962714			PBX2	-0.45226	4.8e-22	1.43e-20			CSRP1	-0.42241	4.98344e-15	1.54391e-13			TBC1D2B	-0.678677	1.21451e-14	3.17065e-13
GREB1	0.826958	0.000454871	0.00974813			NCSTN	0.335679	5.13e-22	1.53e-20			RUBCN	0.43276	5.13235e-15	1.58801e-13			LMO3	-0.786766	1.23518e-14	3.22048e-13
NPC1	0.266871	0.000455318	0.00974813			C5orf15	0.418055	5.19e-22	1.55e-20			SRP68	-0.382842	5.16327e-15	1.59553e-13			BTBD10	0.470552	1.25624e-14	3.2712e-13
AVPI1	0.343464	0.00045707	0.00975345			EGR1	0.95028	5.26e-22	1.57e-20			AJAP1	-0.417499	5.19357e-15	1.60284e-13			PRPSAP1	-0.611704	1.3269e-14	3.45079e-13
LINC00621	0.675906	0.000457367	0.00975345			SLC4A2	-0.395521	5.34e-22	1.59e-20			BCAS4	-0.673429	5.28749e-15	1.62975e-13			CCDC85C	-0.554118	1.34109e-14	3.48324e-13
TTC30B	-0.473365	0.000457372	0.00975345			DUSP1	0.643648	5.62e-22	1.67e-20			MRPS2	-0.598691	5.30444e-15	1.63289e-13			DDRGK1	0.463274	1.36273e-14	3.53493e-13
SELENOK	0.313759	0.000459857	0.00979357			PFN2	0.342943	6.2e-22	1.84e-20			ABHD4	0.446992	5.32184e-15	1.63616e-13			LONP2	-0.467523	1.40588e-14	3.63844e-13
PHYH	-0.311555	0.000465684	0.00990464			SH3PXD2A	-0.460053	6.43e-22	1.91e-20			SUSD2	-0.894048	5.34337e-15	1.64069e-13			NDUFA1	-0.422151	1.40621e-14	3.63844e-13
PSMB2	0.253348	0.00046734	0.00992181			LAPTM4A	0.395985	6.53e-22	1.93e-20			ANKS6	-0.419932	5.47821e-15	1.67996e-13			ABCF3	0.407501	1.41357e-14	3.65285e-13
ZNF699	0.57369	0.000467715	0.00992181			BCAT1	-0.371436	6.58e-22	1.94e-20			FAM171A2	-0.87185	5.48584e-15	1.68017e-13			LARP4B	0.360836	1.43712e-14	3.709e-13
TSPAN12	0.334579	0.000469875	0.00993659			KMT2C	0.403888	6.59e-22	1.94e-20			MYOF	0.312997	5.65451e-15	1.72964e-13			MARVELD1	-0.664539	1.46132e-14	3.76668e-13
PCDH11X	-0.563447	0.000470224	0.00993659			PPP3CA	0.513293	6.83e-22	2.01e-20			SAMD4B	0.352179	5.97818e-15	1.82633e-13			TFEC	1.48825	1.55025e-14	3.99087e-13
F2RL2	-0.380463	0.00047053	0.00993659			PTK7	-0.395762	6.84e-22	2.01e-20			AZIN1	0.354074	6.10902e-15	1.86395e-13			C2CD2L	0.445626	1.61193e-14	4.14441e-13
SMARCD3	-0.364859	0.000470864	0.00993659			STARD7	0.351382	6.93e-22	2.04e-20			PDGFD	-0.469155	6.15374e-15	1.87522e-13			RPN2	0.332316	1.6192e-14	4.15785e-13
FAM124A	-1.89549	0.000474393	1			CDK6	0.465053	7.78e-22	2.28e-20			CALD1	-0.444591	6.3467e-15	1.93159e-13			GRB2	0.304641	1.63604e-14	4.1958e-13
ZNF185	0.281244	0.000477873	0.0100714			ELL	0.453249	7.81e-22	2.29e-20			KIAA0232	0.402983	7.09437e-15	2.15642e-13			TFE3	0.394221	1.71601e-14	4.39535e-13
AC090912.2	2.08463	0.000477991	1			GM2A	0.41422	7.98e-22	2.34e-20			TESC	1.09211	7.18395e-15	2.18091e-13			BTRC	-0.544118	1.75866e-14	4.49894e-13
MEIS1	-0.27083	0.000490851	0.0103315			ITGB4	-0.69576	9.27e-22	2.71e-20			EMX2	-0.406526	7.33396e-15	2.22365e-13			MAN2B2	0.432741	1.76589e-14	4.51178e-13
RBM5	-0.322488	0.000494602	0.0103969			ZFP36L2	-0.462715	9.57e-22	2.8e-20			CTNNBIP1	-0.553679	7.40472e-15	2.24229e-13			ZNF165	0.613245	1.90043e-14	4.84944e-13
GALNT5	0.611768	0.000495418	0.0104006			KIF14	0.469339	9.63e-22	2.81e-20			RPARP-AS1	-0.604587	7.6356e-15	2.30932e-13			MCM2	-0.438754	1.90586e-14	4.85719e-13
TMEM208	0.313952	0.000497271	0.010426			DLGAP1	1.11198	1e-21	2.92e-20			DDX5	0.328656	7.85767e-15	2.37351e-13			SOX12	-0.45114	1.91239e-14	4.86774e-13
AADACL4	2.43856	0.00049784	1			AP5Z1	0.533377	1.06e-21	3.08e-20			C1S	0.394309	8.59909e-15	2.59422e-13			ELL	0.425757	2.08748e-14	5.30679e-13
AC024293.1	0.413926	0.000500003	0.0104697			DCAF13	0.389478	1.1e-21	3.19e-20			NFIL3	0.582645	8.70301e-15	2.62152e-13			TERF2IP	0.48882	2.15612e-14	5.47445e-13
CUL7	-0.340557	0.000504716	0.0105547			ZNF608	-0.500986	1.21e-21	3.52e-20			PTK7	-0.4313	8.71129e-15	2.62152e-13			MT1F	-1.32912	2.20224e-14	5.58457e-13
MMP24OS	-0.444381	0.00050706	0.0105901			SOD1	0.358221	1.25e-21	3.61e-20			ST3GAL1	0.435949	8.88074e-15	2.66919e-13			VPS53	0.495568	2.20625e-14	5.5878e-13
TBP	0.323719	0.000522497	0.0108985			TOP2B	-0.397977	1.28e-21	3.71e-20			EYA3	0.367625	9.20455e-15	2.76308e-13			UBQLN2	0.429163	2.30517e-14	5.83107e-13
SLC29A3	-0.477072	0.000523761	0.0109034			GARS	0.49785	1.32e-21	3.81e-20			ATPAF1	-0.387609	9.22844e-15	2.76681e-13			PATL1	0.425887	2.34407e-14	5.92212e-13
LMOD1	-0.341611	0.000524079	0.0109034			2025-09-08	-0.542343	1.32e-21	3.81e-20			SDCBP	0.348564	9.25785e-15	2.77219e-13			SLPI	0.399331	2.45924e-14	6.20482e-13
CDKN2C	-0.277733	0.000526475	0.0109392			FICD	1.01976	1.35e-21	3.88e-20			STIL	0.39838	9.61839e-15	2.87659e-13			PLOD3	0.371644	2.46206e-14	6.20482e-13
MFSD2A	0.426627	0.000528066	0.0109582			SIRT7	0.425908	1.49e-21	4.31e-20			UBE4A	0.41511	9.63651e-15	2.87845e-13			ARHGAP45	0.527022	2.4733e-14	6.21854e-13
XPO5	0.258149	0.000530285	0.0109902			TAP1	0.429666	1.53e-21	4.41e-20			NOCT	0.846397	9.89967e-15	2.9534e-13			GAS2L1	-0.620416	2.47361e-14	6.21854e-13
SCGB1A1	5.69541	0.000530902	1			CTDSP1	-0.578952	1.54e-21	4.42e-20			NVL	-0.547042	1.00481e-14	2.99399e-13			CTTN	0.325104	2.51857e-14	6.32376e-13
AC012306.2	-0.881169	0.000531431	0.0109999			PSMC1	0.504087	1.56e-21	4.47e-20			ZNF850	0.632408	1.03682e-14	3.08556e-13			PLXNB1	-0.364735	2.60816e-14	6.54065e-13
PDE6B	-0.389738	0.000547203	0.0113119			TBCB	0.328953	1.56e-21	4.47e-20			EPB41L1	-0.45057	1.06179e-14	3.15598e-13			DSTYK	-0.547325	2.62108e-14	6.56495e-13
LPAR3	0.284483	0.000549137	0.0113368			LIN54	0.665777	1.7e-21	4.86e-20			NR1H3	-0.614946	1.08058e-14	3.2079e-13			APLP2	0.303432	2.67944e-14	6.70289e-13
PIK3IP1	-0.510113	0.000549805	0.0113368			PKN1	-0.388196	1.76e-21	5.05e-20			DKK2	-1.1825	1.1171e-14	3.31223e-13			PTPRG	-0.384587	2.69265e-14	6.72765e-13
ZNF768	-0.418062	0.000554242	0.0113988			ETF1	0.351261	1.79e-21	5.12e-20			GPC5	-0.621903	1.1219e-14	3.3224e-13			GAN	0.621786	2.73553e-14	6.82642e-13
MINCR	-0.811641	0.00055474	0.0113988			NAMPT	0.423019	1.84e-21	5.24e-20			ORMDL2	0.533224	1.16095e-14	3.43384e-13			PLCD3	-0.386675	2.94971e-14	7.35189e-13
ZNF580	-0.557776	0.000554926	0.0113988			ZNF281	0.485708	1.89e-21	5.39e-20			AQP6	-0.840675	1.23844e-14	3.65856e-13			PSMA3	0.389433	2.9599e-14	7.36827e-13
PIGZ	-0.518645	0.00055693	0.0114253			BCAP31	0.371568	2.08e-21	5.93e-20			SNX17	-0.389054	1.24771e-14	3.68144e-13			METTL4	0.520285	3.03259e-14	7.54001e-13
PGM1	-0.27857	0.000557794	0.0114253			RAB11FIP3	-0.52325	2.13e-21	6.06e-20			KLHDC3	-0.412342	1.36287e-14	4.01632e-13			BCAT1	-0.428321	3.06748e-14	7.61746e-13
ZFP69B	0.398329	0.000558329	0.0114253			MIR4435-2HG	0.751398	2.19e-21	6.22e-20			BRF1	-0.44798	1.43337e-14	4.21892e-13			CHPF	0.408636	3.22503e-14	7.99894e-13
ADAMTS8	1.75718	0.000559458	1			UBE2A	0.475443	2.33e-21	6.61e-20			PDGFC	-0.500615	1.47207e-14	4.32757e-13			ATP5MF	-0.590623	3.33054e-14	8.25058e-13
PIM2	0.341053	0.000565176	0.0115508			P4HB	0.334131	2.4e-21	6.79e-20			GTPBP3	-0.615275	1.50893e-14	4.43053e-13			ATG4D	0.403244	3.34994e-14	8.28856e-13
LOX	0.463128	0.000568148	0.0115969			RNF181	0.454012	2.41e-21	6.81e-20			GATAD2B	0.464732	1.51159e-14	4.43296e-13			ALDH5A1	-0.521856	3.35621e-14	8.294e-13
BPNT1	0.267793	0.000574232	0.0117064			ID4	-0.540204	2.49e-21	7.03e-20			VANGL1	-0.481128	1.6454e-14	4.81952e-13			ILF2	0.308265	3.39161e-14	8.36571e-13
IGFBP2	-0.372235	0.000578375	0.011776			MIDN	0.505082	2.62e-21	7.38e-20			RASSF10	-1.21223	1.67715e-14	4.90657e-13			HSPA2	0.428938	3.39345e-14	8.36571e-13
LMO7	-0.382596	0.000581048	0.0118065			ACAP2	0.452497	2.62e-21	7.38e-20			PSMD2	0.349707	1.70114e-14	4.97076e-13			ERLIN2	0.394204	3.47267e-14	8.55066e-13
LRRN4	-1.09138	0.000581327	0.0118065			SLC48A1	-0.506016	2.62e-21	7.39e-20			AR	0.620744	1.71053e-14	4.9896e-13			MEA1	0.429765	3.53469e-14	8.69287e-13
AP003059.1	2.04052	0.000584659	1			NR1H3	-0.684468	2.65e-21	7.45e-20			SLC12A1	-0.921751	1.71172e-14	4.9896e-13			SNX29	0.6023	3.65192e-14	8.97034e-13
RIOK1	0.290147	0.000587398	0.0119148			MALT1	0.554087	2.78e-21	7.8e-20			ABCF3	0.37647	1.7516e-14	5.09867e-13			PAX8	-0.328502	3.70231e-14	9.08315e-13
CAPN2	-0.272355	0.000588958	0.0119309			SDF2L1	0.554452	2.93e-21	8.21e-20			FNDC4	-0.957519	1.75336e-14	5.09867e-13			SLAIN2	0.509287	3.73942e-14	9.16316e-13
IRF6	0.27022	0.000589664	0.0119309			LMO3	-0.877894	2.94e-21	8.24e-20			PLBD2	0.408825	1.79409e-14	5.21084e-13			CNKSR3	0.61984	3.83551e-14	9.38733e-13
PDK2	-0.474587	0.000592689	0.0119772			ABCB6	1.11986	3e-21	8.4e-20			FZD7	0.671245	1.84811e-14	5.36128e-13			AP5Z1	0.454229	3.98586e-14	9.74358e-13
HMGN5	0.5586	0.000593844	0.0119856			TTBK2	0.698146	3.07e-21	8.58e-20			SCARA3	-0.364607	1.96513e-14	5.69392e-13			NFKBIB	0.430231	4.07749e-14	9.95368e-13
CA11	-0.598278	0.000594597	0.0119859			AIFM2	0.535646	3.29e-21	9.17e-20			HUWE1	0.316989	2.0825e-14	6.02616e-13			RAB7A	0.313689	4.08158e-14	9.95368e-13
IL17RC	-0.409694	0.00059767	0.0120328			ABHD14B	-0.5902	3.36e-21	9.38e-20			AL365181.3	1.62896	2.08478e-14	6.02616e-13			PLEKHH3	0.506453	4.1101e-14	1.00112e-12
TRIM73	-0.493982	0.000600119	0.0120671			MRPL11	-0.432523	3.63e-21	1.01e-19			LRFN3	-0.586903	2.12596e-14	6.13786e-13			CALD1	-0.424766	4.16455e-14	1.01317e-12
SCARB1	0.373602	0.000605881	0.0121679			CDC37L1	0.582523	3.78e-21	1.05e-19			SEC24D	0.404987	2.23913e-14	6.45687e-13			ACLY	0.355539	4.41638e-14	1.07316e-12
STC1	0.684294	0.000606649	0.0121683			IMPA1	0.520156	3.8e-21	1.06e-19			FADS2	-0.497281	2.46722e-14	7.10612e-13			NXF1	0.370223	4.42824e-14	1.07476e-12
GYG2	-0.554535	0.000616867	0.0123579			CCDC34	-0.752011	4.06e-21	1.13e-19			CP	0.547344	2.4903e-14	7.16407e-13			KLK10	0.809192	4.72063e-14	1.14436e-12
LINC02437	3.00909	0.000622427	1			MAP1B	1.50691	4.09e-21	1.13e-19			MDFIC	-0.583654	2.60509e-14	7.48538e-13			VTI1B	-0.673036	4.88933e-14	1.18385e-12
PNP	0.295744	0.000622887	0.0124631			POC5	0.699807	4.1e-21	1.14e-19			TFIP11	0.447645	2.6882e-14	7.715e-13			PPP2CA	0.373794	4.96759e-14	1.20137e-12
SLC25A27	-0.364253	0.000633259	0.012655			TCF7L1	-0.870029	4.17e-21	1.15e-19			HPS5	0.39754	2.71906e-14	7.79431e-13			CEP85	0.389475	5.12074e-14	1.23693e-12
LY6E	-0.384889	0.000636237	0.0126838			ATP6AP1	0.311143	4.33e-21	1.2e-19			PBX2	-0.377217	2.81486e-14	8.05938e-13			SCARA3	-0.377629	5.2342e-14	1.26284e-12
AL662890.1	1.32318	0.000636264	0.0126838			UNC119B	-0.494824	4.44e-21	1.23e-19			SNHG18	-0.478861	2.95047e-14	8.43764e-13			NSL1	-0.705835	5.314e-14	1.28058e-12
TRIP11	-0.425252	0.000637253	0.0126853			SLC4A11	-0.558677	4.74e-21	1.31e-19			FAM107A	0.338352	3.03723e-14	8.67549e-13			MPHOSPH10	0.555757	5.40228e-14	1.30032e-12
RERG	0.455588	0.000637905	0.0126853			GMEB1	0.606669	4.74e-21	1.31e-19			CHMP3	-0.385745	3.08654e-14	8.80593e-13			RPS26	-0.381041	5.59314e-14	1.34467e-12
ZNF611	0.452286	0.000643864	0.0127881			ZBTB40	-0.41426	5.06e-21	1.39e-19			MCOLN1	0.744662	3.23493e-14	9.21841e-13			FADS2	-0.547296	5.869e-14	1.40932e-12
PNOC	0.560698	0.000650542	0.0129049			TNPO1	0.377248	5.09e-21	1.4e-19			AP5Z1	0.460726	3.24423e-14	9.23402e-13			BNIP2	0.440312	6.40678e-14	1.53665e-12
HPDL	0.495356	0.000655556	0.0129885			PRRC1	0.383702	5.63e-21	1.54e-19			PLEKHA1	-0.405021	3.32753e-14	9.45997e-13			AKT1S1	0.373235	6.56206e-14	1.57204e-12
TCTN1	-0.483992	0.000659743	0.0130555			FAM3C	0.484473	5.73e-21	1.57e-19			ZBTB7B	0.431249	3.40893e-14	9.68e-13			CANX	0.336189	6.87649e-14	1.64543e-12
DLGAP3	-0.41688	0.000661865	0.0130815			ARNT2	-0.59375	5.86e-21	1.6e-19			KIF1B	0.369811	3.4882e-14	9.89346e-13			TRIM37	0.447175	6.95656e-14	1.66263e-12
TACO1	-0.551626	0.000665947	0.0131462			ARF4	0.32787	5.87e-21	1.6e-19			ATP2B4	-0.428047	3.56747e-14	1.01064e-12			ROM1	0.82773	6.98507e-14	1.66749e-12
LINC01936	-0.511332	0.000666898	0.0131489			GMNN	0.506107	5.92e-21	1.62e-19			FAM3C	0.417938	3.63431e-14	1.02765e-12			MOB3B	-0.464521	7.11307e-14	1.69606e-12
PABPC4	-0.259902	0.000670585	0.0132056			MRPS26	-0.707601	6.67e-21	1.82e-19			SOCS7	0.328183	3.63601e-14	1.02765e-12			DUSP1	0.604274	7.14811e-14	1.70242e-12
DCAF1	0.294207	0.000673192	0.0132408			LMAN1	0.354805	6.69e-21	1.82e-19			SLC29A2	-0.494319	3.70674e-14	1.04642e-12			MYL12A	0.390101	7.29202e-14	1.73467e-12
RAB32	-0.361223	0.00068205	0.0133861			EIF1	0.360032	6.7e-21	1.82e-19			CDKN1C	0.516749	3.79695e-14	1.07063e-12			NSUN3	0.759072	7.35272e-14	1.74707e-12
RRP9	0.344928	0.000682852	0.0133861			PBX1	-0.322432	6.75e-21	1.84e-19			RAB29	-0.474498	4.27705e-14	1.2046e-12			MINDY1	-0.703159	7.40796e-14	1.75814e-12
NOTCH3	-0.51203	0.000683057	0.0133861			TMEM170A	0.662262	7.19e-21	1.95e-19			P3H1	0.426722	4.61622e-14	1.29861e-12			DMAC1	-0.632954	7.47437e-14	1.77184e-12
EIF4A2	-0.276037	0.000695379	0.0136111			AKR1C1	2.25142	8.04e-21	2.18e-19			HPS6	-0.460244	4.66965e-14	1.31212e-12			GAS1	-0.527549	7.49756e-14	1.77527e-12
CCDC92	-0.461096	0.000696701	0.0136205			NLGN2	-0.422468	8.95e-21	2.42e-19			WNT6	-1.65551	4.82994e-14	1.35558e-12			MMACHC	-0.727592	7.58187e-14	1.79314e-12
TMSB15A	-0.698941	0.000697706	0.0136238			CHMP7	0.393668	9.29e-21	2.51e-19			GPR107	0.311598	4.91269e-14	1.37721e-12			ZNF282	-0.3753	7.60634e-14	1.79684e-12
FBXO43	-0.597606	0.000698962	0.0136319			PPP1R2	0.408508	1.03e-20	2.77e-19			MAGOH	0.365897	5.16911e-14	1.44741e-12			TMED9	0.338152	7.74478e-14	1.82743e-12
TRIM22	-0.963158	0.000700811	0.0136515			C2CD2L	0.4445	1.05e-20	2.82e-19			NDRG2	-0.882974	5.19953e-14	1.45424e-12			SPOCK2	0.87351	7.81886e-14	1.84141e-12
TEX261	-0.298724	0.000702258	0.0136633			SELENON	-0.66512	1.1e-20	2.98e-19			SLC25A16	0.560449	5.21332e-14	1.45641e-12			MPST	-0.483133	7.82212e-14	1.84141e-12
AL157931.2	5.65187	0.000720674	1			FAM217B	-0.668495	1.14e-20	3.08e-19			JMJD6	0.376692	5.29086e-14	1.47637e-12			DNAJC19	-0.41707	7.83934e-14	1.84333e-12
FBXO45	0.317084	0.000724693	0.0140828			PIM2	0.507083	1.16e-20	3.12e-19			CRYL1	0.57969	5.53247e-14	1.54201e-12			CIZ1	-0.567922	7.89652e-14	1.85464e-12
FUK	-0.474319	0.00072766	0.0141236			RARRES3	0.760719	1.21e-20	3.25e-19			CYB5R4	0.567502	5.56421e-14	1.54907e-12			TRIM36	0.721236	8.07966e-14	1.89546e-12
GAS1	-0.300664	0.000728979	0.0141322			DCLRE1A	0.642568	1.24e-20	3.33e-19			AQP5	-0.466781	5.75439e-14	1.60017e-12			TMCO4	-0.659316	8.16456e-14	1.91318e-12
RAP2B	0.285985	0.000731653	0.0141671			TNS1	-0.649458	1.26e-20	3.37e-19			IQGAP3	-0.422378	5.89113e-14	1.63631e-12			VGF	0.911788	8.19828e-14	1.91887e-12
CALD1	-0.32274	0.000737024	0.0142541			RSRC2	0.511363	1.29e-20	3.45e-19			DDA1	0.398044	5.93226e-14	1.64585e-12			BPGM	0.444251	8.33139e-14	1.94778e-12
THRB-AS1	-1.60551	0.000738634	1			NABP1	0.449521	1.31e-20	3.51e-19			TRMO	0.584573	6.53808e-14	1.81184e-12			RAB24	0.452881	8.56296e-14	1.99963e-12
GADD45A	0.284271	0.000746994	0.0144297			HLA-C	0.473834	1.33e-20	3.55e-19			RMC1	0.449602	6.58742e-14	1.82342e-12			ATP2B4	-0.435062	8.71027e-14	2.0317e-12
COL4A5	-0.312701	0.000749315	0.0144573			NUP85	-0.418069	1.34e-20	3.58e-19			NOL9	0.422344	6.73258e-14	1.86147e-12			MTA1	-0.390265	8.73525e-14	2.03519e-12
NAALAD2	0.858538	0.00075939	0.0146266			ZCCHC2	0.694267	1.42e-20	3.79e-19			LARS2	-0.508638	6.74031e-14	1.86148e-12			PNP	0.458164	9.61948e-14	2.23865e-12
PFDN2	0.31504	0.000759892	0.0146266			TMEM38B	0.611646	1.51e-20	4.02e-19			SLC30A7	0.475635	6.82605e-14	1.88301e-12			TRAFD1	0.386394	9.74525e-14	2.26532e-12
GLG1	0.252765	0.000763617	0.0146808			NAT14	-0.758142	1.52e-20	4.03e-19			CBL	0.402002	6.91925e-14	1.90654e-12			TLE3	0.537134	9.91254e-14	2.30159e-12
PLEKHD1	-1.10984	0.00076592	0.0147077			MGAT4A	0.557417	1.55e-20	4.1e-19			SLC25A12	-0.472104	7.07179e-14	1.94635e-12			POC5	0.617942	1.00043e-13	2.32025e-12
PIANP	-0.490502	0.000766837	0.0147078			ZNF280C	0.752632	1.61e-20	4.27e-19			YIPF2	0.472613	7.20997e-14	1.98213e-12			AC007923.1	1.94652	1.00186e-13	2.32092e-12
ACLY	0.282193	0.000782249	0.0149857			TMEM129	-0.501027	1.67e-20	4.42e-19			MIR4435-2HG	0.598077	7.57538e-14	2.08022e-12			LIG3	0.454817	1.00411e-13	2.32348e-12
MAP2K1	0.27508	0.000790643	0.0151286			PODXL	-0.326472	1.72e-20	4.55e-19			SLC23A2	-0.600164	8.11697e-14	2.22641e-12			SNIP1	0.467015	1.0573e-13	2.44378e-12
HAPLN3	-0.368755	0.000794798	0.0151902			ZNF618	-0.436987	1.73e-20	4.57e-19			RNF180	-0.589163	8.30049e-14	2.27417e-12			NBL1	-0.6033	1.15299e-13	2.66194e-12
CRY2	0.367909	0.000802868	0.0153128			SECISBP2	0.417849	1.73e-20	4.57e-19			CIZ1	-0.534573	8.35119e-14	2.28546e-12			SYP	0.450269	1.1578e-13	2.67002e-12
CENPX	0.383524	0.000804003	0.0153128			PPP1CC	-0.362215	1.82e-20	4.81e-19			ALDH1B1	-0.379833	8.44621e-14	2.30885e-12			KBTBD8	1.07196	1.19095e-13	2.74336e-12
PCNX2	-0.429188	0.00080405	0.0153128			BRF1	-0.597038	1.86e-20	4.89e-19			PTMS	-0.419991	8.46228e-14	2.31063e-12			NVL	-0.641927	1.24339e-13	2.86091e-12
UBE2T	0.281588	0.000806263	0.0153219			DCP1A	0.521284	1.96e-20	5.16e-19			BMI1	-0.458503	8.82585e-14	2.40719e-12			PRRC2C	0.338574	1.25799e-13	2.89124e-12
BTBD3	0.324832	0.000806415	0.0153219			MED10	0.388766	1.97e-20	5.17e-19			ATP9A	-0.376946	8.98587e-14	2.44807e-12			LRFN3	-0.561394	1.35065e-13	3.10071e-12
PRRT3	-0.660738	0.000810017	0.0153723			ADRA2B	-0.861438	2.01e-20	5.28e-19			KRT15	0.742293	9.35601e-14	2.54604e-12			HAUS1	-0.480868	1.36221e-13	3.12372e-12
FP236383.1	-4.6211	0.000816661	1			LIPG	1.36285	2.06e-20	5.39e-19			NIP7	0.367806	9.56162e-14	2.59906e-12			PIGU	-0.5844	1.3697e-13	3.13737e-12
EML1	-0.519964	0.000833069	0.0157913			AGPAT2	-0.62741	2.08e-20	5.46e-19			AP1G1	0.375281	9.61484e-14	2.60816e-12			IDS	0.477931	1.3872e-13	3.17389e-12
CFAP73	-0.660511	0.000836189	0.0158176			TBC1D2B	-0.730224	2.2e-20	5.75e-19			TFEC	1.27658	9.6169e-14	2.60816e-12			SDCBP	0.345481	1.51012e-13	3.45123e-12
PPP1R1A	1.37056	0.000836409	0.0158176			EDEM2	0.324074	2.22e-20	5.8e-19			IQCE	-0.55299	9.62746e-14	2.60816e-12			SAMD12	-0.648327	1.5245e-13	3.48021e-12
VPS54	-0.423137	0.000839258	0.015853			PGM1	-0.496154	2.28e-20	5.94e-19			BTBD10	0.414795	9.90504e-14	2.68035e-12			CCDC186	0.58217	1.54185e-13	3.51587e-12
IGSF3	-0.420682	0.000846302	0.0159421			LONRF2	-0.443123	2.31e-20	6.02e-19			MT1F	-1.43945	9.9464e-14	2.68853e-12			MAPK9	0.375488	1.63084e-13	3.71462e-12
MIIP	0.386136	0.000846676	0.0159421			FAM160B1	0.546667	2.46e-20	6.41e-19			NCOR2	-0.422307	1.00505e-13	2.71365e-12			IFITM1	0.613203	1.64401e-13	3.74045e-12
ME3	0.454818	0.000846928	0.0159421			UBXN7	0.393996	2.47e-20	6.43e-19			CPE	-0.455636	1.0165e-13	2.74148e-12			SRSF4	0.351426	1.83707e-13	4.17502e-12
CHMP6	-0.593642	0.000849426	0.0159706			NXPE3	0.568008	2.68e-20	6.96e-19			TGFBR3	-0.432471	1.01924e-13	2.74582e-12			UGT2B7	0.607951	1.88512e-13	4.2784e-12
RPL24P4	0.361892	0.000859169	0.0161228			RTN4	0.406619	2.71e-20	7.03e-19			H2AFY2	-0.457324	1.03195e-13	2.77696e-12			EPB41L1	-0.449526	1.88676e-13	4.2784e-12
MED20	-0.298845	0.000859509	0.0161228			BUD23	0.46455	2.98e-20	7.72e-19			FGFR1	-0.894733	1.04472e-13	2.80818e-12			PBX1	-0.314755	1.91672e-13	4.3415e-12
KRT17	-1.20231	0.000865441	0.0162153			VGF	1.01068	2.99e-20	7.74e-19			COG5	0.363936	1.07923e-13	2.89772e-12			PCMTD2	-0.46376	1.935e-13	4.37804e-12
PGA5	2.20511	0.000869878	1			HGH1	-0.53976	3.45e-20	8.91e-19			ZBTB47	-0.638644	1.10432e-13	2.9618e-12			ATP11B	0.384921	1.95721e-13	4.42338e-12
SDCBP2	0.759335	0.000873334	0.0163229			PSMB7	0.35521	3.46e-20	8.95e-19			C1orf52	0.445591	1.10601e-13	2.96307e-12			AKR1B10	1.59145	2.14767e-13	4.84845e-12
BEST1	1.07934	0.000873501	0.0163229			SS18L1	0.378641	3.6e-20	9.3e-19			SLAIN2	0.436304	1.17095e-13	3.13356e-12			SOCS3	0.473818	2.15114e-13	4.85091e-12
DNAJC4	-0.388053	0.000874205	0.0163229			ADCK2	-0.41986	3.62e-20	9.35e-19			STAMBP	0.335769	1.22583e-13	3.27678e-12			UTP11	0.456689	2.17028e-13	4.88865e-12
BOC	-0.341889	0.000875637	0.0163308			RANGAP1	-0.454997	3.67e-20	9.45e-19			MVB12B	-0.80165	1.25237e-13	3.34404e-12			HNRNPA1	-0.284095	2.25344e-13	5.07035e-12
DUSP8	-0.421069	0.000885564	0.0164969			MYO1C	-0.349729	3.79e-20	9.74e-19			NXF1	0.364996	1.29129e-13	3.44352e-12			FASTKD1	-0.59375	2.32714e-13	5.23019e-12
DNM1	-0.466945	0.000890578	0.0165664			MEN1	-0.61597	4e-20	1.03e-18			HSD17B6	0.580783	1.29248e-13	3.44352e-12			TMEM38A	-0.512375	2.32961e-13	5.23019e-12
TRMT1	0.344507	0.000891338	0.0165664			SLC26A11	0.539032	4.07e-20	1.05e-18			FHL1	-0.425703	1.298e-13	3.45442e-12			COL4A3	1.69937	2.34225e-13	5.25277e-12
ZNF837	-0.618736	0.000893376	0.0165853			GPATCH3	0.701347	4.19e-20	1.07e-18			ATP1B3	0.364904	1.41445e-13	3.7568e-12			PIP5K1A	0.354999	2.34785e-13	5.25955e-12
RAB3GAP1	-0.29887	0.000902192	0.0167298			ATG4D	0.395411	4.24e-20	1.09e-18			DUXAP10	-0.478931	1.41473e-13	3.7568e-12			SRP54	0.380468	2.37039e-13	5.3042e-12
S1PR3	-0.418865	0.000921389	0.0170533			WDR43	0.382571	4.43e-20	1.13e-18			DUXAP8	-0.472597	1.49757e-13	3.97241e-12			RNPEPL1	-0.673652	2.38537e-13	5.33187e-12
KCNJ13	5.66444	0.000921502	1			FAM210B	-0.517201	4.66e-20	1.19e-18			ARRDC4	0.539251	1.51482e-13	4.01378e-12			WDR44	0.619645	2.40494e-13	5.36971e-12
ST3GAL5	-0.452968	0.000921744	0.0170533			TNFRSF21	0.577812	4.67e-20	1.19e-18			VTI1B	-0.579803	1.60583e-13	4.25026e-12			YWHAZ	0.341922	2.48743e-13	5.54781e-12
RPL37P6	1.05787	0.000927155	0.0171339			AC022149.1	0.629139	4.68e-20	1.19e-18			CERK	-0.373819	1.61972e-13	4.28233e-12			SLC39A13	-0.37683	2.5231e-13	5.62121e-12
GPR55	4.55946	0.000936172	1			SNX29	0.606581	4.82e-20	1.23e-18			TCF7L1	-0.680059	1.63134e-13	4.30833e-12			ZNF37A	-0.685496	2.57529e-13	5.73121e-12
ANXA2R	-0.540128	0.000943043	0.0174076			RAB7A	0.312855	5.61e-20	1.43e-18			DEDD2	0.466751	1.63459e-13	4.31221e-12			SENP5	0.388335	2.5884e-13	5.7541e-12
TMEM132A	-0.353494	0.000945272	0.0174289			ETV5	0.589758	5.92e-20	1.51e-18			NFE2L1	0.33282	1.68956e-13	4.44932e-12			HSP90B1	0.32031	2.71108e-13	6.02026e-12
PAX8-AS1	-0.340046	0.000949013	0.017478			PARP10	-0.456433	5.98e-20	1.52e-18			CEMIP2	0.587983	1.69025e-13	4.44932e-12			METAP2	-0.394638	2.72118e-13	6.0361e-12
NACC2	-0.359876	0.000959587	0.0176303			SENP5	0.398055	6.26e-20	1.59e-18			TERF2IP	0.409141	1.79961e-13	4.73205e-12			OSTM1	0.52557	2.72953e-13	6.04803e-12
LAMP3	0.978575	0.000959696	0.0176303			PPDPF	-0.592044	6.39e-20	1.62e-18			DACH2	1.78879	1.80986e-13	4.75385e-12			CPD	0.372909	2.80616e-13	6.21107e-12
MAGOH	0.263303	0.000960546	0.0176303			ATP6V0A2	0.469573	6.46e-20	1.63e-18			NBEAL2	-0.473566	1.83192e-13	4.80657e-12			MDM4	0.458479	2.88269e-13	6.37353e-12
SYNC	-0.97763	0.000963026	0.0176558			THSD4	0.849106	6.78e-20	1.71e-18			FER	0.4122	1.87068e-13	4.90291e-12			CXorf40B	0.505464	2.89149e-13	6.38605e-12
FASN	0.367429	0.000966032	0.0176909			RARS2	0.488235	7.25e-20	1.83e-18			AUP1	-0.492326	1.87717e-13	4.9146e-12			DLG5	-0.42032	2.91196e-13	6.42429e-12
CDC42BPG	-0.369703	0.000972062	0.0177691			KLF6	0.521347	7.46e-20	1.88e-18			HIST2H2BF	1.43466	1.92742e-13	5.0407e-12			AL139289.1	1.13864	2.9564e-13	6.51528e-12
FRS3	-0.660911	0.000972491	0.0177691			LAMA2	-0.417102	7.56e-20	1.9e-18			SLC26A11	0.451456	1.96322e-13	5.12779e-12			TUG1	-0.435347	2.96995e-13	6.53806e-12
BICDL1	0.373402	0.000986861	0.0179983			HBEGF	0.629091	7.64e-20	1.92e-18			ACBD3	0.367233	1.96497e-13	5.12779e-12			JMY	0.53189	3.04232e-13	6.69016e-12
RNF170	-0.430029	0.000987258	0.0179983			ALG13	0.482963	7.76e-20	1.95e-18			PSMB5	0.385793	2.01846e-13	5.26171e-12			ST3GAL1	0.450092	3.12103e-13	6.85583e-12
UNC119B	-0.283047	0.000989278	0.0180149			SYDE1	-0.418217	8.08e-20	2.03e-18			HSF2	0.455852	2.02717e-13	5.27873e-12			CCDC34	-0.754383	3.18876e-13	6.99705e-12
CCZ1	0.572547	0.000994008	0.0180807			KIAA1549	-0.57323	8.3e-20	2.08e-18			TRIB3	0.551942	2.08593e-13	5.42589e-12			ZNF850	0.614835	3.22088e-13	7.05993e-12
MIR22HG	0.313448	0.00099865	0.0181448			MAPK8IP1	-0.422775	8.4e-20	2.11e-18			MEN1	-0.489106	2.14624e-13	5.57677e-12			LMNA	0.336909	3.31468e-13	7.25772e-12
BASP1P1	0.618487	0.00100661	0.0182688			CIAO2A	-0.467967	8.58e-20	2.15e-18			LIN54	0.516353	2.17741e-13	5.65167e-12			VAV3	-0.357601	3.35822e-13	7.34516e-12
PPL	-0.650907	0.00100836	0.0182802			CCDC85C	-0.495325	8.88e-20	2.22e-18			DLGAP1-AS2	0.768102	2.23306e-13	5.78991e-12			CTXN1	-0.650818	3.57272e-13	7.80593e-12
GAS6	-0.391404	0.00102547	0.0185697			GNL1	0.31438	9.68e-20	2.42e-18			DCP1A	0.437787	2.28207e-13	5.91064e-12			ZNF37BP	-0.530497	3.58123e-13	7.81613e-12
IDO1	1.10683	0.00103183	0.0186639			AASDHPPT	-0.544578	9.8e-20	2.45e-18			KBTBD8	1.0125	2.30959e-13	5.9755e-12			LIN7C	0.642094	3.63159e-13	7.91757e-12
TRAC	-2.2685	0.00104164	1			NUFIP2	0.382712	1.03e-19	2.58e-18			SLC12A8	1.35817	2.37346e-13	6.13419e-12			TM2D3	0.530794	3.68421e-13	8.01697e-12
TPM1	-0.24515	0.00104641	0.0188991			OBSL1	-0.444619	1.04e-19	2.59e-18			NSUN3	0.607462	2.4088e-13	6.21888e-12			RAD23B	0.338327	3.68506e-13	8.01697e-12
CDKN2D	0.336956	0.00104716	0.0188991			RAB5A	0.520537	1.06e-19	2.63e-18			REEP5	-0.358699	2.42296e-13	6.24875e-12			RINT1	-0.559014	3.71156e-13	8.066e-12
TMEM127	-0.288771	0.0010499	0.0189274			TXN	0.348972	1.14e-19	2.84e-18			COL5A1	-0.865597	2.481e-13	6.39161e-12			HGH1	-0.489815	3.81521e-13	8.28242e-12
ZMIZ1	-0.314386	0.00105109	0.0189277			CAVIN1	-0.307969	1.24e-19	3.07e-18			SAMD12	-0.63725	2.53914e-13	6.53077e-12			MON1B	0.368178	3.82089e-13	8.28593e-12
GRM4	1.19696	0.00105578	0.0189727			ARHGAP23	-0.400699	1.55e-19	3.85e-18			ZNF805	1.35707	2.54042e-13	6.53077e-12			YIPF1	0.508728	3.83165e-13	8.30042e-12
PLEKHG1	0.704423	0.00105592	0.0189727			XIAP	0.368917	1.55e-19	3.85e-18			NSL1	-0.597588	2.72322e-13	6.99326e-12			SCGB2A1	5.0092	3.94936e-13	8.54631e-12
PRELID3BP4	1.38258	0.00106305	0.0190795			ZEB1	0.65001	1.55e-19	3.85e-18			SUPT6H	0.334953	2.7458e-13	7.04376e-12			CAVIN1	-0.31916	3.97612e-13	8.5951e-12
SLC28A3	-0.872324	0.00106794	0.0191462			MORF4L2	0.301167	1.56e-19	3.85e-18			SIRT7	0.420275	2.78239e-13	7.13006e-12			RIOK1	0.391951	4.13183e-13	8.92221e-12
MIR1270	5.02464	0.00107963	1			RPS26	-0.462477	1.57e-19	3.88e-18			MRPL35	-0.433029	2.87475e-13	7.35894e-12			NCOA5	-0.517908	4.28528e-13	9.24376e-12
GCDH	0.367536	0.00108139	0.0193349			MRPS2	-0.79535	1.6e-19	3.95e-18			HK2	0.303641	2.93773e-13	7.51219e-12			PTPN1	0.31888	4.30048e-13	9.26674e-12
EDA	0.36088	0.00108249	0.0193349			SPRED3	0.953602	1.61e-19	3.97e-18			GRPEL1	0.330883	2.9444e-13	7.5213e-12			MYOF	0.295579	4.30533e-13	9.26739e-12
VSIG10	-0.425874	0.00108311	0.0193349			HNRNPA1	-0.382626	1.64e-19	4.03e-18			JAG1	0.450881	2.95894e-13	7.55045e-12			ERN1	0.727825	4.32196e-13	9.29335e-12
ZNF425	-0.55839	0.00108324	0.0193349			LARS2	-0.622613	1.66e-19	4.07e-18			RAB26	-0.705178	2.98537e-13	7.60985e-12			ADAM15	0.348102	4.38801e-13	9.42544e-12
SPTAN1	-0.268339	0.00109357	0.0194875			EPHX1	-0.419716	1.74e-19	4.27e-18			TNRC18	-0.426696	3.06727e-13	7.81039e-12			MRPL14	0.374549	4.52377e-13	9.7068e-12
EMC4	0.264492	0.0010942	0.0194875			MOB3B	-0.492719	1.92e-19	4.72e-18			UBE2C	0.355185	3.12817e-13	7.95706e-12			UBR7	0.422747	4.60282e-13	9.86602e-12
MLXIPL	-0.493127	0.00110012	0.0195715			AES	-0.423179	1.96e-19	4.8e-18			METTL4	0.496535	3.15586e-13	8.01907e-12			ETV5	0.504165	4.76551e-13	1.0204e-11
RPS18P12	0.797058	0.00110246	0.0195917			PSMD3	-0.460224	1.99e-19	4.87e-18			ERLIN2	0.341275	3.1869e-13	8.08943e-12			PEMT	-0.777182	4.95807e-13	1.06052e-11
SLC9A1	-0.596839	0.00111568	0.0198048			MEGF8	-0.531048	2.12e-19	5.2e-18			GMEB1	0.482684	3.19647e-13	8.10522e-12			TRMT1	0.347169	5.62074e-13	1.201e-11
PKP2	0.284366	0.00111714	0.019809			PQLC1	-0.52311	2.15e-19	5.25e-18			IKBKE	-0.719544	3.30231e-13	8.35688e-12			TCF7L1	-0.766757	5.72182e-13	1.22131e-11
TTC5	-0.652797	0.00112217	0.0198766			LAMP1	0.377753	2.17e-19	5.29e-18			BCAT2	-0.544775	3.30264e-13	8.35688e-12			CENPJ	0.46497	5.77788e-13	1.23199e-11
EEF1AKMT4	0.4981	0.00113173	0.020024			UBR7	0.467471	2.42e-19	5.89e-18			CPB1	-1.19358	3.35984e-13	8.49274e-12			MPI	-0.583235	5.79508e-13	1.23437e-11
PLEKHA1	-0.353807	0.00113799	0.0201128			TRAFD1	0.432289	2.51e-19	6.11e-18			LANCL1	-0.307118	3.62885e-13	9.16312e-12			PTK7	-0.417498	5.82022e-13	1.23842e-11
GAMT	-0.569066	0.00114563	0.0201951			CYB561	-0.478722	2.57e-19	6.26e-18			UACA	-0.470118	3.65791e-13	9.22686e-12			ZBTB47	-0.717205	5.8332e-13	1.23989e-11
AP4S1	-0.522134	0.00114623	0.0201951			CEP170	0.450331	2.58e-19	6.27e-18			GPRC5C	-0.41901	3.66945e-13	9.24633e-12			CMAS	0.374901	5.85648e-13	1.24354e-11
CEP85	0.261437	0.00114736	0.0201951			KIAA0232	0.414784	2.87e-19	6.98e-18			DOK5	-0.720006	3.68738e-13	9.2809e-12			GPN3	0.518273	5.88444e-13	1.24818e-11
SH2D7	-2.72639	0.00114842	1			NAA50	0.344049	2.88e-19	6.99e-18			FASTK	-0.530756	3.69085e-13	9.2809e-12			CDK5	-0.54484	5.92625e-13	1.25574e-11
LINC01297	0.419713	0.00114878	0.0201951			DRAP1	0.412029	3.07e-19	7.44e-18			LRFN1	-0.630151	3.74533e-13	9.40811e-12			TFIP11	0.50453	5.99545e-13	1.26908e-11
MCOLN3	-0.455996	0.00114888	0.0201951			TNKS	0.448178	3.19e-19	7.72e-18			EIF1	0.300635	3.76729e-13	9.45343e-12			HSD17B6	0.629898	6.01428e-13	1.27174e-11
HTATIP2	0.286951	0.00115096	0.0202098			IGFBP4	-0.365875	3.43e-19	8.29e-18			SS18L1	0.330925	3.8165e-13	9.56697e-12			CUX1	-0.414413	6.08373e-13	1.28509e-11
AHCYL1	0.233343	0.00115279	0.0202199			SLC10A3	0.431699	3.45e-19	8.35e-18			SCP2	-0.414049	3.83574e-13	9.60526e-12			GPR108	0.472661	6.11554e-13	1.29047e-11
ZSCAN25	-0.362292	0.0011541	0.020221			ANKRD50	0.51912	3.5e-19	8.45e-18			CENPJ	0.471266	4.04532e-13	1.01196e-11			PTPN14	0.31734	6.30933e-13	1.32907e-11
KDM4B	0.322674	0.00115661	0.0202432			METTL26	-0.634082	3.75e-19	9.03e-18			SCRN1	-0.319988	4.19272e-13	1.04775e-11			GNPDA1	0.346743	6.31152e-13	1.32907e-11
RAB15	-0.461071	0.00116017	0.0202835			HECTD1	0.364692	3.92e-19	9.44e-18			LIG3	0.396237	4.29424e-13	1.07201e-11			MGAT4A	0.492958	6.37957e-13	1.34202e-11
AQP6	-0.439302	0.00116188	0.0202916			SMARCD3	-0.564054	4.02e-19	9.68e-18			GBP2	0.575229	4.30731e-13	1.07416e-11			PLEKHM3	0.87734	6.49398e-13	1.36467e-11
AC017104.4	1.88277	0.00116291	1			MPZL3	0.804007	4.28e-19	1.03e-17			PLCD3	-0.396041	4.33367e-13	1.07962e-11			KIAA0232	0.395738	6.58846e-13	1.3831e-11
TRIP13	0.245621	0.00116998	0.0204111			LONP2	-0.464609	4.29e-19	1.03e-17			ASB9	-0.740455	4.40722e-13	1.09681e-11			PPP1R14B	-0.321136	6.66836e-13	1.39843e-11
MYEOV	1.13284	0.00117137	0.0204133			PRPSAP1	-0.622978	4.37e-19	1.05e-17			GPATCH11	0.573629	4.60963e-13	1.146e-11			KDM2A	0.32452	6.7175e-13	1.40729e-11
TUG1	-0.299883	0.0011787	0.0205145			DDRGK1	0.47622	4.38e-19	1.05e-17			VWA7	0.618707	4.65713e-13	1.15662e-11			RP2	0.539475	6.75791e-13	1.4143e-11
TCF7	0.667433	0.00117971	0.0205145			SAP130	0.396493	4.4e-19	1.05e-17			PKN1	-0.378236	4.73615e-13	1.17504e-11			AQP6	-0.948822	6.90842e-13	1.44431e-11
TAP1	0.274511	0.0011841	0.0205688			ATP13A2	-0.671137	4.73e-19	1.13e-17			ZBTB40	-0.352987	4.86401e-13	1.20553e-11			TNKS	0.477954	7.12237e-13	1.48752e-11
COASY	0.298873	0.00119124	0.0206708			OGDHL	-0.325413	5.09e-19	1.21e-17			DNMT1	0.301966	4.90126e-13	1.21333e-11			CRIP2	-0.43135	7.16059e-13	1.49356e-11
NKIRAS2	-0.325329	0.00119605	0.020732			BTRC	-0.559159	5.11e-19	1.22e-17			TFDP1	-0.310602	4.90556e-13	1.21333e-11			GRPEL1	0.391415	7.16599e-13	1.49356e-11
GPR132	-0.872981	0.00120473	0.0208602			MAGOH	0.435168	5.12e-19	1.22e-17			GJA1	4.5588	5.07931e-13	1.25503e-11			AC020916.1	0.410064	7.19209e-13	1.49747e-11
OSER1	0.253722	0.00120897	0.0209112			PIP5K1A	0.328379	5.15e-19	1.23e-17			SLC35E2B	-0.399503	5.43315e-13	1.34108e-11			PSMA4	0.377722	7.71272e-13	1.60423e-11
PSMC1P1	0.71436	0.00121375	0.0209714			KAZALD1	-0.43307	5.16e-19	1.23e-17			BRSK1	0.595958	5.53493e-13	1.36481e-11			NSFL1C	0.529031	7.81393e-13	1.62362e-11
NREP	-0.356601	0.00121715	0.0210078			AC007996.1	-0.756566	5.18e-19	1.23e-17			CD99	-0.468637	5.82401e-13	1.43463e-11			CCL28	-0.586637	7.86603e-13	1.63278e-11
GBA	0.307227	0.00122025	0.0210389			PAX8	-0.319301	5.2e-19	1.24e-17			CSPG5	-0.471477	5.85254e-13	1.44019e-11			ELL2	1.32622	7.91706e-13	1.6417e-11
TMEM25	-0.761436	0.00123425	0.0212577			AMOT	-0.601772	5.36e-19	1.27e-17			MTOR	0.30661	5.91517e-13	1.45412e-11			PLK3	0.632719	8.03001e-13	1.66343e-11
NEDD9	-0.242472	0.00123824	0.0212651			DNPEP	0.361461	5.4e-19	1.28e-17			PIP5K1A	0.306432	5.95522e-13	1.46248e-11			COX7A2L	-0.401657	8.04354e-13	1.66454e-11
PQLC2L	-0.441845	0.00123853	0.0212651			MDH1	-0.4057	5.45e-19	1.29e-17			AGO3	0.458022	6.06789e-13	1.48714e-11			DNAJC18	-0.722841	8.05362e-13	1.66493e-11
TUBA1A	-0.400436	0.00123862	0.0212651			GATAD2B	0.510714	5.58e-19	1.32e-17			ZNF32	-0.616223	6.07286e-13	1.48714e-11			NCK2	-0.81875	8.26924e-13	1.70777e-11
TIMM22	-0.494125	0.00124855	0.021413			PLK3	0.705411	5.67e-19	1.34e-17			AIMP1	-0.432909	6.07409e-13	1.48714e-11			GTPBP3	-0.669965	8.69952e-13	1.79481e-11
C2CD5	-0.387622	0.00125075	0.0214279			BCAM	-0.400289	5.87e-19	1.39e-17			HUS1	0.427696	6.15557e-13	1.50556e-11			SPON1	-0.263532	8.77951e-13	1.80949e-11
GPR39	-1.01977	0.00125614	0.0214977			AP3B2	0.508134	6.2e-19	1.46e-17			PTPRG	-0.390283	6.59732e-13	1.61197e-11			DYNC1LI1	0.441036	8.81289e-13	1.81453e-11
CSRNP2	-0.320015	0.00125753	0.0214988			PLEKHM3	0.972372	6.24e-19	1.47e-17			CGN	-0.449744	6.62451e-13	1.61698e-11			HECTD1	0.346042	8.90987e-13	1.83264e-11
NCOA3	-0.271272	0.00126067	0.0215071			EAF2	1.0955	7.28e-19	1.71e-17			PCNX2	-0.567051	6.72414e-13	1.63965e-11			OS9	0.354525	9.0097e-13	1.85131e-11
C8orf59	0.303309	0.00126067	0.0215071			NEK6	-0.634651	7.29e-19	1.71e-17			USP14	0.430668	6.85727e-13	1.67042e-11			SLC2A4RG	-0.429325	9.07394e-13	1.86263e-11
MIPEP	-0.426757	0.00126672	0.0215876			POLD2	-0.493758	7.36e-19	1.73e-17			DYNC1LI1	0.369116	6.97957e-13	1.6985e-11			ADCK2	-0.385625	9.22287e-13	1.89129e-11
AC124067.4	5.51826	0.00126831	1			PTAR1	0.497118	7.37e-19	1.73e-17			SAMD5	-1.0974	7.08828e-13	1.72322e-11			DLGAP1	0.928651	9.46926e-13	1.93986e-11
ATP13A4	1.45887	0.00127308	0.021649			KPNA2	0.3523	7.46e-19	1.75e-17			RAG2	3.47178	7.13306e-13	1.73237e-11			PLBD2	0.437465	9.61011e-13	1.96674e-11
MLLT11	0.425619	0.0012744	0.021649			BSDC1	0.387267	7.51e-19	1.76e-17			PATL1	0.393021	7.26045e-13	1.76153e-11			MORF4L2	0.300425	9.98046e-13	2.04048e-11
HSD17B7	0.307904	0.00127534	0.021649			PCK1	-0.384675	7.55e-19	1.76e-17			SNIP1	0.39838	7.54648e-13	1.82909e-11			NACC2	-0.610582	1.02001e-12	2.08329e-11
H3F3B	0.224667	0.00127576	0.021649			RLIM	0.379327	7.81e-19	1.83e-17			NDN	-0.493221	7.57315e-13	1.83372e-11			SUPT6H	0.366196	1.02624e-12	2.09391e-11
PSMB5	0.272865	0.00127701	0.021649			ASCC2	0.409962	7.86e-19	1.84e-17			FSCN1	-0.366213	7.60608e-13	1.83985e-11			ARHGAP23	-0.367161	1.09356e-12	2.22904e-11
RAE1	0.236635	0.00128206	0.0217119			CYB5R4	0.644142	7.87e-19	1.84e-17			SLC16A2	-0.63445	8.1235e-13	1.96304e-11			SLC15A2	0.745889	1.09806e-12	2.23597e-11
FZD7	0.374665	0.00128765	0.0217839			PVR	0.473	8.16e-19	1.9e-17			CUX1	-0.39033	8.14498e-13	1.96627e-11			ANO8	-0.885119	1.10214e-12	2.24204e-11
HMGCR	0.275125	0.00128913	0.0217862			CLTC	0.36962	8.44e-19	1.96e-17			DIRAS2	2.60352	8.417e-13	2.02991e-11			FAM3C	0.444388	1.14464e-12	2.32617e-11
GPR173	-0.36123	0.00129486	0.0218377			NR2F6	-0.462519	8.53e-19	1.98e-17			DDRGK1	0.427306	8.45377e-13	2.0361e-11			MRPS2	-0.650731	1.16173e-12	2.35856e-11
COL16A1	0.363018	0.00129491	0.0218377			ECPAS	0.336039	9.05e-19	2.1e-17			TENT5C	1.04609	8.45954e-13	2.0361e-11			SPRYD7	0.870823	1.20455e-12	2.44306e-11
POLR3K	0.385816	0.00129622	0.0218377			RPS6KC1	0.443401	9.4e-19	2.18e-17			PCMTD2	-0.400898	8.48827e-13	2.04099e-11			DDX24	0.357937	1.21394e-12	2.45789e-11
AP003175.1	5.54225	0.001308	1			CENPJ	0.576178	9.41e-19	2.18e-17			PITHD1	0.342278	8.59881e-13	2.06551e-11			RHBDD2	0.419384	1.21428e-12	2.45789e-11
HARS2	-0.258419	0.0013117	0.0220755			JMJD6	0.38092	9.46e-19	2.19e-17			VCPIP1	0.518909	8.67168e-13	2.08095e-11			MCOLN1	0.762769	1.2259e-12	2.47895e-11
LMO1	-0.419823	0.00131933	0.022181			LAP3	0.404809	9.86e-19	2.28e-17			CTSA	0.402148	9.17102e-13	2.19859e-11			GRIPAP1	0.344004	1.2274e-12	2.47953e-11
SLC39A6	0.275869	0.00133188	0.0223686			GSK3B	0.399184	1.01e-18	2.34e-17			ZBTB37	0.499718	9.39588e-13	2.25026e-11			ITPKC	0.486222	1.27067e-12	2.56438e-11
TMEM100	-0.447683	0.00133667	0.0224258			EI24	-0.570912	1.1e-18	2.54e-17			PPP2CA	0.307642	9.41639e-13	2.25294e-11			C9orf72	0.685176	1.35798e-12	2.73788e-11
QSOX1	0.281718	0.00134838	0.0225989			APOBEC3C	-0.539562	1.19e-18	2.74e-17			ZNF777	-0.544846	9.43902e-13	2.25612e-11			DDX21	0.335049	1.36021e-12	2.73965e-11
AGO2	0.27559	0.00136995	0.0229277			ALDH3B1	-0.692918	1.3e-18	2.99e-17			HEG1	0.40177	9.5323e-13	2.27617e-11			WWP1	0.473196	1.36285e-12	2.74227e-11
AL031729.1	1.03953	0.00137082	0.0229277			CTNNBIP1	-0.634644	1.31e-18	3.02e-17			HSP90B1	0.273818	9.72708e-13	2.32038e-11			AOX1	-0.844161	1.38739e-12	2.78889e-11
NOMO2	0.299048	0.00137235	0.0229296			BAIAP2-DT	-0.688891	1.36e-18	3.12e-17			CTTN	0.319424	1.11433e-12	2.65559e-11			NR4A3	0.960091	1.39513e-12	2.80168e-11
RILPL2	0.340264	0.00137697	0.0229831			KIF5B	0.340879	1.39e-18	3.19e-17			KLHL13	-0.355102	1.13391e-12	2.69959e-11			CTNNAL1	0.387081	1.40204e-12	2.81277e-11
DAGLA	-0.418408	0.00138035	0.0230158			NFAT5	0.599662	1.39e-18	3.19e-17			STRADB	-0.563555	1.15221e-12	2.74046e-11			UPK3B	-0.61562	1.41898e-12	2.84396e-11
HSPA1L	0.463911	0.00138681	0.0230997			FTSJ3	0.333006	1.4e-18	3.2e-17			JUN	0.35862	1.15615e-12	2.74714e-11			ZNF467	-0.788384	1.45303e-12	2.90935e-11
AC069224.1	-2.25734	0.00138893	1			AP2S1	-0.484006	1.45e-18	3.31e-17			ZNF185	0.359756	1.19256e-12	2.83086e-11			BACE1	-0.782089	1.47707e-12	2.95458e-11
CLUAP1	-0.568577	0.00139346	0.0231671			LSS	-0.361975	1.45e-18	3.31e-17			BOC	-0.431462	1.22151e-12	2.89675e-11			ASH1L	0.321781	1.51173e-12	3.02093e-11
CSRNP1	0.311609	0.00139378	0.0231671			MORC3	0.639165	1.46e-18	3.33e-17			LHX1-DT	-0.650582	1.25385e-12	2.97051e-11			AC009404.1	0.828103	1.52928e-12	3.05301e-11
CBWD6	0.430437	0.00139514	0.0231671			KLHL14	-0.400386	1.52e-18	3.48e-17			JMY	0.48521	1.26946e-12	3.00457e-11			DDX5	0.313762	1.53387e-12	3.05918e-11
AC099336.2	0.43705	0.00140386	0.023288			PITRM1	0.418731	1.62e-18	3.7e-17			NACC2	-0.545356	1.30631e-12	3.08876e-11			CPEB4	0.444811	1.54565e-12	3.07965e-11
SCN2B	-0.795404	0.00140992	0.0233221			HSP90B1	0.341169	1.73e-18	3.94e-17			SKA2	-0.478844	1.31755e-12	3.11227e-11			KIF1BP	-0.543179	1.58214e-12	3.14927e-11
APCDD1	-1.57874	0.00141068	0.0233221			ZNF467	-0.858171	1.75e-18	3.97e-17			GAN	0.627442	1.34797e-12	3.18103e-11			GPNMB	1.18908	1.59779e-12	3.17733e-11
AP1S1	0.247389	0.00141184	0.0233221			PEMT	-0.878689	1.75e-18	3.98e-17			POMP	0.375048	1.38865e-12	3.27383e-11			BYSL	0.440834	1.6349e-12	3.24795e-11
TMEM38A	-0.302957	0.00141289	0.0233221			BYSL	0.459073	1.75e-18	3.98e-17			AC009404.1	0.754968	1.3931e-12	3.28112e-11			GSK3B	0.399282	1.70109e-12	3.37616e-11
MEN1	-0.338239	0.00141311	0.0233221			C6orf223	-0.460965	1.87e-18	4.24e-17			KEAP1	0.345621	1.39717e-12	3.28751e-11			SMIM13	-0.618379	1.77641e-12	3.5222e-11
DDIT4	0.361213	0.00141829	0.0233837			TES	0.355626	1.94e-18	4.4e-17			BTBD6	-0.470261	1.40221e-12	3.29616e-11			IQGAP3	-0.41929	1.87822e-12	3.72044e-11
EPHX4	-0.338508	0.00142328	0.0234423			OLFML2A	-0.855809	1.97e-18	4.46e-17			PHYH	-0.412366	1.41979e-12	3.33422e-11			PHC3	0.444004	1.91103e-12	3.78175e-11
PHACTR4	-0.236544	0.00143001	0.0235291			GPRC5C	-0.445288	2e-18	4.52e-17			AHNAK	-0.3164	1.44096e-12	3.38067e-11			NDRG2	-0.934357	1.92642e-12	3.80852e-11
C2orf15	-0.487808	0.00143182	0.0235351			SKIV2L	0.336552	2.06e-18	4.65e-17			SUCLG2	-0.469705	1.44464e-12	3.38601e-11			PRPF6	0.314837	1.97238e-12	3.8956e-11
U2AF1L5	1.66978	0.00144798	0.0237766			SLC35F5	-0.356411	2.08e-18	4.7e-17			NTSR1	-0.730771	1.47319e-12	3.44957e-11			MAGOH	0.39536	2.00129e-12	3.94887e-11
TKFC	-0.372833	0.00145719	0.0239035			GRB2	0.287338	2.09e-18	4.71e-17			IPMK	0.506338	1.51793e-12	3.55089e-11			HOXA-AS2	-0.932294	2.01212e-12	3.96638e-11
LINC01447	-4.36695	0.00145772	1			SAMD1	-0.489659	2.18e-18	4.92e-17			MTA1	-0.371057	1.53061e-12	3.5771e-11			IVD	-0.446978	2.02556e-12	3.98901e-11
METTL13	0.260818	0.00146166	0.0239527			KCNC4	-1.05735	2.22e-18	5e-17			TMCO4	-0.565955	1.53712e-12	3.58884e-11			CERK	-0.377238	2.03293e-12	3.99967e-11
FAM241B	0.349949	0.00146436	0.0239726			ADPGK	0.499853	2.24e-18	5.05e-17			ADPGK	0.400085	1.54534e-12	3.60455e-11			NOMO1	0.464573	2.05583e-12	4.04081e-11
MRPL35	-0.291759	0.0014693	0.0240292			LARP4B	0.317365	2.38e-18	5.34e-17			PFN2	0.276663	1.5484e-12	3.6082e-11			H2AFJ	0.941188	2.07619e-12	4.0769e-11
ATG16L1	0.302687	0.00147324	0.0240599			GALNT2	0.346144	2.42e-18	5.44e-17			AASDHPPT	-0.469857	1.59203e-12	3.7063e-11			ABHD4	0.441763	2.11731e-12	4.15364e-11
ZCCHC2	0.331693	0.00147415	0.0240599			ATP2C1	0.310262	2.48e-18	5.56e-17			YIPF1	0.471471	1.61819e-12	3.76357e-11			CHMP7	0.357525	2.12667e-12	4.16798e-11
BAG3	0.315715	0.0014765	0.0240625			BPGM	0.434458	2.48e-18	5.57e-17			VASP	-0.497223	1.68816e-12	3.92254e-11			MAN2B1	0.351088	2.14769e-12	4.20513e-11
LINC00894	0.408943	0.00147727	0.0240625			RAB22A	0.35551	2.6e-18	5.82e-17			AFAP1	-0.365858	1.69141e-12	3.92631e-11			LINC00871	2.00646	2.1781e-12	4.26058e-11
EIF5A	0.295455	0.00149718	0.0243623			NCOA5	-0.600801	2.72e-18	6.09e-17			ARGLU1	-0.327186	1.71892e-12	3.98635e-11			ECPAS	0.317326	2.18174e-12	4.26361e-11
DENND5A	0.252121	0.00151085	0.0245601			TFDP1	-0.331998	2.75e-18	6.15e-17			BPGM	0.353889	1.82562e-12	4.22973e-11			PSMC6	0.368076	2.28534e-12	4.46178e-11
ADCYAP1R1	0.82595	0.00152357	0.024742			IVD	-0.497096	2.79e-18	6.23e-17			DHRS3	0.817218	1.84363e-12	4.26737e-11			SKA1	0.493587	2.32816e-12	4.54102e-11
TM7SF2	-0.323593	0.00152794	0.0247881			ATP1A1	0.247634	2.81e-18	6.27e-17			SH3RF1	-0.352236	1.91595e-12	4.43052e-11			RASL10B	-1.04733	2.34095e-12	4.56161e-11
ABRAXAS2	-0.329043	0.0015332	0.024835			IFITM1	0.502437	2.82e-18	6.29e-17			DLGAP1-AS1	0.607701	1.93484e-12	4.46991e-11			EFNB2	-0.409902	2.37197e-12	4.61764e-11
NUGGC	0.995419	0.00153389	0.024835			CTNNAL1	0.49351	2.85e-18	6.35e-17			CCDC117	-0.54126	1.96116e-12	4.52641e-11			PPM1K	0.594067	2.39094e-12	4.65012e-11
AC009404.1	0.475682	0.00153607	0.0248454			BCAS2	0.457708	2.85e-18	6.35e-17			PIP4P1	0.457247	1.98521e-12	4.57755e-11			C2CD5	-0.616863	2.40512e-12	4.67323e-11
PAFAH2	-0.31382	0.00154259	0.024926			TCEA2	-0.657514	2.92e-18	6.49e-17			GAS2L1	-0.609448	2.03654e-12	4.69142e-11			WNT10A	-0.927467	2.50569e-12	4.86401e-11
RBBP7	0.232342	0.00155824	0.0251389			HS6ST1	-0.479225	3.33e-18	7.39e-17			C6orf62	0.32198	2.05072e-12	4.71959e-11			ZNF605	-0.745672	2.55219e-12	4.94954e-11
SUCLG1	-0.254635	0.00155887	0.0251389			CLN8	0.598257	3.39e-18	7.51e-17			MDC1	0.362872	2.05585e-12	4.72688e-11			TIMM29	0.38615	2.5749e-12	4.98885e-11
PCDH17	1.07396	0.00156846	0.0252487			EFCAB12	1.80452	3.53e-18	7.83e-17			AC004835.1	3.75626	2.07482e-12	4.76597e-11			C1orf52	0.505125	2.5898e-12	5.01294e-11
RIN2	-0.268247	0.0015688	0.0252487			KRT15	0.851576	3.58e-18	7.93e-17			GHITM	0.266678	2.08047e-12	4.77255e-11			RCN3	0.468546	2.69894e-12	5.21923e-11
TGFB1	-0.441415	0.00157734	0.025361			GORASP1	-0.440602	3.74e-18	8.28e-17			LAP3	0.339636	2.08163e-12	4.77255e-11			CDR2	0.51435	2.72501e-12	5.26464e-11
DOCK8	-0.477144	0.00158016	0.0253811			GPRC5A	0.410811	3.76e-18	8.3e-17			DNAJC27	0.724192	2.10881e-12	4.82887e-11			NGDN	0.402834	2.76644e-12	5.33963e-11
DUSP12	-0.476202	0.00158215	0.025388			CALD1	-0.380622	3.81e-18	8.4e-17			MYLK	-0.340057	2.1102e-12	4.82887e-11			DPH5	-0.533442	2.77341e-12	5.34324e-11
BCAM	-0.37897	0.00158948	0.0254804			NR1D1	1.03262	3.86e-18	8.51e-17			DTX4	-0.708885	2.1239e-12	4.85563e-11			DOLPP1	0.617587	2.77356e-12	5.34324e-11
TCEA2	-0.351523	0.00159505	0.0255102			VANGL1	-0.512954	3.94e-18	8.67e-17			MAP4K4	-0.427248	2.30287e-12	5.25982e-11			KEAP1	0.368289	2.77732e-12	5.34543e-11
PRKAB2	-0.434473	0.00159597	0.0255102			AC009404.1	0.934644	3.99e-18	8.79e-17			IGHE	2.17051	2.3072e-12	5.26473e-11			ZNF460	1.39652	2.79129e-12	5.36723e-11
BTBD19	-0.430385	0.00159606	0.0255102			DMAC1	-0.550781	4.09e-18	9e-17			CRLS1	-0.477097	2.33928e-12	5.33291e-11			GTF2A1	0.534654	2.80616e-12	5.39075e-11
PPP1R16B	-1.07823	0.00160587	0.0256418			CRYL1	0.644162	4.24e-18	9.31e-17			HOMER3	-0.517884	2.35339e-12	5.36e-11			GPR173	-0.605627	2.81384e-12	5.39623e-11
MKS1	-0.548935	0.00162088	0.0258559			XAB2	0.443599	4.33e-18	9.5e-17			DOK6	-0.695155	2.36473e-12	5.38077e-11			SNCG	0.654182	2.81432e-12	5.39623e-11
CREG1	-0.246704	0.00162299	0.0258641			ADORA1	-0.969204	4.37e-18	9.59e-17			DCTN1	-0.33806	2.49734e-12	5.67716e-11			TMED3	0.33288	2.82472e-12	5.41107e-11
MT-RNR2	-0.224476	0.00162537	0.0258766			TNRC18	-0.511106	4.43e-18	9.7e-17			ZEB1	0.511845	2.54636e-12	5.78315e-11			IGFBP4	-0.343931	2.83444e-12	5.42459e-11
MELTF-AS1	-0.538581	0.00163128	0.0259451			INO80D	0.68089	4.58e-18	1e-16			ADRA2B	-0.640382	2.55411e-12	5.795e-11			PFN2	0.288154	2.86198e-12	5.47217e-11
CCDC28B	-0.397964	0.00163942	0.0260146			TFE3	0.372496	4.61e-18	1.01e-16			SNRNP48	0.489405	2.55637e-12	5.795e-11			ZNF862	-0.564673	2.86561e-12	5.47397e-11
RAB29	-0.283959	0.00164007	0.0260146			ATP11B	0.400381	4.64e-18	1.01e-16			KIFC3	-0.421806	2.58304e-12	5.84997e-11			SURF4	0.30296	2.87519e-12	5.48711e-11
P3H4	-0.744841	0.00164101	0.0260146			HJURP	0.505714	4.66e-18	1.02e-16			PNMA3	-0.677577	2.70131e-12	6.1121e-11			ZNF777	-0.574323	2.89143e-12	5.51294e-11
PROSER3	-0.332675	0.0016433	0.0260146			NIPA2	0.425736	4.99e-18	1.09e-16			ERN1	0.669179	2.7249e-12	6.15969e-11			ATP5F1D	-0.481824	2.89955e-12	5.52325e-11
KCNH7	-0.51964	0.00164367	0.0260146			CDC123	0.334906	5.07e-18	1.1e-16			CDC123	0.315759	2.77717e-12	6.27199e-11			AL161431.1	1.26782	2.95661e-12	5.62669e-11
GRPEL1	0.241515	0.00164556	0.0260192			HNRNPA1P48	-0.720535	5.36e-18	1.17e-16			VPS37D	-0.704844	2.8425e-12	6.41355e-11			B4GALT2	-0.429429	3.00378e-12	5.71112e-11
RABL2A	-0.377845	0.0016535	0.0260805			HPS5	0.491232	5.45e-18	1.19e-16			C3orf14	0.515676	2.86448e-12	6.45711e-11			FUBP3	0.343509	3.03461e-12	5.76435e-11
SULT1C2	-0.631024	0.00165371	0.0260805			ZNF37BP	-0.507269	5.46e-18	1.19e-16			ADCK2	-0.38239	2.86851e-12	6.46016e-11			MIA3	0.403246	3.04994e-12	5.78806e-11
AC010422.8	0.411315	0.00165427	0.0260805			SRP19	0.543786	5.55e-18	1.2e-16			MORF4L2	0.271893	2.8784e-12	6.4729e-11			PITHD1	0.357477	3.07776e-12	5.83543e-11
AL162458.1	-0.458721	0.00169251	0.0266574			CKB	-0.640054	5.68e-18	1.23e-16			PNP	0.441238	2.87952e-12	6.4729e-11			IKBKE	-0.768015	3.15156e-12	5.96978e-11
TPPP3	-1.08386	0.00170724	0.0268633			DDX3X	0.309081	5.69e-18	1.23e-16			UTP11	0.382679	2.88265e-12	6.47391e-11			MAP3K2	0.499956	3.18047e-12	6.01896e-11
MMP13	4.36743	0.0017074	1			DCUN1D3	0.721458	5.7e-18	1.23e-16			TCEA2	-0.591091	2.91066e-12	6.53073e-11			CD320	0.382899	3.30804e-12	6.2543e-11
RELN	-0.800555	0.00171209	0.0269135			SUSD2	-0.861332	5.72e-18	1.24e-16			GRIPAP1	0.374117	2.91718e-12	6.53532e-11			MRPL11	-0.431425	3.31098e-12	6.2543e-11
PLXNB1	-0.331461	0.00171943	0.0270027			POLR2L	-0.541415	5.78e-18	1.25e-16			MGAT4A	0.513302	2.92079e-12	6.53532e-11			DHCR24	-0.338739	3.36454e-12	6.34959e-11
LAMB1	-0.296633	0.00172773	0.0271068			IDI1	0.337993	5.81e-18	1.25e-16			BOLA3	-0.814812	2.92082e-12	6.53532e-11			HUS1	0.479398	3.45881e-12	6.52146e-11
TMEM242	-0.717834	0.00173189	0.0271457			ATP6V0E1	0.386483	6.04e-18	1.3e-16			MARCKS	-0.471878	3.01625e-12	6.74262e-11			ADAMTS5	-0.584913	3.50952e-12	6.61095e-11
TAGLN	-0.327297	0.00174217	0.0272806			SCYL2	0.386073	6.16e-18	1.33e-16			KIAA1211L	-0.643731	3.03112e-12	6.76959e-11			ANKRD50	0.456772	3.73248e-12	7.02445e-11
AC103563.2	-1.19911	0.0017442	0.027286			RIOK3	0.357009	6.17e-18	1.33e-16			KIAA1551	-0.425578	3.04959e-12	6.80457e-11			SNHG18	-0.605521	3.76407e-12	7.07736e-11
TNRC6C	0.26171	0.00175259	0.0273908			AC007923.1	2.1184	6.27e-18	1.35e-16			RTN4R	-1.00673	3.12719e-12	6.97128e-11			NFAT5	0.560748	3.84919e-12	7.23072e-11
RBM38	-0.362674	0.0017637	0.0275379			SLC38A2	0.321826	6.28e-18	1.35e-16			GSDMD	-0.462056	3.13835e-12	6.9871e-11			REEP5	-0.375154	3.96528e-12	7.44194e-11
CYFIP2	-0.26622	0.00176585	0.0275449			PSMF1	-0.384592	6.34e-18	1.36e-16			ANKRD2	0.472936	3.14007e-12	6.9871e-11			HSF2	0.479101	3.97164e-12	7.44701e-11
RPS27AP16	-0.291736	0.00177322	0.0276333			ATPAF1	-0.417103	6.36e-18	1.36e-16			C3orf58	0.422165	3.34373e-12	7.43342e-11			ALG13	0.426027	4.08172e-12	7.64638e-11
AL031123.1	1.94886	0.00178103	1			GLDC	-0.322465	6.59e-18	1.41e-16			AC025154.2	-0.897826	3.34688e-12	7.43359e-11			POLR3D	0.349501	4.16942e-12	7.80348e-11
LHX6	0.454203	0.00178921	0.0278556			GDI1	0.339561	6.6e-18	1.41e-16			FAH	0.481817	3.45767e-12	7.6726e-11			SSBP4	-0.579472	4.17575e-12	7.80816e-11
SORD	0.300342	0.00179647	0.0279419			LAMA3	0.300296	6.71e-18	1.44e-16			FAM210B	-0.422888	3.51356e-12	7.78752e-11			ZBTB37	0.457781	4.21465e-12	7.87367e-11
DRAP1	0.321493	0.00180556	0.0280562			EIF2S2	0.319824	7.03e-18	1.5e-16			FAM174A	0.46188	3.51591e-12	7.78752e-11			ZNF503	0.321281	4.32547e-12	8.07329e-11
HUNK	-0.39264	0.00181404	0.028147			MYLK	-0.379033	7.29e-18	1.56e-16			MARVELD1	-0.503024	3.6526e-12	8.07727e-11			C3orf14	0.611154	4.39124e-12	8.18854e-11
ANOS1	-0.303551	0.00181487	0.028147			NGDN	0.429563	7.54e-18	1.61e-16			NDUFA1	-0.417788	3.65341e-12	8.07727e-11			JAG1	0.492442	4.53177e-12	8.44285e-11
GAPDHP1	0.515447	0.00182303	0.0282466			SNX16	0.601384	7.78e-18	1.66e-16			PLEKHB1	-0.780821	3.74503e-12	8.27228e-11			KAT7	0.458205	4.74345e-12	8.82915e-11
CAPG	0.556161	0.00183691	0.0284212			CBL	0.394036	8.05e-18	1.71e-16			IL17RC	-0.564859	3.84392e-12	8.48295e-11			TTC12	-0.649035	4.80617e-12	8.93772e-11
POTEG	0.554282	0.00183781	0.0284212			RUSC2	0.617028	8.29e-18	1.76e-16			ZNF165	0.5236	4.01148e-12	8.84465e-11			UBXN7	0.366059	5.06811e-12	9.41624e-11
TMED4	0.231983	0.00185178	0.02861			GLRX3	0.322266	8.77e-18	1.86e-16			CYBRD1	-0.407121	4.13984e-12	9.11935e-11			CHPF2	0.385424	5.08678e-12	9.4423e-11
MGST1	0.396256	0.00185361	0.0286108			TLE3	0.535808	9.49e-18	2.01e-16			COL4A3	1.48244	4.17147e-12	9.18065e-11			ZDHHC1	-0.803212	5.10385e-12	9.46537e-11
RN7SL336P	5.47726	0.00185899	1			AHNAK2	-0.723066	9.77e-18	2.07e-16			SLC2A1	0.371388	4.20115e-12	9.23756e-11			MAP7D1	0.343868	5.38531e-12	9.97826e-11
MTF1	0.244699	0.00186053	0.0286863			MBD4	0.485155	9.84e-18	2.09e-16			BHLHE41	0.357872	4.23699e-12	9.3079e-11			PPP1CC	-0.350371	5.39943e-12	9.99533e-11
CTSB	-0.270773	0.00186376	0.0286863			JKAMP	0.485209	9.87e-18	2.09e-16			TMEM59L	-1.03682	4.3664e-12	9.57354e-11			TMEM147-AS1	-0.390477	5.4422e-12	1.00654e-10
TRERF1	-0.346067	0.00186422	0.0286863			CIZ1	-0.563726	1.04e-17	2.21e-16			MPV17L2	0.498107	4.36905e-12	9.57354e-11			IGHE	2.39519	5.59491e-12	1.03384e-10
CLCN6	0.270483	0.00186558	0.0286863			YWHAB	0.270997	1.11e-17	2.35e-16			PPP1CC	-0.370395	4.3698e-12	9.57354e-11			ABHD17B	0.542788	5.6516e-12	1.04337e-10
WFDC6	5.44085	0.0018678	1			PCMTD2	-0.402502	1.13e-17	2.38e-16			ZNF37BP	-0.518515	4.43561e-12	9.70892e-11			BSDC1	0.324639	5.83547e-12	1.07634e-10
FBXW8	-0.396408	0.00188252	0.0289195			CELF1	0.294706	1.15e-17	2.43e-16			C9orf72	0.548252	4.47198e-12	9.77967e-11			LARP1	0.303817	6.0272e-12	1.1107e-10
ZNF658	-0.598952	0.00188763	0.028945			MIA3	0.406642	1.19e-17	2.51e-16			MPI	-0.469234	4.6484e-12	1.01563e-10			EIF2B1	0.366078	6.28079e-12	1.15638e-10
POLR2F	0.301604	0.00188776	0.028945			GTF2I	-0.483903	1.23e-17	2.59e-16			PLK3	0.537021	4.67034e-12	1.0195e-10			SELENON	-0.503527	6.37319e-12	1.17233e-10
MANF	0.242237	0.00189755	0.0290376			APBA2	-0.662614	1.25e-17	2.63e-16			RANGAP1	-0.404032	4.76907e-12	1.04011e-10			CFAP97	-0.437415	6.37911e-12	1.17236e-10
BTG2	0.275587	0.00189855	0.0290376			MTX3	0.490789	1.25e-17	2.63e-16			ATP6AP1	0.345138	4.83497e-12	1.05354e-10			MEGF8	-0.415553	6.43277e-12	1.18116e-10
BCL9	0.275162	0.00189917	0.0290376			PIK3CA	0.428054	1.31e-17	2.76e-16			NUP85	-0.348577	4.85232e-12	1.05636e-10			SELENOF	-0.402661	6.57707e-12	1.20657e-10
AKAP12	-0.253453	0.00190449	0.0290915			SCRN1	-0.334293	1.33e-17	2.8e-16			ROM1	0.690302	4.88964e-12	1.06353e-10			SCG3	1.22551	6.61272e-12	1.21202e-10
FARP1	-0.25068	0.00190929	0.0291374			ADAMTS4	1.02982	1.47e-17	3.07e-16			MDM4	0.484541	4.97772e-12	1.08171e-10			MUT	0.360517	6.63996e-12	1.21591e-10
REEP2	-0.384146	0.00191297	0.0291661			PMVK	-0.513825	1.48e-17	3.11e-16			SELENOF	-0.334959	5.01467e-12	1.08877e-10			EIF2AK3	0.545433	6.96516e-12	1.27432e-10
FMN2	-5.41965	0.00192103	1			DOLPP1	0.679335	1.49e-17	3.12e-16			ARV1	-0.392238	5.07925e-12	1.1018e-10			PHF8	0.36697	7.02171e-12	1.28351e-10
TSPAN7	0.540977	0.00192428	0.0292667			SNHG7	-0.550047	1.56e-17	3.26e-16			MED13	0.437595	5.09874e-12	1.10503e-10			LRFN1	-0.573087	7.07595e-12	1.29227e-10
WDR62	0.333912	0.00192459	0.0292667			M6PR	0.351997	1.63e-17	3.4e-16			LGMN	0.387433	5.14758e-12	1.11462e-10			IARS	0.330258	7.08499e-12	1.29276e-10
RRP12	0.291721	0.00192499	0.0292667			H2AFY2	-0.566835	1.63e-17	3.4e-16			YPEL2	-0.518821	5.17035e-12	1.11854e-10			AVPI1	0.465205	7.13419e-12	1.30057e-10
PELI2	-0.358398	0.00193804	0.029419			BCKDK	-0.626511	1.63e-17	3.41e-16			MRPL11	-0.402252	5.21133e-12	1.1264e-10			ETF1	0.291304	7.35521e-12	1.33852e-10
DDX11-AS1	0.89691	0.00193864	0.029419			GTPBP3	-0.745017	1.64e-17	3.42e-16			ZMYND11	-0.370707	5.25847e-12	1.13557e-10			ZBED5	-0.498774	7.35551e-12	1.33852e-10
ERBB2	-0.342049	0.00194619	0.029506			CRY1	0.619067	1.73e-17	3.61e-16			ADD3	-0.45018	5.32281e-12	1.14844e-10			CSDC2	-1.06238	7.37016e-12	1.33999e-10
ENTPD8	-1.53838	0.00195344	1			UTP11	0.434738	1.95e-17	4.05e-16			GOLGA4	0.426495	5.37925e-12	1.15959e-10			DFFA	-0.334986	7.45608e-12	1.3544e-10
CCDC136	-0.351077	0.00195415	0.029599			RAB34	-0.385667	1.96e-17	4.07e-16			UBXN7	0.376872	5.50048e-12	1.18466e-10			HOMER3	-0.496418	7.48673e-12	1.35875e-10
PSORS1C1	-0.621446	0.00195863	0.029628			VPS53	0.484674	1.99e-17	4.13e-16			FTSJ3	0.320156	5.59848e-12	1.2047e-10			YKT6	0.326322	7.53566e-12	1.36642e-10
TANC2	-0.365069	0.00195972	0.029628			JUN	0.418573	2.02e-17	4.18e-16			CAMK1D	-0.53071	5.64678e-12	1.21401e-10			CTDSP1	-0.440115	7.62184e-12	1.38081e-10
OTUD3	0.328978	0.00198224	0.0299155			HSPA4L	0.49105	2.02e-17	4.19e-16			HJURP	0.402119	5.72138e-12	1.22895e-10			ARRDC4	0.559819	7.69929e-12	1.39309e-10
ACSS3	-0.304789	0.00198243	0.0299155			ZMPSTE24	0.372351	2.18e-17	4.52e-16			ETS2	0.371761	5.7692e-12	1.23812e-10			CYB561	-0.40081	7.70326e-12	1.39309e-10
MUM1L1	1.04867	0.00198824	0.0299752			ZDHHC8	-0.846162	2.21e-17	4.57e-16			CEP170	0.379012	5.83589e-12	1.25132e-10			TMEM248	0.291503	7.86415e-12	1.42092e-10
AL031123.3	0.638732	0.0019934	0.0300251			GPC1	-0.545203	2.3e-17	4.76e-16			QRICH2	-0.854643	5.84429e-12	1.25202e-10			MVB12B	-0.879179	7.92429e-12	1.43052e-10
ZNF366	4.91362	0.00199404	1			APH1A	-0.283804	2.31e-17	4.78e-16			RIOK1	0.349659	5.94275e-12	1.27198e-10			GYG2	-1.06686	8.11306e-12	1.4633e-10
GALNT2	0.267173	0.00200078	0.0301083			SNRNP25	0.423322	2.4e-17	4.95e-16			WNT10A	-0.801588	6.10047e-12	1.30458e-10			IER3	0.496036	8.14239e-12	1.4665e-10
NFKB2	0.297357	0.00200402	0.0301292			UHMK1	0.36378	2.48e-17	5.11e-16			EDEM2	0.358067	6.20671e-12	1.32613e-10			PRRG2	0.622108	8.14719e-12	1.4665e-10
FICD	0.441631	0.00200596	0.0301304			ALKBH6	0.731831	2.49e-17	5.13e-16			ZNF302	-0.383022	6.43729e-12	1.37418e-10			CYTH2	0.390832	8.15244e-12	1.4665e-10
SCG3	0.613226	0.00201736	0.0302371			DUS1L	-0.452047	2.6e-17	5.34e-16			PVR	0.430053	6.49271e-12	1.38479e-10			SLC25A44	0.360572	8.16135e-12	1.46681e-10
KCNQ1	-0.541447	0.00201932	0.0302371			PIGA	0.633572	2.73e-17	5.62e-16			NCOA5	-0.455403	6.58532e-12	1.4033e-10			SAP18	0.305109	8.3118e-12	1.49253e-10
LINC00173	-0.467837	0.00201993	0.0302371			TMEM161A	0.39052	2.77e-17	5.68e-16			WASF1	-0.497759	6.59927e-12	1.40503e-10			TTBK2	0.593019	8.3642e-12	1.50062e-10
LRP2BP	0.590732	0.00202053	0.0302371			DNTTIP1	0.404028	2.8e-17	5.75e-16			DCTN4	0.323665	6.72138e-12	1.42977e-10			KDM1B	0.444421	8.45614e-12	1.51523e-10
TIGD1	0.476287	0.00202745	0.0303113			DSTYK	-0.534246	2.83e-17	5.8e-16			PCLAF	-0.521795	6.77685e-12	1.4403e-10			PLD3	0.36314	8.46054e-12	1.51523e-10
LYPD6	0.300836	0.00203068	0.0303113			ZNF37A	-0.597105	2.83e-17	5.8e-16			ALG13	0.34407	6.79476e-12	1.44284e-10			PKN1	-0.312511	8.54082e-12	1.52827e-10
FAT1	-0.300958	0.00203111	0.0303113			C1S	0.362646	2.84e-17	5.81e-16			DNAJB5	0.472192	6.95471e-12	1.47551e-10			DNTTIP1	0.396663	8.5597e-12	1.5303e-10
STX1B	-0.606651	0.00203685	0.0303691			CDR2	0.544599	2.94e-17	6.01e-16			DNAH3	2.48441	7.00904e-12	1.48573e-10			KPNA2	0.302411	8.5996e-12	1.53609e-10
ZBTB39	-0.484222	0.0020389	0.0303717			PSMA7	0.330878	3.33e-17	6.8e-16			EIF2S3	-0.292582	7.05907e-12	1.49503e-10			ATAD2	0.33715	8.88808e-12	1.58622e-10
CELSR3	0.337686	0.00206536	0.0307377			NIN	-0.542034	3.5e-17	7.15e-16			TBCK	-0.477656	7.09277e-12	1.50085e-10			CACNB3	-0.518636	9.07975e-12	1.61901e-10
MCTP1	-0.450649	0.00207432	0.0308426			CXorf40B	0.505002	3.57e-17	7.28e-16			GRB10	0.63345	7.40926e-12	1.56645e-10			TUBB2A	0.718378	9.09718e-12	1.6207e-10
SECISBP2	0.242929	0.00207926	0.0308879			DPH5	-0.544727	3.89e-17	7.93e-16			GJA3	-0.607147	7.44853e-12	1.57337e-10			EIF2S3	-0.276844	9.28469e-12	1.65139e-10
DNAJB5	0.328867	0.00208777	0.0309664			NOC2L	0.289615	3.91e-17	7.96e-16			RAB7A	0.268669	7.71856e-12	1.62899e-10			CTSH	-0.68983	9.28567e-12	1.65139e-10
ETV4	-0.48555	0.00208837	0.0309664			BEX3	-0.332155	3.93e-17	7.99e-16			MGRN1	-0.443942	7.80547e-12	1.64419e-10			MYO1D	0.574898	9.3e-12	1.65249e-10
TMCC2	-0.977592	0.00209214	0.0309939			SOCS3	0.483344	3.93e-17	8e-16			SENP5	0.351761	7.80614e-12	1.64419e-10			IRF6	0.352472	9.34848e-12	1.65966e-10
SELENOF	-0.312767	0.00210795	0.0311996			PTMS	-0.460673	3.98e-17	8.08e-16			CYB561	-0.39589	7.81102e-12	1.64419e-10			NOC2L	0.306383	9.5244e-12	1.68942e-10
AC073174.1	-0.927529	0.0021198	0.0313463			ING1	0.417549	4.15e-17	8.42e-16			SKA1	0.415811	7.84532e-12	1.64998e-10			SULF1	-0.370371	9.75486e-12	1.72879e-10
PRAG1	-0.743951	0.00212617	0.0314119			ZNF850	0.674804	4.52e-17	9.16e-16			SFXN3	-0.517878	7.93605e-12	1.66752e-10			ALKBH6	0.606151	1.07516e-11	1.90378e-10
CCDC106	-0.461277	0.00213057	0.0314482			CSRP1	-0.451006	4.72e-17	9.56e-16			BSDC1	0.346168	7.94252e-12	1.66752e-10			WASHC2A	0.303731	1.07683e-11	1.90508e-10
FLT4	-0.934723	0.00213326	0.0314593			CKS2	0.296553	4.81e-17	9.73e-16			HSD17B11	-0.480507	7.98098e-12	1.67413e-10			DHRS3	0.854543	1.08419e-11	1.91644e-10
SPAG9	0.248784	0.00213623	0.0314744			ITM2C	-0.33985	4.84e-17	9.78e-16			TAF13	0.433526	8.09529e-12	1.69664e-10			MRPL35	-0.514998	1.09012e-11	1.92524e-10
SPRED3	0.419044	0.00214035	0.0314941			HOMER3	-0.506976	4.9e-17	9.9e-16			USP2	0.709519	8.32815e-12	1.74393e-10			TBCB	0.339972	1.11703e-11	1.97107e-10
HSPB7	-1.41092	0.00214145	0.0314941			ATP2B4	-0.466956	4.97e-17	1e-15			RBMX	-0.340107	8.33963e-12	1.74482e-10			GARS	0.4129	1.17455e-11	2.07077e-10
PPM1K	0.384435	0.00214751	0.0315345			CISD3	-0.633774	5.03e-17	1.02e-15			SMYD2	-0.402767	8.4374e-12	1.76375e-10			DUXAP8	-0.478079	1.19352e-11	2.10239e-10
ZNF354C	-0.453471	0.00214809	0.0315345			CRTC1	-0.382831	5.11e-17	1.03e-15			PIANP	-0.645044	8.62637e-12	1.8017e-10			CRELD2	0.416297	1.21352e-11	2.13578e-10
RHOXF1-AS1	1.64194	0.0021652	1			AHCYL2	0.411504	5.34e-17	1.07e-15			HMG20A	-0.491396	8.81605e-12	1.83972e-10			FAF2	0.278764	1.25444e-11	2.20589e-10
GPR85	0.753856	0.00217437	0.0318914			THEM6	-0.506218	5.64e-17	1.14e-15			TMEM130	-1.66196	8.91974e-12	1.85975e-10			PPP1R26-AS1	-1.05515	1.28106e-11	2.24891e-10
ARL17B	0.730334	0.00222029	0.0325355			CTSD	0.460762	5.67e-17	1.14e-15			BCL7C	-0.553849	8.97055e-12	1.86867e-10			RTN4	0.380902	1.28112e-11	2.24891e-10
PCBD2	-0.393228	0.00222277	0.0325379			CPEB3	0.830068	5.98e-17	1.2e-15			TRMT1	0.354482	8.97795e-12	1.86867e-10			GPATCH11	0.595415	1.30541e-11	2.28958e-10
PCED1B	-1.23612	0.00222447	0.0325379			MICU2	0.390183	5.98e-17	1.2e-15			ACSS1	-1.01215	9.00396e-12	1.87247e-10			ASCC2	0.401315	1.32915e-11	2.32921e-10
PPM1M	-0.547564	0.00222758	0.0325456			MLF2	0.271241	6.07e-17	1.22e-15			EIF2AK3	0.486052	9.18505e-12	1.90848e-10			CUEDC2	-0.444093	1.38297e-11	2.42145e-10
IKBKE	-0.508555	0.00222901	0.0325456			HPS6	-0.543713	6.18e-17	1.24e-15			TIMM21	-0.454957	9.34446e-12	1.93994e-10			PSMA7	0.322008	1.39751e-11	2.44481e-10
FLNC	-0.397766	0.00223311	0.0325651			GRPEL1	0.393998	6.55e-17	1.31e-15			RAB5A	0.443173	9.36402e-12	1.94233e-10			RANGAP1	-0.420262	1.41397e-11	2.47148e-10
AOC3	0.511599	0.00223437	0.0325651			CGN	-0.616268	6.56e-17	1.31e-15			MYL12A	0.343742	9.50451e-12	1.96978e-10			CDK12	0.338077	1.44129e-11	2.51707e-10
RINT1	-0.299558	0.00224534	0.0326711			SOGA1	-0.388532	6.59e-17	1.32e-15			ZNF611	0.646313	9.52534e-12	1.97241e-10			CKAP4	-0.438237	1.4718e-11	2.56815e-10
POLRMTP1	0.564556	0.00224567	0.0326711			ERLIN2	0.380781	6.74e-17	1.34e-15			SWI5	0.500744	9.54415e-12	1.97461e-10			PROS1	0.468992	1.47554e-11	2.57247e-10
DBP	-0.406859	0.00225083	0.0327168			PALD1	-0.514547	6.83e-17	1.36e-15			STEAP3	-1.03654	9.60193e-12	1.98487e-10			SPRED3	0.774679	1.51435e-11	2.63787e-10
LARGE2	0.332702	0.00226224	0.0328249			KCNH3	-0.758578	6.9e-17	1.37e-15			CDHR5	0.674748	9.66351e-12	1.99589e-10			KAT5	0.493976	1.5225e-11	2.6498e-10
BICC1	-0.401433	0.00226232	0.0328249			CDK12	0.378308	6.92e-17	1.38e-15			CHMP5	0.287511	9.79871e-12	2.02208e-10			GPR107	0.332609	1.70722e-11	2.96876e-10
ABCB6	0.485014	0.0022733	0.0329547			IQSEC1	-0.61342	6.98e-17	1.39e-15			AC005336.1	0.840644	9.87135e-12	2.03533e-10			CLPTM1L	0.291649	1.73679e-11	3.01759e-10
LRP8	0.249268	0.00228832	0.0331428			TMEM223	-0.524162	7.12e-17	1.41e-15			ACTR10	-0.458404	9.99712e-12	2.05923e-10			SLC25A16	0.554968	1.76914e-11	3.07118e-10
LINC01460	-0.986502	0.00230998	0.0334059			LMNA	0.303598	7.18e-17	1.43e-15			RNF170	-0.592875	1.00043e-11	2.05923e-10			CTSS	0.466832	1.79746e-11	3.11769e-10
TNRC18	-0.357132	0.00231061	0.0334059			ATP1B3	0.429692	7.25e-17	1.44e-15			PPIL1	-0.39845	1.01859e-11	2.09483e-10			DNAJC6	0.492168	1.83332e-11	3.17718e-10
GKAP1	-0.380712	0.00231457	0.0334334			RBP1	-0.390328	7.97e-17	1.58e-15			ARHGAP45	0.485383	1.03462e-11	2.12599e-10			ZNRF1	-0.412045	1.84351e-11	3.19212e-10
GAB1	-0.483814	0.00232032	0.0334866			SDF4	0.309182	8.44e-17	1.67e-15			PSMA3	0.350484	1.03855e-11	2.13226e-10			RPS24	-0.272065	1.8691e-11	3.23368e-10
VPS37D	-0.366577	0.00232372	0.0335058			EPS8L1	-0.489269	8.74e-17	1.73e-15			KIF1BP	-0.484113	1.05184e-11	2.15771e-10			ASB9	-0.804202	1.88274e-11	3.25453e-10
HSD17B8	-0.685723	0.00233553	0.0336461			GRIPAP1	0.343952	8.82e-17	1.74e-15			GNPDA1	0.296358	1.08154e-11	2.21674e-10			SLC52A2	0.389362	1.89945e-11	3.28062e-10
KCNC4	-0.466133	0.00234074	0.0336913			TRMT1	0.352893	9.09e-17	1.8e-15			FNDC3B	0.361635	1.08921e-11	2.23058e-10			OSER1-DT	0.629618	1.99348e-11	3.4401e-10
ERRFI1	0.328516	0.00234617	0.0337159			ZNF611	0.724715	9.41e-17	1.86e-15			DFFA	-0.341245	1.11733e-11	2.28622e-10			VPS50	-0.469205	2.07135e-11	3.57146e-10
UNC93B1	-0.388041	0.00234661	0.0337159			MASTL	0.454402	9.56e-17	1.88e-15			PPP1R26-AS1	-0.913717	1.12663e-11	2.3033e-10			TUT7	0.459269	2.12882e-11	3.66744e-10
PMAIP1	0.351468	0.00234897	0.0337199			ARHGAP45	0.5044	9.66e-17	1.9e-15			POP4	0.380993	1.14257e-11	2.33391e-10			AL590560.1	-1.2317	2.14106e-11	3.68542e-10
PKN3	-0.52669	0.00236012	0.0338335			PIP4K2B	-0.351157	9.73e-17	1.92e-15			ASCC2	0.403448	1.14916e-11	2.34538e-10			S100A1	-0.57008	2.14651e-11	3.69167e-10
TGIF1	0.307034	0.00236106	0.0338335			JUP	-0.35683	9.76e-17	1.92e-15			VSIG10	-0.72572	1.19981e-11	2.4467e-10			TGOLN2	0.296561	2.19461e-11	3.77122e-10
SCARF2	-0.548152	0.00237072	0.0339419			KLHL35	-0.582538	9.81e-17	1.93e-15			VPS51	-0.444269	1.21697e-11	2.4796e-10			ORC6	0.344648	2.2128e-11	3.79926e-10
LRRC3	0.585558	0.00237547	0.0339799			NEDD4L	0.424295	9.92e-17	1.95e-15			ZBTB42	-0.697301	1.2422e-11	2.52888e-10			ZNF623	-0.488451	2.22423e-11	3.81567e-10
PLD6	0.53199	0.00238191	0.034042			IQCG	0.757389	9.95e-17	1.95e-15			KAT7	0.402788	1.26344e-11	2.56995e-10			WASF1	-0.49044	2.26098e-11	3.87544e-10
FAM177A1	0.27635	0.00238595	0.0340697			TDO2	3.0081	1e-16	1.96e-15			ECPAS	0.310561	1.26673e-11	2.57448e-10			FILIP1	0.667602	2.32571e-11	3.98304e-10
H2AFY2	-0.279549	0.00239209	0.034087			SNHG18	-0.67894	1e-16	1.96e-15			FBXW4	-0.383716	1.27062e-11	2.58021e-10			STRAP	0.305602	2.43715e-11	4.1704e-10
AL589987.1	0.508571	0.00239438	0.034087			2025-09-09	-0.341337	1.02e-16	1.99e-15			LARP4B	0.311458	1.27249e-11	2.58185e-10			ATP6V1E1	0.421891	2.51186e-11	4.29463e-10
PRCP	-0.238009	0.00239441	0.034087			PYROXD1	0.466359	1.05e-16	2.06e-15			INHBE	0.914436	1.27988e-11	2.59466e-10			GPATCH3	0.587115	2.57988e-11	4.40723e-10
AC114956.1	-1.42108	0.00239557	0.034087			EPCAM	0.421892	1.07e-16	2.09e-15			BACH1	0.454555	1.28256e-11	2.59791e-10			FZD4	-0.478219	2.59781e-11	4.43413e-10
CTNS	-0.354399	0.00239799	0.0340914			TMEM147-AS1	-0.416033	1.1e-16	2.14e-15			CASTOR2	0.697134	1.29961e-11	2.63025e-10			ORC1	0.408629	2.61265e-11	4.45573e-10
OPN1SW	0.461719	0.0024024	0.0341242			HADHA	-0.332086	1.18e-16	2.31e-15			RAB11FIP3	-0.414035	1.30916e-11	2.64734e-10			ZNF383	-0.562475	2.66767e-11	4.54576e-10
LAP3	0.232486	0.00242278	0.0343835			SNAPIN	-0.633594	1.22e-16	2.38e-15			RAPGEF3	-0.375158	1.32724e-11	2.68166e-10			SSSCA1	0.504697	2.67133e-11	4.54819e-10
AC089998.1	-2.91005	0.00243648	1			DBP	-0.887588	1.23e-16	2.4e-15			APOBEC3C	-0.447174	1.33369e-11	2.69245e-10			ATPAF1	-0.381257	2.70502e-11	4.60169e-10
WARS	0.237447	0.00243863	0.0345782			PTEN	-0.354614	1.26e-16	2.45e-15			RPS26	-0.350759	1.34024e-11	2.7034e-10			PRKDC	0.262079	2.72528e-11	4.6323e-10
SLFN5	-0.355155	0.00244522	0.0346413			UTP6	0.420502	1.28e-16	2.49e-15			KANK2	-0.434071	1.34802e-11	2.71683e-10			TNFSF10	-0.867013	2.75714e-11	4.68255e-10
PFKFB3	0.294596	0.00245086	0.0346909			MAU2	-0.340529	1.29e-16	2.5e-15			LIN7A	-0.634074	1.35663e-11	2.73191e-10			CPNE2	-0.86775	2.82708e-11	4.79732e-10
AC111188.1	-1.62967	0.00245797	1			KLHDC10	0.33935	1.38e-16	2.67e-15			HLA-C	0.40516	1.38041e-11	2.77749e-10			AKTIP	0.542351	2.92754e-11	4.96365e-10
FAM167A	-3.14095	0.00245935	1			DYNLT3	0.513985	1.42e-16	2.75e-15			WASHC2A	0.29498	1.40032e-11	2.8152e-10			TRIP13	0.309565	2.93971e-11	4.98015e-10
MISP3	-0.759693	0.00246028	0.0347938			IPO8	-0.405788	1.44e-16	2.79e-15			BACE1	-0.550937	1.43759e-11	2.88773e-10			FBXO38	0.363349	2.96753e-11	5.0231e-10
PSMA5	0.221872	0.00246439	0.0348216			INTS4	0.400014	1.44e-16	2.79e-15			CDR2	0.431143	1.44118e-11	2.89253e-10			DST	0.767358	2.98213e-11	5.04361e-10
TXN	0.230248	0.00248141	0.0350197			TWISTNB	0.542488	1.45e-16	2.8e-15			ITPR1	0.996348	1.44983e-11	2.90748e-10			PCNX2	-0.598041	2.98684e-11	5.0474e-10
CARD19	0.312732	0.00248273	0.0350197			CALB1	0.436375	1.49e-16	2.88e-15			HIST1H1C	0.935961	1.46864e-11	2.94277e-10			DNPEP	0.371433	3.04309e-11	5.13818e-10
RNF187	-0.33901	0.00248956	0.0350855			NDUFA4	-0.335224	1.51e-16	2.92e-15			B4GALT6	-0.792002	1.4724e-11	2.94786e-10			TAF9B	-0.353657	3.17917e-11	5.3635e-10
WWC1	-0.256364	0.00249905	0.0351886			ROM1	0.809311	1.52e-16	2.93e-15			LONP2	-0.371656	1.48855e-11	2.97772e-10			PIGA	0.544341	3.20514e-11	5.40283e-10
SORT1	0.245381	0.00251217	0.0353351			SNHG4	-0.363561	1.52e-16	2.94e-15			ADCYAP1R1	-2.36723	1.51134e-11	3.02047e-10			CEP170	0.447544	3.2704e-11	5.50829e-10
FLOT1	-0.268689	0.00251381	0.0353351			PLBD2	0.393855	1.55e-16	2.99e-15			NEK6	-0.481811	1.51242e-11	3.02047e-10			SS18L1	0.331884	3.28084e-11	5.51724e-10
NSMCE4A	-0.283572	0.00251928	0.0353812			IQGAP3	-0.38294	1.7e-16	3.27e-15			DNAJC19	-0.347316	1.61351e-11	3.21969e-10			TPST1	0.454946	3.28114e-11	5.51724e-10
ZNF331	0.236994	0.00252368	0.0354123			ESPN	-0.764253	1.71e-16	3.3e-15			DRAM2	-0.449398	1.61592e-11	3.22185e-10			ADORA1	-0.878251	3.28447e-11	5.51829e-10
ZNF556	0.42738	0.00253111	0.0354858			ITGAV	0.317119	1.73e-16	3.33e-15			FXYD7	-1.43396	1.64291e-11	3.27166e-10			UBXN4	0.420815	3.35956e-11	5.6398e-10
BEND7	-0.378741	0.00254156	0.0356016			PATL1	0.390972	1.85e-16	3.55e-15			PLXNB1	-0.366708	1.64362e-11	3.27166e-10			MAP4K4	-0.469039	3.3796e-11	5.66876e-10
ABHD3	0.564589	0.00254546	0.0356254			FBRS	0.381696	1.86e-16	3.56e-15			BIVM	-0.476178	1.67306e-11	3.32753e-10			MPV17L2	0.503269	3.54565e-11	5.9424e-10
IARS	0.235075	0.00255122	0.0356753			VTI1B	-0.642975	1.86e-16	3.56e-15			PRDM9	2.90637	1.70537e-11	3.38725e-10			DENND2C	0.792106	3.61512e-11	6.05385e-10
CXCL14	-3.34987	0.00258588	1			MCOLN1	0.742767	1.95e-16	3.74e-15			GEMIN8P4	0.686546	1.70589e-11	3.38725e-10			GMEB1	0.473135	3.71598e-11	6.21763e-10
UBB	0.287177	0.00258787	0.0361565			TNKS2	0.324876	1.99e-16	3.82e-15			SCNM1	0.374856	1.71092e-11	3.39446e-10			SSX1	2.74503	3.73722e-11	6.24803e-10
TALDO1	0.242542	0.00259142	0.0361592			PKD1	-0.325805	2.05e-16	3.93e-15			EFCAB12	1.41971	1.72054e-11	3.41074e-10			PCMT1	0.339271	3.75593e-11	6.27416e-10
ANKZF1	0.265179	0.00259252	0.0361592			CDH6	-0.28698	2.07e-16	3.95e-15			RUSC2	0.540461	1.72205e-11	3.41092e-10			CGN	-0.487457	3.7634e-11	6.28149e-10
WIPI1	0.360376	0.00260035	0.0362371			STXBP4	0.71287	2.11e-16	4.03e-15			NDP	7.1494	1.72574e-11	3.41544e-10			ATG16L1	0.445908	3.7975e-11	6.3332e-10
SLX4IP	-0.570777	0.00263433	0.0366584			C3orf14	0.684238	2.2e-16	4.21e-15			UBQLN2	0.356767	1.75676e-11	3.47398e-10			SLC35E2B	-0.441149	3.97237e-11	6.61943e-10
CKS2	0.230108	0.00263509	0.0366584			CACNB3	-0.56207	2.21e-16	4.21e-15			PPP3CB	-0.404064	1.78117e-11	3.51938e-10			RABL2A	-0.699194	3.98791e-11	6.63989e-10
ZNF608	-0.252202	0.00263973	0.0366616			AL451060.1	2.10073	2.25e-16	4.28e-15			ARL4D	0.550366	1.80063e-11	3.55492e-10			DCTN4	0.326267	4.05212e-11	6.74129e-10
LYRM9	-1.00268	0.00263985	0.0366616			TAF7	0.335842	2.26e-16	4.3e-15			XPO5	0.288592	1.84548e-11	3.64048e-10			KCTD17	-0.968603	4.1309e-11	6.86673e-10
VPS13B	-0.293834	0.00264296	0.0366733			MBNL2	0.393227	2.28e-16	4.34e-15			TUB	-0.410279	1.86659e-11	3.67914e-10			CRYL1	0.594982	4.14179e-11	6.87922e-10
CTDSP2	-0.250437	0.0026584	0.036856			NRBP1	0.321058	2.34e-16	4.45e-15			NPNT	-0.620129	1.86949e-11	3.68185e-10			FNBP1L	-0.484362	4.21362e-11	6.99283e-10
GTF2IRD2	-0.672993	0.00266218	0.0368768			ZNF282	-0.437722	2.36e-16	4.48e-15			RPL35A	-0.274261	1.92245e-11	3.78306e-10			CLSPN	0.408629	4.33549e-11	7.18922e-10
PRICKLE1	-0.485401	0.00266824	0.0369292			SYP	0.465357	2.54e-16	4.81e-15			SKIV2L	0.34781	1.92755e-11	3.79001e-10			FER	0.433305	4.36116e-11	7.2259e-10
CACNA1B	0.926352	0.002679	0.0370465			AOX1	-0.783677	2.54e-16	4.82e-15			H2AFJ	0.726852	1.93115e-11	3.79401e-10			DACH2	1.81522	4.40881e-11	7.29891e-10
EAF1	0.302675	0.00269661	0.0372583			CHD6	-0.385855	2.55e-16	4.82e-15			SMG1P7	0.79974	1.96749e-11	3.86226e-10			SLC39A7	0.332956	4.4269e-11	7.32291e-10
FOSL2	-0.246587	0.00270041	0.037279			THOP1	-0.451649	2.6e-16	4.91e-15			INTS4	0.363631	2.04742e-11	4.01589e-10			GPRC5C	-0.385191	4.45831e-11	7.36889e-10
PDP2	0.255884	0.002714	0.0373983			PNN	0.368845	2.63e-16	4.97e-15			ENTPD4	0.390912	2.1303e-11	4.17508e-10			DNAH3	2.62602	4.53895e-11	7.49607e-10
BUD23	0.245176	0.00271515	0.0373983			MBLAC2	-0.664515	2.69e-16	5.08e-15			TM2D3	0.430556	2.13307e-11	4.1762e-10			PIR	0.535677	4.5484e-11	7.5056e-10
MCOLN1	0.412564	0.00271598	0.0373983			EPN1	-0.397207	2.71e-16	5.12e-15			GOLM1	-0.330407	2.13433e-11	4.1762e-10			UTP6	0.350848	4.63832e-11	7.64778e-10
STYXL1	-0.349441	0.00272401	0.0374772			KPNA4	0.348759	2.72e-16	5.13e-15			ELL	0.352874	2.15259e-11	4.20852e-10			SRGAP2B	0.606322	4.6826e-11	7.71455e-10
SYT15	-0.56751	0.00272703	0.0374868			CAPZA1	0.309217	2.77e-16	5.22e-15			CHURC1	-0.470327	2.17314e-11	4.24527e-10			COASY	0.382078	4.81797e-11	7.93115e-10
SSC5D	-0.983713	0.00272988	0.0374942			TMEM39A	0.400901	2.79e-16	5.26e-15			TUT7	0.449442	2.21026e-11	4.31428e-10			GRPEL2	0.461647	4.95075e-11	8.14315e-10
IQGAP3	-0.272244	0.00273845	0.0375801			LSMEM1	1.1917	2.8e-16	5.27e-15			ZNF37A	-0.516699	2.25295e-11	4.39406e-10			ZNF331	0.320154	5.02719e-11	8.2622e-10
EDN2	0.656463	0.00274192	0.0375959			PTPN11	0.319123	2.85e-16	5.36e-15			SLC9A2	-0.472404	2.26389e-11	4.41185e-10			YPEL5	0.38656	5.14119e-11	8.44275e-10
ZBTB47	-0.378479	0.00274718	0.0376007			DNAJB5	0.504907	2.9e-16	5.45e-15			PAX8	-0.286712	2.27063e-11	4.42141e-10			CRLS1	-0.5165	5.2258e-11	8.57477e-10
ZNF66	0.516526	0.00275003	0.0376007			TERF2IP	0.501739	3.01e-16	5.64e-15			GALK1	-0.527588	2.287e-11	4.44971e-10			SH2D6	1.66872	5.25703e-11	8.61908e-10
PARP16	-0.429375	0.00275359	0.0376007			GFPT1	0.395471	3.01e-16	5.64e-15			IRF6	0.311599	2.30925e-11	4.48937e-10			TBCK	-0.546397	5.26887e-11	8.63154e-10
ZNF658B	-0.596606	0.0027536	0.0376007			ELOB	-0.384195	3.04e-16	5.69e-15			CXorf38	0.408642	2.47135e-11	4.80066e-10			CIB1	0.402464	5.42443e-11	8.87923e-10
DCP1B	-0.562697	0.00275387	0.0376007			FBXO38	0.408895	3.13e-16	5.85e-15			NSFL1C	0.519442	2.47808e-11	4.80987e-10			ALDH3B1	-0.620872	5.48128e-11	8.96509e-10
PXDC1	-0.27514	0.00275704	0.0376122			MRFAP1L1	-0.37133	3.17e-16	5.94e-15			PIP4K2B	-0.289916	2.4865e-11	4.82232e-10			ZNF408	0.523228	5.51053e-11	9.00568e-10
PQLC3	-0.410105	0.00276034	0.0376256			GPAT3	1.03869	3.2e-16	5.98e-15			DUSP9	-0.690244	2.51063e-11	4.86523e-10			CCDC57	-0.558093	5.66148e-11	9.24497e-10
RPL6P27	-0.254672	0.00277279	0.0377635			IKZF5	0.457267	3.21e-16	6e-15			NPTXR	-0.739228	2.53597e-11	4.91039e-10			GPR75	0.793105	5.6821e-11	9.27121e-10
TRIM65	-0.284312	0.00279108	0.0379807			METTL23	-0.469743	3.23e-16	6.02e-15			AHNAK2	-0.550893	2.63185e-11	5.09197e-10			POLRMT	0.344732	5.72472e-11	9.33326e-10
LONRF2	0.234581	0.00279588	0.0380141			DCAF4L1	1.27901	3.24e-16	6.04e-15			TBK1	0.363208	2.6513e-11	5.1255e-10			FAM214B	0.569351	5.75814e-11	9.38025e-10
C3orf14	0.359902	0.00280381	0.0380454			CTPS2	-0.622275	3.27e-16	6.08e-15			VAV3	-0.295739	2.65512e-11	5.12877e-10			PLIN3	0.408548	5.77726e-11	9.40386e-10
IQCN	-1.04599	0.00280439	0.0380454			LIG3	0.38899	3.33e-16	6.19e-15			FZD4	-0.447871	2.66364e-11	5.13747e-10			EAF2	0.99514	5.88e-11	9.56346e-10
AC112484.3	-0.614983	0.00280721	0.0380454			ZBTB47	-0.725387	3.37e-16	6.26e-15			RAB21	0.422388	2.66387e-11	5.13747e-10			TFEB	-0.69327	5.98534e-11	9.72677e-10
AEN	0.317529	0.00280757	0.0380454			ITPKC	0.501231	3.38e-16	6.29e-15			ALYREF	0.332456	2.66682e-11	5.13906e-10			PRDM11	-0.886493	5.98997e-11	9.72677e-10
SPATA20	-0.359258	0.00281276	0.0380839			NOL9	0.430742	3.46e-16	6.42e-15			ACLY	0.292248	2.67956e-11	5.1595e-10			MAN1A2	0.400359	6.10255e-11	9.90169e-10
HILPDA	0.277846	0.00282768	0.038254			DNAJC18	-0.739379	3.61e-16	6.71e-15			LINC01647	2.83334	2.72293e-11	5.23883e-10			EPCAM	0.35397	6.1226e-11	9.92631e-10
IL15RA	0.386675	0.00283819	0.0383641			C11orf58	-0.355327	3.77e-16	6.99e-15			AC022149.1	0.492105	2.82253e-11	5.42612e-10			MDC1	0.380645	6.17734e-11	1.00071e-09
UTP20	0.278722	0.00284511	0.0384092			VPS28	-0.337208	3.79e-16	7.03e-15			SAPCD2	-0.58565	2.83602e-11	5.44773e-10			PTGR1	-0.661864	6.37633e-11	1.03212e-09
LGALS9	-0.502744	0.00284627	0.0384092			LZTS2	-0.343676	3.9e-16	7.22e-15			CLDND1	0.385086	2.86782e-11	5.50443e-10			CLIP3	-0.334351	6.38742e-11	1.0331e-09
C6orf47	-0.324903	0.00286653	0.0386297			USP47	0.386295	4.07e-16	7.53e-15			C12orf60	0.812726	2.95009e-11	5.65396e-10			TRIM29	-0.514086	6.47214e-11	1.04597e-09
NCEH1	-0.304957	0.00286888	0.0386297			ZNF383	-0.542928	4.08e-16	7.55e-15			STXBP4	0.594327	2.9504e-11	5.65396e-10			ZNF395	-0.507992	6.61885e-11	1.06883e-09
LRP3	0.362839	0.00286976	0.0386297			NR2F2	-0.686302	4.15e-16	7.67e-15			HSP90AA1	0.277247	2.96821e-11	5.68358e-10			PLPPR2	0.327321	6.71007e-11	1.0827e-09
DENND1A	-0.339003	0.00290206	0.0390321			OSER1-DT	0.676714	4.31e-16	7.95e-15			PDIA6	0.30986	3.04858e-11	5.83285e-10			ARHGEF2	0.310115	6.71924e-11	1.08332e-09
TSPAN13	0.365883	0.00291792	0.0391976			BTBD6	-0.513055	4.33e-16	7.99e-15			OGT	-0.265847	3.07768e-11	5.88388e-10			AL451060.1	1.7486	6.75447e-11	1.08814e-09
BNIP3	0.243728	0.0029192	0.0391976			ZNF28	0.639287	4.44e-16	8.18e-15			DROSHA	0.28989	3.11572e-11	5.95189e-10			MBD4	0.401772	7.00889e-11	1.12824e-09
TCF23	-0.645749	0.00297055	0.039854			ERN1	0.767274	4.51e-16	8.31e-15			MUT	0.31777	3.12339e-11	5.96182e-10			TFDP2	-0.330955	7.05232e-11	1.13433e-09
AC015804.1	4.16204	0.00297196	1			MSLNL	-0.679349	4.7e-16	8.65e-15			GALM	-0.632872	3.14306e-11	5.99464e-10			POMP	0.431584	7.13506e-11	1.14673e-09
MOB3B	-0.329822	0.00298815	0.040057			SELENOF	-0.383399	4.76e-16	8.75e-15			GLB1	0.333735	3.22373e-11	6.14364e-10			RAPGEF3	-0.366224	7.18548e-11	1.15393e-09
SNAP25	0.469795	0.00299458	0.0401066			HCFC1	0.323947	4.9e-16	9e-15			LINC00857	-0.605008	3.24026e-11	6.17029e-10			NDN	-0.491771	7.42825e-11	1.19197e-09
ZDHHC2	-0.376159	0.00299679	0.0401066			LASP1	0.286676	5.05e-16	9.27e-15			MRPS26	-0.511829	3.28035e-11	6.24171e-10			AGAP3	-0.366137	7.50419e-11	1.20321e-09
DKC1	0.226822	0.00300616	0.0401987			MRPL22	0.382449	5.13e-16	9.4e-15			PYGL	-0.368959	3.34191e-11	6.35383e-10			APH1A	-0.279864	7.78096e-11	1.24638e-09
THRSP	0.696405	0.00301504	0.0402842			DCTN1	-0.418661	5.4e-16	9.9e-15			ATP13A2	-0.509815	3.38086e-11	6.42284e-10			AHNAK2	-0.591734	7.78569e-11	1.24638e-09
CDH16	0.711284	0.00302382	0.0403611			MXD4	-0.368053	5.51e-16	1.01e-14			MBD4	0.375267	3.43987e-11	6.52981e-10			NEK6	-0.534018	7.82088e-11	1.25103e-09
ABCB7	-0.298537	0.00302578	0.0403611			EVC	-0.918413	5.6e-16	1.02e-14			DDX24	0.313509	3.51879e-11	6.67438e-10			MBLAC2	-0.718552	7.85996e-11	1.2563e-09
SYTL4	-1.00476	0.00302937	0.0403759			SAMD12	-0.653818	5.76e-16	1.05e-14			AP001189.5	2.64474	3.56637e-11	6.75932e-10			CCDC28B	-0.59445	7.96118e-11	1.27065e-09
PTK7	-0.279904	0.00303224	0.0403808			DNPH1	-0.386376	6.09e-16	1.11e-14			DRAP1	0.416965	3.57374e-11	6.76798e-10			TCEANC2	-0.441299	7.96224e-11	1.27065e-09
ACSM3	0.508834	0.00305542	0.0406552			BRSK1	0.629522	6.11e-16	1.12e-14			DHRS11	-0.448966	3.68704e-11	6.97709e-10			ACYP2	0.60714	8.00684e-11	1.27677e-09
ST6GAL1	-0.221561	0.00305785	0.0406552			MARCKS	-0.573903	6.12e-16	1.12e-14			RNASEH2C	-0.46538	3.79972e-11	7.18468e-10			SNHG7	-0.407323	8.02463e-11	1.2786e-09
VASP	-0.299634	0.00307974	0.0409126			EDRF1	0.358106	6.31e-16	1.15e-14			CREBRF	0.428033	3.863e-11	7.29862e-10			SLC4A11	-0.449113	8.06203e-11	1.28266e-09
AC117498.3	-5.30565	0.00308347	1			DCP2	0.324496	6.47e-16	1.18e-14			LSMEM1	0.959724	3.90495e-11	7.37212e-10			NIPA2	0.387376	8.06266e-11	1.28266e-09
SLC23A2	-0.312518	0.00308672	0.0409718			BIRC3	0.803333	6.54e-16	1.19e-14			AC093001.1	1.89713	3.92826e-11	7.41033e-10			STK11IP	0.39125	8.27991e-11	1.31619e-09
LINC02303	-1.68313	0.00309286	1			RBBP9	-0.6081	6.63e-16	1.21e-14			TMEM248	0.275807	3.93542e-11	7.41806e-10			CPEB3	0.818317	8.30095e-11	1.3185e-09
TBC1D8	-0.290906	0.00309409	0.0410259			ASAP1	0.352167	6.71e-16	1.22e-14			PNMA2	-0.590504	3.9388e-11	7.41863e-10			KRT15	0.718445	8.39057e-11	1.3317e-09
SPRED1	-0.357553	0.00309586	0.0410259			DNAJA2	0.321714	6.94e-16	1.26e-14			CSAD	0.419648	3.97001e-11	7.47159e-10			CYBRD1	-0.40732	8.42052e-11	1.33519e-09
APBB1	-0.360916	0.00310735	0.0411445			POMP	0.517605	6.96e-16	1.26e-14			HUNK	-0.668224	3.99757e-11	7.51761e-10			GAPVD1	0.380115	8.42585e-11	1.33519e-09
CAV1	-0.402197	0.00311237	0.0411451			SGTB	0.905515	7.04e-16	1.28e-14			MAN2B1	0.316429	4.05223e-11	7.61447e-10			PRDX2	0.296024	8.4322e-11	1.33519e-09
CDH24	-0.385574	0.00311248	0.0411451			WT1	-0.510005	7.15e-16	1.29e-14			TENM3	0.319129	4.08219e-11	7.66481e-10			MAOA	0.815412	8.47235e-11	1.3405e-09
TMEM223	-0.272843	0.00316281	0.0417452			ALDH1B1	-0.40807	7.74e-16	1.4e-14			LARP1	0.265388	4.11742e-11	7.72496e-10			MSRB1	0.437141	8.48531e-11	1.34151e-09
KIFC3	-0.366467	0.00316302	0.0417452			SEC22B	0.41658	7.78e-16	1.41e-14			ZNF282	-0.32946	4.17412e-11	7.82526e-10			NUP85	-0.352605	8.72128e-11	1.37775e-09
SERPINB1	-0.272304	0.00316961	0.0417981			RUBCN	0.446827	7.98e-16	1.44e-14			KCNQ1	-0.726083	4.19644e-11	7.861e-10			NT5DC3	0.714056	8.73399e-11	1.37868e-09
FBLN2	-0.409822	0.00318145	0.0419202			PLCE1	-0.367373	8.05e-16	1.45e-14			YWHAZ	0.301864	4.31564e-11	8.07804e-10			PRDX4	0.284382	8.8049e-11	1.3888e-09
UTP6	0.229934	0.00319109	0.042013			GAS1	-0.460423	8.28e-16	1.49e-14			MMACHC	-0.531177	4.42838e-11	8.28264e-10			BAHD1	0.40087	8.81789e-11	1.38977e-09
SDCCAG8	-0.310992	0.00319788	0.0420682			CD99	-0.584125	8.32e-16	1.5e-14			TOP2B	-0.387929	4.43777e-11	8.2938e-10			LONP1	0.348803	8.89451e-11	1.40076e-09
ME1	0.408201	0.00322882	0.0424408			POP4	0.424113	8.39e-16	1.51e-14			NUDT12	-0.446614	4.64881e-11	8.68149e-10			SEL1L	0.371938	9.04396e-11	1.4232e-09
FDFT1	0.2344	0.00323612	0.0425022			GPR75	0.938908	8.77e-16	1.58e-14			YPEL5	0.304054	4.72558e-11	8.81805e-10			LAMA2	-0.337539	9.05546e-11	1.42391e-09
MAP4K4	-0.277355	0.00326493	0.042846			PARD6B	0.475459	8.79e-16	1.58e-14			SLC15A1	2.01293	4.75904e-11	8.87363e-10			GNL1	0.332975	9.1414e-11	1.43631e-09
COQ9	-0.264802	0.0032716	0.0428987			SRP54	0.403821	9e-16	1.62e-14			PPFIA3	0.645289	4.84939e-11	9.03512e-10			FHL1	-0.405714	9.20355e-11	1.44496e-09
SNHG11	-0.399785	0.00327815	0.0429322			ALDH5A1	-0.56565	9.18e-16	1.65e-14			TNKS	0.399861	4.86206e-11	9.05175e-10			COPG1	0.312404	9.32799e-11	1.46337e-09
MBTPS2	-0.332457	0.00327945	0.0429322			PTPN1	0.307351	9.25e-16	1.66e-14			SH3BGRL	-0.330415	4.93609e-11	9.1825e-10			SNHG11	-0.723709	9.3695e-11	1.46875e-09
LINC00623	-0.358584	0.00328284	0.0429419			LTBP3	-0.360207	9.29e-16	1.67e-14			PMVK	-0.431886	5.05812e-11	9.40226e-10			GOLM1	-0.33552	9.515e-11	1.48946e-09
RNF207	-0.32682	0.0033033	0.0431537			UBE2T	0.39747	9.34e-16	1.67e-14			B3GAT3	0.428233	5.17304e-11	9.6085e-10			PHYH	-0.48452	9.51621e-11	1.48946e-09
RPSAP19	0.36335	0.00330436	0.0431537			SPRTN	0.516427	9.38e-16	1.68e-14			AC025887.2	2.24921	5.34447e-11	9.91928e-10			ZNF805	1.45058	1.00166e-10	1.56658e-09
SNORD3A	0.643914	0.00335599	0.0437927			EPB41	0.378858	9.43e-16	1.69e-14			TMCO1	0.255563	5.44484e-11	1.00978e-09			PITRM1	0.360782	1.00769e-10	1.57479e-09
SLC41A1	0.222465	0.00336073	0.0438193			AKT1	-0.310429	9.44e-16	1.69e-14			IPO8	-0.38103	5.50433e-11	1.02003e-09			ATP10D	0.500878	1.03531e-10	1.61671e-09
IL1RAP	0.408691	0.00340226	0.0443251			PPFIA1	0.349952	9.65e-16	1.72e-14			PSMD3	-0.379083	5.55004e-11	1.02771e-09			SLC25A27	-0.497022	1.06232e-10	1.65763e-09
AC025154.2	-0.536972	0.00341064	0.0443986			CENPB	-0.34212	9.71e-16	1.73e-14			SARS	0.340586	5.58194e-11	1.03283e-09			LINC01647	3.03598	1.07311e-10	1.67318e-09
CRBN	-0.284765	0.003425	0.0445339			BCCIP	0.38063	9.73e-16	1.74e-14			HNRNPA1	-0.259064	5.70323e-11	1.05447e-09			RPA2	0.275349	1.07444e-10	1.67398e-09
TCHP	-0.453641	0.00342653	0.0445339			TXNL1	0.341095	1e-15	1.79e-14			NLRP1	0.893377	5.76696e-11	1.06543e-09			FBXO30	0.55727	1.08492e-10	1.689e-09
FAH	0.381195	0.00343669	0.0446302			ZNF101	0.351067	1.01e-15	1.81e-14			METAP2	-0.348398	5.80394e-11	1.07145e-09			IFT22	-0.37911	1.10089e-10	1.71256e-09
MEIOB	0.375165	0.00345261	0.044792			MFSD11	0.518233	1.02e-15	1.82e-14			DENND2C	0.713877	5.83279e-11	1.07595e-09			LMNB2	-0.325569	1.1125e-10	1.7293e-09
SSRP1	-0.267648	0.00345468	0.044792			NUP153	0.331242	1.08e-15	1.92e-14			SNX18	-0.505006	5.90662e-11	1.08874e-09			MED10	0.335179	1.11917e-10	1.73833e-09
CTDSP1	-0.327214	0.00347626	0.0450358			TM7SF2	-0.382927	1.09e-15	1.93e-14			AGPAT2	-0.48427	5.9565e-11	1.0971e-09			AGK	-0.469116	1.15925e-10	1.79923e-09
AFAP1	-0.237365	0.00348176	0.0450599			LDLRAP1	-0.788964	1.09e-15	1.93e-14			LRRTM1	-0.517695	5.99593e-11	1.10352e-09			JPT1	0.306663	1.19656e-10	1.85572e-09
EPB41L1	-0.263323	0.00348444	0.0450599			RAB26	-0.770288	1.1e-15	1.95e-14			GPATCH3	0.552602	6.04943e-11	1.11251e-09			AKAP8	0.315559	1.19928e-10	1.85851e-09
SLC25A12	-0.271763	0.00348646	0.0450599			CCDC136	-0.620427	1.17e-15	2.08e-14			SSX6P	3.15003	6.19119e-11	1.13772e-09			LDLRAP1	-0.680849	1.2052e-10	1.86627e-09
RSU1	0.236767	0.00349831	0.0451769			GUCY1B1	0.976207	1.2e-15	2.12e-14			MAP3K2	0.406236	6.27136e-11	1.15158e-09			PNMA3	-0.823729	1.20978e-10	1.87194e-09
SLPI	0.250146	0.00350404	0.0452071			TBC1D15	0.35959	1.25e-15	2.21e-14			LOXL1	-0.727248	6.28935e-11	1.154e-09			PLXNA1	-0.339078	1.21196e-10	1.8739e-09
VCP	0.232442	0.00350622	0.0452071			USF1	0.324807	1.27e-15	2.24e-14			CTNNB1	-0.278237	6.3153e-11	1.15788e-09			VPS51	-0.424502	1.21907e-10	1.88346e-09
AL135925.1	-0.577949	0.00351389	0.04527			VEGFB	-0.465126	1.32e-15	2.33e-14			MOB3B	-0.426949	6.37101e-11	1.16721e-09			STON1	-0.499763	1.22058e-10	1.88435e-09
ERBB3	-0.635266	0.00353881	0.0455548			APEX1	-0.304135	1.34e-15	2.36e-14			FAM69B	-0.664615	6.39827e-11	1.17132e-09			KLF5	0.424813	1.23368e-10	1.90314e-09
DYNC1I1	0.671256	0.00354627	0.0456147			SSBP4	-0.676566	1.38e-15	2.44e-14			DCLRE1A	0.479368	6.4148e-11	1.17346e-09			RTN3	0.3212	1.23728e-10	1.90724e-09
TNRC6C-AS1	-0.49119	0.00355534	0.045695			ABCD3	0.347456	1.5e-15	2.65e-14			NIPA2	0.344634	6.53046e-11	1.19371e-09			TNS1	-0.507846	1.26101e-10	1.94191e-09
WDR74	0.323792	0.00356548	0.0457875			NSD1	-0.321036	1.53e-15	2.7e-14			EIF2B1	0.326637	6.6495e-11	1.21455e-09			SPEF2	-1.56008	1.26167e-10	1.94191e-09
TMUB1	-0.359755	0.00357086	0.0457875			CHPF2	0.328681	1.54e-15	2.72e-14			KIAA1549	-0.398988	6.73666e-11	1.22954e-09			ZDHHC2	-0.549836	1.27961e-10	1.96803e-09
PDLIM1	-0.341542	0.00357357	0.0457875			PACS2	-0.330682	1.56e-15	2.74e-14			ACTR6	0.417958	6.77023e-11	1.23392e-09			BOD1L1	0.360359	1.28714e-10	1.97811e-09
EMX2	-0.230178	0.00357463	0.0457875			KLF5	0.423305	1.58e-15	2.77e-14			ME1	0.642991	6.77084e-11	1.23392e-09			MOGS	0.295692	1.31544e-10	2.02008e-09
BIRC5	-0.237	0.00357918	0.0457875			ATP6V1E1	0.484402	1.6e-15	2.81e-14			SLC2A5	-1.93688	6.85488e-11	1.24829e-09			ARHGEF40	-0.518148	1.31764e-10	2.02193e-09
SRXN1	0.477841	0.00357949	0.0457875			SRPRA	0.3776	1.63e-15	2.85e-14			SDCBP2	1.14633	6.872e-11	1.25047e-09			ADRA2C	-0.912926	1.3461e-10	2.06405e-09
RNU4-82P	-4.68777	0.00359304	1			SETX	0.330456	1.65e-15	2.89e-14			DDAH1	-0.417774	6.95032e-11	1.26377e-09			USP9X	0.316299	1.34786e-10	2.0652e-09
ZNF22	-0.459955	0.00359612	0.045964			CERK	-0.386296	1.67e-15	2.92e-14			CTDSP1	-0.452197	7.15784e-11	1.30052e-09			SLC11A2	-0.334776	1.38381e-10	2.11868e-09
CORO2B	-0.72365	0.00361058	0.0461125			BIVM	-0.51992	1.71e-15	3e-14			CLDN1	0.324228	7.18749e-11	1.30479e-09			GOLGA4	0.42288	1.38899e-10	2.12502e-09
CD22	-0.766912	0.00361414	0.0461215			CCDC9B	-0.382717	1.8e-15	3.16e-14			TPM2	-0.304676	7.19213e-11	1.30479e-09			PQLC1	-0.450317	1.44459e-10	2.20843e-09
ZNF460	0.663936	0.00362352	0.0461821			TTYH3	-0.448167	1.82e-15	3.18e-14			IGSF3	-0.653792	7.20322e-11	1.30582e-09			MRPL15	-0.393715	1.4509e-10	2.2164e-09
LYPD6B	-0.293292	0.00362521	0.0461821			BACE1	-0.735489	1.84e-15	3.22e-14			SFN	0.62688	7.21906e-11	1.30771e-09			DCTN1	-0.340662	1.45442e-10	2.22011e-09
IRF5	-0.542007	0.00362899	0.0461821			RRAGB	0.511229	1.85e-15	3.23e-14			MGAT4B	-0.361618	7.30155e-11	1.32166e-09			ABRAXAS2	-0.543915	1.47911e-10	2.25612e-09
YWHAG	0.217817	0.00363028	0.0461821			OTULIN	0.386713	1.92e-15	3.35e-14			MICAL3	-0.51902	7.46313e-11	1.3499e-09			KLHL13	-0.322712	1.48285e-10	2.26013e-09
TMEM65	0.314132	0.00364758	0.0463657			SMARCC2	-0.272762	1.94e-15	3.37e-14			KAT5	0.453855	7.57744e-11	1.36955e-09			TNRC18	-0.407785	1.4903e-10	2.26978e-09
AL391684.1	-0.41036	0.00367656	0.0466722			EVI5	0.534653	1.96e-15	3.41e-14			TBC1D9B	-0.332044	7.59455e-11	1.37162e-09			ORMDL2	0.53451	1.4994e-10	2.28193e-09
AC233723.2	-1.2044	0.00367745	0.0466722			C18orf25	0.483801	2.08e-15	3.62e-14			CBX1	-0.389111	7.67778e-11	1.38561e-09			PVR	0.408085	1.52314e-10	2.31634e-09
WDR31	-1.19963	0.00368399	0.0467186			CMAS	0.364501	2.11e-15	3.66e-14			RSRC2	0.379346	7.72973e-11	1.39395e-09			PLCE1	-0.345793	1.55245e-10	2.35914e-09
SORL1	0.248628	0.00369599	0.0468342			ELFN2	-1.18103	2.19e-15	3.8e-14			DSTYK	-0.405262	7.87498e-11	1.41908e-09			MGRN1	-0.50115	1.56609e-10	2.3781e-09
HNMT	2.16317	0.0037093	1			EIF5A	0.256956	2.2e-15	3.83e-14			DDN	1.06993	7.93079e-11	1.42807e-09			FAM171A2	-0.888669	1.58373e-10	2.40309e-09
ZNF138	0.383333	0.00371004	0.0469755			BOD1L1	0.368676	2.21e-15	3.83e-14			FBLN1	0.522314	8.07339e-11	1.45267e-09			CCDC136	-0.587103	1.59494e-10	2.417e-09
HMGCL	-0.382952	0.00372147	0.0470835			NVL	-0.574904	2.25e-15	3.9e-14			TRIM14	-0.502109	8.09308e-11	1.45513e-09			HUWE1	0.319281	1.59632e-10	2.417e-09
RALGAPA2	0.246003	0.00372722	0.0471001			PLEKHG4	-0.714093	2.26e-15	3.91e-14			SLC25A27	-0.433672	8.1099e-11	1.45707e-09			SLC35F5	-0.431245	1.59646e-10	2.417e-09
ARID5A	-0.505564	0.0037286	0.0471001			FBXW4	-0.490426	2.32e-15	4.01e-14			LMNB2	-0.351265	8.49911e-11	1.52586e-09			METTL26	-0.5282	1.62014e-10	2.45103e-09
MAFF	0.335416	0.00373326	0.0471165			RAB35	0.343655	2.36e-15	4.08e-14			ATP5F1D	-0.505899	8.7292e-11	1.56601e-09			RMC1	0.422212	1.63678e-10	2.47437e-09
NUDT2	0.308023	0.00373571	0.0471165			PKD2	-0.648177	2.4e-15	4.15e-14			IARS	0.302375	8.81562e-11	1.58034e-09			UBE2S	0.310409	1.68699e-10	2.54839e-09
DKK2	-0.592829	0.0037479	0.0472335			ELL2	1.34369	2.4e-15	4.15e-14			RBM19	0.433864	8.88566e-11	1.59171e-09			KCMF1	0.319591	1.69882e-10	2.56435e-09
ZNHIT6	-0.317592	0.00375227	0.0472517			RIPOR1	-0.46077	2.43e-15	4.19e-14			POLR2A	0.289831	9.11075e-11	1.63082e-09			ELK4	0.410281	1.77608e-10	2.67899e-09
AC087749.1	3.45982	0.00376555	1			SLC12A2	0.407171	2.45e-15	4.22e-14			SLC25A36	-0.392829	9.18813e-11	1.64346e-09			SCRN1	-0.296861	1.89056e-10	2.84956e-09
ADAM12	5.21371	0.00377285	1			PFKL	-0.41646	2.52e-15	4.35e-14			EFNB3	-1.15755	9.35955e-11	1.67288e-09			MRTO4	-0.402401	1.9205e-10	2.89253e-09
UBTF	-0.251428	0.00378862	0.0476725			KIAA1211L	-0.7632	2.58e-15	4.44e-14			TAF9B	-0.411003	9.39146e-11	1.67734e-09			MLF2	0.279785	1.95112e-10	2.93649e-09
PRUNE1	-0.252336	0.00380821	0.0478819			CCDC146	0.427205	2.65e-15	4.57e-14			SSX1	2.4975	9.44163e-11	1.68506e-09			FAM160B1	0.427248	1.95297e-10	2.9371e-09
TLR5	-0.686487	0.00381839	0.0479725			MUT	0.376434	2.66e-15	4.57e-14			PQLC1	-0.473197	1.02664e-10	1.83075e-09			GPRC5A	0.35091	2.02696e-10	3.04613e-09
LYSMD1	0.25623	0.00383719	0.0481715			RPARP-AS1	-0.593598	2.69e-15	4.62e-14			TANGO2	0.571205	1.02731e-10	1.83075e-09			FOCAD	0.550124	2.03631e-10	3.05792e-09
MPI	-0.301341	0.00384205	0.0481951			FUBP3	0.330815	2.69e-15	4.62e-14			GARS	0.358069	1.04728e-10	1.86496e-09			RAB34	-0.347344	2.05072e-10	3.07729e-09
PGM5	-5.25919	0.00384315	1			TSC2	-0.317336	2.73e-15	4.68e-14			ATP13A4	2.247	1.05214e-10	1.87223e-09			CALCOCO2	0.399643	2.0595e-10	3.08819e-09
GLA	0.226671	0.00387147	0.0485266			RBM26	0.325649	2.75e-15	4.71e-14			GSK3B	0.331353	1.06283e-10	1.88987e-09			NELFE	0.31838	2.06962e-10	3.10107e-09
PIP5KL1	-0.510993	0.00387517	0.0485355			ADRA2C	-0.938785	2.76e-15	4.73e-14			SSBP4	-0.500921	1.07306e-10	1.90665e-09			RAB11FIP3	-0.464831	2.09476e-10	3.13644e-09
FANCF	-0.331606	0.00387955	0.0485528			TMEM139	-0.554536	2.78e-15	4.76e-14			ABRAXAS2	-0.488084	1.07515e-10	1.90896e-09			GORASP1	-0.41084	2.11391e-10	3.16279e-09
HRASLS2	1.57149	0.00388569	0.0485921			LIN52	0.689508	2.79e-15	4.77e-14			LRRTM4	1.69204	1.08416e-10	1.92355e-09			SSRP1	-0.378637	2.13055e-10	3.18535e-09
KLHDC2	-0.287796	0.00389842	0.0486952			CAMSAP2	0.31488	2.8e-15	4.78e-14			CPEB4	0.352859	1.1147e-10	1.97629e-09			AL365181.3	1.61351	2.13462e-10	3.18909e-09
MAST1	0.30293	0.00389994	0.0486952			GBP2	0.634359	2.82e-15	4.83e-14			CNDP2	0.320511	1.1217e-10	1.98723e-09			ALYREF	0.342975	2.14279e-10	3.19895e-09
CYB561D1	-0.309422	0.00391697	0.0488634			VWA7	0.740516	2.86e-15	4.88e-14			RC3H2	0.361354	1.13457e-10	2.00856e-09			LRRC8A	0.338454	2.20467e-10	3.28891e-09
BCAT1	-0.319697	0.00391945	0.0488634			CCDC8	-0.605162	2.89e-15	4.94e-14			CLIP3	-0.31381	1.13816e-10	2.01261e-09			GBP2	0.60321	2.22256e-10	3.31318e-09
MARVELD1	-0.313309	0.00394334	0.0491104			UBQLN2	0.389879	3.01e-15	5.12e-14			ZNF281	0.370601	1.13852e-10	2.01261e-09			MYCBP2	0.312975	2.32083e-10	3.45714e-09
HIPK2	-0.659769	0.00394594	0.0491104			TRMT6	0.425359	3.06e-15	5.21e-14			ENO2	0.42718	1.14653e-10	2.02528e-09			YWHAB	0.273684	2.32296e-10	3.45778e-09
ATF3	0.308301	0.00394834	0.0491104			ZNF558	0.30711	3.08e-15	5.24e-14			PTGR1	-0.581046	1.15865e-10	2.0452e-09			ARV1	-0.401419	2.33385e-10	3.47145e-09
ACSS2	0.251568	0.00395477	0.0491526			PTGES2	-0.494459	3.14e-15	5.34e-14			SLC46A3	0.95652	1.16788e-10	2.05998e-09			VASP	-0.437686	2.36235e-10	3.51128e-09
KLF12	-0.468413	0.00399436	0.0496066			CHFR	0.445751	3.18e-15	5.41e-14			GDI1	0.327665	1.18145e-10	2.0824e-09			ARPC5L	0.336206	2.38126e-10	3.53681e-09
HS3ST3B1	0.467946	0.00400048	0.0496446			KDM2A	0.298111	3.28e-15	5.58e-14			RARS2	0.355567	1.191e-10	2.09771e-09			ATP6AP2	0.297734	2.40032e-10	3.56252e-09
AARS2	-0.364137	0.00400543	0.049668			RABL6	-0.390535	3.36e-15	5.7e-14			SNCG	0.546976	1.19338e-10	2.10036e-09			TTC30B	-0.741836	2.40478e-10	3.56653e-09
EIF4A3	0.243541	0.00403063	0.0498001			ANXA11	-0.283776	3.49e-15	5.91e-14			2025-09-03	-0.602648	1.20199e-10	2.11398e-09			CLDN1	0.378519	2.42507e-10	3.59401e-09
IQGAP2	-0.253273	0.00403471	0.0498001			SLC39A7	0.268768	3.55e-15	6.03e-14			SH2D6	1.4977	1.20386e-10	2.11573e-09			ZNF302	-0.441052	2.498e-10	3.69941e-09
SAP130	0.275091	0.00403636	0.0498001			COL4A3	1.75078	3.56e-15	6.03e-14			KLF5	0.349002	1.22736e-10	2.15546e-09			DOHH	0.595146	2.50139e-10	3.70174e-09
APOL1	0.309093	0.00403759	0.0498001			FAAP100	-0.549446	3.6e-15	6.09e-14			ANP32E	0.426824	1.23737e-10	2.17147e-09			TBC1D9B	-0.371266	2.54013e-10	3.75633e-09
AP5M1	-0.337029	0.00403959	0.0498001			SLU7	0.310694	3.63e-15	6.15e-14			MEGF8	-0.366423	1.24177e-10	2.1776e-09			EIF5A2	0.543217	2.61998e-10	3.8716e-09
KCNAB1	0.551837	0.00404078	0.0498001			ZSWIM8	0.32284	3.84e-15	6.49e-14			MIA3	0.38075	1.26216e-10	2.21045e-09			TNS2	-0.646407	2.65182e-10	3.91581e-09
DEF8	-0.519197	0.00404102	0.0498001			AIMP1	-0.443991	3.86e-15	6.52e-14			NIPSNAP1	-0.312183	1.26233e-10	2.21045e-09			RUBCN	0.432539	2.6673e-10	3.93581e-09
XKR7	0.666751	0.00404126	0.0498001			PRRC2C	0.308283	3.88e-15	6.55e-14			SLPI	0.381702	1.30517e-10	2.28358e-09			KCNH3	-0.639631	2.67785e-10	3.94852e-09
AC138207.4	0.683483	0.00404374	0.0498001			SPON1	-0.230873	3.92e-15	6.62e-14			ZNF678	0.476962	1.30598e-10	2.28358e-09			SPAG5	0.346987	2.68519e-10	3.95647e-09
IGHMBP2	0.266923	0.00405307	0.0498771			CCDC117	-0.563424	3.95e-15	6.66e-14			IMPAD1	0.343684	1.30935e-10	2.28782e-09			CDK6	0.430033	2.7451e-10	4.04182e-09
CRTAP	-0.216888	0.00411794	0.050637			VEGFA	0.269768	4.02e-15	6.77e-14			ZACN	1.073	1.32793e-10	2.31861e-09			SAR1A	0.270357	2.83013e-10	4.16401e-09
AC007743.1	-3.40363	0.00411853	1			IARS	0.355235	4.07e-15	6.85e-14			DOLPP1	0.516955	1.36677e-10	2.38469e-09			EPB41L2	0.339758	2.834e-10	4.16669e-09
LIF	-0.321413	0.00412894	0.0507337			ZNF165	0.575019	4.15e-15	6.98e-14			USP9X	0.306847	1.3695e-10	2.38772e-09			LAMA3	0.246065	2.87364e-10	4.21917e-09
MRPL22	0.222027	0.00413689	0.0507929			SMG5	0.296639	4.16e-15	6.99e-14			2025-03-11	-0.865166	1.39316e-10	2.42724e-09			UBTF	-0.375833	2.87384e-10	4.21917e-09
AC020928.1	0.466933	0.0041511	0.0509287			UBE2C	0.361337	4.21e-15	7.07e-14			TCP1	0.24715	1.40253e-10	2.44179e-09			RNASEH2C	-0.458604	2.87961e-10	4.2246e-09
ZBTB40	-0.237703	0.00415617	0.0509524			WIZ	-0.355265	4.53e-15	7.59e-14			MRFAP1L1	-0.30647	1.43792e-10	2.50161e-09			SRPRA	0.386633	2.92784e-10	4.29227e-09
COLGALT1	0.251183	0.00416114	0.0509747			TST	-0.599876	4.56e-15	7.64e-14			SCNN1A	0.309592	1.43989e-10	2.50323e-09			AC025154.2	-1.01835	2.93419e-10	4.29849e-09
MIR99AHG	-0.52591	0.00418406	0.0512168			ANXA2	0.254315	4.62e-15	7.73e-14			RDH14	-0.607605	1.44965e-10	2.51839e-09			TES	0.29833	2.94343e-10	4.30892e-09
C12orf45	0.339149	0.00421881	0.0516032			SORT1	0.261421	4.92e-15	8.25e-14			ZBED5	-0.417556	1.4568e-10	2.52899e-09			SLC36A1	0.548629	3.02408e-10	4.42381e-09
ING1	0.23215	0.00422607	0.051653			TANGO2	0.748689	5.05e-15	8.45e-14			KIF11	-0.411364	1.46096e-10	2.5344e-09			SAPCD2	-0.589345	3.06473e-10	4.48005e-09
USP5	0.273685	0.00423431	0.0517148			METAP2	-0.37584	5.06e-15	8.47e-14			SERPINH1	0.303905	1.4728e-10	2.55309e-09			INO80D	0.566944	3.08689e-10	4.50921e-09
HSPA12A	-0.266381	0.00424732	0.0518345			PCYT1A	0.306981	5.12e-15	8.55e-14			KPNA2	0.2684	1.47811e-10	2.56047e-09			SLC25A12	-0.447121	3.10539e-10	4.53298e-09
CYP4F8	5.22666	0.00425419	1			RIOK1	0.422854	5.18e-15	8.65e-14			RETREG1	-0.471878	1.49676e-10	2.59093e-09			RIN2	-0.375133	3.11998e-10	4.54894e-09
SLC9A4	-0.340538	0.00427593	0.0521445			CCND1	-0.595312	5.26e-15	8.78e-14			PSEN2	-0.494567	1.51295e-10	2.61706e-09			OSMR	0.315492	3.1208e-10	4.54894e-09
ATP1B3	0.22174	0.00428141	0.0521721			LAMC3	-0.59249	5.29e-15	8.82e-14			ELMOD2	-0.436646	1.51939e-10	2.62632e-09			LAMC3	-0.485745	3.14409e-10	4.57962e-09
ILF2	0.202969	0.00428868	0.0522214			STIM2	0.474922	5.71e-15	9.51e-14			SLC10A3	0.383493	1.55155e-10	2.68e-09			RBMX	-0.316555	3.16956e-10	4.61343e-09
ADAT2	0.356533	0.00434378	0.0528526			HARS2	-0.386256	5.82e-15	9.68e-14			CKB	-0.469391	1.55345e-10	2.68136e-09			CLPTM1	0.322191	3.19022e-10	4.63964e-09
MPZ	0.392524	0.00435206	0.0529137			RMC1	0.438803	6.01e-15	9.99e-14			CKAP4	-0.373482	1.59093e-10	2.74409e-09			CREB3	0.368832	3.19213e-10	4.63964e-09
UCA1	0.998855	0.00436351	0.053013			PHYH	-0.529023	6.2e-15	1.03e-13			AKTIP	0.465757	1.61867e-10	2.78995e-09			MPZL3	0.660696	3.20805e-10	4.65945e-09
EEF1AKMT2	-0.786866	0.00436937	0.0530259			COPG1	0.244302	6.25e-15	1.04e-13			CHMP7	0.300656	1.64395e-10	2.8315e-09			IPO8	-0.363041	3.22198e-10	4.67634e-09
HES1	0.363486	0.00437111	0.0530259			WNK3	0.599161	6.59e-15	1.09e-13			FUNDC1	0.356886	1.703e-10	2.93113e-09			ZNF362	-0.764267	3.28308e-10	4.76164e-09
TRIOBP	-0.277621	0.0043853	0.0531582			CITED2	-0.412046	6.6e-15	1.1e-13			NR4A3	0.780023	1.72125e-10	2.96042e-09			ZNF678	0.584757	3.2908e-10	4.76944e-09
LCN12	-0.57181	0.00439789	0.053271			WDR83	0.587879	6.73e-15	1.12e-13			LLGL1	-0.477815	1.74857e-10	3.00527e-09			DCAF13	0.28034	3.36383e-10	4.87182e-09
LINC02273	4.06243	0.00443881	1			PNPT1	0.371682	6.81e-15	1.13e-13			ZNF581	-0.465859	1.77859e-10	3.0547e-09			NSUN5	0.334009	3.39221e-10	4.90943e-09
ANXA9	-0.516363	0.00444207	0.0537659			ITCH	0.329394	6.82e-15	1.13e-13			GPR108	0.420745	1.80942e-10	3.10544e-09			SCYL1	0.306417	3.44177e-10	4.97762e-09
TBX2	-0.464123	0.00444814	0.0537884			CALCOCO2	0.426662	6.88e-15	1.14e-13			SDC1	-0.606207	1.81437e-10	3.11173e-09			GALK1	-0.506043	3.47502e-10	5.02213e-09
MVD	0.323253	0.00445056	0.0537884			PLXNB2	-0.295931	6.9e-15	1.14e-13			CACNB3	-0.472615	1.87332e-10	3.21055e-09			AHCYL2	0.354099	3.56883e-10	5.15404e-09
MLPH	4.07788	0.00445955	1			TMEM184A	-0.562474	6.93e-15	1.14e-13			CARHSP1	-0.3853	1.89213e-10	3.2405e-09			CCDC47	0.318975	3.6067e-10	5.20505e-09
FAM174A	0.267093	0.00446036	0.0538667			BCORL1	-0.512169	6.96e-15	1.15e-13			CLTC	0.310349	1.90903e-10	3.26712e-09			POU5F1	0.607701	3.61682e-10	5.21595e-09
ZNF562	0.256812	0.00446691	0.0539055			PAFAH1B1	0.351719	7.07e-15	1.17e-13			R3HCC1	-0.797995	1.92114e-10	3.28551e-09			HSPA4L	0.420237	3.74019e-10	5.38998e-09
CHD6	-0.231084	0.00448849	0.0540797			PGLS	-0.442663	7.12e-15	1.17e-13			CFAP97	-0.411793	1.9393e-10	3.31423e-09			KIAA1549	-0.428603	3.74279e-10	5.38998e-09
TMEM147	0.293221	0.00448934	0.0540797			PDE4D	0.769156	7.17e-15	1.18e-13			CYTH2	0.377397	1.96116e-10	3.34922e-09			TRMT6	0.388921	3.75569e-10	5.40474e-09
RN7SL3	0.949631	0.00449166	0.0540797			SPTBN2	-0.462941	7.22e-15	1.19e-13			ILF2	0.277499	1.98218e-10	3.38273e-09			CP	0.495212	3.80664e-10	5.47419e-09
SRGAP2B	0.361912	0.00449469	0.0540797			SLC12A8	1.48541	7.26e-15	1.19e-13			F2RL2	-0.474213	1.99426e-10	3.39861e-09			ATOH8	-1.27719	3.82949e-10	5.50317e-09
LDHAP4	0.450224	0.00450889	0.0542104			YKT6	0.296157	7.42e-15	1.22e-13			KLHL15	0.426587	1.9943e-10	3.39861e-09			METTL23	-0.409984	3.85145e-10	5.53082e-09
PPID	0.239318	0.00454752	0.0546343			NDUFA1	-0.354613	7.51e-15	1.23e-13			EPB41L2	0.341213	2.03206e-10	3.46051e-09			BAIAP2-DT	-0.542071	3.85916e-10	5.53769e-09
MRPS15	0.230778	0.00455182	0.0546454			ME1	0.758423	7.64e-15	1.25e-13			STK4	0.304983	2.03432e-10	3.46193e-09			COL5A1	-0.772427	3.86167e-10	5.53769e-09
ZDHHC8	-0.404036	0.00455853	0.0546558			PSMC2	0.306247	7.76e-15	1.27e-13			TAB1	-0.4235	2.08158e-10	3.53986e-09			CBLL1	0.326697	3.87901e-10	5.55863e-09
NR1D1	0.488768	0.00455943	0.0546558			ZNF623	-0.52767	7.78e-15	1.28e-13			ORC6	0.307922	2.1074e-10	3.58055e-09			ABCB10	-0.45461	3.88909e-10	5.56916e-09
FGFBP1	-0.697822	0.00456472	0.0546788			INTS3	-0.315456	7.86e-15	1.29e-13			CCDC40	0.510465	2.10847e-10	3.58055e-09			PRRC1	0.370381	3.91346e-10	5.60012e-09
AP3B2	0.258642	0.00458585	0.0548913			KCNQ1	-0.816899	8.08e-15	1.32e-13			HES1	0.604699	2.12074e-10	3.59885e-09			CIAO2A	-0.400604	3.92496e-10	5.61263e-09
ACTR10	-0.343582	0.00459546	0.0549546			ARHGEF11	-0.382137	8.12e-15	1.33e-13			SLC4A11	-0.438534	2.12895e-10	3.61025e-09			ATP2C1	0.259723	3.93888e-10	5.6286e-09
RAB43	-0.571618	0.00459792	0.0549546			CRIPT	0.497549	8.16e-15	1.33e-13			TRERF1	-0.548118	2.14782e-10	3.63969e-09			ZFP36L2	-0.41159	3.9878e-10	5.6945e-09
GNL2	0.201996	0.00461282	0.0550921			ARF1	0.271446	8.4e-15	1.37e-13			TYW1	0.391453	2.18412e-10	3.69862e-09			RAVER2	-0.359854	3.99927e-10	5.70688e-09
ZNF850	0.336352	0.00464585	0.0554457			EIF2AK3	0.553266	8.48e-15	1.38e-13			DCUN1D3	0.544332	2.20153e-10	3.72548e-09			ARHGEF3	-0.427743	4.02404e-10	5.73821e-09
ZSCAN16-AS1	-0.521145	0.00465498	0.0555138			LTN1	0.367435	9.14e-15	1.49e-13			TMEM100	-0.7142	2.23379e-10	3.77744e-09			CDC25A	0.444329	4.0496e-10	5.77062e-09
TBC1D8B	-0.490939	0.00465849	0.0555148			TXNRD2	-0.746616	9.37e-15	1.53e-13			CTDSPL	-0.38147	2.24152e-10	3.78785e-09			CHCHD10	-0.441233	4.06339e-10	5.78621e-09
HPS1	-0.275474	0.00467643	0.0556816			AC025154.2	-1.07292	9.77e-15	1.59e-13			CHPF2	0.328152	2.24347e-10	3.7885e-09			LRRN2	-0.669174	4.1005e-10	5.83498e-09
NDUFAF2	0.347779	0.00467935	0.0556816			NR4A3	0.949722	9.92e-15	1.61e-13			CHAC1	0.804229	2.30572e-10	3.8909e-09			JKAMP	0.403454	4.12972e-10	5.87245e-09
VDAC1P1	0.466542	0.00468718	0.0557338			FASTKD1	-0.562734	1.02e-14	1.66e-13			MRPL22	0.297505	2.31279e-10	3.90012e-09			DNAJB5	0.463423	4.1992e-10	5.96708e-09
AL355001.2	-1.14606	0.00470245	0.0558743			MVB12B	-0.921618	1.04e-14	1.68e-13			DNAJC18	-0.559253	2.33463e-10	3.93419e-09			DTX4	-0.779135	4.22671e-10	6.00198e-09
ZNF37BP	-0.274584	0.00470705	0.055888			MYDGF	0.459026	1.05e-14	1.71e-13			MACROD2	-0.340039	2.37718e-10	4.00181e-09			BUD31	0.385955	4.26002e-10	6.04158e-09
ZNF879	-0.45268	0.00472874	0.0561044			YIPF1	0.517609	1.07e-14	1.74e-13			SH3TC2	1.56573	2.37807e-10	4.00181e-09			NPTX2	0.722289	4.26052e-10	6.04158e-09
ZNF333	0.288764	0.004749	0.0563036			SMIM30	-0.480947	1.09e-14	1.77e-13			UBXN4	0.351801	2.54189e-10	4.27452e-09			RSRC2	0.378712	4.40475e-10	6.24174e-09
AC005520.5	5.15574	0.00475577	1			STON1	-0.484604	1.13e-14	1.83e-13			NDUFC2	-0.512819	2.54875e-10	4.28307e-09			SLC1A2	2.89752	4.42697e-10	6.26887e-09
SMTN	0.332072	0.00476576	0.0564461			CFAP97	-0.443804	1.13e-14	1.83e-13			SRP54	0.308062	2.55091e-10	4.28371e-09			BTBD6	-0.51533	4.43589e-10	6.27713e-09
SLC9A6	-0.325499	0.00476798	0.0564461			PATZ1	-0.480201	1.18e-14	1.91e-13			EFHD1	-1.12861	2.61617e-10	4.38927e-09			CRY1	0.536556	4.56173e-10	6.45006e-09
TRAM2-AS1	-0.613894	0.00477772	0.0565201			SLC46A3	1.17485	1.26e-14	2.04e-13			HBP1	0.331199	2.61739e-10	4.38927e-09			ZDHHC8	-0.662958	4.56442e-10	6.45006e-09
LINC01605	5.14453	0.00479234	1			NEDD1	0.378929	1.26e-14	2.04e-13			ZNF239	-0.426866	2.66513e-10	4.46622e-09			SRD5A3	-0.836524	4.59924e-10	6.49475e-09
UNC13A	0.338673	0.0047953	0.0566557			EIF2B1	0.37125	1.27e-14	2.06e-13			ETV5	0.418443	2.69893e-10	4.51972e-09			AGTRAP	0.429334	4.60315e-10	6.49576e-09
SNRPEP4	0.367469	0.00479816	0.0566557			CPNE3	-0.312345	1.28e-14	2.06e-13			RAB36	-0.712238	2.70689e-10	4.52992e-09			MRPL40	-0.603958	4.7748e-10	6.73333e-09
ZMYM1	-0.38796	0.00479967	0.0566557			CPD	0.311873	1.29e-14	2.08e-13			HDHD5	-0.532079	2.75403e-10	4.60561e-09			MSLNL	-0.756232	4.82784e-10	6.80341e-09
CACNA2D3	-0.574664	0.00480415	0.0566673			PI4KB	-0.3279	1.3e-14	2.09e-13			ATP6V1E1	0.388473	2.78557e-10	4.65513e-09			NUP153	0.329105	4.90392e-10	6.90585e-09
REEP5	-0.269308	0.00481254	0.0566994			SMIM13	-0.531789	1.31e-14	2.12e-13			EPS8L1	-0.417102	2.79988e-10	4.67583e-09			ITM2C	-0.319612	4.9093e-10	6.90865e-09
PAK6	-0.721798	0.00481387	0.0566994			ACP6	-0.538666	1.33e-14	2.14e-13			SKP2	-0.407862	2.807e-10	4.68447e-09			RIOK3	0.357031	4.92913e-10	6.93176e-09
SCML4	5.2626	0.00482428	1			CCNT1	0.324771	1.35e-14	2.17e-13			DAP3	0.275833	2.88698e-10	4.81462e-09			KIF12	-0.804906	4.93851e-10	6.94016e-09
PAX8	-0.261474	0.00483262	0.0568789			TRIP13	0.29418	1.38e-14	2.22e-13			DENND1A	-0.463838	2.89545e-10	4.82542e-09			TIMM21	-0.46985	5.09894e-10	7.16067e-09
PIAS3	-0.255101	0.00485875	0.057145			OPA1	0.330379	1.42e-14	2.28e-13			FBXO30	0.520398	2.92145e-10	4.8654e-09			TSC22D1	0.343418	5.19378e-10	7.28883e-09
ARHGAP8	1.29397	0.00487766	0.0573257			RBM48	0.452597	1.43e-14	2.3e-13			ELOVL6	-0.429328	2.92769e-10	4.87243e-09			NTSR1	-0.767111	5.21005e-10	7.30663e-09
MFSD13A	0.278677	0.0049098	0.0576617			DNAJA1	0.264199	1.53e-14	2.46e-13			DCAF13	0.25403	2.98092e-10	4.95624e-09			AKIRIN1	0.317796	5.25326e-10	7.36216e-09
ABI3BP	0.938131	0.00491455	0.0576757			BBOX1	-0.508331	1.53e-14	2.46e-13			ORC5	-0.310268	2.98215e-10	4.95624e-09			LAPTM4A	0.291527	5.28819e-10	7.40601e-09
SYT13	-0.559812	0.00493909	0.0579046			CAP1	0.250006	1.54e-14	2.47e-13			PHETA1	-0.66192	2.98468e-10	4.95703e-09			SP1	0.275127	5.304e-10	7.42305e-09
MGAT4B	-0.280061	0.0049412	0.0579046			SSSCA1	0.447883	1.55e-14	2.48e-13			PMM1	0.475196	3.07664e-10	5.10626e-09			RELA	0.29772	5.38025e-10	7.52459e-09
CUEDC2	-0.280961	0.00494651	0.0579249			DTX4	-0.803863	1.55e-14	2.49e-13			ZDHHC13	-0.348212	3.10822e-10	5.15512e-09			CUL7	-0.355654	5.39014e-10	7.53325e-09
BAALC	1.9506	0.004948	1			ORC1	0.42583	1.56e-14	2.49e-13			TMEM125	-0.580322	3.1771e-10	5.26575e-09			H2AFY	-0.249384	5.42958e-10	7.58316e-09
AL359551.1	-5.15745	0.00494877	1			RERE	-0.345579	1.59e-14	2.53e-13			PARP10	-0.369562	3.19082e-10	5.28486e-09			CRIPT	0.46216	5.57863e-10	7.786e-09
EXOC3L1	0.440995	0.00495329	0.0579624			AHCY	-0.240561	1.61e-14	2.57e-13			PDE3A	0.928729	3.22178e-10	5.33248e-09			CYB561A3	-0.39577	5.58969e-10	7.79608e-09
LFNG	-0.471538	0.00497003	0.0580905			NDST1	-0.255522	1.62e-14	2.58e-13			APBA2	-0.496448	3.2429e-10	5.36378e-09			EIF4G1	0.255578	5.61212e-10	7.82201e-09
SLC3A2	0.24332	0.00497211	0.0580905			MAN2B2	0.331057	1.63e-14	2.59e-13			PLA2G4C	0.946289	3.29992e-10	5.45435e-09			GANAB	0.293268	5.75718e-10	8.0187e-09
HELLPAR	0.532274	0.00497766	0.0580905			CRLS1	-0.512628	1.69e-14	2.69e-13			CDK12	0.328438	3.3268e-10	5.49502e-09			HPS6	-0.493138	5.77339e-10	8.03579e-09
HTR1F	-1.80355	0.00497867	1			PLS3	0.29509	1.74e-14	2.76e-13			ZNF331	0.284712	3.35488e-10	5.53561e-09			MTHFD2	0.315483	5.83267e-10	8.10737e-09
PLCG2	-0.383017	0.00498019	0.0580905			MYL9	-0.43192	1.76e-14	2.8e-13			TLE3	0.408059	3.35596e-10	5.53561e-09			LMO1	-0.754186	5.83278e-10	8.10737e-09
KAZN	0.230104	0.0049846	0.0580905			PTPRU	-0.7405	1.77e-14	2.81e-13			H2AFY	-0.249683	3.36765e-10	5.55111e-09			WDR34	-0.349271	5.89348e-10	8.18614e-09
NPR2	-0.326984	0.00498574	0.0580905			VASN	-0.531211	1.77e-14	2.82e-13			TMEM189	0.313	3.38845e-10	5.58159e-09			PSMB7	0.302217	6.04033e-10	8.3844e-09
POM121B	-0.808459	0.00503896	0.0586684			CHMP2B	0.42043	1.9e-14	3.01e-13			NOTCH1	-0.519674	3.4098e-10	5.61293e-09			MIR4435-2HG	0.550143	6.05667e-10	8.40136e-09
C7orf57	5.14538	0.00506152	1			RNASEH2C	-0.480837	1.94e-14	3.08e-13			PCMT1	0.322395	3.49581e-10	5.75059e-09			TMCO1	0.275075	6.11183e-10	8.47153e-09
ATP6AP1	0.255538	0.00506632	0.0589167			SP1	0.289722	1.97e-14	3.12e-13			RNPEPL1	-0.49486	3.49819e-10	5.75059e-09			ATP6V1H	0.37752	6.11558e-10	8.47153e-09
CIAO2B	0.302166	0.0050693	0.0589167			SERPINH1	0.296097	1.97e-14	3.12e-13			BAG1	0.282262	3.5154e-10	5.77496e-09			MBTPS2	-0.500606	6.15872e-10	8.5255e-09
TRMO	0.301084	0.00507143	0.0589167			RAB29	-0.531914	2e-14	3.17e-13			NECAB2	1.99876	3.60278e-10	5.91448e-09			MRPL22	0.328292	6.16469e-10	8.52796e-09
MSN	0.216325	0.00507483	0.0589167			SLC16A2	-0.729802	2e-14	3.17e-13			FBXO41	-0.362117	3.61531e-10	5.93102e-09			SLC46A3	1.1051	6.23205e-10	8.61529e-09
GRIK5	0.767927	0.00508496	0.058992			PPP3CB	-0.411598	2.03e-14	3.21e-13			VPS41	-0.392221	3.67447e-10	6.02398e-09			NSMCE4A	-0.452807	6.24216e-10	8.62342e-09
TUBG1	0.325974	0.0050977	0.0590812			DAG1	-0.274517	2.05e-14	3.24e-13			DNTTIP1	0.361166	3.76971e-10	6.17593e-09			VANGL1	-0.443271	6.37434e-10	8.80004e-09
ATF7	0.307267	0.00509993	0.0590812			TRMO	0.622016	2.06e-14	3.25e-13			TUBA1C	0.349077	3.79847e-10	6.21884e-09			TMEM69	-0.404653	6.44637e-10	8.89345e-09
APMAP	0.237647	0.00511316	0.0591921			ZBED3	-0.580766	2.07e-14	3.27e-13			CCDC9	0.372954	3.84451e-10	6.28996e-09			POLR2L	-0.419751	6.51094e-10	8.97645e-09
WDR19	-0.3112	0.00512027	0.0592321			DPY19L3	0.333276	2.1e-14	3.32e-13			DDX21	0.268386	3.87967e-10	6.34319e-09			TRMO	0.525566	6.58455e-10	9.0665e-09
ZNF480	-0.364981	0.00513471	0.0593568			TMEM214	-0.419318	2.18e-14	3.43e-13			SEMA6D	-0.661548	3.92972e-10	6.42066e-09			GALM	-0.679859	6.58515e-10	9.0665e-09
NOM1	0.21816	0.00514582	0.0594429			ITPRID2	0.333948	2.26e-14	3.56e-13			MPZL3	0.598767	4.00653e-10	6.54174e-09			DDN	1.11344	6.66775e-10	9.17401e-09
ITPR1	0.560801	0.00515002	0.059449			SRD5A3	-0.869639	2.31e-14	3.64e-13			UTP6	0.299939	4.01758e-10	6.55536e-09			PAFAH1B1	0.322159	6.77436e-10	9.3144e-09
TBCK	-0.323943	0.00515784	0.0594969			BCAT2	-0.569293	2.31e-14	3.64e-13			OSTM1	0.376624	4.03393e-10	6.57759e-09			KANK2	-0.433678	6.95725e-10	9.55941e-09
LYG2	1.27485	0.0051632	0.0595163			PTPN18	-0.426726	2.33e-14	3.66e-13			BAIAP2-DT	-0.473662	4.04557e-10	6.59213e-09			RNF181	0.37592	7.11007e-10	9.75663e-09
AZIN1-AS1	-0.775739	0.00516835	0.0595334			PJA2	0.310019	2.48e-14	3.89e-13			TMEM223	-0.368409	4.07453e-10	6.63484e-09			PTPN11	0.29009	7.11036e-10	9.75663e-09
2025-03-03	0.617438	0.00521779	0.0599849			MRPL35	-0.526387	2.55e-14	4e-13			CHMP1B	0.386622	4.12649e-10	6.71493e-09			MCU	-0.287601	7.17661e-10	9.8409e-09
DDX24	0.219526	0.00522108	0.0599849			RPL35A	-0.328391	2.59e-14	4.06e-13			MYCBP2	0.289183	4.13644e-10	6.72659e-09			UQCRH	0.700495	7.25153e-10	9.93694e-09
TTLL7	0.341162	0.00522172	0.0599849			LIFR	0.462395	2.61e-14	4.09e-13			RRAGB	0.445688	4.19733e-10	6.82101e-09			STOX1	-0.660607	7.25847e-10	9.93976e-09
SERPING1	-0.371455	0.00522236	0.0599849			PTPRG	-0.346049	2.62e-14	4.1e-13			FAM92A	-0.613135	4.29497e-10	6.97499e-09			CPNE3	-0.34196	7.27644e-10	9.95767e-09
OR56A3	2.38033	0.00523346	1			AKTIP	0.55425	2.65e-14	4.15e-13			TAF7	0.264362	4.29927e-10	6.97728e-09			ATP13A2	-0.488268	7.44251e-10	1.01781e-08
SAAL1	-0.379994	0.00524776	0.060234			HLA-B	0.320604	2.66e-14	4.16e-13			KCTD15	-0.459964	4.30246e-10	6.97778e-09			GEMIN8P4	0.681238	7.5508e-10	1.03193e-08
EBNA1BP2	0.201507	0.00525839	0.0603133			MPHOSPH9	0.478007	2.66e-14	4.16e-13			FAM160B1	0.376256	4.34539e-10	7.04268e-09			HSD17B11	-0.54312	7.62456e-10	1.04131e-08
MRPS16	-0.209047	0.00528103	0.0605275			ARHGAP4	-0.364198	2.73e-14	4.27e-13			CLTB	0.335344	4.37072e-10	7.07899e-09			SLC12A2	0.415735	7.67603e-10	1.04719e-08
PHETA1	-0.446527	0.00528454	0.0605275			WDFY2	0.974074	2.74e-14	4.27e-13			RAP1GAP	-0.475722	4.43177e-10	7.17305e-09			ZNF101	0.352373	7.6779e-10	1.04719e-08
CLEC19A	2.71056	0.00529667	1			RECQL	0.37345	2.79e-14	4.35e-13			SCG3	0.943963	4.43983e-10	7.1813e-09			DNAJA2	0.256276	7.7373e-10	1.05458e-08
SLC44A5	-0.351488	0.0053286	0.0609891			MGRN1	-0.505453	2.89e-14	4.5e-13			DPH5	-0.416829	4.60971e-10	7.45108e-09			GPR155	0.661256	7.88836e-10	1.07445e-08
ZPR1	0.230155	0.00534122	0.0610702			PYGB	-0.275709	2.91e-14	4.53e-13			MRPL9	-0.470733	4.62468e-10	7.47028e-09			ZNF318	0.299682	7.89491e-10	1.07463e-08
SSNA1	0.320786	0.00534793	0.0610702			ACLY	0.251804	2.91e-14	4.54e-13			ASNSD1	0.283258	4.63119e-10	7.4758e-09			POLR2A	0.331168	7.94355e-10	1.08052e-08
HDAC7	-0.302099	0.00535498	0.0610702			NCLN	-0.372381	3.13e-14	4.87e-13			MSRB2	-0.590879	4.64515e-10	7.49332e-09			PIP4K2B	-0.28405	8.04456e-10	1.09353e-08
MSX1	0.335127	0.00535619	0.0610702			GSK3A	-0.456323	3.15e-14	4.89e-13			SLC19A2	0.394196	4.72872e-10	7.62305e-09			RASSF10	-1.20068	8.32224e-10	1.13053e-08
MYBL1	0.364228	0.00535758	0.0610702			MSLN	-0.343247	3.22e-14	5.01e-13			EVC	-0.58305	4.73446e-10	7.62722e-09			ACTR6	0.496697	8.3549e-10	1.13421e-08
HS6ST2	-0.576462	0.00535834	0.0610702			SLPI	0.323229	3.24e-14	5.03e-13			CLGN	0.526897	4.74616e-10	7.64097e-09			QRICH2	-0.967168	8.36891e-10	1.13535e-08
DBN1	-0.255269	0.00536206	0.0610702			SCG3	1.17974	3.3e-14	5.13e-13			ACYP2	0.408654	4.81461e-10	7.746e-09			CCDC9	0.409543	8.63485e-10	1.17065e-08
AC006011.2	5.13422	0.00541168	1			KANK2	-0.469145	3.33e-14	5.16e-13			GOLT1B	0.409716	4.85802e-10	7.81065e-09			IQCG	0.619882	8.68097e-10	1.17612e-08
ACPP	-1.09328	0.00542223	0.0617122			PCGF1	0.465245	3.34e-14	5.17e-13			LAMA5-AS1	1.16219	4.9496e-10	7.95261e-09			TAX1BP1	0.343743	8.7724e-10	1.18772e-08
CRYBB2P1	0.318774	0.00545569	0.0620493			ERGIC2	0.442882	3.47e-14	5.37e-13			SEC24C	0.273082	5.06904e-10	8.1391e-09			WDR83	0.500294	8.95461e-10	1.21158e-08
RNF144B	-0.278921	0.0054839	0.0623265			PFDN5	-0.265172	3.48e-14	5.38e-13			AIG1	-0.449029	5.0862e-10	8.16122e-09			KPNA4	0.325065	9.04977e-10	1.22298e-08
CRIP1	-0.567765	0.00550391	0.06251			SFN	0.69183	3.49e-14	5.39e-13			SNHG7	-0.408929	5.13288e-10	8.23066e-09			PTMS	-0.351008	9.0509e-10	1.22298e-08
TSPAN15	-0.405129	0.00552118	0.0626549			ORMDL2	0.581157	3.54e-14	5.48e-13			ZNF354C	-0.741305	5.14692e-10	8.24771e-09			RBM42	0.300957	9.16015e-10	1.23692e-08
SMIM29	0.303328	0.0055244	0.0626549			ZNF138	0.583011	3.55e-14	5.48e-13			GRAMD2A	-0.837499	5.15256e-10	8.25127e-09			ADNP2	0.323347	9.19223e-10	1.24043e-08
KDM6B	0.285811	0.00555555	0.0629642			PSMD4	0.244074	3.57e-14	5.51e-13			NUF2	-0.444379	5.17634e-10	8.28386e-09			DROSHA	0.323879	9.27683e-10	1.25102e-08
CPNE3	-0.278804	0.00556513	0.0630287			HOXA-AS2	-0.862164	3.61e-14	5.57e-13			LAMB2	-0.331754	5.42647e-10	8.67841e-09			MYLK	-0.306165	9.50324e-10	1.2807e-08
ARL1	-0.251671	0.00560443	0.0634295			MMACHC	-0.641283	3.71e-14	5.72e-13			FUCA1	0.437777	5.56104e-10	8.88773e-09			NIN	-0.471453	9.83918e-10	1.3251e-08
GLIS2	-0.32701	0.00561128	0.0634626			RAB36	-0.899351	3.81e-14	5.88e-13			ENAH	0.29819	5.58451e-10	8.91935e-09			TXN	0.264953	9.91878e-10	1.33494e-08
SDC1	-0.368933	0.00564651	0.0638166			C5orf51	0.369885	3.94e-14	6.07e-13			SLC39A8	0.361368	5.59324e-10	8.92738e-09			TOB1	0.427729	1.00854e-09	1.35647e-08
PTP4A3	-0.335086	0.00565477	0.0638654			IQCE	-0.672291	4.15e-14	6.38e-13			DDX56	0.335977	5.65473e-10	9.01957e-09			SEPHS2	0.279469	1.01782e-09	1.36805e-08
TMEM79	0.278413	0.00567624	0.0640632			GRIK2	-1.02351	4.15e-14	6.38e-13			ZNF623	-0.382352	5.75228e-10	9.16912e-09			DAGLA	-0.570045	1.02786e-09	1.38063e-08
SLC16A5	-0.260365	0.00571063	0.0644066			RAI2	-0.656831	4.18e-14	6.42e-13			TXLNA	0.256212	5.78556e-10	9.21609e-09			SGTB	0.779701	1.02974e-09	1.38224e-08
CCT5	0.206833	0.00572297	0.0645008			CDC27	0.370414	4.18e-14	6.42e-13			MDM2	0.436892	5.80036e-10	9.23358e-09			AP000880.1	1.80665	1.05158e-09	1.41063e-08
PAK1IP1	0.271023	0.00574373	0.0646898			SMTN	0.456814	4.25e-14	6.52e-13			IQSEC1	-0.407381	5.83902e-10	9.28901e-09			ARF1	0.265484	1.05545e-09	1.41488e-08
GALNT18	0.489399	0.0057728	0.0649303			LMNB2	-0.354628	4.5e-14	6.9e-13			SULF1	-0.311264	5.86638e-10	9.32638e-09			SLC16A2	-0.793966	1.05883e-09	1.41848e-08
SNX17	-0.245587	0.00577309	0.0649303			SOAT1	0.320669	4.67e-14	7.15e-13			NFAT5	0.495202	5.8851e-10	9.34999e-09			EDEM1	0.383317	1.088e-09	1.4566e-08
ALDH1L2	0.862377	0.00579037	0.0650795			IGHE	2.39901	4.68e-14	7.17e-13			METRNL	0.4289	5.93766e-10	9.42731e-09			KIF14	0.401451	1.09067e-09	1.45921e-08
AC132872.2	-1.62378	0.00579675	1			SEPHS2	0.353602	4.84e-14	7.41e-13			SPATS2L	-0.428929	6.06043e-10	9.6159e-09			KLHL35	-0.484183	1.1186e-09	1.4956e-08
LINC01128	0.296676	0.0057976	0.065096			ZNF362	-0.796142	4.94e-14	7.56e-13			TRAFD1	0.349217	6.12673e-10	9.71473e-09			BRD3OS	-0.521128	1.11995e-09	1.49642e-08
COG2	-0.292424	0.00580386	0.065096			LRRN2	-0.688634	4.97e-14	7.6e-13			PAFAH2	-0.429552	6.32104e-10	1.00163e-08			DUSP14	0.488376	1.13759e-09	1.51899e-08
PIM3	0.314661	0.00580534	0.065096			VAPA	0.359993	5e-14	7.64e-13			TMEM139	-0.413943	6.33312e-10	1.00267e-08			ZNF514	-0.518258	1.1435e-09	1.5259e-08
ITGA5	-0.581925	0.00580791	0.065096			TFEB	-0.736654	5.05e-14	7.71e-13			ENHO	-0.984795	6.33593e-10	1.00267e-08			ZNF622	0.309094	1.16287e-09	1.55072e-08
AL035071.1	0.588107	0.00581427	0.0651223			CEBPG	0.397009	5.13e-14	7.83e-13			CDK6	0.416885	6.54733e-10	1.03545e-08			CHD6	-0.326424	1.1714e-09	1.56108e-08
IPP	-0.282476	0.0058647	0.0656417			AVPI1	0.414345	5.22e-14	7.96e-13			KLHL29	-0.41297	6.59233e-10	1.04188e-08			U2AF2	0.289074	1.20777e-09	1.60849e-08
GRAMD1C	-0.814106	0.00589179	0.0658994			RPS6KA5	0.885049	5.26e-14	8.01e-13			BCCIP	0.286702	6.73088e-10	1.06308e-08			DLG3	-0.325212	1.21098e-09	1.61171e-08
RAI14	-0.24122	0.00592483	0.0662233			SF3B3	-0.358869	5.29e-14	8.06e-13			VPS50	-0.42974	6.78511e-10	1.07095e-08			MXD4	-0.309611	1.21277e-09	1.61303e-08
ARHGEF28	-0.306316	0.00593324	0.0662715			NFKBIZ	0.774554	5.33e-14	8.12e-13			NEURL1	-0.428671	6.87723e-10	1.08478e-08			TMEM108	1.12003	1.22455e-09	1.62765e-08
AC091576.1	1.66813	0.0059441	1			GPR108	0.42345	5.43e-14	8.25e-13			SRPRA	0.374746	7.09241e-10	1.11799e-08			NPTXR	-0.876954	1.26095e-09	1.67494e-08
S1PR2	0.246118	0.00594423	0.0663486			RBM19	0.477325	5.52e-14	8.39e-13			MEA1	0.335536	7.13307e-10	1.12367e-08			SUSD2	-0.706315	1.29862e-09	1.72385e-08
AC105285.1	-0.88712	0.00595603	0.0664094			DIAPH3	0.527463	5.56e-14	8.44e-13			ATMIN	0.327592	7.15654e-10	1.12663e-08			PDE6B	-0.594483	1.30556e-09	1.73107e-08
PPP1R15B	0.284155	0.00595788	0.0664094			UBTF	-0.418229	5.56e-14	8.44e-13			DIS3L	-0.365024	7.23656e-10	1.13818e-08			TBC1D8B	-0.760819	1.30576e-09	1.73107e-08
KIAA1147	-0.216091	0.00596588	0.0664529			MELTF	-0.734578	5.57e-14	8.45e-13			P4HB	0.309584	7.23997e-10	1.13818e-08			ABCF1	0.264272	1.32327e-09	1.75314e-08
AC254633.1	5.11728	0.00597082	1			SPRYD7	0.854662	5.66e-14	8.58e-13			RBBP5	-0.367354	7.24403e-10	1.13818e-08			AAR2	-0.38509	1.33826e-09	1.77184e-08
GPX1P1	0.86485	0.00600182	0.0668073			SUPT6H	0.305241	5.69e-14	8.62e-13			FRZB	-0.290803	7.30573e-10	1.14713e-08			TAF6	-0.472284	1.35179e-09	1.78859e-08
PIK3CD	-0.389646	0.00602992	0.067074			AC005336.1	0.963469	5.7e-14	8.63e-13			F3	1.00473	7.32703e-10	1.14973e-08			NDUFC2	-0.547363	1.37771e-09	1.82171e-08
ORC1	0.230616	0.00603569	0.0670922			ABL2	0.349626	5.73e-14	8.67e-13			TGOLN2	0.264145	7.45378e-10	1.16885e-08			PSMG2	-0.45695	1.38379e-09	1.82857e-08
CRISPLD1	0.345674	0.00605879	0.0673028			AP000880.1	1.92856	5.73e-14	8.67e-13			POLG	0.364472	7.47012e-10	1.17066e-08			RPL15	-0.243099	1.39228e-09	1.83858e-08
BCAT2	-0.314223	0.00606813	0.0673238			PEX6	-0.468302	5.79e-14	8.75e-13			CELF1	0.24603	7.66307e-10	1.20012e-08			RLIM	0.361665	1.41297e-09	1.8647e-08
ANO1	1.1764	0.00606899	0.0673238			AC005261.1	0.726593	6e-14	9.06e-13			SURF4	0.263698	7.70432e-10	1.2058e-08			NIPSNAP1	-0.333236	1.43538e-09	1.8919e-08
DLEU7	-2.79565	0.00607243	1			ABHD17C	-0.616254	6.13e-14	9.25e-13			TMEM41B	0.429878	7.72914e-10	1.2089e-08			HS6ST1	-0.405448	1.43544e-09	1.8919e-08
REPS2	0.470801	0.00609739	0.0675927			YIPF6	0.394943	6.3e-14	9.5e-13			VDAC3	0.300605	7.74061e-10	1.20991e-08			FNDC4	-0.975732	1.47292e-09	1.94005e-08
SYCP2	-0.435732	0.00612104	0.0678084			COX7A2L	-0.420396	6.4e-14	9.64e-13			NES	-0.888054	7.80106e-10	1.21857e-08			CHMP1B	0.415218	1.4775e-09	1.94482e-08
PEG10	0.209291	0.00613282	0.0678924			DDX24	0.319904	6.44e-14	9.7e-13			TFG	0.288902	7.99523e-10	1.24809e-08			AC093001.1	2.08643	1.49385e-09	1.96508e-08
KIF3C	-0.39727	0.00614812	0.0679985			NXN	-0.332653	6.49e-14	9.77e-13			SLC39A7	0.296735	8.1236e-10	1.26731e-08			BCAT2	-0.49429	1.54133e-09	2.02622e-08
EFHC1	-0.279495	0.00615078	0.0679985			BCAS4	-0.671339	6.66e-14	1e-12			PDCL2	-1.19361	8.20714e-10	1.27952e-08			DKC1	0.273298	1.56992e-09	2.06247e-08
MELTF	-0.373947	0.00616092	0.0680641			BCL6	0.723047	6.74e-14	1.01e-12			BCAM	-0.335473	8.21242e-10	1.27952e-08			CYP2U1	-0.701373	1.5731e-09	2.06532e-08
PLCD1	0.417185	0.00616824	0.0680985			TGFBR3	-0.445172	6.8e-14	1.02e-12			PTPN14	0.292639	8.24011e-10	1.283e-08			TMEM189	0.307874	1.58845e-09	2.08412e-08
AC011447.2	5.0692	0.00616846	1			TMED10	0.317059	6.81e-14	1.02e-12			SMTN	0.413637	8.27907e-10	1.28824e-08			RTF2	0.273221	1.6108e-09	2.11209e-08
CASC10	-0.276829	0.00617484	0.068125			TAF6	-0.492496	7.1e-14	1.07e-12			PACSIN3	-0.378994	8.36946e-10	1.30101e-08			TUB	-0.440796	1.63787e-09	2.1462e-08
RASGRP1	0.809746	0.00617942	0.0681254			NAPEPLD	-0.474641	7.12e-14	1.07e-12			RYK	-0.33601	8.37188e-10	1.30101e-08			DOK7	-0.771452	1.63974e-09	2.14727e-08
TAP2	0.259888	0.00618328	0.0681254			BCR	-0.363119	7.28e-14	1.09e-12			ABL2	0.313247	8.5936e-10	1.3346e-08			GUCY1B1	0.855136	1.65558e-09	2.16662e-08
C5orf30	-0.251199	0.00619625	0.0682219			FBXO17	-0.653355	7.31e-14	1.09e-12			PPP2R5B	-0.510521	8.71996e-10	1.35336e-08			MACROD1	-0.596251	1.6843e-09	2.20279e-08
TAF6	-0.285286	0.00621133	0.0683415			DLGAP1-AS2	0.81249	7.44e-14	1.11e-12			SMCR8	0.337289	8.82868e-10	1.36935e-08			MYL6B	0.303832	1.68553e-09	2.20298e-08
AL031123.2	0.446548	0.00622532	0.0684062			MAP2K3	0.430065	7.98e-14	1.19e-12			INO80D	0.546127	8.98422e-10	1.39258e-08			RAB15	-0.760666	1.71599e-09	2.24136e-08
HSPE1	0.21988	0.00622565	0.0684062			TMCO4	-0.718242	8.13e-14	1.21e-12			QSOX1	0.339446	9.08487e-10	1.40728e-08			SRRT	0.290119	1.7196e-09	2.24463e-08
REL	0.307645	0.00623151	0.0684241			DUSP14	0.533727	8.3e-14	1.24e-12			IQCG	0.571338	9.14849e-10	1.41623e-08			NAGK	0.350912	1.74161e-09	2.2719e-08
NMRAL2P	1.21593	0.00624456	0.0684979			SLC26A7	-0.917364	8.34e-14	1.24e-12			MAPK9	0.302647	9.15588e-10	1.41646e-08			XRCC6	0.254947	1.77931e-09	2.31777e-08
ACSL1	0.254436	0.00624667	0.0684979			ZDHHC2	-0.455405	8.57e-14	1.28e-12			TRIM16L	0.507534	9.3587e-10	1.44692e-08			SLC23A2	-0.606324	1.78009e-09	2.31777e-08
TTC23	-0.4002	0.00625751	0.0685703			CLPTM1L	0.237521	8.68e-14	1.29e-12			CRYZ	-0.288988	9.39965e-10	1.45232e-08			SLAIN1	-0.48776	1.78019e-09	2.31777e-08
URB2	0.230883	0.00627159	0.0686782			VARS	-0.36636	8.68e-14	1.29e-12			STAC2	-1.50331	9.46808e-10	1.46196e-08			FUCA2	0.280901	1.80209e-09	2.3448e-08
LANCL1	-0.264996	0.0062864	0.0687938			PSMG2	-0.527352	8.69e-14	1.29e-12			ANKRD50	0.387353	9.55048e-10	1.47293e-08			DBP	-0.711658	1.84139e-09	2.3944e-08
MDM4	0.308169	0.0062976	0.0688699			TSN	-0.320561	8.72e-14	1.3e-12			HS6ST1	-0.33389	9.55132e-10	1.47293e-08			CTNNBIP1	-0.469105	1.86799e-09	2.42744e-08
SNHG9	1.05865	0.00630195	0.068871			RAI1	-0.504712	8.82e-14	1.31e-12			DHCR24	-0.266225	9.78476e-10	1.50796e-08			ARL16	0.329913	1.87952e-09	2.44086e-08
PTK2B	-0.329573	0.00631624	0.0689445			CLDN3	-0.437454	8.92e-14	1.32e-12			DNAJC8	0.274745	9.83949e-10	1.51543e-08			UBB	0.332907	1.89696e-09	2.46039e-08
OGFRL1	-0.538228	0.00631718	0.0689445			LIMK2	-0.395712	8.97e-14	1.33e-12			PPIP5K2	-0.373886	9.91947e-10	1.52678e-08			ZNF611	0.605641	1.89698e-09	2.46039e-08
ZNF497	-0.611437	0.00634319	0.0691635			SCAPER	0.608722	9.01e-14	1.34e-12			CNTN6	-1.03985	1.01242e-09	1.5573e-08			DNAJC8	0.283718	1.89971e-09	2.46236e-08
CDH1	0.209274	0.00634579	0.0691635			ORC6	0.383535	9.06e-14	1.34e-12			NDUFA5	-0.440828	1.02701e-09	1.57874e-08			IDH3B	0.319797	1.90138e-09	2.46296e-08
RF02250	-2.55186	0.00634589	1			RASL10B	-1.05885	9.4e-14	1.39e-12			ZSWIM8	0.328683	1.03138e-09	1.58445e-08			FBXO17	-0.566191	1.96379e-09	2.54176e-08
LARP1B	0.284938	0.00641598	0.0698816			GPD2	0.327999	9.54e-14	1.41e-12			PDPN	-0.430954	1.07565e-09	1.65141e-08			XKR7	1.01727	1.9647e-09	2.54176e-08
CDKN2B	-0.279332	0.00642151	0.0698949			SMG1P7	0.958001	9.64e-14	1.43e-12			IRGQ	0.362309	1.08162e-09	1.65951e-08			EIF5A	0.279914	2.00068e-09	2.58665e-08
SMIM13	-0.309038	0.00643503	0.0699777			UBXN8	0.418966	9.68e-14	1.43e-12			ANKFN1	2.96488	1.08693e-09	1.6666e-08			CNIH4	-0.365442	2.01568e-09	2.6044e-08
PRKDC	0.200142	0.00643843	0.0699777			RAD18	0.561438	9.79e-14	1.45e-12			CREB1	-0.450182	1.10458e-09	1.6926e-08			PCGF1	0.431308	2.03181e-09	2.62358e-08
ZNF862	-0.299562	0.00644208	0.0699777			TRABD	-0.456324	9.93e-14	1.47e-12			SETX	0.296217	1.108e-09	1.69676e-08			GPC1	-0.426001	2.03553e-09	2.62671e-08
THY1	0.549957	0.0064537	0.0700247			REEP5	-0.322428	1.01e-13	1.49e-12			BIRC3	0.592638	1.1163e-09	1.70838e-08			RPL29	-0.323707	2.0489e-09	2.64229e-08
CEBPA	-0.928252	0.00645504	0.0700247			FAM214B	0.580321	1.03e-13	1.52e-12			RNF168	0.39174	1.13101e-09	1.7298e-08			NR2F1-AS1	-0.99912	2.05533e-09	2.64891e-08
GDF6	-1.54043	0.0064738	1			PLEKHA1	-0.353374	1.03e-13	1.52e-12			ZDHHC1	-0.623276	1.13443e-09	1.73394e-08			WDFY2	0.870814	2.08235e-09	2.68203e-08
AC141586.1	0.403279	0.00647447	0.0701885			MAZ	-0.536511	1.06e-13	1.56e-12			RP2	0.40799	1.14114e-09	1.74193e-08			ABCB6	0.840839	2.1077e-09	2.71296e-08
ZNF395	-0.263426	0.00648636	0.0702703			WASF1	-0.505814	1.06e-13	1.57e-12			RAD23B	0.28069	1.14156e-09	1.74193e-08			ABL2	0.341014	2.19434e-09	2.8227e-08
CASKIN2	-0.333122	0.00651869	0.0705337			MAGIX	0.925055	1.08e-13	1.59e-12			FAF2	0.254883	1.14182e-09	1.74193e-08			IRAK3	1.73836	2.20304e-09	2.8321e-08
ZC3H12A	0.301887	0.00651937	0.0705337			GOLM1	-0.3512	1.11e-13	1.63e-12			EPHX4	-0.441181	1.14574e-09	1.74681e-08			ATP6V0A2	0.399919	2.20692e-09	2.8353e-08
PTRH2	0.251107	0.00655395	0.0708582			MINDY1	-0.565793	1.13e-13	1.67e-12			SUGP2	0.249249	1.15661e-09	1.76226e-08			FLYWCH1	0.349132	2.26066e-09	2.90251e-08
GABPB2	-0.428799	0.00656155	0.0708582			AC004835.1	4.02523	1.14e-13	1.67e-12			PEMT	-0.569255	1.19124e-09	1.81388e-08			EFCAB12	1.45317	2.29444e-09	2.94221e-08
RAPGEF2	-0.276772	0.00656248	0.0708582			XXYLT1	-0.454765	1.15e-13	1.69e-12			TTC21B	-0.470321	1.1938e-09	1.81664e-08			CREB1	-0.479128	2.29447e-09	2.94221e-08
VWA8	-0.363249	0.00656719	0.0708618			VDAC2	-0.245138	1.15e-13	1.69e-12			SLC1A2	2.60716	1.22044e-09	1.856e-08			TANGO2	0.628124	2.29867e-09	2.94574e-08
BTRC	-0.254448	0.00658308	0.0709805			MFN1	0.297328	1.15e-13	1.69e-12			ARHGEF11	-0.305859	1.22244e-09	1.85788e-08			CD99	-0.473858	2.31315e-09	2.96243e-08
RDH5	-0.917075	0.00658695	0.0709805			NBL1	-0.541952	1.16e-13	1.7e-12			RBBP7	0.260943	1.22597e-09	1.86116e-08			VDAC3	0.292659	2.33961e-09	2.99444e-08
CD40	0.261529	0.0065961	0.0710319			SLC25A39	-0.322911	1.2e-13	1.76e-12			GPC1	-0.408552	1.22614e-09	1.86116e-08			ARRB2	0.344315	2.38537e-09	3.05109e-08
MAB21L4	-2.01109	0.00661188	1			SLC39A9	0.328689	1.21e-13	1.77e-12			DMAC1	-0.461908	1.2372e-09	1.87676e-08			ARMC5	0.540732	2.38905e-09	3.05387e-08
ERMAP	-0.405408	0.00661904	0.0712316			CREB3	0.347596	1.22e-13	1.78e-12			HSPA1L	0.678346	1.24656e-09	1.88977e-08			LYAR	0.402034	2.39429e-09	3.05865e-08
PSMD11	0.237493	0.00664123	0.071377			OS9	0.273366	1.25e-13	1.82e-12			MMP2	-0.8695	1.25293e-09	1.89825e-08			TTC26	-0.968657	2.43298e-09	3.10613e-08
PLA2R1	-0.491711	0.00664136	0.071377			FBXO45	0.341005	1.27e-13	1.85e-12			PRKDC	0.251146	1.26294e-09	1.91222e-08			STAMBP	0.32286	2.44958e-09	3.12537e-08
OVAAL	3.22826	0.00666866	1			PPP4R3B	0.312527	1.27e-13	1.85e-12			ELK4	0.386247	1.26531e-09	1.9146e-08			GTPBP4	0.249794	2.47016e-09	3.14965e-08
MSRB1	0.286149	0.00667184	0.0716501			GREB1	1.36578	1.34e-13	1.95e-12			BCKDK	-0.497957	1.27107e-09	1.92212e-08			MAGIX	0.823971	2.47756e-09	3.1571e-08
AP000662.1	-0.992448	0.00667561	0.0716501			MAGEH1	0.449303	1.36e-13	1.98e-12			SEMA6B	-0.897138	1.28728e-09	1.94541e-08			NAP1L3	-0.551693	2.51326e-09	3.20059e-08
CDH20	5.09122	0.006682	1			HSPA1L	0.802515	1.43e-13	2.09e-12			SMC2	-0.341011	1.30569e-09	1.972e-08			SPINT2	0.251447	2.54366e-09	3.23729e-08
TSPYL4	0.228566	0.00670016	0.071866			RPA2	0.296488	1.45e-13	2.11e-12			CRY1	0.430126	1.33398e-09	2.01268e-08			DDX56	0.312241	2.59606e-09	3.3019e-08
LYPD1	-1.25476	0.00670493	0.0718695			HSPA14	0.376726	1.46e-13	2.12e-12			LIMS2	-0.658931	1.33429e-09	2.01268e-08			SFN	0.632465	2.6214e-09	3.33206e-08
CGNL1	-0.296044	0.00670973	0.0718735			MRFAP1	-0.294879	1.46e-13	2.13e-12			CD34	-0.562803	1.34099e-09	2.02152e-08			RSPO4	-0.730517	2.64277e-09	3.35713e-08
ALDH2	0.233185	0.00672348	0.0719732			CHST10	-0.58295	1.52e-13	2.21e-12			XAB2	0.411657	1.36077e-09	2.05006e-08			BUB1	0.286588	2.68686e-09	3.411e-08
ADIPOQ	-5.07512	0.00673396	1			SLC23A2	-0.610232	1.52e-13	2.21e-12			LINC01936	-0.798754	1.37457e-09	2.06957e-08			LOXL1	-0.725517	2.69213e-09	3.41557e-08
FP565260.3	-0.860942	0.00673672	0.0720674			ISG20	0.529196	1.53e-13	2.22e-12			SLC25A44	0.31564	1.39349e-09	2.09674e-08			LAMB2	-0.340863	2.69395e-09	3.41575e-08
HIST1H2BJ	0.821482	0.00674254	0.072082			TMEM26	-0.620061	1.57e-13	2.27e-12			NXPE3	0.399796	1.41059e-09	2.12115e-08			KCTD13	0.509586	2.70369e-09	3.42596e-08
AC011239.2	5.03239	0.00675186	1			VPS26A	0.35958	1.58e-13	2.29e-12			NOTCH3	-0.677568	1.41374e-09	2.12456e-08			PPIL1	-0.385451	2.7543e-09	3.48792e-08
RAB30	-0.370821	0.00677472	0.0723783			CDC25A	0.491609	1.59e-13	2.3e-12			GLI4	-0.487875	1.41871e-09	2.13071e-08			CKB	-0.487815	2.78622e-09	3.52615e-08
AL139805.1	5.03239	0.00680627	1			TCEANC2	-0.445328	1.64e-13	2.37e-12			FAAP100	-0.425962	1.42927e-09	2.14403e-08			PLEKHB1	-0.7015	2.87451e-09	3.63563e-08
CAT	-0.252996	0.00682254	0.0728412			RPL22	-0.355318	1.66e-13	2.4e-12			PADI2	-0.778979	1.42935e-09	2.14403e-08			SWI5	0.481526	2.90865e-09	3.67652e-08
SH3KBP1	-0.247756	0.00684309	0.0729831			ZNF512B	-0.337536	1.68e-13	2.43e-12			ATP6V0A2	0.363402	1.43117e-09	2.14542e-08			CARHSP1	-0.417344	3.02496e-09	3.81987e-08
RHEB	0.209518	0.00684483	0.0729831			RAD23B	0.307867	1.7e-13	2.46e-12			TAP2	0.369842	1.43566e-09	2.15082e-08			DCAF15	0.33512	3.0258e-09	3.81987e-08
ATG3	0.220636	0.00685045	0.0729949			HINT1	0.272711	1.71e-13	2.47e-12			CDC23	0.305967	1.44893e-09	2.16935e-08			ANLN	0.334042	3.02902e-09	3.82155e-08
CFL2	-0.330992	0.00686941	0.0731113			ZER1	-0.528247	1.72e-13	2.49e-12			ISM2	-1.42904	1.45028e-09	2.17003e-08			CHURC1	-0.471091	3.06535e-09	3.865e-08
AC012123.1	0.463999	0.0068704	0.0731113			SMARCD1	-0.327061	1.73e-13	2.49e-12			ALCAM	0.342073	1.46471e-09	2.19027e-08			FUNDC1	0.360597	3.12687e-09	3.94013e-08
YBX1P1	0.258279	0.00688235	0.0731904			WSB2	0.308082	1.73e-13	2.5e-12			SLC25A51	0.559944	1.47384e-09	2.20085e-08			RPARP-AS1	-0.543834	3.13769e-09	3.95132e-08
ZNF579	-0.395561	0.0068899	0.0732227			ZNF503	0.35478	1.74e-13	2.5e-12			ABR	-0.826435	1.47406e-09	2.20085e-08			TENM3	0.330748	3.20489e-09	4.03345e-08
GOLGA7	0.241248	0.00692255	0.0735215			CSNK1A1	0.305374	1.75e-13	2.52e-12			ZNF362	-0.590309	1.47452e-09	2.20085e-08			RAB36	-0.771299	3.22958e-09	4.06201e-08
PPME1	0.224435	0.00693049	0.0735575			TRNAU1AP	0.456811	1.75e-13	2.52e-12			PLEKHH3	0.431012	1.49498e-09	2.23001e-08			SLC12A1	-0.928784	3.29743e-09	4.14479e-08
UHRF1BP1	-0.261823	0.00694074	0.0736094			CTBP1-DT	-0.638943	1.77e-13	2.54e-12			MAP7D2	-0.357386	1.51362e-09	2.25642e-08			MSRB2	-0.571571	3.32941e-09	4.1824e-08
LRFN3	-0.318869	0.00694445	0.0736094			FEM1C	0.377343	1.78e-13	2.56e-12			RPA2	0.275376	1.52915e-09	2.27817e-08			CELF1	0.237302	3.33678e-09	4.18908e-08
PLOD3	0.271148	0.00695305	0.0736524			ADNP2	0.32812	1.78e-13	2.56e-12			FBXO17	-0.508324	1.55173e-09	2.30979e-08			ASRGL1	0.588658	3.36018e-09	4.21586e-08
CYBRD1	-0.260902	0.00696362	0.0737161			FOCAD	0.589072	1.82e-13	2.62e-12			CRBN	-0.442707	1.55229e-09	2.30979e-08			ITPR1	1.02912	3.3706e-09	4.22632e-08
TACSTD2	1.18421	0.00696828	0.0737173			DKC1	0.288521	1.83e-13	2.62e-12			KDM2A	0.275396	1.56529e-09	2.32771e-08			SLC4A2	-0.284375	3.4016e-09	4.26257e-08
NCOA5	-0.271389	0.00698507	0.0738467			WWC1	-0.296855	1.85e-13	2.65e-12			PPFIA2	-1.20216	1.56966e-09	2.33277e-08			HJURP	0.41052	3.42201e-09	4.2855e-08
MXRA8	-0.511485	0.00700922	0.0740537			CIAO2B	0.322986	1.88e-13	2.69e-12			SNHG4	-0.28705	1.59664e-09	2.37141e-08			SLC39A8	0.406928	3.46894e-09	4.34161e-08
TGFBR3	-0.232917	0.00703261	0.074229			HERC5	0.415251	1.89e-13	2.71e-12			BTRC	-0.372889	1.63278e-09	2.42255e-08			CTDSPL	-0.404678	3.50657e-09	4.38601e-08
IPO8	-0.249786	0.00703497	0.074229			DNMT1	0.254079	1.9e-13	2.72e-12			TMEM69	-0.352606	1.63308e-09	2.42255e-08			PSEN2	-0.528649	3.51102e-09	4.38888e-08
TCF20	0.209662	0.00707817	0.0745936			PERP	-0.380893	1.92e-13	2.74e-12			ZNF252P	-0.461287	1.64612e-09	2.4404e-08			SMKR1	-0.797111	3.52606e-09	4.40498e-08
AC027796.4	-0.530916	0.00707873	0.0745936			TMEM258	-0.440562	1.94e-13	2.78e-12			MEST	-0.269712	1.65282e-09	2.44882e-08			OGDHL	-0.275386	3.61323e-09	4.51112e-08
PACSIN1	-0.826449	0.00709994	0.0747685			TSC22D1	0.351525	1.96e-13	2.8e-12			CPD	0.315723	1.68285e-09	2.49179e-08			HDAC6	0.325156	3.63237e-09	4.53222e-08
EIF4A1P10	0.383711	0.00712935	0.0750295			SEC24C	0.277769	1.96e-13	2.8e-12			CALCOCO2	0.340311	1.69624e-09	2.51009e-08			SCYL2	0.35866	3.63582e-09	4.53375e-08
JUP	-0.275535	0.00715107	0.0752092			ADD3	-0.367867	1.97e-13	2.81e-12			CAMK1G	5.14626	1.7032e-09	2.51884e-08			MIPEP	-0.637478	3.64235e-09	4.53912e-08
PLSCR4	-0.736294	0.00716926	0.0753368			MON1B	0.353092	1.98e-13	2.82e-12			C9orf78	0.314943	1.70821e-09	2.5247e-08			LZTS2	-0.297689	3.65973e-09	4.55799e-08
ERP29P1	4.5269	0.00717354	1			CKAP4	-0.424913	1.99e-13	2.84e-12			DCAF1	0.316587	1.73972e-09	2.5697e-08			AC010422.8	0.666503	3.70235e-09	4.60825e-08
AL390728.4	0.297127	0.00717636	0.0753368			TMEM109	-0.413098	2.04e-13	2.91e-12			ATG4D	0.341132	1.75639e-09	2.59275e-08			SEMA6B	-0.95734	3.7659e-09	4.68448e-08
TXNIP	-0.200121	0.00717715	0.0753368			PSRC1	-0.407241	2.07e-13	2.95e-12			RBM5	-0.383163	1.76218e-09	2.5997e-08			IL17RC	-0.480617	3.79762e-09	4.72105e-08
RPS21	0.26685	0.00720142	0.0754294			H2AFY	-0.278467	2.08e-13	2.96e-12			RAB15	-0.722457	1.76422e-09	2.60112e-08			EDRF1	0.302487	3.82476e-09	4.7519e-08
GGN	0.472599	0.00720914	0.0754294			ACTB	0.254033	2.24e-13	3.18e-12			RALB	-0.37902	1.76763e-09	2.60456e-08			TYW1	0.403927	3.85739e-09	4.78952e-08
MED10	0.211644	0.00720921	0.0754294			HUS1	0.422468	2.29e-13	3.25e-12			LRRC20	-0.433319	1.7755e-09	2.61316e-08			EFHD1	-1.06446	3.86661e-09	4.79604e-08
NR0B1	-0.444868	0.0072094	0.0754294			NECAB2	2.32119	2.29e-13	3.25e-12			ORC1	0.338276	1.77692e-09	2.61316e-08			ISG20	0.484064	3.86736e-09	4.79604e-08
RMC1	0.242316	0.00721034	0.0754294			RNF168	0.426138	2.3e-13	3.27e-12			PPM1K	0.432287	1.77765e-09	2.61316e-08			FAM69B	-0.680663	3.90279e-09	4.83575e-08
FKTN	-0.425918	0.0072139	0.0754294			UTP14A	-0.293926	2.34e-13	3.31e-12			AGAP1	-0.480584	1.77779e-09	2.61316e-08			TMEM170A	0.582098	3.90533e-09	4.83575e-08
QSOX2	0.249435	0.00724296	0.0756845			SLC25A27	-0.483061	2.34e-13	3.31e-12			ELL2	1.11327	1.78298e-09	2.6192e-08			CCDC151	-0.708265	3.9065e-09	4.83575e-08
CHURC1	-0.300517	0.00725406	0.0757516			RTN4R	-1.16579	2.34e-13	3.31e-12			TBC1D1	-0.507856	1.79229e-09	2.63127e-08			TMEM59L	-1.10985	3.91335e-09	4.84128e-08
AC090227.2	5.2924	0.00726062	1			B4GALT5	0.290934	2.35e-13	3.32e-12			ALDOC	0.365755	1.85196e-09	2.71722e-08			RRAGB	0.436996	3.97898e-09	4.91948e-08
MDGA1	-0.419578	0.00729472	0.076092			FAM92A	-0.583205	2.36e-13	3.34e-12			PLCD1	0.693447	1.86313e-09	2.73194e-08			ARHGEF12	0.288145	4.01353e-09	4.95919e-08
PAK1	-0.255887	0.00729857	0.076092			RBMX	-0.29535	2.4e-13	3.39e-12			COPG1	0.303532	1.91598e-09	2.80775e-08			HSPA1L	0.716998	4.01772e-09	4.96135e-08
SNAPC1	0.385142	0.00730074	0.076092			KIF3C	-0.807668	2.43e-13	3.44e-12			CCNG2	-0.352569	1.9268e-09	2.82189e-08			ATP13A3	0.373603	4.06803e-09	5.02045e-08
USP49	0.241475	0.00732325	0.0762775			DGKZ	-0.419199	2.5e-13	3.53e-12			IER3	0.431275	1.93106e-09	2.82641e-08			GLB1	0.300563	4.11949e-09	5.08087e-08
AC024940.2	0.668062	0.00734004	0.0764034			LMO1	-0.69348	2.52e-13	3.56e-12			ARID3B	0.421628	2.01681e-09	2.95014e-08			DUSP9	-0.669146	4.125e-09	5.08458e-08
CREBL2	-0.325836	0.00735	0.0764579			DAP3	0.286195	2.54e-13	3.59e-12			NSUN4	-0.308738	2.0297e-09	2.9672e-08			RPL22	-0.29988	4.12779e-09	5.08494e-08
AJUBA	-0.220373	0.00736057	0.0765187			PPP2R2C	-0.793354	2.56e-13	3.6e-12			TRMT6	0.343154	2.03162e-09	2.96821e-08			UGGT2	0.402616	4.13427e-09	5.08985e-08
KCTD13	0.279312	0.00736648	0.0765311			C2CD5	-0.543259	2.58e-13	3.63e-12			RSRC1	-0.46926	2.04278e-09	2.98271e-08			KCNQ1	-0.696542	4.17176e-09	5.13291e-08
RNASET2	0.301566	0.00738383	0.076607			ZNF24	0.341255	2.62e-13	3.68e-12			CAVIN2	-0.457738	2.05035e-09	2.99194e-08			ESPN	-0.597281	4.1956e-09	5.15912e-08
CACNB3	-0.371546	0.00738662	0.076607			HLA-A	0.364077	2.65e-13	3.73e-12			RAD18	0.4739	2.07445e-09	3.02529e-08			ZNF664	-0.328388	4.24831e-09	5.22078e-08
KYAT1	0.302408	0.00739173	0.076607			RNF14	0.310935	2.67e-13	3.76e-12			INPP5J	-0.812314	2.0823e-09	3.03491e-08			TPM2	-0.259697	4.26526e-09	5.23845e-08
GAN	0.315529	0.00739269	0.076607			AL591845.1	0.521672	2.88e-13	4.05e-12			ABCF1	0.246767	2.12362e-09	3.09326e-08			P4HA2	0.318681	4.29744e-09	5.27479e-08
UGT2B27P	5.05162	0.0074134	1			LEPR	0.501749	2.88e-13	4.05e-12			CLPTM1L	0.293573	2.17781e-09	3.17029e-08			NDP	6.54667	4.34856e-09	5.33432e-08
SBNO1	0.255062	0.00743218	0.076967			PPP1R12C	-0.537796	2.91e-13	4.08e-12			PPP1R12C	-0.415674	2.18852e-09	3.18396e-08			INSIG1	0.297005	4.43207e-09	5.43283e-08
RAP1GAP	-0.324709	0.00743698	0.0769675			ZNF862	-0.551009	2.93e-13	4.11e-12			CNIH4	-0.327006	2.19341e-09	3.18916e-08			ZNF138	0.506177	4.4342e-09	5.43283e-08
ZNF780B	-0.350969	0.00745374	0.0770917			PRDM9	3.19164	2.93e-13	4.11e-12			LINC01915	-2.80082	2.20816e-09	3.20867e-08			MAP4K2	-0.482634	4.44959e-09	5.44713e-08
CLTRN	0.84608	0.00745969	0.077104			BUB1	0.279505	3.03e-13	4.25e-12			PCDH19	0.681366	2.24155e-09	3.25523e-08			CENPB	-0.352098	4.45122e-09	5.44713e-08
AL512633.1	3.97538	0.00746549	1			ABRAXAS2	-0.574124	3.08e-13	4.32e-12			ZNF280C	0.533649	2.24379e-09	3.25653e-08			C9orf78	0.340464	4.51922e-09	5.52515e-08
PPIAP47	5.08423	0.00748432	1			TRNP1	-0.469406	3.1e-13	4.33e-12			TST	-0.516514	2.25831e-09	3.27564e-08			AC005336.1	0.804947	4.52041e-09	5.52515e-08
KAT14	-0.470958	0.00748443	0.0772528			PMM1	0.489719	3.11e-13	4.35e-12			DAGLA	-0.499041	2.26231e-09	3.27947e-08			PPDPF	-0.403804	4.53006e-09	5.53363e-08
NFIC	0.262081	0.00748805	0.0772528			ETS2	0.377209	3.14e-13	4.39e-12			CCDC57	-0.434188	2.30506e-09	3.33943e-08			PYGL	-0.358806	4.54227e-09	5.54522e-08
CDC123	0.196642	0.00748899	0.0772528			PPP2R5B	-0.596096	3.18e-13	4.44e-12			PTPN1	0.288177	2.31015e-09	3.3448e-08			RNF150	-0.387218	4.63739e-09	5.65795e-08
AL137002.2	-0.609012	0.00749766	0.0772528			AC087741.1	-0.671311	3.22e-13	4.5e-12			GPAT3	0.720264	2.3445e-09	3.3925e-08			TMEM100	-0.773009	4.69436e-09	5.72402e-08
CCNK	0.373854	0.00750062	0.0772528			SH2D6	1.7204	3.24e-13	4.51e-12			FAM131C	-1.48661	2.41102e-09	3.48668e-08			CCDC117	-0.514564	4.76137e-09	5.80226e-08
C1orf52	0.269131	0.00750268	0.0772528			BAP1	0.257856	3.27e-13	4.55e-12			CHODL	0.582159	2.43162e-09	3.51437e-08			CLDND1	0.469968	4.80607e-09	5.85323e-08
RPS15A	0.237262	0.00751341	0.0772722			GALNT5	1.06727	3.28e-13	4.57e-12			OPTN	-0.270298	2.43738e-09	3.51938e-08			EVC	-0.766378	4.83523e-09	5.88522e-08
FBXL16	-0.41298	0.00751456	0.0772722			CNN3	0.274606	3.31e-13	4.61e-12			AHCYL2	0.338764	2.43801e-09	3.51938e-08			TAP2	0.398539	4.91115e-09	5.97406e-08
LDHD	-0.465588	0.00751886	0.0772722			NACC2	-0.59484	3.32e-13	4.62e-12			VMP1	0.252007	2.45686e-09	3.54447e-08			SLC9A3R2	-0.441204	4.92645e-09	5.98909e-08
PPIP5K2	-0.314925	0.00755263	0.0775295			RASSF8	0.516614	3.33e-13	4.63e-12			ZNF570	-0.385537	2.47196e-09	3.56413e-08			PTGES2	-0.408465	4.96059e-09	6.02699e-08
DDIT3	0.296482	0.00755347	0.0775295			TUG1	-0.381972	3.35e-13	4.66e-12			TMEM161A	0.368832	2.47899e-09	3.57204e-08			PMS2P1	0.485698	5.04246e-09	6.12016e-08
LDLRAD1	-2.06513	0.00757741	1			ZNF408	0.450047	3.39e-13	4.7e-12			ARHGEF40	-0.498118	2.4804e-09	3.57204e-08			CBX1	-0.392265	5.04328e-09	6.12016e-08
L1CAM	-0.274191	0.0075823	0.0777762			CTDSPL	-0.439531	3.45e-13	4.78e-12			CXorf40B	0.439621	2.49943e-09	3.5973e-08			LSMEM1	0.974795	5.13003e-09	6.22172e-08
BOLA3	-0.389133	0.00760384	0.0779036			KCMF1	0.320882	3.5e-13	4.86e-12			RNF150	-0.355567	2.51516e-09	3.61779e-08			ACP6	-0.457034	5.19536e-09	6.2972e-08
AHNAK	-0.199445	0.00760434	0.0779036			IFT22	-0.360175	3.53e-13	4.89e-12			ZNF862	-0.433332	2.58706e-09	3.71899e-08			FAAP100	-0.446046	5.21448e-09	6.31662e-08
COL9A1	0.378899	0.00761748	0.077945			PAIP2	0.337887	3.54e-13	4.9e-12			FOXRED2	-0.368663	2.59487e-09	3.72801e-08			PACS1	-0.307923	5.28637e-09	6.3999e-08
ZFP36	0.295675	0.007618	0.077945			PHLDB1	-0.352748	3.55e-13	4.92e-12			AL354872.2	1.89742	2.60024e-09	3.7335e-08			RARS2	0.382157	5.36175e-09	6.48731e-08
SELENOS	0.213164	0.00762396	0.0779568			ARAP1	-0.362501	3.67e-13	5.08e-12			IFT22	-0.352245	2.62473e-09	3.76642e-08			RPS6KA5	0.74313	5.38588e-09	6.51263e-08
BHLHB9	-0.399391	0.00763521	0.0780226			FILIP1	0.674256	3.68e-13	5.1e-12			NLGN2	-0.321671	2.66443e-09	3.82112e-08			RPS27A	-0.208906	5.41562e-09	6.54471e-08
LURAP1	-1.15375	0.00766936	0.0783222			HBS1L	0.356621	3.7e-13	5.12e-12			RINT1	-0.415298	2.66975e-09	3.82649e-08			FUCA1	0.431233	5.47777e-09	6.61589e-08
MISP	-0.330306	0.00768162	0.0783742			AQP6	-0.865287	3.76e-13	5.19e-12			KLHL23	-0.460962	2.672e-09	3.82744e-08			NBEAL2	-0.541135	5.51482e-09	6.65669e-08
ABCA1	-0.3356	0.00768413	0.0783742			PRMT1	0.314314	3.77e-13	5.21e-12			RLIM	0.33436	2.73183e-09	3.91082e-08			RNF170	-0.600076	5.53031e-09	6.67143e-08
GSN	-0.318164	0.00771457	0.0786352			AP1AR	0.387102	3.88e-13	5.35e-12			SNRNP25	0.35212	2.75586e-09	3.94289e-08			SEMA6D	-0.703328	5.66303e-09	6.82749e-08
ZNF606	-0.465672	0.00772996	0.0786953			NAGK	0.338123	3.88e-13	5.35e-12			LMO7	-0.38716	2.84428e-09	4.06686e-08			RNF180	-0.544082	5.78246e-09	6.96736e-08
ATP2A2	0.194586	0.00773468	0.0786953			KIF2C	0.276737	3.91e-13	5.39e-12			TMEM267	-0.439045	2.84588e-09	4.06686e-08			TMEM258	-0.379792	5.85204e-09	7.04702e-08
IRF7	0.513851	0.00773503	0.0786953			POLRMT	0.318683	3.92e-13	5.4e-12			NPAS3	-0.514674	2.84937e-09	4.06944e-08			DUSP3	-0.353587	6.02543e-09	7.25153e-08
AQP2	-0.865426	0.00775094	0.0787865			TRAP1	-0.363168	3.99e-13	5.49e-12			RGS9	-0.675318	2.88422e-09	4.11679e-08			MAL	-0.278417	6.11677e-09	7.3571e-08
MSLN	-0.313428	0.00775371	0.0787865			GOLGB1	0.259651	4.08e-13	5.61e-12			ZNF280D	-0.563973	2.90406e-09	4.14266e-08			RAB3A	0.668101	6.30055e-09	7.57368e-08
NRP1	1.37738	0.00777292	0.0788313			DCTN6	0.594899	4.1e-13	5.63e-12			EPHB4	-0.302773	2.9321e-09	4.18018e-08			MAP2K3	0.417004	6.35288e-09	7.63208e-08
GEMIN8P4	0.398423	0.00777443	0.0788313			ZNF460	1.41888	4.19e-13	5.76e-12			ZER1	-0.442646	2.95661e-09	4.21264e-08			APBA2	-0.542301	6.39407e-09	7.67703e-08
ANKRD13A	-0.221737	0.00777494	0.0788313			MYSM1	0.346725	4.26e-13	5.85e-12			SSSCA1	0.444258	2.97004e-09	4.22928e-08			TMEM139	-0.524813	6.46385e-09	7.75623e-08
NOLC1	0.194206	0.00777758	0.0788313			VSIG10	-0.805701	4.33e-13	5.95e-12			IDS	0.333696	3.0552e-09	4.34799e-08			SYNPO	-0.481577	6.47959e-09	7.77054e-08
SLC4A11	-0.270181	0.00779054	0.0789081			MIB1	0.378183	4.34e-13	5.96e-12			GRPEL2	0.381075	3.06245e-09	4.35575e-08			TRMT2B	0.310297	6.52033e-09	7.8148e-08
ALAS1	0.241617	0.00779722	0.0789081			TMEM59L	-0.9843	4.37e-13	5.99e-12			ZNF408	0.416588	3.0931e-09	4.39675e-08			FGFR1	-0.858948	6.54402e-09	7.83859e-08
ANPEP	3.8663	0.00779977	0.0789081			ZNF622	0.303849	4.44e-13	6.08e-12			SPEF2	-1.10686	3.10072e-09	4.405e-08			POLG	0.366475	6.5934e-09	7.89308e-08
RBMS2	-0.264432	0.00784319	0.0792979			SCNM1	0.347301	4.51e-13	6.18e-12			EML1	-0.694791	3.15391e-09	4.47793e-08			TMED10	0.282447	6.6139e-09	7.91297e-08
NUP160	0.20898	0.00784838	0.0793009			ALS2	0.464112	4.64e-13	6.35e-12			CASTOR3	-0.379791	3.17186e-09	4.50076e-08			PNN	0.265993	6.6651e-09	7.96956e-08
AC091806.1	-0.74408	0.0078604	0.0793729			DST	0.769629	4.73e-13	6.47e-12			EDRF1	0.293574	3.18799e-09	4.52099e-08			NUFIP2	0.332441	6.78057e-09	8.10286e-08
LINC00624	0.722722	0.00787587	0.0794796			PRKAR1B	-0.505162	4.85e-13	6.63e-12			TNRC6B	0.455676	3.28562e-09	4.65671e-08			SMG1P7	0.776479	6.80919e-09	8.13229e-08
CREB5	-0.785658	0.00789227	0.0795783			FAM49B	0.342533	4.9e-13	6.69e-12			PERP	-0.316538	3.3005e-09	4.67507e-08			LHX1-DT	-0.579233	6.92223e-09	8.26245e-08
ELAVL2	0.419109	0.00789547	0.0795783			NT5DC3	0.736194	4.9e-13	6.69e-12			METTL23	-0.357887	3.30608e-09	4.68022e-08			MRFAP1L1	-0.313049	7.05004e-09	8.41007e-08
PDCD5	0.215072	0.00790415	0.0796163			SFXN3	-0.614755	5.18e-13	7.07e-12			CYP2U1	-0.622706	3.30955e-09	4.68239e-08			ZFP36L1	-0.272361	7.11566e-09	8.48338e-08
ATP6V0B	0.225227	0.00791668	0.0796689			HUWE1	0.291932	5.24e-13	7.14e-12			KDELC1	0.314732	3.31891e-09	4.69288e-08			ZNF239	-0.459602	7.28797e-09	8.68373e-08
OIT3	-0.858629	0.00791921	0.0796689			PIAS3	-0.426327	5.28e-13	7.2e-12			PMS2P1	0.422178	3.33068e-09	4.70678e-08			ASAP1	0.291665	7.32682e-09	8.72491e-08
CLPSL1	5.08071	0.00793411	1			TIPRL	0.28131	5.32e-13	7.25e-12			EDEM3	0.307124	3.36442e-09	4.75167e-08			TRIM16L	0.510392	7.45555e-09	8.87302e-08
ZNF623	-0.242988	0.00793963	0.0798248			WSB1	0.378408	5.36e-13	7.3e-12			SLC39A13	-0.34094	3.38317e-09	4.77537e-08			RTN4R	-1.13433	7.48161e-09	8.89883e-08
HSD17B11	-0.305946	0.0079594	0.0799739			SYNJ2BP	-0.45295	5.49e-13	7.47e-12			MXD4	-0.347099	3.45624e-09	4.87567e-08			FAM83G	0.390563	7.50819e-09	8.92523e-08
AP003119.2	3.95518	0.00796564	1			POLR2K	0.382086	5.51e-13	7.49e-12			NIN	-0.391432	3.48547e-09	4.91402e-08			PPFIA1	0.298636	7.68825e-09	9.13394e-08
INTS13	0.237859	0.00798552	0.0801867			TOMM70	0.300358	5.58e-13	7.58e-12			FBXO8	0.611116	3.51231e-09	4.94898e-08			GPRC5B	-0.343932	7.81961e-09	9.28459e-08
RN7SL652P	1.67534	0.00800076	1			PDE6B	-0.581341	5.76e-13	7.83e-12			MAGIX	0.739782	3.56315e-09	5.01768e-08			BCL7C	-0.515969	7.82423e-09	9.28466e-08
RPL37AP1	0.715045	0.00800355	0.0803172			RPL29	-0.304782	5.78e-13	7.85e-12			CDK8	-0.416537	3.5658e-09	5.0185e-08			WNT6	-1.55068	7.89753e-09	9.36619e-08
ZNF619	-0.945123	0.00800932	0.0803172			RSRP1	0.320252	5.86e-13	7.95e-12			AP000880.1	1.54844	3.57478e-09	5.02732e-08			SDF2	0.385581	7.91983e-09	9.38716e-08
DYRK2	0.250677	0.00801339	0.0803172			PFDN4	0.386046	5.94e-13	8.06e-12			PREX1	-0.585375	3.57623e-09	5.02732e-08			UBE2T	0.310638	8.02657e-09	9.50814e-08
CHMP3	-0.231087	0.00805004	0.0806348			ARID3B	0.477074	6.06e-13	8.22e-12			SEPHS2	0.267773	3.65929e-09	5.14109e-08			BICDL1	0.499864	8.1319e-09	9.62732e-08
SLC20A2	-0.236975	0.00807529	0.0808377			PNMA2	-0.683847	6.13e-13	8.3e-12			GLIS2	-0.460054	3.6982e-09	5.19274e-08			ZNF354A	-0.552109	8.1706e-09	9.66752e-08
RUVBL2	0.283297	0.00809543	0.0809893			RHBDD2	0.356716	6.41e-13	8.68e-12			YWHAB	0.230661	3.72553e-09	5.22808e-08			FAH	0.46105	8.23365e-09	9.73646e-08
CYSRT1	-0.981782	0.00812446	0.0812295			C8orf82	-0.329832	6.65e-13	9e-12			ARPIN	-0.785759	3.72928e-09	5.2303e-08			GLI4	-0.500394	8.53905e-09	1.00917e-07
AL691432.1	-0.412046	0.0081316	0.0812508			TIGD5	-0.510638	6.67e-13	9.02e-12			ANO8	-0.598447	3.73375e-09	5.23353e-08			HARS2	-0.340042	8.55443e-09	1.01041e-07
FRG1BP	-0.265866	0.00817906	0.0816747			SSRP1	-0.382516	6.84e-13	9.24e-12			DBP	-0.579518	3.76721e-09	5.27737e-08			PNMA2	-0.638259	8.59972e-09	1.01517e-07
SLC39A13	-0.281736	0.00818623	0.0816959			DNAJC19	-0.344525	6.88e-13	9.29e-12			DGKD	0.381101	3.78808e-09	5.30353e-08			VASN	-0.4168	8.65674e-09	1.0213e-07
SEPSECS	-0.560348	0.00822342	0.0820166			SLC25A51	0.695985	6.94e-13	9.36e-12			ZC3H7B	-0.324788	3.81236e-09	5.33443e-08			ALCAM	0.39547	8.66314e-09	1.02147e-07
RDH10	0.298327	0.00823634	0.0820667			BAIAP2	-0.350755	6.96e-13	9.4e-12			TPM1	-0.262355	3.84395e-09	5.37552e-08			RAB18	0.311652	8.67667e-09	1.02247e-07
NME2P1	1.17225	0.0082386	0.0820667			MTOR	0.282365	6.99e-13	9.42e-12			WHAMM	0.498796	3.88679e-09	5.43229e-08			ARID2	-0.368607	8.79865e-09	1.03605e-07
SEMA3A	0.275309	0.00824371	0.0820667			CEMIP2	0.587276	7.04e-13	9.49e-12			PDLIM1	-0.548482	4.02654e-09	5.62435e-08			PSMD3	-0.419774	8.80362e-09	1.03605e-07
PLAU	-0.476533	0.0082487	0.0820667			POLG	0.407716	7.13e-13	9.61e-12			MRAS	-0.62786	4.06076e-09	5.66887e-08			C11orf58	-0.374797	8.80712e-09	1.03605e-07
EXT1	-0.226789	0.00827991	0.0823266			CCDC57	-0.560078	7.35e-13	9.89e-12			SEL1L	0.319771	4.12277e-09	5.75213e-08			ADD3	-0.378812	8.94411e-09	1.05155e-07
NTS	-1.49596	0.00828894	1			DCAF15	0.308185	7.35e-13	9.89e-12			PRR36	-0.653034	4.16704e-09	5.81053e-08			VPS37D	-0.558381	8.97934e-09	1.05508e-07
AJ009632.2	4.9898	0.00830932	1			PACS1	-0.341246	7.35e-13	9.89e-12			BRF2	0.559453	4.25224e-09	5.92591e-08			BOLA3	-0.879544	8.99485e-09	1.0563e-07
ADCY5	-1.01786	0.0083179	0.0826538			G3BP1	0.275311	7.41e-13	9.96e-12			TATDN3	-0.551276	4.46319e-09	6.21631e-08			PIN1	0.292566	9.06697e-09	1.06415e-07
TMEM52	0.452457	0.00834742	0.0828477			NLRP1	1.02499	7.45e-13	1e-11			CDH16	1.11994	4.46587e-09	6.21646e-08			KLHDC10	0.285615	9.08783e-09	1.06599e-07
SLC5A6	0.265466	0.00834764	0.0828477			CYB561A3	-0.427998	7.46e-13	1e-11			TBC1D30	1.59084	4.50963e-09	6.27376e-08			CDV3	0.23078	9.09322e-09	1.06601e-07
TNFSF9	0.460226	0.00839819	0.0832445			BRD3OS	-0.572578	7.52e-13	1.01e-11			TAX1BP1	0.307465	4.52296e-09	6.28869e-08			SHISAL1	-1.25495	9.1656e-09	1.07387e-07
ZBED2	-0.601793	0.00840534	0.0832445			ZMYND11	-0.320262	7.56e-13	1.01e-11			PHC3	0.41093	4.55687e-09	6.33218e-08			ANKH	-0.336109	9.31598e-09	1.09086e-07
PRPH2	-1.16117	0.00841192	0.0832445			SLMAP	0.310397	7.63e-13	1.02e-11			LAPTM4A	0.26064	4.57076e-09	6.34784e-08			KIF2C	0.261117	9.32587e-09	1.0914e-07
LEPROT	-0.297146	0.0084154	0.0832445			S100A4	-0.268535	7.94e-13	1.06e-11			FAM84B	-0.309555	4.58086e-09	6.35822e-08			MPHOSPH9	0.437647	9.36008e-09	1.09477e-07
YPEL2	-0.250752	0.00841794	0.0832445			ARL2	-0.433921	8.13e-13	1.09e-11			AGAP3	-0.36404	4.69731e-09	6.5161e-08			SPRTN	0.432179	9.42933e-09	1.10224e-07
CHST14	-0.326065	0.00841977	0.0832445			GRAMD2A	-1.12224	8.36e-13	1.12e-11			2025-03-01	-0.573889	4.7782e-09	6.62452e-08			C5orf22	0.327152	9.43632e-09	1.10242e-07
MDH1B	-0.563383	0.00842358	0.0832445			PCNX2	-0.590977	8.68e-13	1.16e-11			B4GALT2	-0.362893	4.79147e-09	6.63909e-08			MTPN	0.276339	9.57874e-09	1.11842e-07
KRT14	-3.24585	0.00844389	1			PIR	0.544406	8.71e-13	1.16e-11			C6orf47	-0.401862	4.81084e-09	6.66057e-08			METRNL	0.360486	9.67217e-09	1.12868e-07
DNMT1	0.223255	0.00845203	0.0834748			SRRT	0.270575	8.92e-13	1.19e-11			WDR11	-0.347283	4.81248e-09	6.66057e-08			AC021242.2	2.4604	9.76759e-09	1.13916e-07
AC106872.6	5.00527	0.00846894	1			OXA1L	-0.326332	9.01e-13	1.2e-11			PPP1R12B	0.362374	4.83203e-09	6.6838e-08			NUF2	-0.46668	9.9292e-09	1.15735e-07
AP001605.1	5.00527	0.00846894	1			WNT10A	-0.827498	9.06e-13	1.21e-11			DLD	-0.259249	4.84129e-09	6.69278e-08			PCYT1A	0.266224	9.99531e-09	1.16438e-07
NAT8L	-0.275665	0.00846919	0.0835933			GEMIN5	-0.41073	9.43e-13	1.26e-11			JKAMP	0.358099	4.9391e-09	6.82409e-08			FBXW4	-0.390233	1.01667e-08	1.18367e-07
PTPRG	-0.239611	0.00847917	0.0836086			TUBB	-0.254392	9.44e-13	1.26e-11			SGPL1	0.270308	4.97056e-09	6.86363e-08			ZBTB33	-0.381102	1.02803e-08	1.19621e-07
AL035413.1	0.904467	0.00848106	0.0836086			HSD17B6	0.550621	9.51e-13	1.27e-11			DUSP3	-0.342086	5.01487e-09	6.92086e-08			PALD1	-0.389653	1.06428e-08	1.23769e-07
IFNB1	-4.99757	0.00848443	1			FLCN	0.574159	9.59e-13	1.28e-11			TMEM109	-0.34312	5.03341e-09	6.94249e-08			RBM19	0.409343	1.06976e-08	1.24335e-07
TAF9B	-0.290755	0.00849194	0.083665			MRPL9	-0.562038	9.65e-13	1.28e-11			PPP1R3D	-0.57082	5.05207e-09	6.96425e-08			ZC3H18	0.328327	1.08968e-08	1.26578e-07
ANKLE2	-0.210315	0.00852426	0.0838515			ACOX1	0.331186	9.7e-13	1.29e-11			TMBIM1	0.288286	5.07061e-09	6.98581e-08			BRF2	0.630353	1.09675e-08	1.27327e-07
ZNF181	-0.292291	0.00852599	0.0838515			GPD1L	-0.345396	9.72e-13	1.29e-11			LYAR	0.382277	5.09299e-09	7.01266e-08			RAD18	0.534202	1.12462e-08	1.30448e-07
OSER1-DT	0.312281	0.00852639	0.0838515			CTSS	0.436999	9.92e-13	1.32e-11			WDR83	0.436199	5.14889e-09	7.0818e-08			ZNF28	0.507385	1.12492e-08	1.30448e-07
LRRN2	-0.32346	0.00853636	0.0838546			ERAL1	-0.658704	1.01e-12	1.34e-11			ZMYM1	-0.588474	5.14907e-09	7.0818e-08			ASNSD1	0.316915	1.13281e-08	1.31288e-07
TMEM269	1.1164	0.00853706	0.0838546			COG2	-0.585358	1.03e-12	1.37e-11			GANAB	0.263863	5.21654e-09	7.17052e-08			NCOR2	-0.383355	1.13393e-08	1.31343e-07
THTPA	-0.418776	0.00855917	0.0839968			VDAC3	0.355577	1.04e-12	1.38e-11			BNIP2	0.363369	5.28634e-09	7.26233e-08			LIN52	0.552772	1.14044e-08	1.32023e-07
ARMH1	-1.04998	0.00856594	0.0839968			CDKN1C	0.497087	1.05e-12	1.39e-11			PALD1	-0.356757	5.29839e-09	7.27475e-08			CTPS2	-0.485448	1.14368e-08	1.32323e-07
BYSL	0.285668	0.00856708	0.0839968			LINC01936	-0.950628	1.06e-12	1.41e-11			GUCY1B1	0.68677	5.31481e-09	7.29315e-08			IMPA1	0.445781	1.14454e-08	1.32346e-07
FOLR1	-0.240293	0.00858378	0.0840779			ZBTB5	0.384863	1.1e-12	1.46e-11			SPAG5	0.320568	5.39922e-09	7.40477e-08			CHFR	0.368652	1.15129e-08	1.33052e-07
MYRF	-0.512177	0.00858573	0.0840779			H2AFJ	0.750786	1.13e-12	1.49e-11			POLR2L	-0.491343	5.45672e-09	7.47939e-08			GTF2I	-0.367973	1.15416e-08	1.33308e-07
DEGS1	-0.204	0.0086185	0.0843478			CRYZL2P	-0.745732	1.14e-12	1.51e-11			DUSP14	0.452638	5.52626e-09	7.57041e-08			UCKL1	-0.433204	1.19572e-08	1.3803e-07
PLCE1-AS2	3.90476	0.00862346	1			ZNF395	-0.521676	1.15e-12	1.51e-11			PRDM2	0.267534	5.57182e-09	7.62849e-08			TRERF1	-0.565091	1.22946e-08	1.41844e-07
SMPD5	-0.603152	0.00863779	0.0844753			DHX36	0.290054	1.15e-12	1.52e-11			ANKH	-0.301212	5.64988e-09	7.731e-08			SLC39A9	0.270253	1.23173e-08	1.42026e-07
ACVRL1	-1.05087	0.00864423	0.0844753			PPP2R1B	0.351248	1.17e-12	1.54e-11			RNF145	-0.323433	5.67449e-09	7.76028e-08			RPL35A	-0.256818	1.23511e-08	1.42335e-07
NDUFAF3	0.338483	0.00864909	0.0844753			ATL2	0.362762	1.18e-12	1.55e-11			GMNN	0.361708	5.68795e-09	7.76599e-08			GJA1	4.21651	1.23612e-08	1.4237e-07
LGMN	0.222874	0.00865237	0.0844753			PTP4A3	-0.640938	1.19e-12	1.56e-11			MVP	-0.360687	5.68821e-09	7.76599e-08			PATZ1	-0.402654	1.25794e-08	1.44801e-07
ZNF34	0.374712	0.00869283	0.0847864			MAPK8IP2	-0.77753	1.22e-12	1.6e-11			SAAL1	-0.61846	5.68831e-09	7.76599e-08			HLA-A	0.307248	1.27456e-08	1.46632e-07
NPIPB6	1.03064	0.0086947	0.0847864			IRGQ	0.41726	1.23e-12	1.61e-11			AC010422.8	0.57701	5.75372e-09	7.85085e-08			CFL2	-0.393079	1.29316e-08	1.48688e-07
STMND1	4.95866	0.00870182	1			GLCCI1	0.433226	1.23e-12	1.62e-11			AHDC1	-0.295669	5.76892e-09	7.86716e-08			B2M	0.248707	1.30943e-08	1.50473e-07
THBS4	0.565474	0.00871415	0.0849249			FAM126B	0.619037	1.24e-12	1.63e-11			AC005261.3	1.41235	5.8243e-09	7.93819e-08			DIRAS2	2.37793	1.31343e-08	1.50825e-07
ALCAM	0.267086	0.0087284	0.0850127			FOXRED2	-0.430027	1.25e-12	1.64e-11			LIN52	0.499497	5.86064e-09	7.98322e-08			ACSF3	-0.850784	1.31397e-08	1.50825e-07
JMJD4	-0.359935	0.00874016	0.0850761			TRERF1	-0.612673	1.25e-12	1.65e-11			CAB39L	0.586724	5.9479e-09	8.09752e-08			STRADB	-0.558373	1.325e-08	1.52005e-07
LINC01139	0.416353	0.00878608	0.085456			COL5A1	-0.794606	1.26e-12	1.65e-11			WDR54	-0.454224	5.97756e-09	8.13332e-08			NRBP2	-0.295667	1.32792e-08	1.52255e-07
PTEN	-0.259349	0.00878973	0.085456			MDFIC	-0.444661	1.27e-12	1.67e-11			RHBDD2	0.336227	6.00436e-09	8.1627e-08			CASTOR3	-0.443893	1.34804e-08	1.54474e-07
NPLOC4	0.208258	0.00880739	0.0855764			SSH3	-0.519078	1.29e-12	1.69e-11			BUD31	0.327031	6.00591e-09	8.1627e-08			MIIP	0.376251	1.37073e-08	1.56932e-07
MRGBP	0.237774	0.00883133	0.0857166			IDH3B	0.29053	1.35e-12	1.77e-11			CANX	0.249311	6.05594e-09	8.22607e-08			ALKBH2	0.32965	1.37158e-08	1.56932e-07
TSPAN9	-0.263546	0.0088324	0.0857166			AGPAT3	-0.356228	1.36e-12	1.78e-11			AC005261.5	1.85757	6.08028e-09	8.25449e-08			INHBE	0.893305	1.3718e-08	1.56932e-07
AL445524.1	0.29023	0.00890967	0.0864148			SLC25A44	0.326774	1.36e-12	1.79e-11			ZBTB3	0.637893	6.09821e-09	8.27418e-08			ELOB	-0.362695	1.38023e-08	1.57809e-07
PLEKHH3	0.327518	0.00892365	0.0864985			TGOLN2	0.257732	1.37e-12	1.79e-11			APH1A	-0.284467	6.15097e-09	8.34109e-08			NFKBIZ	0.645258	1.38904e-08	1.58727e-07
DISP2	0.445692	0.0089316	0.0865238			RAVER2	-0.380505	1.38e-12	1.81e-11			SPARC	-0.687665	6.15917e-09	8.34752e-08			PRIM2	0.440103	1.39998e-08	1.59887e-07
AC093627.1	-4.4316	0.00894563	1			DNAJC8	0.357637	1.4e-12	1.83e-11			CUEDC2	-0.404906	6.21804e-09	8.42258e-08			PODXL	-0.239254	1.40142e-08	1.59962e-07
C14orf132	0.601414	0.00895599	0.0866481			GLUD1	0.238283	1.43e-12	1.86e-11			GPR27	-1.18582	6.25337e-09	8.46569e-08			GPRASP2	-0.883624	1.40284e-08	1.60034e-07
OPN3	0.389651	0.00896214	0.0866481			PIK3C2B	-0.473199	1.43e-12	1.87e-11			AGTRAP	0.365825	6.28103e-09	8.49838e-08			RAB3GAP1	-0.355421	1.41213e-08	1.61004e-07
2025-03-08	-0.230498	0.00896478	0.0866481			DNAJB4	0.491916	1.45e-12	1.89e-11			IL1RAP	0.579651	6.46291e-09	8.73958e-08			NECTIN2	0.347695	1.41684e-08	1.61398e-07
MT-ND4L	0.219227	0.00896581	0.0866481			ASAH1	0.345892	1.46e-12	1.91e-11			THOP1	-0.387114	6.49409e-09	8.77683e-08			LONRF2	-0.350748	1.41718e-08	1.61398e-07
AC010336.5	-3.13121	0.00899133	1			KAT7	0.40806	1.47e-12	1.91e-11			CACNA2D2	0.570174	6.49889e-09	8.77841e-08			ABCD1	0.368828	1.42416e-08	1.62102e-07
SEMA4B	-0.289365	0.00904488	0.0873601			KLHL29	-0.410834	1.49e-12	1.94e-11			RTN3	0.262005	6.61404e-09	8.92895e-08			ACOX1	0.292831	1.43077e-08	1.62764e-07
DNAJA4	0.750648	0.0090515	0.087372			SAR1A	0.270799	1.49e-12	1.94e-11			OAF	-0.52142	6.63324e-09	8.94718e-08			ANKS6	-0.397312	1.4389e-08	1.63598e-07
SPEG	-0.565731	0.00905903	0.0873927			FBXO33	0.405878	1.49e-12	1.94e-11			CLSPN	0.358327	6.63495e-09	8.94718e-08			EPS8L1	-0.437115	1.44242e-08	1.63906e-07
IFNGR1	-0.23807	0.00908721	0.0875639			AP000648.3	0.54005	1.49e-12	1.94e-11			SCARF2	-0.811626	6.6642e-09	8.98162e-08			MEF2D	0.327206	1.44492e-08	1.64098e-07
WDR3	0.19338	0.00908759	0.0875639			SLCO4A1	0.386275	1.5e-12	1.95e-11			PTPN13	-0.551435	6.72566e-09	9.05939e-08			ISM2	-1.60346	1.4878e-08	1.68874e-07
CD209	4.93496	0.00910047	1			EPHB4	-0.310884	1.51e-12	1.96e-11			FAM214B	0.482792	6.78029e-09	9.12789e-08			METTL24	-0.958462	1.49064e-08	1.69103e-07
FAN1	-0.421774	0.00910214	0.087652			WHAMM	0.636606	1.52e-12	1.97e-11			BAHD1	0.348997	6.82366e-09	9.18117e-08			RPS6KC1	0.344396	1.4926e-08	1.69231e-07
CACNG4	-1.10163	0.0091396	0.0879605			PLOD1	-0.268784	1.55e-12	2.02e-11			SEC16A	0.267834	6.88608e-09	9.25999e-08			GSK3A	-0.351084	1.50721e-08	1.70792e-07
POLR2G	0.217643	0.00916812	0.0881826			PRDM2	0.311992	1.56e-12	2.03e-11			CEBPB	0.413993	7.03403e-09	9.45369e-08			WDR11	-0.409901	1.51536e-08	1.7162e-07
LINC01833	-1.16364	0.00918803	0.0883217			MICAL3	-0.542858	1.57e-12	2.03e-11			DNHD1	0.340717	7.05012e-09	9.47005e-08			TAF7	0.272557	1.53013e-08	1.73197e-07
BCL11A	5.22412	0.00919104	1			ATP6AP2	0.28827	1.64e-12	2.12e-11			LINC00894	0.594693	7.21677e-09	9.68852e-08			RAB35	0.316977	1.53466e-08	1.73613e-07
PSMC4	0.227243	0.00919493	0.0883356			TPST1	0.4817	1.66e-12	2.15e-11			ZDHHC8	-0.552661	7.23666e-09	9.70982e-08			H2AFY2	-0.450562	1.54931e-08	1.75172e-07
STAT5B	0.238904	0.00920265	0.0883574			PPIL4	0.469336	1.67e-12	2.15e-11			RTF2	0.255955	7.24227e-09	9.71196e-08			ABHD14B	-0.399688	1.5618e-08	1.76486e-07
MRPL15	-0.221202	0.00922628	0.0885318			RPN2	0.2456	1.67e-12	2.16e-11			SLAIN1	-0.402792	7.29926e-09	9.78295e-08			GRAMD2A	-0.975723	1.56623e-08	1.76889e-07
ABCC3	-0.546552	0.00923996	0.088585			TNFRSF10B	0.315822	1.67e-12	2.16e-11			GSK3A	-0.321307	7.55511e-09	1.01202e-07			ZNF112	-1.01431	1.57296e-08	1.77551e-07
GAS2L1	-0.316735	0.00924275	0.088585			CRELD2	0.389373	1.69e-12	2.18e-11			DOHH	0.497432	7.63729e-09	1.02247e-07			KIAA1211L	-0.594455	1.58803e-08	1.79152e-07
RPL23AP95	-3.13954	0.00925976	1			NOP53	-0.265541	1.7e-12	2.2e-11			AC012435.1	1.58686	7.8133e-09	1.04545e-07			PADI2	-0.857249	1.62259e-08	1.8295e-07
ACOT13	0.28346	0.00927407	0.0888326			SNIP1	0.402813	1.71e-12	2.21e-11			TCEANC2	-0.35742	7.84521e-09	1.04914e-07			COQ7	0.408803	1.67119e-08	1.88326e-07
AL031710.1	-0.53047	0.00929333	0.0889645			SCGB1D2	1.55932	1.72e-12	2.21e-11			CHCHD10	-0.450406	7.90247e-09	1.05621e-07			PSRC1	-0.411233	1.6772e-08	1.88798e-07
FBXO4	-0.435652	0.00932085	0.089132			MT1F	-1.12507	1.72e-12	2.21e-11			SLIT3	-0.482097	7.95929e-09	1.06322e-07			ISG15	0.534613	1.67724e-08	1.88798e-07
FAM229B	-0.591209	0.00932247	0.089132			SLC25A12	-0.474743	1.8e-12	2.31e-11			COASY	0.358885	8.00542e-09	1.06864e-07			RAB22A	0.313962	1.70924e-08	1.92294e-07
HOXB3	-0.281921	0.00932962	0.089132			VAMP1	0.533652	1.8e-12	2.31e-11			USF1	0.307683	8.00871e-09	1.06864e-07			HBEGF	0.437871	1.71342e-08	1.92658e-07
CIB2	-0.431707	0.00933282	0.089132			KDM1B	0.41748	1.88e-12	2.42e-11			WNK3	0.502083	8.1282e-09	1.08398e-07			CPE	-0.377319	1.71553e-08	1.92789e-07
SNAPC5	0.264523	0.00934246	0.0891715			TPM2	-0.308871	1.89e-12	2.43e-11			KCMF1	0.284142	8.17175e-09	1.08919e-07			COG2	-0.662918	1.74501e-08	1.95994e-07
FZD8	1.11351	0.00935561	0.0892444			MME	-0.505357	1.9e-12	2.45e-11			CRYZL2P	-0.542852	8.29302e-09	1.10475e-07			NRIP3	1.00523	1.7542e-08	1.96917e-07
KIAA1328	-0.368669	0.00937624	0.0893886			CARHSP1	-0.407546	1.96e-12	2.51e-11			PYGB	-0.269358	8.35326e-09	1.11216e-07			EML1	-0.877591	1.78924e-08	2.0074e-07
WRAP73	0.263291	0.00938763	0.0894446			MAP7D1	0.296171	1.96e-12	2.52e-11			LINC01127	-0.374518	8.37328e-09	1.11421e-07			CCDC24	-0.485498	1.8159e-08	2.03619e-07
FUBP3	0.20223	0.00939447	0.0894572			AGRN	-0.346122	1.97e-12	2.53e-11			CCNB3	1.24067	8.41224e-09	1.11878e-07			TMX3	0.434454	1.82961e-08	2.05043e-07
ZNF776	-0.387495	0.00942445	0.0895992			LLGL1	-0.530632	1.97e-12	2.53e-11			MED16	-0.430287	8.4302e-09	1.11998e-07			FH	-0.255508	1.83123e-08	2.05112e-07
TNC	0.225429	0.00942506	0.0895992			COX4I1	-0.288156	2e-12	2.57e-11			ARNTL2	-0.549975	8.43055e-09	1.11998e-07			MGAT1	0.261826	1.83595e-08	2.05527e-07
AC114490.3	-0.773117	0.00942686	0.0895992			TRIM29	-0.506466	2.03e-12	2.61e-11			SLC12A2	0.343923	8.55823e-09	1.13632e-07			SKIV2L	0.326261	1.84733e-08	2.06688e-07
OGDHL	-0.256385	0.0094315	0.0895992			TXLNA	0.247823	2.04e-12	2.62e-11			ZBTB20	1.09081	8.5649e-09	1.13658e-07			AASDHPPT	-0.480886	1.85381e-08	2.07298e-07
CLCNKA	-0.785067	0.00943837	0.089612			JAGN1	-0.468113	2.05e-12	2.62e-11			AC021242.2	2.28427	8.60371e-09	1.1411e-07			SYDE1	-0.293308	1.8595e-08	2.07821e-07
APOL2	0.236523	0.00946477	0.0898101			PNMA3	-0.734294	2.05e-12	2.62e-11			EVA1A	-0.520536	8.70751e-09	1.15424e-07			ALDH1B1	-0.31773	1.86579e-08	2.0841e-07
OR7E128P	-1.52727	0.00946801	1			VASP	-0.450226	2.1e-12	2.68e-11			AFF1	0.29815	8.77416e-09	1.16243e-07			PLEKHG4	-0.60755	1.87615e-08	2.09452e-07
PPP1R15A	0.256749	0.00950723	0.0901602			KIF1BP	-0.512362	2.12e-12	2.71e-11			HMBOX1	0.52004	8.88409e-09	1.17635e-07			ARL4D	0.487602	1.88268e-08	2.10066e-07
MALSU1	0.267353	0.0095157	0.0901877			CUL7	-0.373873	2.13e-12	2.72e-11			NR2F2	-0.468939	8.89766e-09	1.1775e-07			PDE4D	0.649658	1.88976e-08	2.10741e-07
AC211476.2	-1.3056	0.00954016	1			ZFP64	-0.423041	2.14e-12	2.73e-11			PLCXD2	1.09904	9.16134e-09	1.21173e-07			AMOT	-0.382223	1.89294e-08	2.1098e-07
AC017074.1	-1.00989	0.00955935	0.0905485			PLPP5	0.445583	2.2e-12	2.81e-11			FOXO4	-0.424984	9.21884e-09	1.21867e-07			FBXO41	-0.39905	1.93791e-08	2.15874e-07
ADIRF-AS1	-0.312321	0.00957652	0.0906581			QRICH2	-0.945408	2.23e-12	2.84e-11			UBR5	0.282283	9.22636e-09	1.219e-07			CISD3	-0.47496	1.95667e-08	2.17844e-07
NGDN	0.226224	0.00958685	0.0907029			PTPRF	-0.280571	2.25e-12	2.86e-11			ASXL2	0.302172	9.3987e-09	1.24109e-07			TM7SF2	-0.352019	1.96145e-08	2.18257e-07
PIP4P1	0.266136	0.00959271	0.0907054			RAPGEF1	-0.363774	2.33e-12	2.97e-11			EEF1A2	-0.662482	9.42794e-09	1.24405e-07			ZNF32	-0.634334	1.97867e-08	2.20053e-07
CBX1	-0.236578	0.00962448	0.090918			ELAC2	0.329949	2.34e-12	2.98e-11			TMEM214	-0.365396	9.43137e-09	1.24405e-07			STEAP3	-1.05951	1.99455e-08	2.21697e-07
NKRF	0.228977	0.00962641	0.090918			TBL1XR1	0.313661	2.34e-12	2.98e-11			ESR1	0.350132	9.52956e-09	1.25631e-07			ARF4	0.222679	2.01489e-08	2.23836e-07
TTF2	0.202119	0.00964083	0.0910012			DCUN1D5	0.304428	2.35e-12	2.98e-11			AL137793.1	2.9153	9.53939e-09	1.25692e-07			DDX17	-0.230065	2.03986e-08	2.26487e-07
DDB1	0.204428	0.00966277	0.0911551			ASB9	-0.793837	2.35e-12	2.99e-11			MSRB1	0.396506	9.5769e-09	1.26118e-07			RAPGEF1	-0.362688	2.05096e-08	2.27595e-07
HMGCS2	-2.5275	0.00966471	1			CYC1	-0.260245	2.38e-12	3.02e-11			MYO1C	-0.281979	9.647e-09	1.26972e-07			BEX3	-0.258499	2.05687e-08	2.28126e-07
SH3BGRL	-0.261581	0.00967108	0.0911805			SYT11	0.228828	2.44e-12	3.1e-11			PYROXD2	-0.435009	9.782e-09	1.28678e-07			C18orf25	0.369474	2.12566e-08	2.35628e-07
PITPNC1	0.44798	0.00969277	0.0913318			SIKE1	0.283136	2.45e-12	3.1e-11			MTHFD2	0.254986	9.87163e-09	1.29722e-07			LINC01936	-0.847171	2.13248e-08	2.36255e-07
PACS1	-0.239484	0.00973445	0.0916183			DAGLA	-0.603289	2.47e-12	3.13e-11			NT5DC3	0.606883	9.87211e-09	1.29722e-07			XPO5	0.272478	2.17259e-08	2.40568e-07
FOXP2	0.56559	0.00973448	0.0916183			NEURL1	-0.477403	2.5e-12	3.17e-11			HTRA1	-0.711255	9.88125e-09	1.29772e-07			KCTD15	-0.427229	2.17524e-08	2.40731e-07
TAMM41	-0.473966	0.00978535	0.092035			CACNA2D2	0.7253	2.57e-12	3.25e-11			AC087741.1	-0.508077	9.91444e-09	1.30137e-07			ZMYND11	-0.311033	2.21448e-08	2.44941e-07
TFCP2	0.295227	0.00979011	0.092035			HNRNPAB	0.374581	2.61e-12	3.31e-11			PRRG2	0.524678	9.9336e-09	1.30318e-07			ARHGAP25	1.62251	2.2461e-08	2.48303e-07
ZNRF1	-0.277054	0.00980359	0.0920836			CSNK2A2	-0.360434	2.61e-12	3.31e-11			AVPI1	0.372613	9.9875e-09	1.30942e-07			NANOS1	-1.13793	2.26218e-08	2.49945e-07
NOC2L	0.246762	0.00980664	0.0920836			PPP1R26-AS1	-0.965813	2.71e-12	3.42e-11			FH	-0.265697	9.99201e-09	1.30942e-07			CRBN	-0.476754	2.26499e-08	2.50119e-07
ZNF610	-1.03032	0.00981906	0.0921468			SNAPC1	0.626289	2.72e-12	3.43e-11			TTC30B	-0.552942	1.00539e-08	1.31681e-07			HRG	2.55849	2.27882e-08	2.51511e-07
CRLS1	-0.267528	0.00986533	0.0924859			WASHC2A	0.286085	2.93e-12	3.69e-11			CHFR	0.335047	1.03215e-08	1.35114e-07			SUPT5H	0.266059	2.28494e-08	2.52049e-07
TP53INP2	-0.219622	0.0098666	0.0924859			CEP89	0.324525	2.96e-12	3.74e-11			WNK1	0.281288	1.04023e-08	1.36098e-07			ZSWIM8	0.319403	2.2957e-08	2.53098e-07
MIR210HG	0.322406	0.00988732	0.0926265			ZNF724	0.710641	2.97e-12	3.74e-11			ITPKC	0.37072	1.04636e-08	1.36826e-07			TSPAN14	0.24561	2.35276e-08	2.5925e-07
AC010536.2	4.95083	0.00990075	1			RPF1	0.348711	2.97e-12	3.75e-11			POLR3D	0.273304	1.05275e-08	1.37587e-07			FOXO4	-0.439157	2.37571e-08	2.61636e-07
TMEM125	-0.358102	0.00990953	0.092769			EIF2AK1	0.246878	3e-12	3.78e-11			STRAP	0.234117	1.05671e-08	1.3803e-07			PARP10	-0.313463	2.38005e-08	2.61973e-07
SRM	0.29628	0.00991398	0.092769			ANKRD13C	0.393774	3.13e-12	3.95e-11			CFLAR	0.415512	1.07196e-08	1.39946e-07			TXNL1	0.276865	2.38178e-08	2.62022e-07
AC069257.1	2.01374	0.0099155	1			GPT2	-0.293296	3.15e-12	3.96e-11			TMEM98	-0.964133	1.07669e-08	1.40487e-07			DNAJB12	0.293806	2.38891e-08	2.62664e-07
DNM3OS	2.33876	0.00992272	1			IRF2BP1	-0.363171	3.23e-12	4.07e-11			PIM3	0.410963	1.07814e-08	1.406e-07			CCDC134	0.709421	2.39486e-08	2.63176e-07
RUVBL1	0.218987	0.00997718	0.0933065			ZNF468	0.552299	3.27e-12	4.11e-11			FOXO3	-0.340748	1.07952e-08	1.40705e-07			CNPY3	0.30502	2.41441e-08	2.65181e-07
PLEKHG4B	-0.257075	0.0100005	0.0934705			KCTD15	-0.491071	3.29e-12	4.14e-11			WDR34	-0.372962	1.08749e-08	1.41667e-07			EFNB3	-1.18413	2.4239e-08	2.6608e-07
EPB41L3	-0.889504	0.0100186	0.0935423			TMEM189	0.333261	3.3e-12	4.15e-11			ZNF770	0.325562	1.09044e-08	1.41975e-07			TRIP10	0.27836	2.42751e-08	2.66333e-07
OSGIN1	0.367035	0.0100197	0.0935423			IKBKE	-0.673581	3.68e-12	4.62e-11			EPCAM	0.263493	1.1109e-08	1.44561e-07			COA3	-0.620668	2.44147e-08	2.6772e-07
PTGES3P1	0.383	0.010037	0.0935646			STK17A	0.387026	3.69e-12	4.63e-11			ARHGAP25	1.48936	1.144e-08	1.48788e-07			TUBG1	0.379006	2.46646e-08	2.70315e-07
PSMA6P1	0.722048	0.0100376	0.0935646			ALCAM	0.332748	3.73e-12	4.67e-11			TMEM132A	-0.384744	1.1688e-08	1.51931e-07			EIF2S2	0.252437	2.48765e-08	2.72451e-07
CAPN5	-0.334025	0.0100394	0.0935646			CHTOP	0.290841	3.73e-12	4.67e-11			RPL29	-0.237053	1.17052e-08	1.52073e-07			DENND1A	-0.474005	2.48862e-08	2.72451e-07
ASS1	-0.233718	0.0100719	0.0938129			MRPL16	-0.367996	3.74e-12	4.69e-11			BICDL1	0.468175	1.18813e-08	1.54278e-07			GMNN	0.410077	2.52809e-08	2.76511e-07
MAGIX	0.392839	0.0100893	0.0939211			ZNF252P	-0.507767	3.81e-12	4.77e-11			ZNF181	-0.390423	1.21335e-08	1.57469e-07			ATP9A	-0.295876	2.52843e-08	2.76511e-07
FHOD1	0.295687	0.0101038	0.093983			ADCY6	-0.306053	3.91e-12	4.89e-11			IVD	-0.363459	1.2226e-08	1.58584e-07			DOK5	-0.637366	2.54785e-08	2.78485e-07
IL15	-0.370177	0.0101075	0.093983			CCDC151	-0.745985	3.95e-12	4.94e-11			CCND1	-0.467274	1.22659e-08	1.59015e-07			DCLRE1A	0.457958	2.57549e-08	2.81356e-07
ZBED3-AS1	0.555269	0.0101144	0.0939929			DNAJC21	0.343241	4.01e-12	5.01e-11			LINC01128	0.427669	1.22789e-08	1.59023e-07			SETX	0.288659	2.59948e-08	2.83824e-07
TSPAN5	-0.477757	0.0101278	0.0940175			SBDSP1	0.551487	4.04e-12	5.05e-11			TMED3	0.302306	1.22796e-08	1.59023e-07			R3HCC1	-0.752196	2.70056e-08	2.94703e-07
COQ10A	-0.306313	0.0101286	0.0940175			NAPG	0.47612	4.05e-12	5.06e-11			NDUFS5	-0.297084	1.23121e-08	1.59359e-07			PERP	-0.302592	2.70964e-08	2.95535e-07
DHRS7	-0.506869	0.0101577	0.0942049			UBA2	0.256571	4.07e-12	5.07e-11			PHF21A	-0.31523	1.25057e-08	1.61777e-07			MRPL9	-0.485627	2.72759e-08	2.97334e-07
AC007182.2	0.484635	0.0101608	0.0942049			FAM160B2	-0.494247	4.07e-12	5.07e-11			PLXND1	-0.782741	1.2545e-08	1.62199e-07			OPN1SW	0.640485	2.82521e-08	3.0781e-07
AC022150.4	0.398724	0.0101704	0.0942049			DNAJC11	-0.404696	4.19e-12	5.22e-11			CPEB3	0.579224	1.26361e-08	1.63289e-07			COL27A1	-0.311299	2.85196e-08	3.10559e-07
AC073111.1	1.01268	0.0101721	0.0942049			BET1	0.335003	4.39e-12	5.47e-11			ENPP3	4.89291	1.27325e-08	1.64448e-07			HBS1L	0.30779	2.85874e-08	3.1113e-07
TRIM66	-0.27451	0.0101897	0.0943146			ZYX	-0.311559	4.41e-12	5.49e-11			ASH1L	0.280444	1.27459e-08	1.64532e-07			BCAM	-0.298759	2.8816e-08	3.13451e-07
FDPS	0.257022	0.0101975	0.0943324			PLIN3	0.368029	4.56e-12	5.67e-11			SPRY1	-0.53508	1.28593e-08	1.65908e-07			RGS9	-0.68568	2.8937e-08	3.14599e-07
HMGA1	0.256884	0.0102228	0.0945124			ARHGEF25	-0.477739	4.57e-12	5.68e-11			GPR173	-0.503377	1.28756e-08	1.66029e-07			KIF5A	-0.39506	2.91146e-08	3.16361e-07
RPL31P61	-2.67628	0.0102246	1			SAPCD2	-0.630884	4.57e-12	5.68e-11			CLDN9	-0.944864	1.29628e-08	1.67064e-07			ZDHHC16	-0.332912	2.94146e-08	3.1945e-07
DZANK1	-0.572855	0.0102426	0.0946419			SNRPA1	0.378091	4.77e-12	5.93e-11			PCYT1A	0.26096	1.30779e-08	1.68458e-07			AC073611.1	1.28516	2.94678e-08	3.19858e-07
BTG1	-0.24366	0.0102521	0.094676			ZC3H7B	-0.346632	4.83e-12	5.99e-11			ATG5	0.305302	1.31014e-08	1.6867e-07			BHLHE40	0.422869	2.95346e-08	3.20351e-07
RPSAP15	0.447232	0.0102696	0.0947836			GNPDA1	0.28134	4.83e-12	6e-11			PI4KB	-0.296345	1.32122e-08	1.70007e-07			TOP2B	-0.327939	2.95447e-08	3.20351e-07
AC002558.1	3.34774	0.010297	1			ZNF664	-0.335999	4.87e-12	6.04e-11			MC4R	2.43916	1.32218e-08	1.7004e-07			OPA1	0.294137	2.95883e-08	3.20652e-07
COG5	0.231858	0.0103157	0.0951545			CEP164	-0.367921	4.89e-12	6.06e-11			TMED10	0.275169	1.32691e-08	1.70557e-07			RNF168	0.390743	2.9679e-08	3.21465e-07
OPRK1	1.19356	0.0103297	0.0952211			PLXNA1	-0.322962	4.92e-12	6.09e-11			ATXN2L	0.282239	1.33094e-08	1.70984e-07			NAA35	0.361544	3.02599e-08	3.27582e-07
ROM1	0.361984	0.0103389	0.0952211			KIAA1522	-0.227748	5.14e-12	6.37e-11			NKAP	-0.555725	1.38046e-08	1.77252e-07			C1orf43	0.22447	3.05198e-08	3.3022e-07
HUS1	0.244199	0.0103405	0.0952211			NDN	-0.573877	5.16e-12	6.39e-11			TNS1	-0.363183	1.38542e-08	1.77741e-07			TTF1	0.380434	3.05979e-08	3.3089e-07
GPATCH2L	0.224126	0.0103491	0.0952455			HLA-E	0.25918	5.23e-12	6.47e-11			VEGFC	-0.619169	1.38574e-08	1.77741e-07			TM9SF2	0.269447	3.08747e-08	3.33706e-07
ADAM15	0.248832	0.0103602	0.0952943			TIMM22	-0.836858	5.26e-12	6.51e-11			MTX3	0.383524	1.39047e-08	1.78253e-07			FRZB	-0.232965	3.11546e-08	3.36552e-07
IGSF9	-0.535377	0.0103784	0.0954073			GPNMB	1.20936	5.27e-12	6.51e-11			ATP6V1H	0.322939	1.39829e-08	1.79161e-07			HSPA1B	0.241781	3.12568e-08	3.37478e-07
ZNF248	0.274747	0.0104082	0.0956269			FTL	0.578666	5.27e-12	6.51e-11			ACOX1	0.30059	1.42128e-08	1.8201e-07			OGFOD3	-0.439859	3.15082e-08	3.40011e-07
MRPS26	-0.308481	0.010426	0.0957358			MAP4K2	-0.498994	5.27e-12	6.51e-11			PIK3C2B	-0.3841	1.42483e-08	1.82368e-07			MYO1C	-0.294676	3.17675e-08	3.42628e-07
TRIM8	-0.242181	0.0104756	0.0961373			HSPE1	0.280394	5.32e-12	6.57e-11			TSC22D1	0.299137	1.42808e-08	1.82687e-07			ZNF853	-0.492297	3.21103e-08	3.46142e-07
RNF181	0.265831	0.0104817	0.096139			FAM171A2	-0.888629	5.37e-12	6.62e-11			CLSTN2	-0.515474	1.43213e-08	1.83108e-07			ERAP2	0.306053	3.21384e-08	3.46261e-07
ANKRD29	-0.383862	0.0105451	0.0966273			ADAM15	0.269554	5.42e-12	6.69e-11			ADRM1	0.391652	1.47113e-08	1.87995e-07			TXNRD2	-0.579753	3.21586e-08	3.46296e-07
SDC4	-0.185633	0.0105469	0.0966273			PDCL3	0.353624	5.44e-12	6.71e-11			PLOD3	0.305147	1.49986e-08	1.91565e-07			LINC01224	-0.52338	3.24067e-08	3.48783e-07
ADGRB1	-1.50727	0.0105639	1			CD81	-0.23138	5.48e-12	6.75e-11			KRCC1	-0.568745	1.5067e-08	1.92259e-07			SHKBP1	0.343729	3.24332e-08	3.48884e-07
C16orf58	-0.286617	0.010583	0.096903			LINC00857	-0.64509	5.5e-12	6.77e-11			NDRG3	0.231866	1.50688e-08	1.92259e-07			CEP89	0.306672	3.27161e-08	3.51639e-07
VGLL4	-0.222235	0.0105945	0.0969266			PRDX4	0.302977	5.7e-12	7.02e-11			SCAPER	0.456817	1.52778e-08	1.94822e-07			PDLIM1	-0.589878	3.27238e-08	3.51639e-07
PTPN21	-0.339848	0.0105975	0.0969266			ZNF580	-0.660298	5.73e-12	7.05e-11			ZFP69B	0.467671	1.55417e-08	1.98083e-07			ACTR10	-0.467237	3.30965e-08	3.55456e-07
HOMER3	-0.298824	0.0106265	0.0971369			UBA6	0.298767	5.85e-12	7.19e-11			ACADVL	-0.326656	1.57219e-08	2.00274e-07			KLHL29	-0.374774	3.38964e-08	3.63825e-07
CCNE1	0.209834	0.0106627	0.0974125			ENPP4	0.343146	5.98e-12	7.34e-11			RCOR2	-1.16663	1.57621e-08	2.0068e-07			NEURL1	-0.509305	3.39115e-08	3.63825e-07
CYP2U1	-0.342356	0.0106852	0.0975632			CENPN	0.416069	6.06e-12	7.44e-11			RND1	0.756071	1.58816e-08	2.02095e-07			RBBP9	-0.447804	3.4125e-08	3.65923e-07
FBXO6	-0.641372	0.0106972	0.0976071			STAMBP	0.334424	6.15e-12	7.55e-11			EMX2OS	-0.224261	1.59532e-08	2.029e-07			RB1CC1	0.326195	3.45725e-08	3.70527e-07
RHBDF1	-0.331404	0.010702	0.0976071			FAM69B	-0.703979	6.16e-12	7.56e-11			SMKR1	-0.594205	1.62084e-08	2.06037e-07			ZBTB42	-0.704949	3.46097e-08	3.7073e-07
CCDC86	0.25559	0.010719	0.097707			CD320	0.32068	6.19e-12	7.58e-11			TMED9	0.297538	1.62793e-08	2.06829e-07			ADPGK	0.365016	3.4814e-08	3.72589e-07
AL358334.2	-1.09975	0.0107442	0.0977784			DNAJC27	0.790202	6.23e-12	7.64e-11			CTBP2	-0.254146	1.63162e-08	2.0719e-07			PLEKHA1	-0.378369	3.48199e-08	3.72589e-07
SLC25A25	0.275623	0.0107447	0.0977784			PAFAH2	-0.494045	6.62e-12	8.11e-11			ITSN1	0.29986	1.64471e-08	2.08741e-07			PPFIA3	0.643169	3.51624e-08	3.76057e-07
YARS	0.208628	0.0107449	0.0977784			OAZ1	0.362175	6.64e-12	8.13e-11			TBC1D8B	-0.710424	1.65322e-08	2.09711e-07			RAB6A	0.343757	3.54979e-08	3.79445e-07
TRPM8	1.12827	0.0107762	0.0979622			C19orf70	-0.495484	6.7e-12	8.19e-11			FBXW8	-0.517664	1.65683e-08	2.10012e-07			NUDT5	0.272828	3.601e-08	3.84717e-07
IMP3	0.298628	0.0107772	0.0979622			SAMD5	-1.11864	6.77e-12	8.28e-11			PDE6B	-0.461509	1.65733e-08	2.10012e-07			UTP14A	-0.261258	3.62608e-08	3.87194e-07
DDHD1	0.232032	0.0107857	0.0979845			MAN2B1	0.28627	6.81e-12	8.32e-11			RPS24	-0.241222	1.69063e-08	2.1412e-07			GLS	0.346137	3.63085e-08	3.875e-07
CXCL2	1.08499	0.0107945	0.0980096			DUSP3	-0.363134	7.05e-12	8.61e-11			NAPEPLD	-0.428641	1.70354e-08	2.15641e-07			BCAR3	0.424526	3.67202e-08	3.91689e-07
NSMCE1	0.235614	0.0108251	0.0982323			KIF1C	-0.264337	7.26e-12	8.86e-11			ANAPC16	-0.254707	1.71501e-08	2.1698e-07			ASXL2	0.310397	3.70979e-08	3.9551e-07
RPARP-AS1	-0.257271	0.0108384	0.0982973			HIST2H2BF	1.4215	7.34e-12	8.95e-11			METTL24	-0.800838	1.73586e-08	2.19503e-07			TMEM214	-0.340189	3.73935e-08	3.98453e-07
CRIP2	-0.320171	0.0108456	0.0983076			FZD4	-0.536063	7.55e-12	9.2e-11			HDAC6	0.33229	1.73831e-08	2.19698e-07			SUGP2	0.222281	3.744e-08	3.98739e-07
SERTAD2	0.252654	0.0108752	0.098521			PRPF19	-0.281393	7.55e-12	9.2e-11			PRIM2	0.384667	1.75817e-08	2.22092e-07			PIANP	-0.638178	3.7781e-08	4.02162e-07
CFAP46	-1.76144	0.0109284	1			GLI4	-0.580792	7.78e-12	9.47e-11			TRIM69	-0.370946	1.76669e-08	2.22982e-07			LINC00857	-0.578762	3.82869e-08	4.07333e-07
LAMA5	-0.286431	0.0109434	0.0990839			FH	-0.286649	7.78e-12	9.47e-11			PDE11A	-0.904119	1.76706e-08	2.22982e-07			PLPP5	0.394959	3.84687e-08	4.09054e-07
TOB1	0.242392	0.0109922	0.0994702			FUNDC1	0.458675	8.02e-12	9.76e-11			MAGEH1	0.312028	1.77483e-08	2.23845e-07			CXorf38	0.375017	3.85139e-08	4.09321e-07
LINC02204	-3.06965	0.0110046	1			ICE1	-0.295103	8.19e-12	9.96e-11			GRB2	0.23171	1.77975e-08	2.24349e-07			DGKZ	-0.367509	3.87117e-08	4.11208e-07
CTDSPL	-0.226119	0.0110111	0.0995851			NDRG2	-0.863058	8.23e-12	1e-10			HGFAC	-1.02489	1.78256e-08	2.24586e-07			CRYZL2P	-0.605913	3.92229e-08	4.16343e-07
IL11RA	-0.320656	0.0110242	0.0996321			BEX2	0.30997	8.26e-12	1e-10			MON1B	0.277196	1.79163e-08	2.25611e-07			GATA2	0.39249	3.9236e-08	4.16343e-07
FECH	-0.253851	0.0110286	0.0996321			MYL12B	0.260286	8.31e-12	1.01e-10			NUFIP2	0.302349	1.82821e-08	2.30097e-07			ZNF599	-0.538069	3.93447e-08	4.17225e-07
C9orf78	0.208502	0.0110811	0.100051			STK11IP	0.360844	8.48e-12	1.03e-10			LSM5	-0.326014	1.86613e-08	2.34748e-07			FKBPL	0.446278	3.93601e-08	4.17225e-07
CHCHD2P9	0.821524	0.0110895	0.100071			NOL4L	-0.35358	8.51e-12	1.03e-10			MPHOSPH9	0.429793	1.86997e-08	2.35109e-07			LASP1	0.246568	3.95602e-08	4.19128e-07
DYNC1H1	0.237129	0.0110978	0.100081			DPH3	0.428421	8.53e-12	1.03e-10			TFE3	0.316961	1.87452e-08	2.35558e-07			CCT4	-0.233122	3.95962e-08	4.19291e-07
PLA2G12A	0.252366	0.0111029	0.100081			ZNF32	-0.597698	8.68e-12	1.05e-10			VGF	0.626191	1.87926e-08	2.36031e-07			RNF145	-0.302646	3.96574e-08	4.19721e-07
AKR1B10	0.607402	0.0111226	0.100202			TMED3	0.334701	8.73e-12	1.06e-10			AGK	-0.404726	1.89389e-08	2.37744e-07			WDR1	0.270895	3.98791e-08	4.21849e-07
PRDM9	1.65279	0.0111239	1			TOR1AIP2	0.341986	8.8e-12	1.06e-10			TMEM97	-0.291272	1.91054e-08	2.39711e-07			SNX18	-0.454974	4.07512e-08	4.30849e-07
AGO4	-0.242291	0.0111495	0.100389			SRGAP2C	0.507478	9.03e-12	1.09e-10			TRIP13	0.260291	1.91159e-08	2.39718e-07			PPP2R5B	-0.472088	4.14366e-08	4.37869e-07
C1QL1	-0.370399	0.0111775	0.100585			CASTOR2	0.723246	9.47e-12	1.15e-10			PBK	-0.405542	1.93643e-08	2.42706e-07			TGFBR3	-0.351064	4.15303e-08	4.38632e-07
C1orf226	-0.246393	0.0111843	0.10059			TMX2P1	0.775769	9.51e-12	1.15e-10			CDC25A	0.358072	1.96436e-08	2.46079e-07			CUTA	0.247505	4.20303e-08	4.43683e-07
ELAC1	-0.532583	0.0112187	0.100789			TKFC	-0.605563	9.51e-12	1.15e-10			RRBP1	0.256332	1.97186e-08	2.46713e-07			SPATA20	-0.40777	4.23897e-08	4.47245e-07
SSBP4	-0.289348	0.0112188	0.100789			TAB2	0.370677	9.57e-12	1.16e-10			ARPC5L	0.317795	1.97239e-08	2.46713e-07			ACTN1	0.24869	4.24723e-08	4.47884e-07
EFNA1	-0.258147	0.0112541	0.10105			FOXO3	-0.359833	9.84e-12	1.19e-10			NGDN	0.350727	1.97248e-08	2.46713e-07			ANAPC11	0.277908	4.27157e-08	4.50218e-07
AC022149.1	0.261148	0.0112643	0.101081			SC5D	0.353715	9.87e-12	1.19e-10			WNT2	1.86782	1.98053e-08	2.47495e-07			LEPR	0.474389	4.31337e-08	4.54388e-07
CACNA2D2	0.397605	0.0112701	0.101081			TCEAL9	0.275803	9.94e-12	1.2e-10			TMEM170A	0.450566	1.98078e-08	2.47495e-07			MTOR	0.322345	4.31753e-08	4.54591e-07
RB1-DT	5.1458	0.0112922	1			IPO13	-0.364791	1.01e-11	1.22e-10			FNDC10	-0.564126	2.02552e-08	2.52954e-07			CERCAM	-0.439359	4.35146e-08	4.57927e-07
LINC00240	0.455909	0.0113222	0.101492			MRPL14	0.301145	1.02e-11	1.22e-10			CCDC186	0.4614	2.04303e-08	2.55009e-07			TMEM26	-0.662578	4.36323e-08	4.58928e-07
AP003119.1	3.33709	0.0113519	1			SULF1	-0.330832	1.07e-11	1.29e-10			VPS72	-0.334046	2.05062e-08	2.55825e-07			PEX6	-0.402776	4.42128e-08	4.64592e-07
NEIL2	0.263956	0.0113572	0.10175			TENM3	0.301379	1.08e-11	1.3e-10			DCAF4L1	0.908915	2.07348e-08	2.58543e-07			OSBPL2	0.287714	4.42165e-08	4.64592e-07
AC005912.1	0.314888	0.0113791	0.10189			UTP4	0.279607	1.1e-11	1.32e-10			NAGK	0.286424	2.12677e-08	2.65051e-07			MALT1	0.375364	4.44244e-08	4.66537e-07
SPR	-0.237903	0.0113981	0.101958			FLYWCH1	0.337612	1.11e-11	1.34e-10			BRSK2	-0.596779	2.12813e-08	2.65079e-07			SNAPC1	0.568208	4.52365e-08	4.7482e-07
HGFAC	-0.573273	0.0113993	0.101958			PCDH17	2.65193	1.12e-11	1.35e-10			LTF	2.376	2.12919e-08	2.65079e-07			ACAP2	0.427783	4.5369e-08	4.75965e-07
LIMK2	-0.231525	0.0114627	0.102469			OSBPL2	0.29951	1.12e-11	1.35e-10			PTGIS	-0.772804	2.15074e-08	2.67624e-07			ZNF558	0.244509	4.54158e-08	4.76211e-07
HELB	0.342516	0.0114832	0.102552			GEMIN8P4	0.667918	1.13e-11	1.36e-10			AGL	-0.356647	2.18375e-08	2.71592e-07			SMG5	0.282409	4.54409e-08	4.76229e-07
STK38	-0.225981	0.0114847	0.102552			TM9SF2	0.268741	1.13e-11	1.36e-10			MCAM	-0.632785	2.19648e-08	2.73034e-07			ZNF800	0.332313	4.58452e-08	4.80219e-07
SLC19A2	0.256812	0.0114962	0.102599			TRIM14	-0.566335	1.13e-11	1.36e-10			C1QTNF6	-0.487666	2.27136e-08	2.82198e-07			PHF21A	-0.324587	4.59809e-08	4.81393e-07
GLI4	-0.31107	0.01153	0.102802			PTPN14	0.290809	1.14e-11	1.36e-10			RAB35	0.290986	2.27747e-08	2.82812e-07			GFPT1	0.320721	4.61183e-08	4.82583e-07
ARL6IP1	-0.253088	0.0115324	0.102802			ATP5MC2	-0.362562	1.15e-11	1.38e-10			ETF1	0.246861	2.28578e-08	2.83698e-07			IQSEC1	-0.432946	4.62366e-08	4.83573e-07
RORC	-1.44256	0.0115381	0.102802			DMTN	-0.541797	1.15e-11	1.38e-10			HMGB3	-0.293384	2.29971e-08	2.8528e-07			DKK2	-1.00697	4.62981e-08	4.83968e-07
AC090152.1	-0.407808	0.0115508	0.102847			CBLL1	0.284486	1.17e-11	1.39e-10			HSPA2	0.346065	2.31923e-08	2.87553e-07			NDRG3	0.253598	4.66971e-08	4.87887e-07
ENAH	0.235276	0.0115606	0.102847			PABPC1	-0.221639	1.17e-11	1.4e-10			ZBTB7C	1.51444	2.36145e-08	2.92638e-07			STIP1	0.240201	4.75512e-08	4.96556e-07
NAA30	-0.275794	0.0115621	0.102847			PLOD2	0.377414	1.18e-11	1.41e-10			MAP2K6	-0.650959	2.38481e-08	2.95381e-07			CLGN	0.592917	4.79514e-08	5.00479e-07
TNFRSF12A	-0.257365	0.0115702	0.102863			AGAP1	-0.615185	1.18e-11	1.41e-10			KRT18	0.288727	2.40409e-08	2.97617e-07			PAFAH2	-0.464014	4.85403e-08	5.06127e-07
DDX10	0.258414	0.0115829	0.102919			LFNG	-0.92445	1.22e-11	1.45e-10			ABCB7	-0.410105	2.41023e-08	2.98225e-07			H2AFZ	0.260806	4.85423e-08	5.06127e-07
ABHD11-AS1	-0.441473	0.0115956	0.102976			ATP2B1	-0.297472	1.23e-11	1.47e-10			PLCE1	-0.304815	2.4131e-08	2.98427e-07			DDAH1	-0.382487	4.91729e-08	5.1244e-07
TRAF3IP3	1.39386	0.011611	1			FAM32A	0.286522	1.24e-11	1.47e-10			PIK3CD	-0.522126	2.43899e-08	3.01474e-07			C5orf30	-0.398148	4.95487e-08	5.16092e-07
AL109976.1	-0.708002	0.0116446	0.103303			EDEM1	0.379527	1.24e-11	1.48e-10			PAQR7	-0.423098	2.48366e-08	3.06839e-07			ZNF638	-0.306709	4.96594e-08	5.16981e-07
ACCS	-0.249783	0.0116493	0.103303			NUP107	0.258822	1.25e-11	1.48e-10			TIMM29	0.324053	2.48886e-08	3.07324e-07			TNPO1	0.277466	4.98392e-08	5.18587e-07
ZNF624	-0.557974	0.0116516	0.103303			APLP2	0.228857	1.28e-11	1.52e-10			LONRF2	-0.297378	2.58641e-08	3.19206e-07			SRP19	0.467576	5.02641e-08	5.22742e-07
AC006378.2	0.80387	0.0116738	0.103443			CSGALNACT2	0.358177	1.28e-11	1.53e-10			RAPGEF1	-0.317458	2.63898e-08	3.25529e-07			ERAL1	-0.594264	5.0728e-08	5.27297e-07
CERCAM	-0.281393	0.011693	0.103556			VPS72	-0.372713	1.29e-11	1.53e-10			LIPC	-0.729211	2.64789e-08	3.26461e-07			PDGFD	-0.368657	5.15988e-08	5.36075e-07
MMP15	-0.607457	0.0117002	0.103563			ASH1L	0.268776	1.3e-11	1.54e-10			RPS15A	-0.250245	2.6584e-08	3.27589e-07			ANKRD17	0.265994	5.19266e-08	5.39205e-07
ZNF664	-0.236534	0.0117391	0.103851			NDUFB10	-0.347734	1.31e-11	1.56e-10			NPTX2	0.60489	2.67906e-08	3.29967e-07			ORC5	-0.304159	5.21797e-08	5.41557e-07
AC007383.2	-0.799189	0.0117498	0.103889			SCYL1	0.30109	1.32e-11	1.57e-10			GSDME	-0.615562	2.69429e-08	3.31673e-07			WSB2	0.326883	5.22706e-08	5.42225e-07
RSRC1	-0.299643	0.01177	0.104011			DEGS1	-0.259271	1.33e-11	1.58e-10			UGGT2	0.341958	2.72256e-08	3.34983e-07			MED1	0.325771	5.24016e-08	5.43307e-07
AL031864.1	1.27645	0.0117762	1			DUXAP10	-0.446627	1.33e-11	1.58e-10			OXCT1	-0.396012	2.76447e-08	3.39967e-07			FOXP4	-0.371875	5.28198e-08	5.47364e-07
PBXIP1	-0.269947	0.0117784	0.104028			ZBED5	-0.405682	1.35e-11	1.6e-10			CIB1	0.357996	2.76671e-08	3.40069e-07			SPTBN2	-0.38781	5.30853e-08	5.49835e-07
CDH18	-0.352184	0.0117874	0.104052			EFHD1	-1.15947	1.36e-11	1.61e-10			PDZD4	-0.657712	2.7781e-08	3.41296e-07			PLCD1	0.757113	5.32259e-08	5.51012e-07
NCOA1	-0.275082	0.0117989	0.104054			WDR11	-0.418967	1.36e-11	1.61e-10			DBNDD1	-0.385149	2.83069e-08	3.4758e-07			PPP1R12C	-0.392061	5.33089e-08	5.5159e-07
ZFPL1	0.34388	0.0118005	0.104054			GANAB	0.222581	1.37e-11	1.62e-10			RPL15	-0.219296	2.88934e-08	3.54601e-07			PQLC3	-0.743064	5.45473e-08	5.64117e-07
POMK	0.540061	0.0118146	0.104122			FUCA1	0.486211	1.37e-11	1.62e-10			XRCC6	0.242304	2.8921e-08	3.54759e-07			TENT5C	0.942695	5.52714e-08	5.71315e-07
ICA1L	-0.318861	0.0118239	0.104147			LINC01297	-0.785258	1.38e-11	1.63e-10			SPEG	-0.761716	2.89879e-08	3.554e-07			SMTN	0.448239	5.53861e-08	5.7221e-07
PHF7	0.319207	0.0118425	0.104151			NAA35	0.414678	1.38e-11	1.63e-10			PFAS	-0.318177	2.91464e-08	3.57161e-07			UACA	-0.428179	5.56384e-08	5.74526e-07
IP6K2	-0.23649	0.0118445	0.104151			CERCAM	-0.492764	1.39e-11	1.64e-10			TUG1	-0.29761	2.96053e-08	3.62602e-07			DUS1L	-0.342541	5.60853e-08	5.78681e-07
KDELR3	-0.426201	0.0118455	0.104151			SLC39A8	0.393793	1.44e-11	1.7e-10			CARD10	-0.474579	2.96543e-08	3.63017e-07			LCN2	0.982957	5.60976e-08	5.78681e-07
SCN11A	-0.868329	0.0118501	0.104151			RHEBP2	0.626785	1.44e-11	1.7e-10			SP1	0.244001	2.98022e-08	3.64643e-07			NUDT2	0.416986	5.68746e-08	5.86398e-07
FAM69B	-0.358472	0.0118693	0.104263			HDHD5	-0.589701	1.45e-11	1.72e-10			MAP2K3	0.334515	2.991e-08	3.65777e-07			ANKFN1	2.94807	5.7195e-08	5.89404e-07
ADPGK	0.228547	0.0118813	0.104299			MARCKSL1	-0.252542	1.48e-11	1.75e-10			FBXO38	0.30082	3.01357e-08	3.6835e-07			LRRC41	0.241292	5.73596e-08	5.90801e-07
AC005387.2	1.15392	0.0118862	0.104299			SLC6A8	-0.280347	1.51e-11	1.78e-10			NOV	0.645671	3.01585e-08	3.68443e-07			POLD2	-0.369266	5.75144e-08	5.92096e-07
CD86	2.6882	0.0118937	1			SEC63	0.306331	1.53e-11	1.8e-10			2025-09-09	-0.279217	3.03461e-08	3.70548e-07			NUP214	0.265946	5.7672e-08	5.93418e-07
SLIRP	0.242803	0.0119418	0.104729			CXCL1	1.03122	1.54e-11	1.82e-10			CAV2	-0.647876	3.06068e-08	3.73542e-07			WARS	0.260476	5.792e-08	5.95669e-07
ISCU	0.196847	0.0119643	0.104871			TMEM125	-0.663489	1.59e-11	1.87e-10			PDLIM2	-0.574287	3.06775e-08	3.74216e-07			LAMB1	-0.393739	5.83797e-08	6.00094e-07
SDF2L1	0.337892	0.0119736	0.104895			IDE	0.324136	1.59e-11	1.87e-10			STIP1	0.232505	3.07847e-08	3.75334e-07			LRIG1	-0.34209	5.99131e-08	6.15545e-07
AC144568.1	3.77808	0.0119884	1			TRIM16L	0.562533	1.61e-11	1.89e-10			COA3	-0.550678	3.09776e-08	3.77495e-07			SAMD5	-0.926305	6.02811e-08	6.19014e-07
RTN4R	-0.519355	0.012003	0.105096			H1FX	-0.478079	1.61e-11	1.89e-10			EIF3E	-0.243221	3.11693e-08	3.7964e-07			CDKN2AIPNL	-0.731775	6.17004e-08	6.33268e-07
SSPO	-0.502363	0.0120097	0.105098			HMGN5	0.603198	1.63e-11	1.91e-10			SELENOT	0.281623	3.15372e-08	3.83928e-07			SLC25A51	0.574242	6.27845e-08	6.44071e-07
DMP1	5.11459	0.0120136	1			PLPPR2	0.278696	1.63e-11	1.92e-10			ZFP64	-0.321835	3.21146e-08	3.9076e-07			CASTOR2	0.708183	6.29723e-08	6.45672e-07
KANK1	-0.193046	0.0120268	0.105167			POLR2A	0.262074	1.66e-11	1.94e-10			OVGP1	0.792309	3.30076e-08	4.01417e-07			SOGA1	-0.280044	6.35932e-08	6.5171e-07
LINC02018	1.20857	0.0120306	0.105167			CCDC24	-0.537357	1.7e-11	2e-10			UBE2K	0.35132	3.30236e-08	4.01417e-07			MTIF2	-0.312184	6.40704e-08	6.5627e-07
TMEM136	-0.268925	0.0120694	0.10545			RLF	0.340685	1.7e-11	2e-10			CTPS2	-0.440795	3.32065e-08	4.03436e-07			MRFAP1	-0.218278	6.42572e-08	6.57852e-07
POTEM	0.600748	0.0120797	0.105482			FAF2	0.239491	1.73e-11	2.03e-10			UBTF	-0.296996	3.32504e-08	4.03767e-07			USP36	0.258106	6.49561e-08	6.64674e-07
AC127496.7	-0.561814	0.0120962	0.10557			TRMT2B	0.335208	1.78e-11	2.09e-10			SLC11A2	-0.278633	3.32685e-08	4.03783e-07			SLC9A2	-0.428885	6.51141e-08	6.65956e-07
C2orf91	1.43241	0.0121311	1			IL17RC	-0.500532	1.8e-11	2.1e-10			ESPN	-0.595108	3.33811e-08	4.04888e-07			FLT4	-1.58977	6.69918e-08	6.84816e-07
SNRNP25	0.255771	0.0121603	0.106072			NAPB	0.482032	1.89e-11	2.21e-10			KCTD13	0.423948	3.33995e-08	4.04888e-07			SLC19A2	0.459441	6.80737e-08	6.95526e-07
CRY1	0.285024	0.0121733	0.106089			LRRC20	-0.470812	1.89e-11	2.21e-10			MED10	0.262158	3.34097e-08	4.04888e-07			ESYT1	0.243461	6.82077e-08	6.96547e-07
HCLS1	0.460419	0.012178	0.106089			LOXL1	-0.769172	1.91e-11	2.23e-10			CHI3L1	-0.517182	3.39652e-08	4.11413e-07			SBDSP1	0.478037	6.86453e-08	7.00664e-07
RMST	1.29928	0.0121819	0.106089			PIM3	0.456843	1.99e-11	2.33e-10			DDX17	-0.217043	3.47113e-08	4.2021e-07			MED16	-0.484128	6.9455e-08	7.08574e-07
AP001360.2	3.14325	0.0121967	1			PDIA3	0.297365	1.99e-11	2.33e-10			SPRY4	0.902097	3.47304e-08	4.2021e-07			ELAC2	0.327739	6.95321e-08	7.09004e-07
HSBP1L1	-0.315905	0.0122035	0.10622			ARHGEF2	0.246032	2.01e-11	2.34e-10			SLC4A2	-0.271586	3.47437e-08	4.2021e-07			SPATA2	0.319171	7.0042e-08	7.13847e-07
[truncated: 7,777 more rows]

## Sheet: Supplementary_Table_3
All treatments vs control - intersected Reactome pathways (upregulated) - P values shown for 11KDHT treatment												11KT, DHT, 11KDHT vs control - intersected Reactome pathways (upregulated) - P values shown for 11KDHT treatment
ReactomeID	Description	GeneRatio	BgRatio	pvalue	padj	geneID	geneName	EntrezID	Count			ReactomeID	Description	GeneRatio	BgRatio	pvalue	padj	geneID	geneName	EntrezID	Count
R-HSA-9759194	Nuclear events mediated by NFE2L2	63/2538	95/9921	6.3e-17	4.78e-14	ENSG00000197063/ENSG00000198517/ENSG00000126067/ENSG00000198431/ENSG00000151012/ENSG00000277791/ENSG00000177156/ENSG00000143106/ENSG00000161011/ENSG00000163636/ENSG00000013275/ENSG00000117450/ENSG00000023909/ENSG00000115233/ENSG00000150991/ENSG00000100292/ENSG00000087191/ENSG00000138413/ENSG00000271303/ENSG00000104687/ENSG00000108671/ENSG00000100764/ENSG00000100804/ENSG00000175166/ENSG00000099341…	MAFG/MAFK/PSMB2/TXNRD1/SLC7A11/PSMB3/TALDO1/PSMA5/SQSTM1/PSMD6/PSMC4/PRDX1/GCLM/PSMD14/UBC/HMOX1/PSMC5/IDH1/SRXN1/GSR/PSMD11/PSMC1/PSMB5/PSMD2/PSMD8/BACH1/PSMA3/PSMA4/GSK3B/PSMC6/KEAP1/PSMA7/SP1/RELA/PSMB7/TXN/UBB/ME1/PSMD4/PSMC2/PSMD13/PSME3/G6PD/SKP1/ABCC1/NFE2L2/PSMD7/PSMB4/AREG/ABCG2/PSMD9/PSMC3/PSMB10/PSMA6/PSME2/ABCF2/CCL2/EGF/PSMD12/NFKB1/ATF4/GCLC/TKT	4097/7975/5690/7296/23657/5691/6888/5686/8878/9861/5704/5052/2730/10213/7316/3162/5705/3417/140809/2936/5717/5700/5693/5708/5714/571/5684/5685/2932/5706/9817/5688/6667/5970/5695/7295/7314/4199/5710/5701/5719/10197/2539/6500/4363/4780/5713/5692/374/9429/5715/5702/5699/5687/5721/10061/6347/1950/5718/4790/468/2729/7086	63			R-HSA-2467813	Separation of Sister Chromatids	101/2538	187/9921	6.03e-17	4.78e-14	ENSG00000126067/ENSG00000277791/ENSG00000197102/ENSG00000143106/ENSG00000068878/ENSG00000188229/ENSG00000158560/ENSG00000163636/ENSG00000149503/ENSG00000130779/ENSG00000013275/ENSG00000115233/ENSG00000150991/ENSG00000087191/ENSG00000175063/ENSG00000108671/ENSG00000166579/ENSG00000100764/ENSG00000100804/ENSG00000175166/ENSG00000167553/ENSG00000099341/ENSG00000100567/ENSG00000113575/ENSG00000041357…	PSMB2/PSMB3/DYNC1H1/PSMA5/PSME4/TUBB4B/DYNC1I1/PSMD6/INCENP/CLIP1/PSMC4/PSMD14/UBC/PSMC5/UBE2C/PSMD11/NDEL1/PSMC1/PSMB5/PSMD2/TUBA1C/PSMD8/PSMA3/PPP2CA/PSMA4/DYNC1LI1/PSMC6/SKA1/TUBB2A/PSMA7/UBE2S/PSMB7/PAFAH1B1/UBB/BUB1/KIF2C/ANAPC11/PPP2R1B/SEC13/CDC23/PSMD4/NUP107/CDCA5/PSMC2/PSMD13/CDC27/PPP2CB/RANBP2/PSME3/TUBA4A/TAOK1/CENPI/CKAP5/NUP133/SMC3/SGO1/CENPN/NUP98/PSMD7/TUBB2B/SEH1L/AHCTF1/PSMB4/…	5690/5691/1778/5686/23198/10383/1780/9861/3619/6249/5704/10213/7316/5705/11065/5717/81565/5700/5693/5708/84790/5714/5684/5515/5685/51143/5706/220134/7280/5688/27338/5695/5048/7314/699/11004/51529/5519/6396/8697/5710/57122/113130/5701/5719/996/5516/5903/10197/7277/57551/2491/9793/55746/9126/151648/55839/4928/5713/347733/81929/25909/5692/22919/10726/147841/10274/1060/5715/5702/11243/5699/9184/10393…	101
R-HSA-9755511	KEAP1-NFE2L2 pathway	75/2538	124/9921	1.58e-16	7.97e-14	ENSG00000197063/ENSG00000198517/ENSG00000126067/ENSG00000198431/ENSG00000151012/ENSG00000165280/ENSG00000130766/ENSG00000277791/ENSG00000177156/ENSG00000182446/ENSG00000143106/ENSG00000161011/ENSG00000068878/ENSG00000163636/ENSG00000013275/ENSG00000117450/ENSG00000023909/ENSG00000115233/ENSG00000150991/ENSG00000140941/ENSG00000100292/ENSG00000087191/ENSG00000138413/ENSG00000271303/ENSG00000104687…	MAFG/MAFK/PSMB2/TXNRD1/SLC7A11/VCP/SESN2/PSMB3/TALDO1/NPLOC4/PSMA5/SQSTM1/PSME4/PSMD6/PSMC4/PRDX1/GCLM/PSMD14/UBC/MAP1LC3B/HMOX1/PSMC5/IDH1/SRXN1/GSR/PSMD11/PSMC1/PSMB5/PSMD2/PSMD8/UFD1/BACH1/PSMA3/PSMA4/GSK3B/PSMC6/KEAP1/UBXN7/EIF2AK3/PSMA7/SP1/RELA/PSMB7/TXN/UBB/ME1/PSMD4/PSMC2/DPP3/PSMD13/PSME3/G6PD/SKP1/ABCC1/NFE2L2/PSMD7/PSMB4/AREG/ABCG2/PSMD9/PSMC3/PSMB10/PSMA6/CSNK2A1/PSME2/PRKCD/ABCF2/CCL…	4097/7975/5690/7296/23657/7415/83667/5691/6888/55666/5686/8878/23198/9861/5704/5052/2730/10213/7316/81631/3162/5705/3417/140809/2936/5717/5700/5693/5708/5714/7353/571/5684/5685/2932/5706/9817/26043/9451/5688/6667/5970/5695/7295/7314/4199/5710/5701/10072/5719/10197/2539/6500/4363/4780/5713/5692/374/9429/5715/5702/5699/5687/1457/5721/5580/10061/6347/1950/5718/4790/468/2729/122706/7086	75			R-HSA-9759194	Nuclear events mediated by NFE2L2	63/2538	95/9921	6.3e-17	4.78e-14	ENSG00000197063/ENSG00000198517/ENSG00000126067/ENSG00000198431/ENSG00000151012/ENSG00000277791/ENSG00000177156/ENSG00000143106/ENSG00000161011/ENSG00000163636/ENSG00000013275/ENSG00000117450/ENSG00000023909/ENSG00000115233/ENSG00000150991/ENSG00000100292/ENSG00000087191/ENSG00000138413/ENSG00000271303/ENSG00000104687/ENSG00000108671/ENSG00000100764/ENSG00000100804/ENSG00000175166/ENSG00000099341…	MAFG/MAFK/PSMB2/TXNRD1/SLC7A11/PSMB3/TALDO1/PSMA5/SQSTM1/PSMD6/PSMC4/PRDX1/GCLM/PSMD14/UBC/HMOX1/PSMC5/IDH1/SRXN1/GSR/PSMD11/PSMC1/PSMB5/PSMD2/PSMD8/BACH1/PSMA3/PSMA4/GSK3B/PSMC6/KEAP1/PSMA7/SP1/RELA/PSMB7/TXN/UBB/ME1/PSMD4/PSMC2/PSMD13/PSME3/G6PD/SKP1/ABCC1/NFE2L2/PSMD7/PSMB4/AREG/ABCG2/PSMD9/PSMC3/PSMB10/PSMA6/PSME2/ABCF2/CCL2/EGF/PSMD12/NFKB1/ATF4/GCLC/TKT	4097/7975/5690/7296/23657/5691/6888/5686/8878/9861/5704/5052/2730/10213/7316/3162/5705/3417/140809/2936/5717/5700/5693/5708/5714/571/5684/5685/2932/5706/9817/5688/6667/5970/5695/7295/7314/4199/5710/5701/5719/10197/2539/6500/4363/4780/5713/5692/374/9429/5715/5702/5699/5687/5721/10061/6347/1950/5718/4790/468/2729/7086	63
R-HSA-176409	APC/C:Cdc20 mediated degradation of mitotic proteins	48/2538	75/9921	2.37e-12	4e-10	ENSG00000133101/ENSG00000126067/ENSG00000277791/ENSG00000143106/ENSG00000068878/ENSG00000163636/ENSG00000013275/ENSG00000115233/ENSG00000150991/ENSG00000087191/ENSG00000175063/ENSG00000108671/ENSG00000100764/ENSG00000100804/ENSG00000175166/ENSG00000099341/ENSG00000100567/ENSG00000041357/ENSG00000100519/ENSG00000101182/ENSG00000108106/ENSG00000136930/ENSG00000170315/ENSG00000141552/ENSG00000094880…	CCNA1/PSMB2/PSMB3/PSMA5/PSME4/PSMD6/PSMC4/PSMD14/UBC/PSMC5/UBE2C/PSMD11/PSMC1/PSMB5/PSMD2/PSMD8/PSMA3/PSMA4/PSMC6/PSMA7/UBE2S/PSMB7/UBB/ANAPC11/CDC23/PSMD4/PSMC2/PSMD13/CDC27/CCNB1/PSME3/PSMD7/PSMB4/PSMD9/PSMC3/PSMB10/BUB3/ANAPC10/PSMA6/PTTG1/PSME2/ANAPC2/PSMD12/CDC20/ANAPC15/PSMB11/MAD2L1/ANAPC4	8900/5690/5691/5686/23198/9861/5704/10213/7316/5705/11065/5717/5700/5693/5708/5714/5684/5685/5706/5688/27338/5695/7314/51529/8697/5710/5701/5719/996/891/10197/5713/5692/5715/5702/5699/9184/10393/5687/9232/5721/29882/5718/991/25906/122706/4085/29945	48			R-HSA-9755511	KEAP1-NFE2L2 pathway	75/2538	124/9921	1.58e-16	7.97e-14	ENSG00000197063/ENSG00000198517/ENSG00000126067/ENSG00000198431/ENSG00000151012/ENSG00000165280/ENSG00000130766/ENSG00000277791/ENSG00000177156/ENSG00000182446/ENSG00000143106/ENSG00000161011/ENSG00000068878/ENSG00000163636/ENSG00000013275/ENSG00000117450/ENSG00000023909/ENSG00000115233/ENSG00000150991/ENSG00000140941/ENSG00000100292/ENSG00000087191/ENSG00000138413/ENSG00000271303/ENSG00000104687…	MAFG/MAFK/PSMB2/TXNRD1/SLC7A11/VCP/SESN2/PSMB3/TALDO1/NPLOC4/PSMA5/SQSTM1/PSME4/PSMD6/PSMC4/PRDX1/GCLM/PSMD14/UBC/MAP1LC3B/HMOX1/PSMC5/IDH1/SRXN1/GSR/PSMD11/PSMC1/PSMB5/PSMD2/PSMD8/UFD1/BACH1/PSMA3/PSMA4/GSK3B/PSMC6/KEAP1/UBXN7/EIF2AK3/PSMA7/SP1/RELA/PSMB7/TXN/UBB/ME1/PSMD4/PSMC2/DPP3/PSMD13/PSME3/G6PD/SKP1/ABCC1/NFE2L2/PSMD7/PSMB4/AREG/ABCG2/PSMD9/PSMC3/PSMB10/PSMA6/CSNK2A1/PSME2/PRKCD/ABCF2/CCL…	4097/7975/5690/7296/23657/7415/83667/5691/6888/55666/5686/8878/23198/9861/5704/5052/2730/10213/7316/81631/3162/5705/3417/140809/2936/5717/5700/5693/5708/5714/7353/571/5684/5685/2932/5706/9817/26043/9451/5688/6667/5970/5695/7295/7314/4199/5710/5701/10072/5719/10197/2539/6500/4363/4780/5713/5692/374/9429/5715/5702/5699/5687/1457/5721/5580/10061/6347/1950/5718/4790/468/2729/122706/7086	75
R-HSA-176814	Activation of APC/C and APC/C:Cdc20 mediated degradation of mitotic proteins	48/2538	76/9921	4.85e-12	5.73e-10	ENSG00000133101/ENSG00000126067/ENSG00000277791/ENSG00000143106/ENSG00000068878/ENSG00000163636/ENSG00000013275/ENSG00000115233/ENSG00000150991/ENSG00000087191/ENSG00000175063/ENSG00000108671/ENSG00000100764/ENSG00000100804/ENSG00000175166/ENSG00000099341/ENSG00000100567/ENSG00000041357/ENSG00000100519/ENSG00000101182/ENSG00000108106/ENSG00000136930/ENSG00000170315/ENSG00000141552/ENSG00000094880…	CCNA1/PSMB2/PSMB3/PSMA5/PSME4/PSMD6/PSMC4/PSMD14/UBC/PSMC5/UBE2C/PSMD11/PSMC1/PSMB5/PSMD2/PSMD8/PSMA3/PSMA4/PSMC6/PSMA7/UBE2S/PSMB7/UBB/ANAPC11/CDC23/PSMD4/PSMC2/PSMD13/CDC27/CCNB1/PSME3/PSMD7/PSMB4/PSMD9/PSMC3/PSMB10/BUB3/ANAPC10/PSMA6/PTTG1/PSME2/ANAPC2/PSMD12/CDC20/ANAPC15/PSMB11/MAD2L1/ANAPC4	8900/5690/5691/5686/23198/9861/5704/10213/7316/5705/11065/5717/5700/5693/5708/5714/5684/5685/5706/5688/27338/5695/7314/51529/8697/5710/5701/5719/996/891/10197/5713/5692/5715/5702/5699/9184/10393/5687/9232/5721/29882/5718/991/25906/122706/4085/29945	48			R-HSA-162906	HIV Infection	111/2538	228/9921	2.85e-14	1.08e-11	ENSG00000126067/ENSG00000277791/ENSG00000143106/ENSG00000068878/ENSG00000163636/ENSG00000013275/ENSG00000115233/ENSG00000150991/ENSG00000101146/ENSG00000087191/ENSG00000064313/ENSG00000174405/ENSG00000108671/ENSG00000155975/ENSG00000100764/ENSG00000100804/ENSG00000175166/ENSG00000086065/ENSG00000099341/ENSG00000112592/ENSG00000166747/ENSG00000137947/ENSG00000141971/ENSG00000105656/ENSG00000100567…	PSMB2/PSMB3/PSMA5/PSME4/PSMD6/PSMC4/PSMD14/UBC/RAE1/PSMC5/TAF2/LIG4/PSMD11/VPS37A/PSMC1/PSMB5/PSMD2/CHMP5/PSMD8/TBP/AP1G1/GTF2B/MVB12A/ELL/PSMA3/PSMA4/CHMP7/PSMC6/GTF2A1/PSMA7/NELFE/NUP153/PSMB7/ATP6V1H/POLR2A/ARF1/XRCC6/UBB/HLA-A/B2M/TAF7/SUPT5H/NUP214/SEC13/PSMD4/ELOC/SLC25A4/NUP107/CHMP2B/GTF2E2/PSMC2/TAF13/PSMD13/GTF2A2/TAF12/POLR2C/RANBP2/PSME3/SKP1/NUP188/TSG101/XRCC5/NUP133/NUP98/PSMD7/NED…	5690/5691/5686/23198/9861/5704/10213/7316/8480/5705/6873/3981/5717/137492/5700/5693/5708/51510/5714/6908/164/2959/93343/8178/5684/5685/91782/5706/2957/5688/7936/9972/5695/51606/5430/375/2547/7314/3105/567/6879/6829/8021/6396/5710/6921/291/57122/25978/2961/5701/6884/5719/2958/6883/5432/5903/10197/6500/23511/7251/7520/55746/4928/5713/23327/1022/9631/8812/5440/904/81929/163/5692/27243/5435/6924/5715…	111
R-HSA-69052	Switching of origins to a post-replicative state	50/2538	91/9921	2.07e-09	6.03e-08	ENSG00000133101/ENSG00000126067/ENSG00000277791/ENSG00000143106/ENSG00000068878/ENSG00000163636/ENSG00000013275/ENSG00000115233/ENSG00000150991/ENSG00000087191/ENSG00000175063/ENSG00000108671/ENSG00000100764/ENSG00000100804/ENSG00000175166/ENSG00000099341/ENSG00000100567/ENSG00000041357/ENSG00000100519/ENSG00000101182/ENSG00000091651/ENSG00000085840/ENSG00000108106/ENSG00000136930/ENSG00000170315…	CCNA1/PSMB2/PSMB3/PSMA5/PSME4/PSMD6/PSMC4/PSMD14/UBC/PSMC5/UBE2C/PSMD11/PSMC1/PSMB5/PSMD2/PSMD8/PSMA3/PSMA4/PSMC6/PSMA7/ORC6/ORC1/UBE2S/PSMB7/UBB/GMNN/ANAPC11/CDC23/PSMD4/PSMC2/PSMD13/CDC27/PSME3/SKP1/MCM8/PSMD7/PSMB4/PSMD9/PSMC3/PSMB10/ANAPC10/PSMA6/MCM7/PSME2/ANAPC2/PSMD12/MCM4/ANAPC15/PSMB11/ANAPC4	8900/5690/5691/5686/23198/9861/5704/10213/7316/5705/11065/5717/5700/5693/5708/5714/5684/5685/5706/5688/23594/4998/27338/5695/7314/51053/51529/8697/5710/5701/5719/996/10197/6500/84515/5713/5692/5715/5702/5699/10393/5687/4176/5721/29882/5718/4173/25906/122706/29945	50			R-HSA-446203	Asparagine N-linked glycosylation	133/2538	293/9921	7.6e-14	2.31e-11	ENSG00000196352/ENSG00000204386/ENSG00000158850/ENSG00000135346/ENSG00000165280/ENSG00000167110/ENSG00000179218/ENSG00000197102/ENSG00000188229/ENSG00000158560/ENSG00000150991/ENSG00000109861/ENSG00000088298/ENSG00000136731/ENSG00000136986/ENSG00000242247/ENSG00000145495/ENSG00000113615/ENSG00000150961/ENSG00000095139/ENSG00000167004/ENSG00000100764/ENSG00000064601/ENSG00000070526/ENSG00000167553…	CD55/NEU1/B4GALT3/CGA/VCP/GOLGA2/CALR/DYNC1H1/TUBB4B/DYNC1I1/UBC/CTSC/EDEM2/UGGT1/DERL1/ARFGAP3/MARCHF6/SEC24A/SEC24D/ARCN1/PDIA3/PSMC1/CTSA/ST6GALNAC1/TUBA1C/PMM1/COG5/RPN2/CANX/TMED9/ST3GAL1/RAD23B/CMAS/MGAT4A/DYNC1LI1/OS9/DOLPP1/TMED3/MIA3/ALG13/YKT6/TUBB2A/DCTN4/MAN1A2/SEL1L/COPG1/MOGS/GANAB/ARF1/EDEM1/NAGK/UBB/GLB1/UGGT2/FUCA1/TMED10/MGAT1/ARF4/GFPT1/B4GALT5/ST3GAL6/LMAN1/SEC13/SEC31A/EDEM3/…	1604/4758/8703/1081/7415/2801/811/1778/10383/1780/7316/1075/55741/56886/79139/26286/10299/10802/9871/372/2923/5700/5476/55808/84790/5372/10466/6185/821/54732/6482/5887/55907/11320/51143/10956/57171/23423/375056/79868/10652/7280/51164/10905/6400/22820/7841/23193/375/9695/55577/7314/2720/55757/2517/10972/4245/378/2673/9334/10402/3998/6396/22872/80267/10342/2804/9632/9919/9554/4905/288/57511/8774/87…	133
R-HSA-3371497	HSP90 chaperone cycle for steroid hormone receptors (SHR) in the presence of ligand	29/2538	53/9921	5.63e-06	6.52e-05	ENSG00000132002/ENSG00000197102/ENSG00000188229/ENSG00000158560/ENSG00000096060/ENSG00000080824/ENSG00000167553/ENSG00000126803/ENSG00000144635/ENSG00000137267/ENSG00000132912/ENSG00000069345/ENSG00000204390/ENSG00000204388/ENSG00000168439/ENSG00000169083/ENSG00000204389/ENSG00000127824/ENSG00000096384/ENSG00000137285/ENSG00000104671/ENSG00000086061/ENSG00000109971/ENSG00000110958/ENSG00000116489…	DNAJB1/DYNC1H1/TUBB4B/DYNC1I1/FKBP5/HSP90AA1/TUBA1C/HSPA2/DYNC1LI1/TUBB2A/DCTN4/DNAJA2/HSPA1L/HSPA1B/STIP1/AR/HSPA1A/TUBA4A/HSP90AB1/TUBB2B/DCTN6/DNAJA1/HSPA8/PTGES3/CAPZA1/TUBB4A/TUBB3/ACTR1A/DCTN2	3337/1778/10383/1780/2289/3320/84790/3306/51143/7280/51164/10294/3305/3304/10963/367/3303/7277/3326/347733/10671/3301/3312/10728/829/10382/10381/10121/10540	29			R-HSA-983169	Class I MHC mediated antigen processing & presentation	159/2538	371/9921	1.2e-13	2.75e-11	ENSG00000044574/ENSG00000126067/ENSG00000135047/ENSG00000277791/ENSG00000127481/ENSG00000179218/ENSG00000143106/ENSG00000068878/ENSG00000163636/ENSG00000013275/ENSG00000185825/ENSG00000115233/ENSG00000162413/ENSG00000150991/ENSG00000116514/ENSG00000124226/ENSG00000087191/ENSG00000110344/ENSG00000175063/ENSG00000204525/ENSG00000113615/ENSG00000108671/ENSG00000150961/ENSG00000167004/ENSG00000100764…	HSPA5/PSMB2/CTSL/PSMB3/UBR4/CALR/PSMA5/PSME4/PSMD6/PSMC4/BCAP31/PSMD14/KLHL21/UBC/RNF19B/RNF114/PSMC5/UBE4A/UBE2C/HLA-C/SEC24A/PSMD11/SEC24D/PDIA3/PSMC1/PSMB5/PSMD2/FBXO21/TAP1/UBE2A/UBE2M/PSMD8/TLR6/UBE2K/GAN/PSMA3/CANX/TRIM37/TRIM36/KBTBD8/SOCS3/PSMA4/HECTD1/WWP1/PSMC6/KEAP1/PSMA7/CTSS/FBXO30/HUWE1/UBE2S/PSMB7/RLIM/UBB/TAP2/HLA-A/B2M/ERAP2/ANAPC11/LRRC41/WSB1/SEC13/CDC23/HERC5/SEC31A/PSMD4/CDC3…	3309/5690/1514/5691/23352/811/5686/23198/9861/5704/10134/10213/9903/7316/127544/55905/5705/9354/11065/3107/10802/5717/9871/2923/5700/5693/5708/23014/6890/7319/9040/5714/10333/3093/8139/5684/821/4591/55521/84541/9021/5685/25831/11059/5706/9817/5688/1520/84085/10075/27338/5695/51132/7314/6891/3105/567/64167/51529/10489/26118/6396/8697/51191/22872/5710/997/6921/9632/3133/9554/5701/83737/9730/9867/57…	159
R-HSA-3371568	Attenuation phase	1938-10-01	14/9921	0.000414696	0.00336413	ENSG00000132002/ENSG00000080824/ENSG00000126803/ENSG00000204390/ENSG00000204388/ENSG00000204389/ENSG00000096384/ENSG00000109971/ENSG00000110958/ENSG00000185122	DNAJB1/HSP90AA1/HSPA2/HSPA1L/HSPA1B/HSPA1A/HSP90AB1/HSPA8/PTGES3/HSF1	3337/3320/3306/3305/3304/3303/3326/3312/10728/3297	10			R-HSA-68882	Mitotic Anaphase	111/2538	232/9921	1.27e-13	2.75e-11	ENSG00000126067/ENSG00000277791/ENSG00000197102/ENSG00000143106/ENSG00000068878/ENSG00000188229/ENSG00000158560/ENSG00000163636/ENSG00000149503/ENSG00000130779/ENSG00000013275/ENSG00000115233/ENSG00000150991/ENSG00000087191/ENSG00000175063/ENSG00000108671/ENSG00000166579/ENSG00000100764/ENSG00000100804/ENSG00000175166/ENSG00000167553/ENSG00000099341/ENSG00000100567/ENSG00000113575/ENSG00000160789…	PSMB2/PSMB3/DYNC1H1/PSMA5/PSME4/TUBB4B/DYNC1I1/PSMD6/INCENP/CLIP1/PSMC4/PSMD14/UBC/PSMC5/UBE2C/PSMD11/NDEL1/PSMC1/PSMB5/PSMD2/TUBA1C/PSMD8/PSMA3/PPP2CA/LMNA/PSMA4/DYNC1LI1/CHMP7/PSMC6/SKA1/TUBB2A/PSMA7/UBE2S/PSMB7/PAFAH1B1/UBB/BUB1/KIF2C/ANAPC11/TNPO1/PPP2R1B/SEC13/CDC23/PPP2R2A/PSMD4/NUP107/CDCA5/CHMP2B/PSMC2/PSMD13/CDC27/PPP2CB/CCNB1/RANBP2/PSME3/TUBA4A/TAOK1/CENPI/NUP188/CKAP5/NUP133/SMC3/SGO1…	5690/5691/1778/5686/23198/10383/1780/9861/3619/6249/5704/10213/7316/5705/11065/5717/81565/5700/5693/5708/84790/5714/5684/5515/4000/5685/51143/91782/5706/220134/7280/5688/27338/5695/5048/7314/699/11004/51529/3842/5519/6396/8697/5520/5710/57122/113130/25978/5701/5719/996/5516/891/5903/10197/7277/57551/2491/23511/9793/55746/9126/151648/55839/4928/5713/9631/347733/81929/25909/5692/22919/27243/10726/1…	111
												R-HSA-2555396	Mitotic Metaphase and Anaphase	111/2538	233/9921	1.82e-13	3.46e-11	ENSG00000126067/ENSG00000277791/ENSG00000197102/ENSG00000143106/ENSG00000068878/ENSG00000188229/ENSG00000158560/ENSG00000163636/ENSG00000149503/ENSG00000130779/ENSG00000013275/ENSG00000115233/ENSG00000150991/ENSG00000087191/ENSG00000175063/ENSG00000108671/ENSG00000166579/ENSG00000100764/ENSG00000100804/ENSG00000175166/ENSG00000167553/ENSG00000099341/ENSG00000100567/ENSG00000113575/ENSG00000160789…	PSMB2/PSMB3/DYNC1H1/PSMA5/PSME4/TUBB4B/DYNC1I1/PSMD6/INCENP/CLIP1/PSMC4/PSMD14/UBC/PSMC5/UBE2C/PSMD11/NDEL1/PSMC1/PSMB5/PSMD2/TUBA1C/PSMD8/PSMA3/PPP2CA/LMNA/PSMA4/DYNC1LI1/CHMP7/PSMC6/SKA1/TUBB2A/PSMA7/UBE2S/PSMB7/PAFAH1B1/UBB/BUB1/KIF2C/ANAPC11/TNPO1/PPP2R1B/SEC13/CDC23/PPP2R2A/PSMD4/NUP107/CDCA5/CHMP2B/PSMC2/PSMD13/CDC27/PPP2CB/CCNB1/RANBP2/PSME3/TUBA4A/TAOK1/CENPI/NUP188/CKAP5/NUP133/SMC3/SGO1…	5690/5691/1778/5686/23198/10383/1780/9861/3619/6249/5704/10213/7316/5705/11065/5717/81565/5700/5693/5708/84790/5714/5684/5515/4000/5685/51143/91782/5706/220134/7280/5688/27338/5695/5048/7314/699/11004/51529/3842/5519/6396/8697/5520/5710/57122/113130/25978/5701/5719/996/5516/891/5903/10197/7277/57551/2491/23511/9793/55746/9126/151648/55839/4928/5713/9631/347733/81929/25909/5692/22919/27243/10726/1…	111
												R-HSA-176409	APC/C:Cdc20 mediated degradation of mitotic proteins	48/2538	75/9921	2.37e-12	4e-10	ENSG00000133101/ENSG00000126067/ENSG00000277791/ENSG00000143106/ENSG00000068878/ENSG00000163636/ENSG00000013275/ENSG00000115233/ENSG00000150991/ENSG00000087191/ENSG00000175063/ENSG00000108671/ENSG00000100764/ENSG00000100804/ENSG00000175166/ENSG00000099341/ENSG00000100567/ENSG00000041357/ENSG00000100519/ENSG00000101182/ENSG00000108106/ENSG00000136930/ENSG00000170315/ENSG00000141552/ENSG00000094880…	CCNA1/PSMB2/PSMB3/PSMA5/PSME4/PSMD6/PSMC4/PSMD14/UBC/PSMC5/UBE2C/PSMD11/PSMC1/PSMB5/PSMD2/PSMD8/PSMA3/PSMA4/PSMC6/PSMA7/UBE2S/PSMB7/UBB/ANAPC11/CDC23/PSMD4/PSMC2/PSMD13/CDC27/CCNB1/PSME3/PSMD7/PSMB4/PSMD9/PSMC3/PSMB10/BUB3/ANAPC10/PSMA6/PTTG1/PSME2/ANAPC2/PSMD12/CDC20/ANAPC15/PSMB11/MAD2L1/ANAPC4	8900/5690/5691/5686/23198/9861/5704/10213/7316/5705/11065/5717/5700/5693/5708/5714/5684/5685/5706/5688/27338/5695/7314/51529/8697/5710/5701/5719/996/891/10197/5713/5692/5715/5702/5699/9184/10393/5687/9232/5721/29882/5718/991/25906/122706/4085/29945	48
												R-HSA-69620	Cell Cycle Checkpoints	128/2538	290/9921	2.69e-12	4.08e-10	ENSG00000133101/ENSG00000126067/ENSG00000277791/ENSG00000170027/ENSG00000197102/ENSG00000143106/ENSG00000068878/ENSG00000158560/ENSG00000163636/ENSG00000149503/ENSG00000130779/ENSG00000013275/ENSG00000115233/ENSG00000150991/ENSG00000087191/ENSG00000175063/ENSG00000174371/ENSG00000108671/ENSG00000166579/ENSG00000100764/ENSG00000100804/ENSG00000175166/ENSG00000099341/ENSG00000135679/ENSG00000100567…	CCNA1/PSMB2/PSMB3/YWHAG/DYNC1H1/PSMA5/PSME4/DYNC1I1/PSMD6/INCENP/CLIP1/PSMC4/PSMD14/UBC/PSMC5/UBE2C/EXO1/PSMD11/NDEL1/PSMC1/PSMB5/PSMD2/PSMD8/MDM2/PSMA3/PPP2CA/YWHAZ/MDM4/PSMA4/DYNC1LI1/PSMC6/SKA1/HUS1/PSMA7/KAT5/ORC6/ORC1/CLSPN/MDC1/RPA2/UBE2S/YWHAB/CDC25A/PSMB7/PAFAH1B1/UBB/SFN/BUB1/KIF2C/RNF168/ANAPC11/PPP2R1B/RFC5/SEC13/CDC23/PSMD4/NUP107/H2AX/PSMC2/YWHAQ/PSMD13/CDC27/PPP2CB/CCNB1/RANBP2/PSME…	8900/5690/5691/7532/1778/5686/23198/1780/9861/3619/6249/5704/10213/7316/5705/11065/9156/5717/81565/5700/5693/5708/5714/4193/5684/5515/7534/4194/5685/51143/5706/220134/3364/5688/10524/23594/4998/63967/9656/6118/27338/7529/993/5695/5048/7314/2810/699/11004/165918/51529/5519/5985/6396/8697/5710/57122/3014/5701/10971/5719/996/5516/891/5903/10197/57551/2491/9793/55746/151648/55839/4928/8970/84515/5713…	128
All treatments vs control - intersected Reactome pathways (downregulated) - P values shown for 11KDHT treatment												R-HSA-1236974	ER-Phagosome pathway	53/2538	87/9921	3e-12	4.13e-10	ENSG00000126067/ENSG00000277791/ENSG00000179218/ENSG00000143106/ENSG00000068878/ENSG00000163636/ENSG00000013275/ENSG00000115233/ENSG00000150991/ENSG00000087191/ENSG00000204525/ENSG00000108671/ENSG00000167004/ENSG00000100764/ENSG00000100804/ENSG00000175166/ENSG00000168394/ENSG00000099341/ENSG00000174130/ENSG00000100567/ENSG00000041357/ENSG00000100519/ENSG00000101182/ENSG00000136930/ENSG00000170315…	PSMB2/PSMB3/CALR/PSMA5/PSME4/PSMD6/PSMC4/PSMD14/UBC/PSMC5/HLA-C/PSMD11/PDIA3/PSMC1/PSMB5/PSMD2/TAP1/PSMD8/TLR6/PSMA3/PSMA4/PSMC6/PSMA7/PSMB7/UBB/TAP2/HLA-A/B2M/PSMD4/HLA-E/SEC22B/PSMC2/PSMD13/SEC61G/HLA-B/PSME3/PSMD7/STX4/PSMB4/SEC61A2/PSMD9/PSMC3/CHUK/PSMB10/PSMA6/IKBKG/CD36/PSME2/CD14/BTK/SEC61A1/PSMD12/PSMB11	5690/5691/811/5686/23198/9861/5704/10213/7316/5705/3107/5717/2923/5700/5693/5708/6890/5714/10333/5684/5685/5706/5688/5695/7314/6891/3105/567/5710/3133/9554/5701/5719/23480/3106/10197/5713/6810/5692/55176/5715/5702/1147/5699/5687/8517/948/5721/929/695/29927/5718/122706	53
ReactomeID	Description	GeneRatio	BgRatio	pvalue	padj	geneID	geneName	EntrezID	Count			R-HSA-176814	Activation of APC/C and APC/C:Cdc20 mediated degradation of mitotic proteins	48/2538	76/9921	4.85e-12	5.73e-10	ENSG00000133101/ENSG00000126067/ENSG00000277791/ENSG00000143106/ENSG00000068878/ENSG00000163636/ENSG00000013275/ENSG00000115233/ENSG00000150991/ENSG00000087191/ENSG00000175063/ENSG00000108671/ENSG00000100764/ENSG00000100804/ENSG00000175166/ENSG00000099341/ENSG00000100567/ENSG00000041357/ENSG00000100519/ENSG00000101182/ENSG00000108106/ENSG00000136930/ENSG00000170315/ENSG00000141552/ENSG00000094880…	CCNA1/PSMB2/PSMB3/PSMA5/PSME4/PSMD6/PSMC4/PSMD14/UBC/PSMC5/UBE2C/PSMD11/PSMC1/PSMB5/PSMD2/PSMD8/PSMA3/PSMA4/PSMC6/PSMA7/UBE2S/PSMB7/UBB/ANAPC11/CDC23/PSMD4/PSMC2/PSMD13/CDC27/CCNB1/PSME3/PSMD7/PSMB4/PSMD9/PSMC3/PSMB10/BUB3/ANAPC10/PSMA6/PTTG1/PSME2/ANAPC2/PSMD12/CDC20/ANAPC15/PSMB11/MAD2L1/ANAPC4	8900/5690/5691/5686/23198/9861/5704/10213/7316/5705/11065/5717/5700/5693/5708/5714/5684/5685/5706/5688/27338/5695/7314/51529/8697/5710/5701/5719/996/891/10197/5713/5692/5715/5702/5699/9184/10393/5687/9232/5721/29882/5718/991/25906/122706/4085/29945	48
R-HSA-9012999	RHO GTPase cycle	67/884	441/9906	8.56e-06	0.00213441	ENSG00000134215/ENSG00000138639/ENSG00000139117/ENSG00000162738/ENSG00000139211/ENSG00000275832/ENSG00000071051/ENSG00000196155/ENSG00000163947/ENSG00000177469/ENSG00000063601/ENSG00000173218/ENSG00000165801/ENSG00000137831/ENSG00000076706/ENSG00000187239/ENSG00000120008/ENSG00000137942/ENSG00000150760/ENSG00000137962/ENSG00000169851/ENSG00000188747/ENSG00000137218/ENSG00000197694/ENSG00000107099…	VAV3/ARHGAP24/CPNE8/VANGL2/AMIGO2/ARHGAP23/NCK2/PLEKHG4/ARHGEF3/CAVIN1/MTMR1/VANGL1/ARHGEF40/UACA/MCAM/FNBP1/WDR11/FNBP1L/DOCK1/ARHGAP29/PCDH7/NOXA1/FRS3/SPTAN1/DOCK8/PLXNB1/CYFIP2/AKAP12/FARP1/PRAG1/PKN3/FLOT1/IQGAP3/CAV1/IQGAP2/PAK6/BUB1B-PAK6/DBN1/ARHGEF28/PTK2B/JUP/PAK1/ANKLE2/PLEKHG4B/STK38/ALDH3A2/KCTD3/SYDE1/RHOB/DLG5/TMEM59/COPS4/PTPN13/RHOBTB2/ARHGAP4/ADD3/ARHGEF11/TNFAIP1/ABR/PREX1/PIK3…	10451/83478/144402/57216/347902/57636/8440/25894/50650/284119/8776/81839/55701/55075/4162/23048/55717/54874/1793/9411/5099/10811/10817/6709/81704/5364/26999/9590/10160/157285/29941/10211/128239/857/10788/56924/106821730/1627/64283/2185/3728/5058/23141/153478/11329/224/51133/85360/388/9231/9528/51138/5783/23221/393/120/9826/7126/29/57580/8503/55160/7171/7456/6793/8936/23580	67			R-HSA-1169091	Activation of NF-kappaB in B cells	44/2538	67/9921	5.29e-12	5.73e-10	ENSG00000126067/ENSG00000277791/ENSG00000143106/ENSG00000068878/ENSG00000163636/ENSG00000013275/ENSG00000115233/ENSG00000150991/ENSG00000087191/ENSG00000108671/ENSG00000100764/ENSG00000100804/ENSG00000175166/ENSG00000099341/ENSG00000100567/ENSG00000104825/ENSG00000041357/ENSG00000100519/ENSG00000101182/ENSG00000173039/ENSG00000136930/ENSG00000170315/ENSG00000172175/ENSG00000159352/ENSG00000161057…	PSMB2/PSMB3/PSMA5/PSME4/PSMD6/PSMC4/PSMD14/UBC/PSMC5/PSMD11/PSMC1/PSMB5/PSMD2/PSMD8/PSMA3/NFKBIB/PSMA4/PSMC6/PSMA7/RELA/PSMB7/UBB/MALT1/PSMD4/PSMC2/PSMD13/PSME3/SKP1/BCL10/PSMD7/NFKBIE/PSMB4/PSMD9/PSMC3/CHUK/PSMB10/PSMA6/IKBKG/REL/PSME2/PSMD12/NFKB1/MAP3K7/PSMB11	5690/5691/5686/23198/9861/5704/10213/7316/5705/5717/5700/5693/5708/5714/5684/4793/5685/5706/5688/5970/5695/7314/10892/5710/5701/5719/10197/6500/8915/5713/4794/5692/5715/5702/1147/5699/5687/8517/5966/5721/5718/4790/6885/122706	44
												R-HSA-174154	APC/C:Cdc20 mediated degradation of Securin	44/2538	67/9921	5.29e-12	5.73e-10	ENSG00000126067/ENSG00000277791/ENSG00000143106/ENSG00000068878/ENSG00000163636/ENSG00000013275/ENSG00000115233/ENSG00000150991/ENSG00000087191/ENSG00000175063/ENSG00000108671/ENSG00000100764/ENSG00000100804/ENSG00000175166/ENSG00000099341/ENSG00000100567/ENSG00000041357/ENSG00000100519/ENSG00000101182/ENSG00000108106/ENSG00000136930/ENSG00000170315/ENSG00000141552/ENSG00000094880/ENSG00000159352…	PSMB2/PSMB3/PSMA5/PSME4/PSMD6/PSMC4/PSMD14/UBC/PSMC5/UBE2C/PSMD11/PSMC1/PSMB5/PSMD2/PSMD8/PSMA3/PSMA4/PSMC6/PSMA7/UBE2S/PSMB7/UBB/ANAPC11/CDC23/PSMD4/PSMC2/PSMD13/CDC27/PSME3/PSMD7/PSMB4/PSMD9/PSMC3/PSMB10/ANAPC10/PSMA6/PTTG1/PSME2/ANAPC2/PSMD12/CDC20/ANAPC15/PSMB11/ANAPC4	5690/5691/5686/23198/9861/5704/10213/7316/5705/11065/5717/5700/5693/5708/5714/5684/5685/5706/5688/27338/5695/7314/51529/8697/5710/5701/5719/996/10197/5713/5692/5715/5702/5699/10393/5687/9232/5721/29882/5718/991/25906/122706/29945	44
												R-HSA-174184	Cdc20:Phospho-APC/C mediated degradation of Cyclin A	46/2538	72/9921	7.47e-12	7.55e-10	ENSG00000133101/ENSG00000126067/ENSG00000277791/ENSG00000143106/ENSG00000068878/ENSG00000163636/ENSG00000013275/ENSG00000115233/ENSG00000150991/ENSG00000087191/ENSG00000175063/ENSG00000108671/ENSG00000100764/ENSG00000100804/ENSG00000175166/ENSG00000099341/ENSG00000100567/ENSG00000041357/ENSG00000100519/ENSG00000101182/ENSG00000108106/ENSG00000136930/ENSG00000170315/ENSG00000141552/ENSG00000094880…	CCNA1/PSMB2/PSMB3/PSMA5/PSME4/PSMD6/PSMC4/PSMD14/UBC/PSMC5/UBE2C/PSMD11/PSMC1/PSMB5/PSMD2/PSMD8/PSMA3/PSMA4/PSMC6/PSMA7/UBE2S/PSMB7/UBB/ANAPC11/CDC23/PSMD4/PSMC2/PSMD13/CDC27/PSME3/PSMD7/PSMB4/PSMD9/PSMC3/PSMB10/BUB3/ANAPC10/PSMA6/PSME2/ANAPC2/PSMD12/CDC20/ANAPC15/PSMB11/MAD2L1/ANAPC4	8900/5690/5691/5686/23198/9861/5704/10213/7316/5705/11065/5717/5700/5693/5708/5714/5684/5685/5706/5688/27338/5695/7314/51529/8697/5710/5701/5719/996/10197/5713/5692/5715/5702/5699/9184/10393/5687/5721/29882/5718/991/25906/122706/4085/29945	46
												R-HSA-5678895	Defective CFTR causes cystic fibrosis	41/2538	61/9921	9.06e-12	8.59e-10	ENSG00000126067/ENSG00000165280/ENSG00000277791/ENSG00000143106/ENSG00000068878/ENSG00000163636/ENSG00000013275/ENSG00000115233/ENSG00000150991/ENSG00000087191/ENSG00000136986/ENSG00000108671/ENSG00000100764/ENSG00000100804/ENSG00000175166/ENSG00000099341/ENSG00000068912/ENSG00000100567/ENSG00000147475/ENSG00000041357/ENSG00000135506/ENSG00000100519/ENSG00000101182/ENSG00000071537/ENSG00000136930…	PSMB2/VCP/PSMB3/PSMA5/PSME4/PSMD6/PSMC4/PSMD14/UBC/PSMC5/DERL1/PSMD11/PSMC1/PSMB5/PSMD2/PSMD8/ERLEC1/PSMA3/ERLIN2/PSMA4/OS9/PSMC6/PSMA7/SEL1L/PSMB7/UBB/PSMD4/PSMC2/PSMD13/PSME3/PSMD7/PSMB4/PSMD9/PSMC3/PSMB10/PSMA6/PSME2/CFTR/PSMD12/ERLIN1/PSMB11	5690/7415/5691/5686/23198/9861/5704/10213/7316/5705/79139/5717/5700/5693/5708/5714/27248/5684/11160/5685/10956/5706/5688/6400/5695/7314/5710/5701/5719/10197/5713/5692/5715/5702/5699/5687/5721/1080/5718/10613/122706	41
												R-HSA-179419	APC:Cdc20 mediated degradation of cell cycle proteins prior to satisfation of the cell cycle checkpoint	46/2538	73/9921	1.52e-11	1.36e-09	ENSG00000133101/ENSG00000126067/ENSG00000277791/ENSG00000143106/ENSG00000068878/ENSG00000163636/ENSG00000013275/ENSG00000115233/ENSG00000150991/ENSG00000087191/ENSG00000175063/ENSG00000108671/ENSG00000100764/ENSG00000100804/ENSG00000175166/ENSG00000099341/ENSG00000100567/ENSG00000041357/ENSG00000100519/ENSG00000101182/ENSG00000108106/ENSG00000136930/ENSG00000170315/ENSG00000141552/ENSG00000094880…	CCNA1/PSMB2/PSMB3/PSMA5/PSME4/PSMD6/PSMC4/PSMD14/UBC/PSMC5/UBE2C/PSMD11/PSMC1/PSMB5/PSMD2/PSMD8/PSMA3/PSMA4/PSMC6/PSMA7/UBE2S/PSMB7/UBB/ANAPC11/CDC23/PSMD4/PSMC2/PSMD13/CDC27/PSME3/PSMD7/PSMB4/PSMD9/PSMC3/PSMB10/BUB3/ANAPC10/PSMA6/PSME2/ANAPC2/PSMD12/CDC20/ANAPC15/PSMB11/MAD2L1/ANAPC4	8900/5690/5691/5686/23198/9861/5704/10213/7316/5705/11065/5717/5700/5693/5708/5714/5684/5685/5706/5688/27338/5695/7314/51529/8697/5710/5701/5719/996/10197/5713/5692/5715/5702/5699/9184/10393/5687/5721/29882/5718/991/25906/122706/4085/29945	46
												R-HSA-1236975	Antigen processing-Cross presentation	57/2538	100/9921	2.13e-11	1.79e-09	ENSG00000126067/ENSG00000135047/ENSG00000277791/ENSG00000179218/ENSG00000143106/ENSG00000068878/ENSG00000163636/ENSG00000013275/ENSG00000115233/ENSG00000150991/ENSG00000087191/ENSG00000204525/ENSG00000108671/ENSG00000167004/ENSG00000100764/ENSG00000100804/ENSG00000175166/ENSG00000168394/ENSG00000099341/ENSG00000174130/ENSG00000100567/ENSG00000041357/ENSG00000100519/ENSG00000101182/ENSG00000163131…	PSMB2/CTSL/PSMB3/CALR/PSMA5/PSME4/PSMD6/PSMC4/PSMD14/UBC/PSMC5/HLA-C/PSMD11/PDIA3/PSMC1/PSMB5/PSMD2/TAP1/PSMD8/TLR6/PSMA3/PSMA4/PSMC6/PSMA7/CTSS/PSMB7/UBB/TAP2/HLA-A/B2M/PSMD4/HLA-E/SEC22B/PSMC2/PSMD13/SEC61G/HLA-B/PSME3/ITGAV/PSMD7/STX4/PSMB4/SEC61A2/PSMD9/PSMC3/CHUK/PSMB10/PSMA6/IKBKG/CD36/PSME2/CD14/BTK/SEC61A1/PSMD12/FCGR1A/PSMB11	5690/1514/5691/811/5686/23198/9861/5704/10213/7316/5705/3107/5717/2923/5700/5693/5708/6890/5714/10333/5684/5685/5706/5688/1520/5695/7314/6891/3105/567/5710/3133/9554/5701/5719/23480/3106/10197/3685/5713/6810/5692/55176/5715/5702/1147/5699/5687/8517/948/5721/929/695/29927/5718/2209/122706	57
												R-HSA-9711123	Cellular response to chemical stress	96/2538	205/9921	2.75e-11	2.2e-09	ENSG00000197063/ENSG00000211445/ENSG00000198517/ENSG00000126067/ENSG00000198431/ENSG00000151012/ENSG00000165280/ENSG00000130766/ENSG00000277791/ENSG00000090013/ENSG00000177156/ENSG00000182446/ENSG00000143106/ENSG00000161011/ENSG00000068878/ENSG00000163636/ENSG00000013275/ENSG00000117450/ENSG00000023909/ENSG00000115233/ENSG00000150991/ENSG00000140941/ENSG00000100292/ENSG00000087191/ENSG00000138413…	MAFG/GPX3/MAFK/PSMB2/TXNRD1/SLC7A11/VCP/SESN2/PSMB3/BLVRB/TALDO1/NPLOC4/PSMA5/SQSTM1/PSME4/PSMD6/PSMC4/PRDX1/GCLM/PSMD14/UBC/MAP1LC3B/HMOX1/PSMC5/IDH1/SRXN1/GSR/PSMD11/P4HB/PSMC1/PSMB5/PSMD2/PSMD8/UFD1/BACH1/PSMA3/PSMA4/GSK3B/PSMC6/KEAP1/UBXN7/EIF2AK3/PSMA7/PRDX2/SP1/RELA/PSMB7/TXN/UBB/MED1/NUDT2/ME1/PSMD4/PSMC2/DPP3/SOD1/PSMD13/PSME3/G6PD/SKP1/ABCC1/TBL1XR1/NFE2L2/CHD9/TBL1X/PSMD7/ATP7A/PSMB4/ST…	4097/2878/7975/5690/7296/23657/7415/83667/5691/645/6888/55666/5686/8878/23198/9861/5704/5052/2730/10213/7316/81631/3162/5705/3417/140809/2936/5717/5034/5700/5693/5708/5714/7353/571/5684/5685/2932/5706/9817/26043/9451/5688/7001/6667/5970/5695/7295/7314/5469/318/4199/5710/5701/10072/6647/5719/10197/2539/6500/4363/79718/4780/80205/6907/5713/538/5692/6774/374/9429/5715/5702/5699/30001/116228/23054/56…	96
												R-HSA-162909	Host Interactions of HIV factors	68/2538	129/9921	3.33e-11	2.44e-09	ENSG00000126067/ENSG00000277791/ENSG00000143106/ENSG00000068878/ENSG00000163636/ENSG00000013275/ENSG00000115233/ENSG00000150991/ENSG00000101146/ENSG00000087191/ENSG00000108671/ENSG00000100764/ENSG00000100804/ENSG00000175166/ENSG00000099341/ENSG00000166747/ENSG00000100567/ENSG00000041357/ENSG00000100519/ENSG00000101182/ENSG00000124789/ENSG00000136930/ENSG00000047249/ENSG00000143761/ENSG00000170315…	PSMB2/PSMB3/PSMA5/PSME4/PSMD6/PSMC4/PSMD14/UBC/RAE1/PSMC5/PSMD11/PSMC1/PSMB5/PSMD2/PSMD8/AP1G1/PSMA3/PSMA4/PSMC6/PSMA7/NUP153/PSMB7/ATP6V1H/ARF1/UBB/HLA-A/B2M/NUP214/SEC13/PSMD4/ELOC/SLC25A4/NUP107/PSMC2/PSMD13/RANBP2/PSME3/SKP1/NUP188/NUP133/NUP98/PSMD7/NUP155/CCNT1/SEH1L/AP2B1/PSMB4/PSMD9/PSMC3/HMGA1/PSMB10/POM121/PSMA6/KPNA1/PSME2/AP2M1/NUP37/CUL5/NUP160/PSMD12/AP1S2/CDK9/NUP50/TPR/AP1S1/RANBP…	5690/5691/5686/23198/9861/5704/10213/7316/8480/5705/5717/5700/5693/5708/5714/164/5684/5685/5706/5688/9972/5695/51606/375/7314/3105/567/8021/6396/5710/6921/291/57122/5701/5719/5903/10197/6500/23511/55746/4928/5713/9631/904/81929/163/5692/5715/5702/3159/5699/9883/5687/3836/5721/1173/79023/8065/23279/5718/8905/1025/10762/7175/1174/5902/5879/122706	68
												R-HSA-5362768	Hh mutants are degraded by ERAD	38/2538	56/9921	3.38e-11	2.44e-09	ENSG00000126067/ENSG00000165280/ENSG00000277791/ENSG00000143106/ENSG00000068878/ENSG00000163636/ENSG00000013275/ENSG00000115233/ENSG00000150991/ENSG00000087191/ENSG00000108671/ENSG00000100764/ENSG00000100804/ENSG00000175166/ENSG00000099341/ENSG00000068912/ENSG00000100567/ENSG00000041357/ENSG00000135506/ENSG00000100519/ENSG00000101182/ENSG00000071537/ENSG00000136930/ENSG00000170315/ENSG00000159352…	PSMB2/VCP/PSMB3/PSMA5/PSME4/PSMD6/PSMC4/PSMD14/UBC/PSMC5/PSMD11/PSMC1/PSMB5/PSMD2/PSMD8/ERLEC1/PSMA3/PSMA4/OS9/PSMC6/PSMA7/SEL1L/PSMB7/UBB/PSMD4/PSMC2/PSMD13/PSME3/PSMD7/PSMB4/PSMD9/PSMC3/PSMB10/SYVN1/PSMA6/PSME2/PSMD12/PSMB11	5690/7415/5691/5686/23198/9861/5704/10213/7316/5705/5717/5700/5693/5708/5714/27248/5684/5685/10956/5706/5688/6400/5695/7314/5710/5701/5719/10197/5713/5692/5715/5702/5699/84447/5687/5721/5718/122706	38
												R-HSA-176408	Regulation of APC/C activators between G1/S and early anaphase	48/2538	80/9921	6.88e-11	4.74e-09	ENSG00000133101/ENSG00000126067/ENSG00000277791/ENSG00000143106/ENSG00000068878/ENSG00000163636/ENSG00000013275/ENSG00000115233/ENSG00000150991/ENSG00000087191/ENSG00000175063/ENSG00000108671/ENSG00000100764/ENSG00000100804/ENSG00000175166/ENSG00000099341/ENSG00000100567/ENSG00000041357/ENSG00000100519/ENSG00000101182/ENSG00000108106/ENSG00000136930/ENSG00000170315/ENSG00000141552/ENSG00000094880…	CCNA1/PSMB2/PSMB3/PSMA5/PSME4/PSMD6/PSMC4/PSMD14/UBC/PSMC5/UBE2C/PSMD11/PSMC1/PSMB5/PSMD2/PSMD8/PSMA3/PSMA4/PSMC6/PSMA7/UBE2S/PSMB7/UBB/ANAPC11/CDC23/PSMD4/PSMC2/PSMD13/CDC27/CCNB1/PSME3/SKP1/PSMD7/PSMB4/PSMD9/PSMC3/PSMB10/BUB3/ANAPC10/PSMA6/PSME2/ANAPC2/PSMD12/CDC20/ANAPC15/PSMB11/MAD2L1/ANAPC4	8900/5690/5691/5686/23198/9861/5704/10213/7316/5705/11065/5717/5700/5693/5708/5714/5684/5685/5706/5688/27338/5695/7314/51529/8697/5710/5701/5719/996/891/10197/6500/5713/5692/5715/5702/5699/9184/10393/5687/5721/29882/5718/991/25906/122706/4085/29945	48
[truncated: 203 more rows]

## Sheet: Supplementary_Table_4
10 nM T vs control (ethanol)								10 nM 11KT vs control (ethanol)								10 nM DHT vs control (ethanol)								10 nM 11KDHT vs control (ethanol)
[truncated: 40 more rows]
